# Supplementary material
Source: publisher figshare collection journal article supplement (https://acs.figshare.com/ndownloader/files/3634836)
Supplement: Supplementary file 1 [file 3634836]

data_testm1
_audit_creation_date              2014-10-06
_audit_creation_method
;
Olex2 1.2
(compiled 2014.09.19 svn.r3010 for OlexSys, GUI svn.r4874)
;
_shelxl_version_number            2013-4
_publ_contact_author_address      ?
_publ_contact_author_email        ?
_publ_contact_author_name         ''
_publ_contact_author_phone        ?
_publ_section_references
;
Bourhis, L.J., Dolomanov, O.V., Gildea, R.J., Howard, J.A.K., Puschmann, H.
 (2013). in preparation.

Dolomanov, O.V., Bourhis, L.J., Gildea, R.J, Howard, J.A.K. & Puschmann, H.
 (2009), J. Appl. Cryst. 42, 339-341.

Sheldrick, G.M. (2008). Acta Cryst. A64, 112-122.
;
_chemical_name_common             ?
_chemical_name_systematic
;
 ?
;
_chemical_formula_moiety          'C17 H21 N O4'
_chemical_formula_sum             'C17 H21 N O4'
_chemical_formula_weight          303.35
_chemical_melting_point           ?
loop_
  _atom_type_symbol
  _atom_type_description
  _atom_type_scat_dispersion_real
  _atom_type_scat_dispersion_imag
  _atom_type_scat_source
 'C' 'C' 0.0033 0.0016 'International Tables Vol C Tables 4.2.6.8 and 6.1.1.4'
 'H' 'H' 0.0000 0.0000 'International Tables Vol C Tables 4.2.6.8 and 6.1.1.4'
 'N' 'N' 0.0061 0.0033 'International Tables Vol C Tables 4.2.6.8 and 6.1.1.4'
 'O' 'O' 0.0106 0.0060 'International Tables Vol C Tables 4.2.6.8 and 6.1.1.4'

_shelx_space_group_comment
;
The symmetry employed for this shelxl refinement is uniquely defined
by the following loop, which should always be used as a source of
symmetry information in preference to the above space-group names.
They are only intended as comments.
;
_space_group_crystal_system       'monoclinic'
_space_group_IT_number            14
_space_group_name_H-M_alt         'P 1 21/n 1'
_space_group_name_Hall            '-P 2yn'
loop_
  _space_group_symop_operation_xyz
 'x, y, z'
 '-x+1/2, y+1/2, -z+1/2'
 '-x, -y, -z'
 'x-1/2, -y-1/2, z-1/2'

_cell_length_a                    8.9328(3)
_cell_length_b                    13.8493(4)
_cell_length_c                    12.2908(3)
_cell_angle_alpha                 90
_cell_angle_beta                  101.453(2)
_cell_angle_gamma                 90
_cell_volume                      1490.25(8)
_cell_formula_units_Z             4
_cell_measurement_reflns_used     3629
_cell_measurement_temperature     100.00
_cell_measurement_theta_max       28.31
_cell_measurement_theta_min       2.59
_shelx_estimated_absorpt_T_max    ?
_shelx_estimated_absorpt_T_min    ?
_exptl_absorpt_coefficient_mu     0.096
_exptl_absorpt_correction_T_max   0.7457
_exptl_absorpt_correction_T_min   0.6919
_exptl_absorpt_correction_type    multi-scan
_exptl_absorpt_process_details
;
SADABS-2012/1 (Bruker,2012) was used for absorption correction.
wR2(int) was 0.0482 before and 0.0441 after correction.
The Ratio of minimum to maximum transmission is 0.9279.
The \l/2 correction factor is 0.0015.
;
_exptl_crystal_colour             colourless
_exptl_crystal_colour_primary     colourless
_exptl_crystal_density_diffrn     1.352
_exptl_crystal_density_meas       .
_exptl_crystal_density_method     ?
_exptl_crystal_description        block
_exptl_crystal_F_000              648
_exptl_crystal_size_max           0.46
_exptl_crystal_size_mid           0.23
_exptl_crystal_size_min           0.16
_exptl_special_details
;
 ?
;
_exptl_transmission_factor_max    ?
_exptl_transmission_factor_min    ?
_diffrn_reflns_av_R_equivalents   0.0323
_diffrn_reflns_av_unetI/netI      0.0293
_diffrn_reflns_Laue_measured_fraction_full 1.000
_diffrn_reflns_Laue_measured_fraction_max 0.996
_diffrn_reflns_limit_h_max        11
_diffrn_reflns_limit_h_min        -11
_diffrn_reflns_limit_k_max        18
_diffrn_reflns_limit_k_min        -18
_diffrn_reflns_limit_l_max        13
_diffrn_reflns_limit_l_min        -16
_diffrn_reflns_number             13836
_diffrn_reflns_point_group_measured_fraction_full 1.000
_diffrn_reflns_point_group_measured_fraction_max 0.996
_diffrn_reflns_theta_full         26.000
_diffrn_reflns_theta_max          28.309
_diffrn_reflns_theta_min          2.241
_diffrn_ambient_temperature       100.00
_diffrn_detector                  'Bruker area detector'
_diffrn_detector_area_resol_mean  ?
_diffrn_detector_type             'CCD area detector'
_diffrn_measured_fraction_theta_full 1.000
_diffrn_measured_fraction_theta_max 0.996
_diffrn_measurement_device        'Bruker Apex II kappa CCDC area detector'
_diffrn_measurement_device_type   'Bruker Apex II kappa CCDC area detector'
_diffrn_measurement_method        '\f and \w scans'
_diffrn_radiation_monochromator   graphite
_diffrn_radiation_type            MoK\a
_diffrn_radiation_wavelength      0.71073
_diffrn_source                    'fine-focus sealed tube'
_diffrn_standards_number          0
_reflns_Friedel_coverage          0.000
_reflns_Friedel_fraction_full     .
_reflns_Friedel_fraction_max      .
_reflns_number_gt                 2965
_reflns_number_total              3695
_reflns_special_details
;
 Reflections were merged by SHELXL according to the crystal
 class for the calculation of statistics and refinement.
 
 _reflns_Friedel_fraction is defined as the number of unique
 Friedel pairs measured divided by the number that would be
 possible theoretically, ignoring centric projections and
 systematic absences.
;
_reflns_threshold_expression      'I > 2\s(I)'
_computing_cell_refinement        'SAINT v8.27A (Bruker, 2012)'
_computing_data_collection        ?
_computing_data_reduction         'SAINT v8.27A (Bruker, 2012)'
_computing_molecular_graphics     'Olex2 (Dolomanov et al., 2009)'
_computing_publication_material   'Olex2 (Dolomanov et al., 2009)'
_computing_structure_refinement   'ShelXL (Sheldrick, 2008)'
_computing_structure_solution     'olex2.solve (Bourhis et al., 2013)'
_refine_diff_density_max          0.355
_refine_diff_density_min          -0.202
_refine_diff_density_rms          0.045
_refine_ls_extinction_coef        .
_refine_ls_extinction_method      none
_refine_ls_goodness_of_fit_ref    1.042
_refine_ls_hydrogen_treatment     constr
_refine_ls_matrix_type            full
_refine_ls_number_parameters      201
_refine_ls_number_reflns          3695
_refine_ls_number_restraints      0
_refine_ls_R_factor_all           0.0535
_refine_ls_R_factor_gt            0.0405
_refine_ls_restrained_S_all       1.042
_refine_ls_shift/su_max           0.001
_refine_ls_shift/su_mean          0.000
_refine_ls_structure_factor_coef  Fsqd
_refine_ls_weighting_details
'w=1/[\s^2^(Fo^2^)+(0.0456P)^2^+0.4795P] where P=(Fo^2^+2Fc^2^)/3'
_refine_ls_weighting_scheme       calc
_refine_ls_wR_factor_gt           0.0960
_refine_ls_wR_factor_ref          0.1029
_refine_special_details
;
 ?
;
_olex2_refinement_description
;
1. Fixed Uiso
 At 1.2 times of:
  All C(H) groups, All C(H,H) groups
 At 1.5 times of:
  All C(H,H,H) groups
2.a Ternary CH refined with riding coordinates:
 C7(H7)
2.b Secondary CH2 refined with riding coordinates:
 C2(H2A,H2B), C3(H3A,H3B), C5(H5A,H5B), C6(H6A,H6B), C10(H10A,H10B), C11(H11A,
 H11B)
2.c Aromatic/amide H refined with riding coordinates:
 C12(H12), C15(H15)
2.d Idealised Me refined as rotating group:
 C16(H16A,H16B,H16C), C17(H17A,H17B,H17C)
;
_atom_sites_solution_hydrogens    geom
_atom_sites_solution_primary      iterative
_atom_sites_solution_secondary    ?
loop_
  _atom_site_label
  _atom_site_type_symbol
  _atom_site_fract_x
  _atom_site_fract_y
  _atom_site_fract_z
  _atom_site_U_iso_or_equiv
  _atom_site_adp_type
  _atom_site_occupancy
  _atom_site_site_symmetry_order
  _atom_site_calc_flag
  _atom_site_refinement_flags_posn
  _atom_site_refinement_flags_adp
  _atom_site_refinement_flags_occupancy
  _atom_site_disorder_assembly
  _atom_site_disorder_group
 O1 O 0.21785(12) 0.63396(8) 0.96185(8) 0.0281(2) Uani 1 1 d . . . . .
 O2 O 0.59630(12) 0.53780(8) 0.69550(8) 0.0286(2) Uani 1 1 d . . . . .
 O3 O -0.03799(10) 0.32535(7) 0.38315(7) 0.0185(2) Uani 1 1 d . . . . .
 O4 O -0.28739(10) 0.30713(7) 0.45859(7) 0.0218(2) Uani 1 1 d . . . . .
 N1 N 0.20635(12) 0.51443(8) 0.83554(8) 0.0172(2) Uani 1 1 d . . . . .
 C1 C 0.25472(15) 0.60246(10) 0.87710(10) 0.0193(3) Uani 1 1 d . . . . .
 C2 C 0.35716(16) 0.66194(9) 0.81866(10) 0.0206(3) Uani 1 1 d . . . . .
 H2A H 0.3524 0.7301 0.8420 0.025 Uiso 1 1 calc R . . . .
 H2B H 0.3161 0.6591 0.7377 0.025 Uiso 1 1 calc R . . . .
 C3 C 0.52678(16) 0.63032(10) 0.84045(11) 0.0245(3) Uani 1 1 d . . . . .
 H3A H 0.5882 0.6820 0.8149 0.029 Uiso 1 1 calc R . . . .
 H3B H 0.5638 0.6222 0.9214 0.029 Uiso 1 1 calc R . . . .
 C4 C 0.55129(15) 0.53730(10) 0.78256(11) 0.0210(3) Uani 1 1 d . . . . .
 C5 C 0.51017(15) 0.44321(10) 0.83199(11) 0.0210(3) Uani 1 1 d . . . . .
 H5A H 0.4893 0.4551 0.9070 0.025 Uiso 1 1 calc R . . . .
 H5B H 0.5969 0.3976 0.8391 0.025 Uiso 1 1 calc R . . . .
 C6 C 0.36847(14) 0.39898(9) 0.75751(10) 0.0180(3) Uani 1 1 d . . . . .
 H6A H 0.3349 0.3419 0.7948 0.022 Uiso 1 1 calc R . . . .
 H6B H 0.3949 0.3772 0.6869 0.022 Uiso 1 1 calc R . . . .
 C7 C 0.23693(14) 0.47261(9) 0.73256(9) 0.0148(2) Uani 1 1 d . . . . .
 H7 H 0.2695 0.5261 0.6878 0.018 Uiso 1 1 calc R . . . .
 C8 C 0.09218(14) 0.42823(8) 0.66475(9) 0.0143(2) Uani 1 1 d . . . . .
 C9 C -0.03953(14) 0.41587(9) 0.70640(10) 0.0161(3) Uani 1 1 d . . . . .
 C10 C -0.04574(15) 0.44463(10) 0.82430(10) 0.0196(3) Uani 1 1 d . . . . .
 H10A H -0.1038 0.3956 0.8574 0.023 Uiso 1 1 calc R . . . .
 H10B H -0.0993 0.5073 0.8239 0.023 Uiso 1 1 calc R . . . .
 C11 C 0.11461(15) 0.45321(10) 0.89377(10) 0.0198(3) Uani 1 1 d . . . . .
 H11A H 0.1103 0.4818 0.9669 0.024 Uiso 1 1 calc R . . . .
 H11B H 0.1616 0.3884 0.9062 0.024 Uiso 1 1 calc R . . . .
 C12 C 0.09550(14) 0.39882(9) 0.55576(10) 0.0149(2) Uani 1 1 d . . . . .
 H12 H 0.1860 0.4076 0.5274 0.018 Uiso 1 1 calc R . . . .
 C13 C -0.03102(14) 0.35741(9) 0.48949(9) 0.0149(2) Uani 1 1 d . . . . .
 C14 C -0.16662(14) 0.34724(9) 0.53063(10) 0.0162(2) Uani 1 1 d . . . . .
 C15 C -0.16928(14) 0.37631(9) 0.63767(10) 0.0170(3) Uani 1 1 d . . . . .
 H15 H -0.2607 0.3694 0.6653 0.020 Uiso 1 1 calc R . . . .
 C16 C 0.10327(15) 0.32392(10) 0.34495(10) 0.0210(3) Uani 1 1 d . . . . .
 H16A H 0.1773 0.2836 0.3946 0.031 Uiso 1 1 calc GR . . . .
 H16B H 0.1431 0.3898 0.3445 0.031 Uiso 1 1 calc GR . . . .
 H16C H 0.0862 0.2974 0.2696 0.031 Uiso 1 1 calc GR . . . .
 C17 C -0.42968(15) 0.30167(12) 0.49556(12) 0.0267(3) Uani 1 1 d . . . . .
 H17A H -0.4188 0.2582 0.5595 0.040 Uiso 1 1 calc GR . . . .
 H17B H -0.5091 0.2770 0.4353 0.040 Uiso 1 1 calc GR . . . .
 H17C H -0.4584 0.3662 0.5171 0.040 Uiso 1 1 calc GR . . . .

loop_
  _atom_site_aniso_label
  _atom_site_aniso_U_11
  _atom_site_aniso_U_22
  _atom_site_aniso_U_33
  _atom_site_aniso_U_23
  _atom_site_aniso_U_13
  _atom_site_aniso_U_12
 O1 0.0347(6) 0.0296(6) 0.0202(5) -0.0097(4) 0.0055(4) 0.0024(4)
 O2 0.0235(5) 0.0312(6) 0.0330(6) 0.0019(4) 0.0102(4) 0.0010(4)
 O3 0.0188(5) 0.0231(5) 0.0132(4) -0.0042(3) 0.0020(3) -0.0024(4)
 O4 0.0169(5) 0.0294(5) 0.0180(4) -0.0042(4) 0.0008(4) -0.0056(4)
 N1 0.0198(5) 0.0188(5) 0.0127(5) -0.0026(4) 0.0025(4) -0.0004(4)
 C1 0.0195(6) 0.0209(6) 0.0147(6) -0.0030(5) -0.0034(5) 0.0050(5)
 C2 0.0268(7) 0.0147(6) 0.0177(6) -0.0024(5) -0.0022(5) 0.0001(5)
 C3 0.0246(7) 0.0217(7) 0.0245(7) -0.0012(5) -0.0016(5) -0.0059(6)
 C4 0.0125(6) 0.0233(7) 0.0248(7) 0.0007(5) -0.0023(5) -0.0003(5)
 C5 0.0186(7) 0.0203(7) 0.0218(6) 0.0005(5) -0.0016(5) 0.0006(5)
 C6 0.0175(6) 0.0160(6) 0.0192(6) -0.0009(5) 0.0005(5) -0.0001(5)
 C7 0.0164(6) 0.0152(6) 0.0122(5) -0.0014(4) 0.0018(4) -0.0007(5)
 C8 0.0167(6) 0.0114(5) 0.0137(5) 0.0004(4) 0.0003(5) 0.0009(4)
 C9 0.0181(6) 0.0163(6) 0.0138(5) 0.0005(4) 0.0025(5) 0.0019(5)
 C10 0.0187(6) 0.0260(7) 0.0141(6) -0.0012(5) 0.0035(5) 0.0005(5)
 C11 0.0205(7) 0.0254(7) 0.0134(6) -0.0007(5) 0.0030(5) -0.0005(5)
 C12 0.0165(6) 0.0132(6) 0.0150(5) 0.0011(4) 0.0032(5) 0.0017(5)
 C13 0.0192(6) 0.0131(6) 0.0119(5) 0.0002(4) 0.0014(5) 0.0018(5)
 C14 0.0159(6) 0.0150(6) 0.0162(6) 0.0007(4) -0.0004(5) -0.0005(5)
 C15 0.0164(6) 0.0180(6) 0.0167(6) 0.0016(5) 0.0036(5) 0.0016(5)
 C16 0.0221(7) 0.0248(7) 0.0173(6) -0.0035(5) 0.0070(5) -0.0013(5)
 C17 0.0168(7) 0.0380(8) 0.0250(7) -0.0033(6) 0.0030(5) -0.0049(6)

_geom_special_details
;
 All esds (except the esd in the dihedral angle between two l.s. planes)
 are estimated using the full covariance matrix.  The cell esds are taken
 into account individually in the estimation of esds in distances, angles
 and torsion angles; correlations between esds in cell parameters are only
 used when they are defined by crystal symmetry.  An approximate (isotropic)
 treatment of cell esds is used for estimating esds involving l.s. planes.
;
loop_
  _geom_bond_atom_site_label_1
  _geom_bond_atom_site_label_2
  _geom_bond_distance
  _geom_bond_site_symmetry_2
  _geom_bond_publ_flag
 O1 C1 1.2329(15) . ?
 O2 C4 1.2155(16) . ?
 O3 C13 1.3700(14) . ?
 O3 C16 1.4312(15) . ?
 O4 C14 1.3701(15) . ?
 O4 C17 1.4342(16) . ?
 N1 C1 1.3588(17) . ?
 N1 C7 1.4661(15) . ?
 N1 C11 1.4614(16) . ?
 C1 C2 1.5142(19) . ?
 C2 H2A 0.9900 . ?
 C2 H2B 0.9900 . ?
 C2 C3 1.549(2) . ?
 C3 H3A 0.9900 . ?
 C3 H3B 0.9900 . ?
 C3 C4 1.5085(19) . ?
 C4 C5 1.5136(19) . ?
 C5 H5A 0.9900 . ?
 C5 H5B 0.9900 . ?
 C5 C6 1.5347(17) . ?
 C6 H6A 0.9900 . ?
 C6 H6B 0.9900 . ?
 C6 C7 1.5400(17) . ?
 C7 H7 1.0000 . ?
 C7 C8 1.5220(16) . ?
 C8 C9 1.3837(17) . ?
 C8 C12 1.4060(16) . ?
 C9 C10 1.5144(16) . ?
 C9 C15 1.4030(17) . ?
 C10 H10A 0.9900 . ?
 C10 H10B 0.9900 . ?
 C10 C11 1.5196(18) . ?
 C11 H11A 0.9900 . ?
 C11 H11B 0.9900 . ?
 C12 H12 0.9500 . ?
 C12 C13 1.3799(17) . ?
 C13 C14 1.4092(17) . ?
 C14 C15 1.3805(17) . ?
 C15 H15 0.9500 . ?
 C16 H16A 0.9800 . ?
 C16 H16B 0.9800 . ?
 C16 H16C 0.9800 . ?
 C17 H17A 0.9800 . ?
 C17 H17B 0.9800 . ?
 C17 H17C 0.9800 . ?

loop_
  _geom_angle_atom_site_label_1
  _geom_angle_atom_site_label_2
  _geom_angle_atom_site_label_3
  _geom_angle
  _geom_angle_site_symmetry_1
  _geom_angle_site_symmetry_3
  _geom_angle_publ_flag
 C13 O3 C16 116.20(9) . . ?
 C14 O4 C17 116.76(10) . . ?
 C1 N1 C7 125.39(10) . . ?
 C1 N1 C11 120.26(10) . . ?
 C11 N1 C7 114.35(10) . . ?
 O1 C1 N1 121.11(13) . . ?
 O1 C1 C2 119.76(12) . . ?
 N1 C1 C2 119.13(11) . . ?
 C1 C2 H2A 108.5 . . ?
 C1 C2 H2B 108.5 . . ?
 C1 C2 C3 115.27(11) . . ?
 H2A C2 H2B 107.5 . . ?
 C3 C2 H2A 108.5 . . ?
 C3 C2 H2B 108.5 . . ?
 C2 C3 H3A 109.0 . . ?
 C2 C3 H3B 109.0 . . ?
 H3A C3 H3B 107.8 . . ?
 C4 C3 C2 112.86(11) . . ?
 C4 C3 H3A 109.0 . . ?
 C4 C3 H3B 109.0 . . ?
 O2 C4 C3 120.98(13) . . ?
 O2 C4 C5 120.48(13) . . ?
 C3 C4 C5 118.45(12) . . ?
 C4 C5 H5A 109.7 . . ?
 C4 C5 H5B 109.7 . . ?
 C4 C5 C6 109.96(10) . . ?
 H5A C5 H5B 108.2 . . ?
 C6 C5 H5A 109.7 . . ?
 C6 C5 H5B 109.7 . . ?
 C5 C6 H6A 109.4 . . ?
 C5 C6 H6B 109.4 . . ?
 C5 C6 C7 111.14(10) . . ?
 H6A C6 H6B 108.0 . . ?
 C7 C6 H6A 109.4 . . ?
 C7 C6 H6B 109.4 . . ?
 N1 C7 C6 110.81(10) . . ?
 N1 C7 H7 107.8 . . ?
 N1 C7 C8 110.40(10) . . ?
 C6 C7 H7 107.8 . . ?
 C8 C7 C6 111.92(10) . . ?
 C8 C7 H7 107.8 . . ?
 C9 C8 C7 122.66(10) . . ?
 C9 C8 C12 119.80(11) . . ?
 C12 C8 C7 117.54(11) . . ?
 C8 C9 C10 121.12(11) . . ?
 C8 C9 C15 119.14(11) . . ?
 C15 C9 C10 119.74(11) . . ?
 C9 C10 H10A 109.6 . . ?
 C9 C10 H10B 109.6 . . ?
 C9 C10 C11 110.41(10) . . ?
 H10A C10 H10B 108.1 . . ?
 C11 C10 H10A 109.6 . . ?
 C11 C10 H10B 109.6 . . ?
 N1 C11 C10 109.14(10) . . ?
 N1 C11 H11A 109.9 . . ?
 N1 C11 H11B 109.9 . . ?
 C10 C11 H11A 109.9 . . ?
 C10 C11 H11B 109.9 . . ?
 H11A C11 H11B 108.3 . . ?
 C8 C12 H12 119.6 . . ?
 C13 C12 C8 120.86(11) . . ?
 C13 C12 H12 119.6 . . ?
 O3 C13 C12 125.07(11) . . ?
 O3 C13 C14 115.50(10) . . ?
 C12 C13 C14 119.43(11) . . ?
 O4 C14 C13 115.55(10) . . ?
 O4 C14 C15 125.01(11) . . ?
 C15 C14 C13 119.44(11) . . ?
 C9 C15 H15 119.4 . . ?
 C14 C15 C9 121.28(12) . . ?
 C14 C15 H15 119.4 . . ?
 O3 C16 H16A 109.5 . . ?
 O3 C16 H16B 109.5 . . ?
 O3 C16 H16C 109.5 . . ?
 H16A C16 H16B 109.5 . . ?
 H16A C16 H16C 109.5 . . ?
 H16B C16 H16C 109.5 . . ?
 O4 C17 H17A 109.5 . . ?
 O4 C17 H17B 109.5 . . ?
 O4 C17 H17C 109.5 . . ?
 H17A C17 H17B 109.5 . . ?
 H17A C17 H17C 109.5 . . ?
 H17B C17 H17C 109.5 . . ?

loop_
  _geom_torsion_atom_site_label_1
  _geom_torsion_atom_site_label_2
  _geom_torsion_atom_site_label_3
  _geom_torsion_atom_site_label_4
  _geom_torsion
  _geom_torsion_site_symmetry_1
  _geom_torsion_site_symmetry_2
  _geom_torsion_site_symmetry_3
  _geom_torsion_site_symmetry_4
  _geom_torsion_publ_flag
 O1 C1 C2 C3 101.64(15) . . . . ?
 O2 C4 C5 C6 -66.87(16) . . . . ?
 O3 C13 C14 O4 -0.32(16) . . . . ?
 O3 C13 C14 C15 179.03(11) . . . . ?
 O4 C14 C15 C9 179.31(12) . . . . ?
 N1 C1 C2 C3 -77.62(15) . . . . ?
 N1 C7 C8 C9 -10.22(16) . . . . ?
 N1 C7 C8 C12 170.04(10) . . . . ?
 C1 N1 C7 C6 100.62(14) . . . . ?
 C1 N1 C7 C8 -134.80(12) . . . . ?
 C1 N1 C11 C10 112.33(13) . . . . ?
 C1 C2 C3 C4 72.64(15) . . . . ?
 C2 C3 C4 O2 99.43(15) . . . . ?
 C2 C3 C4 C5 -77.21(15) . . . . ?
 C3 C4 C5 C6 109.79(13) . . . . ?
 C4 C5 C6 C7 -52.24(14) . . . . ?
 C5 C6 C7 N1 -52.74(14) . . . . ?
 C5 C6 C7 C8 -176.45(10) . . . . ?
 C6 C7 C8 C9 113.71(13) . . . . ?
 C6 C7 C8 C12 -66.02(14) . . . . ?
 C7 N1 C1 O1 176.64(12) . . . . ?
 C7 N1 C1 C2 -4.11(18) . . . . ?
 C7 N1 C11 C10 -67.11(14) . . . . ?
 C7 C8 C9 C10 -1.16(18) . . . . ?
 C7 C8 C9 C15 178.60(11) . . . . ?
 C7 C8 C12 C13 179.58(11) . . . . ?
 C8 C9 C10 C11 -19.18(17) . . . . ?
 C8 C9 C15 C14 1.74(19) . . . . ?
 C8 C12 C13 O3 -179.04(11) . . . . ?
 C8 C12 C13 C14 1.95(18) . . . . ?
 C9 C8 C12 C13 -0.17(18) . . . . ?
 C9 C10 C11 N1 50.69(14) . . . . ?
 C10 C9 C15 C14 -178.49(12) . . . . ?
 C11 N1 C1 O1 -2.74(18) . . . . ?
 C11 N1 C1 C2 176.51(11) . . . . ?
 C11 N1 C7 C6 -79.97(13) . . . . ?
 C11 N1 C7 C8 44.60(14) . . . . ?
 C12 C8 C9 C10 178.57(11) . . . . ?
 C12 C8 C9 C15 -1.67(18) . . . . ?
 C12 C13 C14 O4 178.79(11) . . . . ?
 C12 C13 C14 C15 -1.87(18) . . . . ?
 C13 C14 C15 C9 0.03(19) . . . . ?
 C15 C9 C10 C11 161.05(12) . . . . ?
 C16 O3 C13 C12 8.48(17) . . . . ?
 C16 O3 C13 C14 -172.47(11) . . . . ?
 C17 O4 C14 C13 -176.06(11) . . . . ?
 C17 O4 C14 C15 4.64(18) . . . . ?

_shelx_res_file
;
TITL
CELL 0.71073 8.9328 13.8493 12.2908 90 101.453 90
ZERR 4 0.0003 0.0004 0.0003 0 0.002 0
LATT 1
SYMM 0.5-X,0.5+Y,0.5-Z

SFAC C H N O
UNIT 68 84 4 16

L.S. 20
PLAN  10
TEMP -173.15
fmap 2
MORE -1
BOND $H
ACTA 52
CONF
REM <HKL>//ads.bris.ac.uk/filestore/MyFiles/staff1/hs14463/Documents/Bristol%2
REM 0X-ray/Service/ms1774/work/testm1.hkl</HKL>

WGHT    0.045600    0.479500
FVAR       0.24124
O1    4    0.217848    0.633956    0.961852    11.00000    0.03468    0.02960 =
         0.02015   -0.00968    0.00548    0.00235
O2    4    0.596302    0.537800    0.695502    11.00000    0.02348    0.03124 =
         0.03300    0.00189    0.01019    0.00103
O3    4   -0.037989    0.325353    0.383152    11.00000    0.01878    0.02307 =
         0.01320   -0.00421    0.00199   -0.00239
O4    4   -0.287390    0.307131    0.458594    11.00000    0.01687    0.02945 =
         0.01804   -0.00416    0.00078   -0.00558
N1    3    0.206351    0.514431    0.835543    11.00000    0.01976    0.01877 =
         0.01270   -0.00260    0.00246   -0.00039
C1    1    0.254716    0.602463    0.877101    11.00000    0.01953    0.02086 =
         0.01467   -0.00300   -0.00336    0.00504
C2    1    0.357158    0.661938    0.818661    11.00000    0.02680    0.01467 =
         0.01769   -0.00244   -0.00218    0.00006
AFIX  23
H2A   2    0.352372    0.730108    0.841971    11.00000   -1.20000
H2B   2    0.316141    0.659057    0.737750    11.00000   -1.20000
AFIX   0
C3    1    0.526779    0.630320    0.840454    11.00000    0.02456    0.02167 =
         0.02450   -0.00116   -0.00156   -0.00585
AFIX  23
H3A   2    0.588217    0.681973    0.814892    11.00000   -1.20000
H3B   2    0.563759    0.622179    0.921355    11.00000   -1.20000
AFIX   0
C4    1    0.551289    0.537305    0.782556    11.00000    0.01254    0.02335 =
         0.02475    0.00075   -0.00231   -0.00028
C5    1    0.510166    0.443212    0.831990    11.00000    0.01860    0.02026 =
         0.02176    0.00047   -0.00161    0.00064
AFIX  23
H5A   2    0.489350    0.455068    0.907022    11.00000   -1.20000
H5B   2    0.596923    0.397615    0.839120    11.00000   -1.20000
AFIX   0
C6    1    0.368466    0.398975    0.757513    11.00000    0.01752    0.01603 =
         0.01925   -0.00091    0.00052   -0.00007
AFIX  23
H6A   2    0.334934    0.341865    0.794819    11.00000   -1.20000
H6B   2    0.394881    0.377218    0.686942    11.00000   -1.20000
AFIX   0
C7    1    0.236929    0.472613    0.732562    11.00000    0.01643    0.01525 =
         0.01222   -0.00136    0.00184   -0.00067
AFIX  13
H7    2    0.269504    0.526127    0.687815    11.00000   -1.20000
AFIX   0
C8    1    0.092175    0.428232    0.664750    11.00000    0.01673    0.01144 =
         0.01369    0.00036    0.00028    0.00093
C9    1   -0.039530    0.415872    0.706404    11.00000    0.01806    0.01632 =
         0.01376    0.00050    0.00247    0.00187
C10   1   -0.045737    0.444633    0.824303    11.00000    0.01867    0.02601 =
         0.01414   -0.00122    0.00349    0.00048
AFIX  23
H10A  2   -0.103821    0.395601    0.857438    11.00000   -1.20000
H10B  2   -0.099282    0.507259    0.823891    11.00000   -1.20000
AFIX   0
C11   1    0.114609    0.453206    0.893775    11.00000    0.02052    0.02541 =
         0.01339   -0.00066    0.00305   -0.00051
AFIX  23
H11A  2    0.110343    0.481755    0.966942    11.00000   -1.20000
H11B  2    0.161638    0.388390    0.906203    11.00000   -1.20000
AFIX   0
C12   1    0.095504    0.398824    0.555765    11.00000    0.01647    0.01317 =
         0.01504    0.00110    0.00320    0.00174
AFIX  43
H12   2    0.186039    0.407580    0.527380    11.00000   -1.20000
AFIX   0
C13   1   -0.031023    0.357411    0.489493    11.00000    0.01917    0.01310 =
         0.01187    0.00025    0.00139    0.00184
C14   1   -0.166620    0.347243    0.530630    11.00000    0.01590    0.01504 =
         0.01616    0.00072   -0.00039   -0.00047
C15   1   -0.169283    0.376307    0.637667    11.00000    0.01637    0.01803 =
         0.01667    0.00161    0.00361    0.00161
AFIX  43
H15   2   -0.260745    0.369384    0.665320    11.00000   -1.20000
AFIX   0
C16   1    0.103268    0.323923    0.344950    11.00000    0.02210    0.02477 =
         0.01732   -0.00355    0.00701   -0.00130
AFIX 137
H16A  2    0.177251    0.283597    0.394558    11.00000   -1.50000
H16B  2    0.143089    0.389830    0.344544    11.00000   -1.50000
H16C  2    0.086188    0.297363    0.269589    11.00000   -1.50000
AFIX   0
C17   1   -0.429681    0.301671    0.495556    11.00000    0.01683    0.03798 =
         0.02495   -0.00326    0.00302   -0.00490
AFIX 137
H17A  2   -0.418767    0.258164    0.559531    11.00000   -1.50000
H17B  2   -0.509120    0.276959    0.435304    11.00000   -1.50000
H17C  2   -0.458383    0.366160    0.517089    11.00000   -1.50000
AFIX   0
HKLF 4

REM
REM R1 =  0.0405 for    2965 Fo > 4sig(Fo)  and  0.0535 for all    3695 data
REM    201 parameters refined using      0 restraints

END

WGHT      0.0456      0.4795

REM Highest difference peak  0.355,  deepest hole -0.202,  1-sigma level  0.045
Q1    1   0.1629  0.4489  0.7029  11.00000  0.05    0.36
Q2    1   0.5418  0.5816  0.8193  11.00000  0.05    0.32
Q3    1  -0.0435  0.4327  0.7607  11.00000  0.05    0.32
Q4    1   0.0315  0.4531  0.8586  11.00000  0.05    0.30
Q5    1  -0.0928  0.3437  0.5140  11.00000  0.05    0.29
Q6    1   0.0396  0.3610  0.5337  11.00000  0.05    0.28
Q7    1   0.2928  0.6323  0.8381  11.00000  0.05    0.28
Q8    1   0.0155  0.4396  0.6811  11.00000  0.05    0.28
Q9    1   0.0929  0.4112  0.6127  11.00000  0.05    0.26
Q10   1   0.5367  0.4928  0.8219  11.00000  0.05    0.26
;
_shelx_res_checksum               88661
_shelx_hkl_file
;
  -1   0   0   -0.08    0.04
  -1   0   0   -0.11    0.04
  -2   0   0   92.73    1.50
  -2   0   0   95.95    1.45
  -2   0   0   95.96    1.49
   2   0   0   98.29    1.51
  -3   0   0    0.04    0.12
   3   0   0    0.07    0.12
  -3   0   0    0.06    0.10
  -4   0   0    9.31    0.45
   4   0   0    8.68    0.43
  -4   0   0    8.96    0.41
   5   0   0    0.06    0.14
  -5   0   0    0.11    0.14
  -5   0   0   -0.05    0.15
   6   0   0   36.93    1.12
  -6   0   0   35.40    1.11
  -6   0   0   35.75    1.03
  -7   0   0   -0.06    0.21
   7   0   0   -0.22    0.20
  -8   0   0    0.08    0.24
  -9   0   0   -0.04    0.25
 -10   0   0    0.48    0.31
 -11   0   0   -0.26    0.26
  -1  -1   0   70.43    1.09
  -1   1   0   70.37    1.07
   2  -1   0    4.60    0.24
  -2  -1   0    4.81    0.20
  -2  -1   0    5.01    0.26
  -2   1   0    4.52    0.23
  -2   1   0    5.09    0.25
   2   1   0    5.18    0.27
  -3  -1   0   83.16    1.52
   3  -1   0   86.83    1.50
  -3  -1   0   84.60    1.40
   3   1   0   82.52    1.51
  -3   1   0   85.11    1.44
  -3   1   0   85.04    1.50
  -4  -1   0    5.87    0.38
   4  -1   0    6.10    0.38
  -4   1   0    6.21    0.38
  -4   1   0    6.24    0.36
   4   1   0    6.19    0.39
   5  -1   0    6.59    0.44
  -5  -1   0    6.96    0.48
   5   1   0    5.82    0.43
  -5   1   0    7.72    0.43
  -5   1   0    8.24    0.49
  -6  -1   0   36.98    1.16
   6  -1   0   39.77    1.16
  -6   1   0   39.01    1.16
   6   1   0   39.10    1.17
  -6   1   0   37.63    1.06
  -7  -1   0   17.35    0.84
   7  -1   0   15.56    0.78
   7   1   0   17.78    0.86
  -7   1   0   18.34    0.78
  -7   1   0   17.12    0.83
  -8  -1   0   70.46    1.89
  -8   1   0   68.25    1.85
  -9  -1   0    0.45    0.30
  -9   1   0    0.04    0.24
 -10  -1   0    1.53    0.44
 -10   1   0    2.31    0.51
 -11  -1   0    0.14    0.31
 -11   1   0    0.16    0.33
   0  -2   0  407.84    5.69
   0   2   0  407.76    5.68
   1  -2   0  246.08    3.37
  -1  -2   0  247.18    3.41
   1   2   0  244.97    3.41
  -1   2   0  244.59    3.36
   2  -2   0   11.78    0.40
  -2  -2   0   11.32    0.42
   2   2   0   12.27    0.44
  -2   2   0   12.09    0.40
  -3  -2   0  267.15    3.93
  -3  -2   0  268.68    3.68
   3  -2   0  264.68    3.85
   3   2   0  266.38    3.92
  -3   2   0  269.19    3.77
  -4  -2   0    0.54    0.13
   4  -2   0    0.29    0.16
  -4  -2   0    0.46    0.17
   4   2   0    0.50    0.19
  -4   2   0    0.53    0.17
  -4   2   0    0.45    0.16
   5  -2   0   52.48    1.28
  -5  -2   0   54.17    1.36
   5   2   0   53.24    1.33
  -5   2   0   53.90    1.31
  -5   2   0   56.22    1.25
  -6  -2   0   20.55    0.87
   6  -2   0   21.52    0.84
  -6   2   0   21.94    0.80
   6   2   0   21.78    0.88
  -6   2   0   20.51    0.84
  -7  -2   0  112.06    2.45
   7   2   0  110.50    2.41
  -7   2   0  116.76    2.43
  -7   2   0  114.30    2.27
  -8  -2   0    4.60    0.60
  -8   2   0    5.47    0.61
  -8   2   0    5.53    0.56
  -9  -2   0   12.49    0.87
  -9   2   0   13.37    0.86
 -10  -2   0    0.87    0.39
 -10   2   0    0.46    0.31
 -11  -2   0    3.18    0.62
 -11   2   0    3.00    0.59
   0  -3   0   -0.01    0.11
   0   3   0    0.05    0.11
  -1  -3   0   60.86    1.15
   1  -3   0   60.76    1.12
  -1   3   0   59.20    1.10
   1   3   0   59.90    1.15
  -2  -3   0  133.93    2.20
   2  -3   0  139.83    2.16
  -2   3   0  134.74    2.14
   2   3   0  134.43    2.21
  -3  -3   0   57.88    1.26
  -3  -3   0   58.41    0.95
   3  -3   0   58.39    1.19
  -3   3   0   55.59    1.14
   3   3   0   55.81    1.24
  -3   3   0   56.55    1.19
  -4  -3   0    1.27    0.16
   4  -3   0    0.78    0.20
  -4  -3   0    0.63    0.21
  -4   3   0    1.02    0.21
   4   3   0    0.77    0.21
   5  -3   0    2.60    0.33
  -5  -3   0    1.89    0.31
  -5   3   0    1.87    0.28
   5   3   0    2.01    0.33
  -5   3   0    1.85    0.30
   6  -3   0   56.44    1.45
  -6  -3   0   57.67    1.54
  -6   3   0   58.64    1.41
   6   3   0   57.48    1.54
  -6   3   0   58.08    1.49
  -7  -3   0    4.58    0.55
   7   3   0    5.18    0.58
  -7   3   0    3.57    0.44
  -7   3   0    4.78    0.55
  -8  -3   0   17.82    0.94
  -8   3   0   15.66    0.86
  -8   3   0   15.54    0.79
  -9  -3   0    7.49    0.79
  -9   3   0    7.64    0.77
 -10  -3   0    0.05    0.30
 -10   3   0    0.21    0.31
 -11  -3   0    6.78    0.87
 -11   3   0    7.99    0.91
   0  -4   0  563.10    7.63
   0   4   0  563.19    7.62
  -1  -4   0  409.02    5.72
   1  -4   0  408.82    5.66
   1   4   0  408.46    5.72
  -1   4   0  407.54    5.66
  -2  -4   0    1.81    0.15
  -2  -4   0    1.52    0.24
   2  -4   0    1.78    0.24
  -2   4   0    1.68    0.23
   2   4   0    1.75    0.27
   3  -4   0   82.79    1.59
  -3  -4   0   83.55    1.28
  -3  -4   0   83.37    1.68
  -3   4   0   82.20    1.61
   3   4   0   85.02    1.70
  -4  -4   0    0.91    0.13
  -4  -4   0    1.07    0.24
   4  -4   0    0.64    0.19
  -4   4   0    1.04    0.21
  -4   4   0    1.05    0.22
   4   4   0    1.16    0.25
  -5  -4   0    0.14    0.10
  -5  -4   0    0.10    0.19
   5  -4   0    0.06    0.17
   5   4   0    0.02    0.18
  -5   4   0    0.12    0.18
  -5   4   0    0.24    0.18
  -6  -4   0   20.98    0.92
   6  -4   0   20.47    0.85
   6   4   0   20.56    0.92
  -6   4   0   19.07    0.85
  -6   4   0   19.36    0.79
  -7  -4   0    4.56    0.59
   7   4   0    5.43    0.62
  -7   4   0    4.38    0.54
  -7   4   0    3.99    0.47
  -8  -4   0    1.62    0.43
  -8   4   0    1.13    0.32
  -8   4   0    1.10    0.35
  -9  -4   0    3.12    0.57
  -9   4   0    2.57    0.49
 -10  -4   0    5.07    0.73
 -10   4   0    4.39    0.65
 -11  -4   0    0.02    0.32
 -11   4   0    0.39    0.37
   0  -5   0    0.12    0.16
   0   5   0    0.02    0.14
  -1  -5   0   37.25    0.98
   1  -5   0   34.62    0.92
   1   5   0   36.64    0.98
  -1   5   0   36.21    0.93
  -2  -5   0    8.45    0.47
   2  -5   0    8.21    0.44
   2   5   0    8.21    0.48
  -2   5   0    9.24    0.46
  -3  -5   0    9.13    0.29
  -3  -5   0    8.28    0.52
   3  -5   0    9.27    0.49
  -3   5   0    9.26    0.49
   3   5   0    9.70    0.55
  -4  -5   0   11.56    0.64
  -4  -5   0   12.97    0.36
   4  -5   0   14.36    0.62
   4   5   0   13.08    0.68
  -4   5   0   12.40    0.62
  -5  -5   0    2.06    0.38
  -5  -5   0    1.64    0.17
   5  -5   0    1.97    0.33
   5   5   0    1.72    0.38
  -5   5   0    1.92    0.33
  -5   5   0    2.26    0.35
   6  -5   0    4.22    0.48
  -6  -5   0    3.57    0.48
   6   5   0    5.25    0.59
  -6   5   0    4.41    0.49
  -6   5   0    4.70    0.49
  -7  -5   0   15.91    0.90
  -7   5   0   16.57    0.81
  -7   5   0   16.81    0.86
   7   5   0   18.00    0.96
  -8  -5   0    4.11    0.60
  -8   5   0    5.54    0.60
  -8   5   0    4.72    0.59
  -9  -5   0    3.57    0.59
  -9   5   0    3.48    0.57
 -10  -5   0    3.06    0.62
 -10   5   0    2.79    0.54
 -11  -5   0    3.40    0.69
 -11   5   0    2.87    0.58
   0  -6   0   85.02    1.75
   0   6   0   88.32    1.76
   1  -6   0   84.81    1.74
  -1  -6   0   87.25    1.79
   1   6   0   85.71    1.78
  -1   6   0   86.42    1.74
  -2  -6   0   40.83    1.15
   2  -6   0   39.89    1.09
  -2   6   0   42.02    1.11
   2   6   0   43.69    1.19
  -3  -6   0    0.00    0.07
  -3  -6   0   -0.13    0.14
   3  -6   0    0.25    0.17
   3   6   0   -0.05    0.17
  -3   6   0    0.04    0.15
  -4  -6   0    7.89    0.28
   4  -6   0    7.73    0.51
  -4  -6   0    6.90    0.55
  -4   6   0    8.71    0.55
   4   6   0    7.71    0.58
  -5  -6   0    0.94    0.32
   5  -6   0    1.11    0.29
  -5   6   0    1.44    0.33
   5   6   0    1.35    0.35
  -5   6   0    1.13    0.27
  -6  -6   0    7.17    0.71
   6  -6   0    7.96    0.58
   6   6   0    6.90    0.69
  -6   6   0    7.58    0.56
  -7  -6   0   13.41    0.86
   7   6   0   13.45    0.85
  -7   6   0   14.10    0.80
  -7   6   0   15.15    0.79
  -8  -6   0    6.30    0.76
  -8   6   0    5.82    0.67
  -8   6   0    5.55    0.60
  -9  -6   0   -0.46    0.26
  -9   6   0    0.11    0.31
 -10  -6   0    0.41    0.39
 -10   6   0    0.25    0.30
 -11  -6   0    4.00    0.75
 -11   6   0    3.36    0.65
   0  -7   0   -0.07    0.16
   0   7   0   -0.02    0.17
   1  -7   0    0.58    0.21
  -1  -7   0    0.94    0.27
   1   7   0    1.00    0.28
  -1   7   0    0.82    0.24
  -2  -7   0    6.70    0.60
   2  -7   0    5.09    0.42
   2   7   0    6.44    0.58
  -2   7   0    4.48    0.43
  -3  -7   0   27.60    0.65
   3  -7   0   28.52    0.97
  -3  -7   0   26.20    0.99
  -3   7   0   27.33    0.95
   3   7   0   26.69    1.01
   4  -7   0   45.75    1.30
  -4  -7   0   47.15    1.42
  -4  -7   0   46.03    0.89
  -4   7   0   46.32    1.32
   4   7   0   43.84    1.39
   5  -7   0   61.19    1.61
  -5  -7   0   61.48    1.75
  -5   7   0   64.82    1.67
  -5   7   0   62.27    1.59
   5   7   0   61.49    1.76
  -6  -7   0    8.30    0.79
  -6   7   0    9.05    0.63
   6   7   0    9.34    0.83
  -6   7   0    8.95    0.68
  -7  -7   0    3.54    0.56
   7   7   0    4.10    0.62
  -7   7   0    4.28    0.54
  -7   7   0    3.61    0.53
  -8  -7   0    0.14    0.30
  -8   7   0    0.19    0.28
  -8   7   0    0.06    0.24
  -9  -7   0    0.62    0.39
  -9   7   0    1.26    0.41
 -10  -7   0    8.61    0.99
 -10   7   0    7.31    0.86
   0  -8   0   17.94    0.81
   0   8   0   17.76    0.80
   1  -8   0    2.26    0.35
  -1  -8   0    2.42    0.38
  -1   8   0    2.16    0.36
   1   8   0    1.97    0.35
   2  -8   0  111.53    2.32
  -2  -8   0  110.53    2.38
  -2   8   0  112.03    2.30
   2   8   0  113.33    2.41
  -3  -8   0    0.06    0.22
   3  -8   0    0.09    0.20
   3   8   0   -0.20    0.20
  -3   8   0    0.07    0.23
   4  -8   0    3.41    0.47
  -4  -8   0    3.40    0.48
  -4   8   0    4.13    0.50
   4   8   0    3.02    0.49
   5  -8   0   32.28    1.17
  -5  -8   0   33.07    1.30
  -5   8   0   33.08    1.21
   5   8   0   32.95    1.31
  -6  -8   0   11.09    0.82
  -6   8   0    9.88    0.68
   6   8   0   12.17    0.88
  -6   8   0    8.77    0.70
  -7  -8   0   18.12    1.07
   7   8   0   18.27    1.06
  -7   8   0   18.25    0.94
  -8  -8   0    0.47    0.36
  -8   8   0    0.51    0.34
  -8   8   0    0.31    0.28
  -9  -8   0   -0.21    0.31
  -9   8   0    0.31    0.31
 -10  -8   0    0.54    0.46
 -10   8   0    0.67    0.39
   0  -9   0    0.28    0.24
   0   9   0    0.58    0.27
   1  -9   0    8.69    0.61
  -1  -9   0    7.65    0.63
   1   9   0    7.81    0.70
  -1   9   0    7.70    0.58
  -2  -9   0   88.38    2.13
   2  -9   0   86.60    2.06
   2   9   0   88.37    2.14
  -2   9   0   85.57    2.03
   3  -9   0   13.20    0.76
  -3  -9   0   12.96    0.79
  -3   9   0   11.89    0.74
   3   9   0   14.45    0.84
   4  -9   0    0.08    0.23
  -4  -9   0    0.27    0.29
   4   9   0    0.07    0.31
  -4   9   0   -0.06    0.20
   5  -9   0    9.81    0.70
  -5  -9   0    9.93    0.78
  -5   9   0    8.38    0.69
   5   9   0    9.39    0.88
  -6  -9   0   19.03    1.06
   6   9   0   18.49    1.07
  -6   9   0   19.71    1.01
  -6   9   0   18.85    0.95
  -7  -9   0   -0.01    0.28
  -7   9   0    0.03    0.27
   7   9   0    0.43    0.37
  -7   9   0   -0.14    0.23
  -8  -9   0    9.32    1.01
  -8   9   0   11.46    0.86
  -9  -9   0    0.88    0.49
  -9   9   0    0.01    0.29
 -10  -9   0    3.79    0.74
 -10   9   0    3.46    0.64
   0 -10   0    6.93    0.68
   0  10   0    6.59    0.65
   1 -10   0   -0.09    0.24
  -1 -10   0    0.24    0.25
  -1  10   0    0.01    0.26
   1  10   0    0.30    0.28
  -2 -10   0   38.93    1.39
   2 -10   0   38.91    1.36
  -2  10   0   37.26    1.32
   2  10   0   38.10    1.37
   3 -10   0   16.50    0.90
  -3 -10   0   16.81    0.95
  -3  10   0   19.04    0.94
   3  10   0   17.52    1.01
  -4 -10   0   -0.23    0.25
   4 -10   0    0.04    0.24
  -4  10   0    0.17    0.27
   4  10   0   -0.26    0.30
  -5 -10   0   19.27    1.09
   5 -10   0   18.54    1.06
   5  10   0   19.50    1.12
  -5  10   0   18.35    0.98
  -6 -10   0   17.04    1.06
  -6  10   0   15.63    0.91
   6  10   0   16.01    1.04
  -6  10   0   17.26    0.99
  -7 -10   0    8.58    0.91
  -7  10   0    6.98    0.76
   7  10   0    8.34    0.89
  -7  10   0    9.53    0.76
  -8 -10   0   -0.59    0.25
  -9 -10   0   17.85    1.25
  -9  10   0   21.94    1.20
   0 -11   0   -0.07    0.23
   0  11   0    0.12    0.26
   1 -11   0   22.34    1.08
  -1 -11   0   22.80    1.10
   1  11   0   21.57    1.09
  -1  11   0   20.67    1.05
  -2 -11   0    5.51    0.71
   2 -11   0    4.06    0.61
  -2  11   0    4.45    0.60
   2  11   0    4.43    0.65
  -3 -11   0   39.24    1.50
   3 -11   0   38.74    1.44
   3  11   0   41.68    1.55
  -3  11   0   39.50    1.43
   4 -11   0    1.37    0.39
  -4 -11   0    0.51    0.38
  -4  11   0    1.60    0.43
   4  11   0    0.76    0.43
  -5 -11   0    7.80    0.88
   5  11   0    5.62    0.77
  -5  11   0    7.13    0.76
  -6 -11   0   13.72    1.02
  -6  11   0   15.09    0.96
   6  11   0   13.63    1.06
  -7 -11   0    0.18    0.39
  -7  11   0    0.41    0.31
   7  11   0    0.32    0.45
  -7  11   0    0.61    0.36
  -8 -11   0   -0.03    0.38
  -9 -11   0    0.58    0.48
  -9  11   0    0.08    0.32
   0 -12   0    8.65    0.85
   0  12   0   10.12    0.81
  -1 -12   0    1.08    0.41
   1 -12   0    2.97    0.55
   1  12   0    2.75    0.55
  -1  12   0    2.38    0.53
  -2 -12   0    0.66    0.36
   2 -12   0   -0.04    0.30
  -2  12   0    0.29    0.31
   2  12   0   -0.20    0.29
   3 -12   0   15.92    0.98
  -3 -12   0   12.79    0.96
   3  12   0   19.49    1.13
  -3  12   0   14.51    0.94
   4 -12   0    5.92    0.75
  -4 -12   0    6.11    0.82
   4  12   0    7.47    0.87
  -4  12   0    6.02    0.71
  -5 -12   0    1.88    0.51
   5  12   0    0.80    0.42
  -5  12   0    1.72    0.47
  -6 -12   0    0.66    0.42
   6  12   0    1.08    0.53
  -6  12   0    1.40    0.44
  -7 -12   0    0.30    0.41
  -7  12   0   -0.03    0.28
  -7  12   0    0.21    0.32
   7  12   0    0.78    0.47
  -8 -12   0    0.60    0.45
  -8  12   0    0.08    0.33
   0 -13   0   -0.35    0.27
   0  13   0    0.24    0.36
   1 -13   0   22.99    1.21
  -1 -13   0   22.59    1.23
  -1  13   0   22.89    1.22
   1  13   0   24.54    1.27
   2 -13   0    1.52    0.47
  -2 -13   0    1.76    0.46
  -2  13   0    0.52    0.40
   2  13   0    1.27    0.43
   3 -13   0    1.90    0.52
  -3 -13   0    3.01    0.62
  -3  13   0    2.01    0.50
   3  13   0    2.60    0.56
  -4 -13   0    1.05    0.43
   4  13   0    0.28    0.35
  -4  13   0    1.01    0.43
  -5 -13   0    1.19    0.51
   5  13   0   -0.27    0.40
  -5  13   0    0.81    0.42
  -6 -13   0    0.72    0.47
  -6  13   0    0.15    0.37
   6  13   0    0.71    0.51
  -7 -13   0   10.48    1.19
  -7  13   0    9.55    0.97
  -7  13   0   12.79    1.04
   7  13   0   10.65    1.18
  -8 -13   0   -0.45    0.40
  -8  13   0   -0.50    0.28
   0 -14   0   14.04    1.02
   0  14   0   13.02    1.01
  -1 -14   0    0.25    0.36
   1 -14   0    0.03    0.31
  -1  14   0    0.61    0.38
   1  14   0    0.11    0.37
   2 -14   0    0.33    0.36
  -2 -14   0    1.24    0.49
  -2  14   0    0.80    0.37
   2  14   0    1.00    0.46
   3 -14   0    1.93    0.48
  -3 -14   0    2.20    0.55
  -3  14   0    1.85    0.49
   3  14   0    1.29    0.48
  -4 -14   0    6.01    0.85
  -4  14   0    5.07    0.76
   4  14   0    5.74    0.88
  -5 -14   0    1.37    0.52
  -5  14   0    1.21    0.49
   5  14   0    0.80    0.45
  -6 -14   0   12.07    1.20
   6  14   0   10.82    1.14
  -6  14   0   11.05    1.07
  -7 -14   0    1.89    0.62
  -7  14   0    2.74    0.64
  -7  14   0    1.73    0.53
   7  14   0    1.52    0.64
   0 -15   0    0.39    0.34
   0  15   0    0.02    0.30
  -1 -15   0    1.37    0.51
   1 -15   0    0.30    0.40
   1  15   0   -0.05    0.37
  -1  15   0    0.70    0.45
   2 -15   0    0.77    0.43
  -2 -15   0    0.78    0.44
   2  15   0    0.55    0.44
  -2  15   0    1.33    0.50
  -3 -15   0    9.77    1.09
  -3  15   0    5.95    0.79
   3  15   0    7.64    0.99
  -4 -15   0    2.70    0.69
  -4  15   0    1.42    0.52
   4  15   0    2.34    0.65
  -5 -15   0    0.53    0.51
   5  15   0    1.75    0.64
  -5  15   0    0.84    0.46
  -6 -15   0    0.52    0.54
  -6  15   0    1.01    0.50
   6  15   0    1.18    0.57
   0 -16   0    1.56    0.53
   0  16   0    0.90    0.48
  -1 -16   0    7.58    0.94
   1 -16   0    8.83    1.00
  -1  16   0    6.37    0.89
   1  16   0    6.54    0.92
  -2 -16   0    1.53    0.54
   2 -16   0    2.43    0.64
   2  16   0    1.92    0.65
  -2  16   0    1.98    0.59
  -3 -16   0    4.01    0.79
  -3  16   0    3.09    0.69
   3  16   0    3.83    0.78
  -4 -16   0    3.54    0.78
  -4  16   0    3.38    0.74
   4  16   0    5.21    0.91
  -5 -16   0   -0.01    0.44
  -5  16   0    0.39    0.45
   5  16   0   -0.54    0.41
   0 -17   0   -0.12    0.41
   0  17   0    0.47    0.50
  -1 -17   0   -0.15    0.37
   1 -17   0    0.20    0.45
  -1  17   0    0.83    0.50
   1  17   0    0.53    0.44
  -2 -17   0   -0.13    0.43
   2  17   0   -0.09    0.47
  -2  17   0   -0.28    0.37
  -3 -17   0    1.00    0.60
  -3  17   0    0.54    0.46
   3  17   0    0.84    0.55
  -4 -17   0    1.25    0.61
   4  17   0    1.22    0.66
  -4  17   0    1.90    0.63
   0 -18   0    0.26    0.50
   0  18   0    1.15    0.55
  -1 -18   0    1.47    0.62
   1 -18   0    1.48    0.61
  -1  18   0    1.38    0.60
   1  18   0    1.52    0.67
  -2 -18   0    0.83    0.57
   2  18   0    0.58    0.58
  -2  18   0    0.40    0.53
 -11   0   1    2.01    0.54
 -10   0   1   -0.10    0.27
  -9   0   1    9.85    0.79
  -8   0   1    0.00    0.25
  -7   0   1    1.66    0.38
   7   0  -1    1.70    0.38
   6   0  -1    0.30    0.20
  -6   0   1    0.18    0.19
   5   0  -1   31.05    0.97
  -5   0   1   30.78    0.97
  -4   0   1   -0.05    0.09
   4   0  -1    0.11    0.14
  -4   0   1   -0.08    0.12
  -3   0   1   98.28    1.48
   3   0  -1   97.99    1.72
  -3   0   1   96.44    1.72
  -2   0   1   -0.36    0.06
  -2   0   1   -0.34    0.11
   2   0  -1   -0.26    0.13
  -1   0   1  987.05   13.76
   1   0  -1 1000.00   13.77
   0   0   1   -0.14    0.04
   0   0  -1   -0.12    0.03
  -1   0  -1    0.02    0.07
  -1   0  -1    0.04    0.06
  -2   0  -1   -0.11    0.07
  -2   0  -1   -0.12    0.09
  -2   0  -1    0.04    0.11
  -3   0  -1  691.44    9.08
   3   0   1  697.29    9.70
  -3   0  -1  682.05   10.34
  -3   0  -1  686.92    9.84
  -4   0  -1    0.20    0.13
   4   0   1    0.15    0.15
  -4   0  -1    0.06    0.14
  -4   0  -1    0.14    0.13
  -5   0  -1    8.95    0.50
   5   0   1    8.21    0.47
  -5   0  -1    8.44    0.49
  -5   0  -1    8.61    0.48
  -6   0  -1    0.33    0.21
   6   0   1    0.13    0.18
  -6   0  -1    0.08    0.18
  -7   0  -1  186.86    3.35
  -8   0  -1   -0.18    0.21
  -9   0  -1   18.57    0.98
 -10   0  -1    0.26    0.30
 -11   0  -1    3.78    0.64
 -11  -1   1    0.25    0.34
 -11   1   1   -0.36    0.29
 -10  -1   1    2.05    0.49
 -10   1   1    2.11    0.52
  -9  -1   1    0.18    0.28
  -9   1   1    0.10    0.28
  -8  -1   1   61.77    1.80
   8   1  -1   63.17    1.80
  -8   1   1   60.91    1.78
  -7  -1   1   47.15    1.45
   7  -1  -1   47.06    1.43
  -7   1   1   50.17    1.24
  -7   1   1   46.49    1.44
   7   1  -1   43.80    1.41
  -6  -1   1    8.64    0.59
   6  -1  -1   10.76    0.63
   6   1  -1   10.35    0.64
  -6   1   1    9.51    0.60
  -6   1   1    9.28    0.48
   5  -1  -1   22.82    0.82
  -5  -1   1   22.51    0.83
   5   1  -1   23.13    0.85
  -5   1   1   22.10    0.82
  -5   1   1   23.10    0.67
  -4  -1   1    0.06    0.13
   4  -1  -1    0.03    0.14
  -4   1   1   -0.03    0.12
   4   1  -1   -0.03    0.14
  -4   1   1    0.11    0.10
   3  -1  -1    3.95    0.31
  -3  -1   1    4.62    0.32
  -3   1   1    4.37    0.32
   3   1  -1    4.30    0.33
  -3   1   1    4.05    0.22
   2  -1  -1  125.15    1.99
  -2  -1   1  130.08    2.02
  -2   1   1  128.20    1.77
   2   1  -1  130.62    2.02
   1  -1  -1   90.02    1.36
  -1  -1   1   86.41    1.35
  -1   1   1   88.21    1.35
   1   1  -1   87.82    1.36
   0  -1  -1    3.87    0.18
  -1  -1  -1    4.10    0.17
  -1  -1  -1    3.82    0.19
  -1   1  -1    3.82    0.13
  -1   1  -1    3.99    0.21
  -1   1  -1    4.17    0.21
  -2  -1  -1    0.20    0.11
  -2  -1  -1    0.08    0.10
  -2  -1  -1    0.08    0.12
  -2   1  -1   -0.02    0.10
  -2   1  -1    0.07    0.09
  -2   1  -1    0.03    0.12
  -3  -1  -1   53.84    1.08
  -3  -1  -1   53.06    1.07
   3  -1   1   53.40    1.02
  -3  -1  -1   53.56    1.12
   3   1   1   53.91    1.06
  -3   1  -1   53.68    1.03
  -3   1  -1   56.39    1.14
  -3   1  -1   54.80    1.17
  -4  -1  -1  107.41    1.91
  -4  -1  -1  108.83    1.91
   4  -1   1  107.06    1.85
  -4  -1  -1  108.72    1.95
   4   1   1  109.21    1.91
  -4   1  -1  106.45    1.86
  -4   1  -1  105.39    2.01
  -4   1  -1  108.20    1.96
  -5  -1  -1    6.90    0.44
  -5  -1  -1    6.82    0.42
   5  -1   1    6.47    0.40
  -5   1  -1    6.60    0.43
  -5   1  -1    6.70    0.46
   5   1   1    6.36    0.44
  -6  -1  -1   14.36    0.67
   6  -1   1   13.20    0.63
   6   1   1   13.45    0.66
  -6   1  -1   13.17    0.66
  -6   1  -1   13.34    0.65
  -7  -1  -1   58.13    1.57
  -7   1  -1   59.07    1.57
  -7   1  -1   62.56    1.59
  -8  -1  -1    5.97    0.63
  -8   1  -1    4.71    0.56
  -8   1  -1    6.90    0.66
  -9  -1  -1    5.85    0.68
  -9   1  -1    6.31    0.68
 -10  -1  -1    0.36    0.31
 -10   1  -1    0.25    0.28
 -11  -1  -1   -0.31    0.28
 -11   1  -1    0.00    0.30
 -11  -2   1    0.12    0.35
 -11   2   1    0.81    0.39
 -10  -2   1    0.44    0.33
 -10   2   1   -0.23    0.24
  -9  -2   1    0.94    0.37
  -9   2   1    0.60    0.32
  -8  -2   1   69.66    1.94
  -8   2   1   68.81    1.91
   8   2  -1   65.99    1.88
   7  -2  -1   70.61    1.80
  -7  -2   1   69.58    1.84
   7   2  -1   67.96    1.82
  -7   2   1   70.26    1.56
  -7   2   1   71.41    1.82
   6  -2  -1    0.22    0.21
  -6  -2   1    0.08    0.21
  -6   2   1    0.18    0.21
  -6   2   1    0.19    0.17
   6   2  -1   -0.12    0.21
  -5  -2   1    1.44    0.31
   5  -2  -1    1.10    0.26
  -5   2   1    1.35    0.22
  -5   2   1    1.42    0.30
   5   2  -1    1.17    0.28
   4  -2  -1   23.51    0.76
  -4  -2   1   23.10    0.79
  -4   2   1   23.95    0.63
   4   2  -1   23.21    0.79
  -4   2   1   23.80    0.77
  -3  -2   1   80.72    1.52
   3  -2  -1   75.07    1.45
  -3   2   1   75.65    1.27
   3   2  -1   77.99    1.50
  -3   2   1   72.61    1.45
  -2  -2   1    0.20    0.14
   2  -2  -1    0.06    0.13
  -2   2   1   -0.01    0.12
   2   2  -1    0.09    0.14
   1  -2  -1   17.49    0.47
  -1  -2   1   16.62    0.46
  -1   2   1   17.19    0.46
   1   2  -1   16.50    0.46
   0  -2  -1    0.28    0.10
   0   2  -1    0.11    0.08
   0   2  -1    0.20    0.09
   0   2   1    0.15    0.10
  -1  -2  -1   78.25    1.23
  -1  -2  -1   75.92    1.27
  -1   2  -1   79.06    1.19
   1   2   1   75.51    1.27
  -1   2  -1   78.21    1.33
  -2  -2  -1   17.64    0.51
  -2  -2  -1   18.19    0.47
  -2   2  -1   18.00    0.46
   2   2   1   17.42    0.51
  -2   2  -1   17.30    0.56
  -2   2  -1   17.65    0.53
   3  -2   1  214.49    3.10
  -3  -2  -1  211.43    3.20
  -3  -2  -1  217.04    3.13
  -3   2  -1  212.44    3.21
   3   2   1  216.27    3.21
  -3   2  -1  211.42    3.11
  -3   2  -1  210.46    3.35
   4  -2   1   15.35    0.55
  -4  -2  -1   16.67    0.62
  -4  -2  -1   16.74    0.56
  -4   2  -1   17.20    0.59
   4   2   1   17.66    0.63
  -4   2  -1   16.78    0.63
  -5  -2  -1   28.64    0.84
  -5  -2  -1   28.77    0.92
   5  -2   1   31.19    0.88
  -5   2  -1   29.03    0.92
   5   2   1   29.72    0.92
  -5   2  -1   31.07    0.90
  -6  -2  -1   18.73    0.71
   6  -2   1   17.23    0.72
  -6  -2  -1   20.08    0.82
  -6   2  -1   18.52    0.75
   6   2   1   17.90    0.78
  -6   2  -1   18.03    0.77
  -7  -2  -1    9.54    0.64
  -7   2  -1    8.28    0.59
  -7   2  -1    7.38    0.58
  -8  -2  -1   56.32    1.65
  -8   2  -1   54.55    1.60
  -8   2  -1   58.37    1.63
  -9  -2  -1    5.04    0.65
  -9   2  -1    4.87    0.61
  -9   2  -1    3.39    0.55
 -10  -2  -1    0.31    0.32
 -10   2  -1    0.71    0.34
 -11  -2  -1    0.07    0.34
 -11   2  -1   -0.28    0.27
 -11  -3   1    0.02    0.33
 -11   3   1    0.28    0.32
 -10  -3   1    0.04    0.29
 -10   3   1   -0.08    0.28
  -9  -3   1    0.08    0.28
  -9   3   1   -0.16    0.25
  -8  -3   1    0.30    0.26
   8   3  -1    0.22    0.29
  -8   3   1    0.50    0.29
   7  -3  -1    0.34    0.27
  -7  -3   1    0.00    0.25
  -7   3   1    0.19    0.18
  -7   3   1    0.18    0.23
   7   3  -1    0.11    0.26
   6  -3  -1   28.28    1.02
  -6  -3   1   29.18    1.08
   6   3  -1   27.74    1.05
  -6   3   1   27.83    0.86
  -6   3   1   29.04    1.05
  -5  -3   1  100.70    2.13
   5  -3  -1  105.40    2.09
   5   3  -1  101.88    2.13
  -5   3   1  105.24    2.10
  -5   3   1  106.50    1.88
   4  -3  -1   40.70    1.08
  -4  -3   1   43.21    1.15
  -4   3   1   42.39    1.11
   4   3  -1   41.50    1.13
  -4   3   1   42.16    0.94
   3  -3  -1   21.88    0.69
  -3  -3   1   22.45    0.73
  -3   3   1   20.19    0.67
   3   3  -1   22.23    0.73
  -2  -3   1  106.22    1.86
   2  -3  -1  108.45    1.84
  -2   3   1  105.21    1.82
   2   3  -1  108.76    1.87
  -1  -3   1   41.63    0.89
   1   3  -1   40.99    0.89
   0  -3  -1  638.93    8.50
   0  -3   1  649.16    9.40
   0   3   1  617.23    8.72
   0   3  -1  658.85    9.48
  -1  -3  -1  693.76   10.60
   1  -3   1  714.88   10.00
  -1   3  -1  696.66    9.46
   1   3   1  685.40    9.53
  -2  -3  -1  618.10    8.97
   2  -3   1  627.75    8.90
  -2  -3  -1  603.30    8.69
   2   3   1  610.52    8.29
  -2   3  -1  625.54    8.87
  -3  -3  -1    2.19    0.21
  -3  -3  -1    2.08    0.26
   3  -3   1    2.60    0.25
  -3   3  -1    2.72    0.30
   3   3   1    2.01    0.26
  -3   3  -1    1.75    0.22
   4  -3   1   28.16    0.78
  -4  -3  -1   29.22    0.74
  -4  -3  -1   29.69    0.89
  -4   3  -1   29.83    0.89
   4   3   1   28.85    0.88
  -4   3  -1   28.50    0.80
  -5  -3  -1    2.02    0.33
   5  -3   1    2.51    0.32
  -5  -3  -1    2.31    0.27
  -5   3  -1    2.04    0.30
  -5   3  -1    2.48    0.34
   5   3   1    3.23    0.40
  -6  -3  -1    1.76    0.26
   6  -3   1    1.46    0.29
  -6  -3  -1    1.94    0.35
  -6   3  -1    1.70    0.31
   6   3   1    2.24    0.39
  -6   3  -1    1.28    0.30
  -7  -3  -1   63.77    1.70
  -7   3  -1   60.24    1.61
  -7   3  -1   61.74    1.59
  -8  -3  -1   42.30    1.45
  -8   3  -1   42.36    1.39
  -8   3  -1   43.95    1.42
  -9  -3  -1   19.08    1.05
  -9   3  -1   20.33    1.02
 -10  -3  -1    0.18    0.29
 -10   3  -1    0.11    0.25
 -11  -3  -1    0.57    0.40
 -11   3  -1    0.48    0.36
 -11  -4   1    0.23    0.36
 -11   4   1    0.23    0.35
 -10  -4   1    0.20    0.34
 -10   4   1    0.79    0.37
  -9  -4   1    0.64    0.35
  -9   4   1    0.05    0.28
  -8  -4   1    5.04    0.66
   8   4  -1    4.52    0.65
  -8   4   1    6.10    0.68
   7  -4  -1    4.83    0.56
  -7  -4   1    5.95    0.65
   7   4  -1    4.67    0.57
  -7   4   1    5.39    0.61
  -7   4   1    5.99    0.48
  -6  -4   1    0.54    0.28
   6  -4  -1    0.68    0.27
  -6   4   1    0.84    0.29
   6   4  -1    1.04    0.33
  -6   4   1    0.53    0.20
  -5  -4   1    4.76    0.49
   5  -4  -1    4.33    0.45
  -5   4   1    5.41    0.39
   5   4  -1    4.12    0.45
   4  -4  -1    3.87    0.39
  -4  -4   1    4.66    0.45
  -4   4   1    4.67    0.38
   4   4  -1    4.22    0.43
  -4   4   1    5.00    0.33
  -3  -4   1   45.96    1.17
   3  -4  -1   45.55    1.11
  -3   4   1   46.20    1.12
   3   4  -1   45.70    1.17
   2  -4  -1  128.56    2.18
  -2  -4   1  126.74    2.19
   2   4  -1  123.56    2.18
  -2   4   1  125.66    2.15
  -1  -4   1  260.61    3.82
   1  -4  -1  256.78    3.81
  -1   4   1  253.58    3.79
   1   4  -1  261.98    3.82
   0  -4  -1  667.42    8.85
   0  -4   1  651.43    8.78
   0   4   1  654.03    8.83
   0   4  -1  655.60    8.79
  -1  -4  -1  303.02    4.46
   1  -4   1  313.41    4.39
  -1   4  -1  310.71    4.38
   1   4   1  311.98    4.48
   2  -4   1   65.67    1.25
  -2  -4  -1   62.75    1.14
  -2  -4  -1   65.40    1.35
   2   4   1   62.79    1.34
  -2   4  -1   65.82    1.25
  -3  -4  -1   71.44    1.27
  -3  -4  -1   72.14    1.52
   3  -4   1   74.24    1.40
  -3   4  -1   71.04    1.48
   3   4   1   70.41    1.51
  -3   4  -1   72.98    1.41
   4  -4   1    8.21    0.43
  -4  -4  -1    8.11    0.36
  -4  -4  -1    7.52    0.49
   4   4   1    7.73    0.48
  -4   4  -1    7.90    0.45
  -4   4  -1    7.85    0.48
  -5  -4  -1    0.12    0.13
  -5  -4  -1   -0.23    0.18
   5  -4   1    0.12    0.17
   5   4   1    0.44    0.24
  -5   4  -1    0.00    0.17
  -5   4  -1    0.44    0.20
  -6  -4  -1    1.48    0.33
  -6  -4  -1    1.62    0.25
   6   4   1    1.46    0.35
  -6   4  -1    1.62    0.33
  -6   4  -1    1.97    0.34
  -7  -4  -1   11.83    0.75
  -7   4  -1   11.83    0.69
  -7   4  -1   11.24    0.70
  -8  -4  -1   46.05    1.55
  -8   4  -1   47.14    1.50
  -8   4  -1   47.80    1.47
  -9  -4  -1    2.81    0.53
  -9   4  -1    2.56    0.48
 -10  -4  -1    1.18    0.40
 -10   4  -1    1.24    0.39
 -11  -4  -1    2.35    0.56
 -11   4  -1    1.82    0.48
 -11  -5   1    2.66    0.64
 -11   5   1    2.70    0.58
 -10  -5   1    0.30    0.34
 -10   5   1    0.13    0.30
  -9  -5   1    0.37    0.33
  -9   5   1    0.73    0.37
  -8  -5   1    3.45    0.58
  -8   5   1    3.49    0.54
   8   5  -1    3.54    0.58
   7  -5  -1  132.06    2.77
  -7  -5   1  131.74    2.92
  -7   5   1  132.74    2.54
  -7   5   1  131.57    2.82
   7   5  -1  136.80    2.95
  -6  -5   1    0.67    0.30
   6  -5  -1    0.85    0.29
  -6   5   1    0.94    0.25
   6   5  -1    0.42    0.30
  -6   5   1    0.83    0.29
  -5  -5   1   94.33    2.13
   5  -5  -1   93.99    2.03
  -5   5   1   92.78    2.04
  -5   5   1   93.95    1.85
   5   5  -1   94.91    2.15
  -4  -5   1   44.32    1.26
   4  -5  -1   40.77    1.15
  -4   5   1   41.61    1.17
  -3  -5   1    2.37    0.35
   3  -5  -1    3.66    0.40
  -3   5   1    3.30    0.38
   3   5  -1    2.57    0.36
  -2  -5   1    1.81    0.29
   2  -5  -1    1.95    0.30
  -2   5   1    1.29    0.24
   2   5  -1    1.63    0.28
  -1  -5   1   55.20    1.24
   1  -5  -1   57.38    1.26
  -1   5   1   53.79    1.22
   1   5  -1   54.76    1.25
   0  -5   1   84.70    1.62
   0  -5  -1   86.31    1.67
   0   5  -1   85.42    1.62
   0   5   1   83.91    1.65
  -1  -5  -1  147.17    2.50
   1  -5   1  144.77    2.41
  -1   5  -1  147.27    2.41
   1   5   1  145.83    2.49
   2  -5   1   40.95    1.00
  -2  -5  -1   39.30    1.06
  -2  -5  -1   43.26    0.89
  -2   5  -1   41.20    1.00
   2   5   1   41.02    1.08
   3  -5   1   49.62    1.15
  -3  -5  -1   49.00    0.99
  -3  -5  -1   51.17    1.29
   3   5   1   49.63    1.28
  -3   5  -1   50.15    1.17
  -4  -5  -1   49.65    1.01
   4  -5   1   49.27    1.19
  -4  -5  -1   49.65    1.33
  -4   5  -1   47.19    1.19
   4   5   1   48.46    1.32
  -4   5  -1   51.88    1.30
  -5  -5  -1   23.19    0.67
   5  -5   1   22.57    0.81
  -5  -5  -1   22.69    0.92
   5   5   1   24.43    0.96
  -5   5  -1   24.30    0.87
  -5   5  -1   22.03    0.87
  -6  -5  -1   28.62    1.11
   6   5   1   31.79    1.16
  -6   5  -1   29.13    1.02
  -6   5  -1   29.10    1.06
  -7  -5  -1    0.90    0.32
  -7   5  -1    1.36    0.33
  -7   5  -1    1.12    0.32
  -8  -5  -1    4.37    0.63
  -8   5  -1    4.54    0.56
  -8   5  -1    5.41    0.61
  -9  -5  -1    1.64    0.45
  -9   5  -1    1.41    0.39
 -10  -5  -1    8.27    0.93
 -10   5  -1    7.35    0.81
 -11  -5  -1    3.81    0.71
 -11   5  -1    2.80    0.53
 -11  -6   1    0.65    0.47
 -11   6   1    0.47    0.38
 -10  -6   1    0.45    0.41
 -10   6   1    0.96    0.39
  -9  -6   1   -0.21    0.26
  -9   6   1    0.18    0.28
  -8  -6   1    1.60    0.45
   8   6  -1    2.97    0.53
  -8   6   1    2.59    0.49
  -7  -6   1  106.75    2.58
  -7   6   1  106.61    2.23
   7   6  -1  103.86    2.57
  -7   6   1  103.06    2.43
   6  -6  -1    8.99    0.64
  -6  -6   1    6.95    0.69
   6   6  -1    7.51    0.72
  -6   6   1    7.63    0.70
  -6   6   1    8.87    0.56
   5  -6  -1   13.56    0.72
  -5  -6   1   13.69    0.78
  -5   6   1   13.07    0.72
  -5   6   1   13.81    0.64
   5   6  -1   12.62    0.78
  -4  -6   1  106.17    2.26
   4  -6  -1  107.45    2.18
   4   6  -1  101.72    2.25
  -4   6   1  108.76    2.21
   3  -6  -1    0.25    0.17
  -3  -6   1    0.31    0.20
   3   6  -1    0.40    0.21
  -3   6   1    0.53    0.22
  -2  -6   1    0.08    0.17
   2  -6  -1    0.08    0.14
   2   6  -1    0.49    0.23
  -2   6   1   -0.11    0.13
   1  -6  -1   22.97    0.80
  -1  -6   1   23.22    0.80
   1   6  -1   22.79    0.82
  -1   6   1   22.70    0.79
   0  -6  -1   12.98    0.60
   0  -6   1   13.24    0.58
   0   6   1   13.78    0.61
   0   6  -1   13.99    0.60
  -1  -6  -1   -0.03    0.18
   1  -6   1    0.49    0.19
   1   6   1    0.23    0.19
  -1   6  -1    0.25    0.17
  -2  -6  -1   10.02    0.57
   2  -6   1    9.54    0.50
   2   6   1   10.82    0.60
  -2   6  -1   10.35    0.52
  -3  -6  -1   48.89    1.32
   3  -6   1   49.89    1.22
  -3  -6  -1   48.43    1.01
   3   6   1   47.85    1.32
  -3   6  -1   47.42    1.21
  -4  -6  -1   28.64    1.04
  -4  -6  -1   29.11    0.72
   4  -6   1   28.83    0.92
  -4   6  -1   28.38    0.98
  -4   6  -1   29.28    0.95
   4   6   1   28.36    1.04
   5  -6   1   12.83    0.64
  -5  -6  -1   12.45    0.50
  -5  -6  -1   14.44    0.78
  -5   6  -1   12.71    0.69
  -5   6  -1   12.55    0.66
   5   6   1   12.16    0.74
  -6  -6  -1   14.03    0.82
   6   6   1   13.83    0.83
  -6   6  -1   14.34    0.78
  -7  -6  -1    4.53    0.60
  -7   6  -1    4.18    0.53
  -7   6  -1    3.72    0.50
  -8  -6  -1   21.22    1.11
  -8   6  -1   19.60    1.00
  -8   6  -1   20.99    1.01
  -9  -6  -1   25.61    1.28
  -9   6  -1   28.42    1.23
 -10  -6  -1    7.24    0.88
 -10   6  -1    6.02    0.74
 -10  -7   1    0.13    0.36
 -10   7   1    0.30    0.36
  -9  -7   1    0.01    0.34
  -9   7   1    0.39    0.35
  -8  -7   1    2.71    0.57
   8   7  -1    2.99    0.56
  -8   7   1    3.42    0.55
  -7  -7   1    2.11    0.47
  -7   7   1    2.01    0.45
  -7   7   1    2.08    0.39
   7   7  -1    3.00    0.57
   6  -7  -1  104.91    2.41
  -6  -7   1  114.38    2.64
  -6   7   1  112.82    2.51
  -6   7   1  111.01    2.29
   6   7  -1  107.50    2.60
  -5  -7   1    1.12    0.33
   5  -7  -1    0.96    0.31
  -5   7   1    1.22    0.33
   5   7  -1    1.12    0.34
  -4  -7   1   -0.05    0.20
   4  -7  -1    0.60    0.23
   4   7  -1    0.29    0.25
  -4   7   1    0.20    0.20
   3  -7  -1   31.36    1.06
  -3  -7   1   33.62    1.14
  -3   7   1   31.83    1.07
   3   7  -1   33.08    1.15
  -2  -7   1   13.80    0.68
   2  -7  -1   14.75    0.70
  -2   7   1   13.56    0.68
   2   7  -1   13.25    0.69
   1  -7  -1   60.37    1.48
  -1  -7   1   60.28    1.48
   1   7  -1   59.86    1.49
  -1   7   1   59.28    1.47
   0  -7   1   14.97    0.69
   0  -7  -1   16.69    0.75
   0   7   1   15.60    0.72
   0   7  -1   16.53    0.72
   1  -7   1   29.20    0.94
  -1  -7  -1   27.48    0.97
   1   7   1   28.36    0.98
  -1   7  -1   28.89    0.93
   2  -7   1   41.48    1.16
  -2  -7  -1   42.40    1.25
  -2   7  -1   44.47    1.19
   2   7   1   40.95    1.23
  -3  -7  -1   20.20    0.87
  -3  -7  -1   18.81    0.59
   3  -7   1   18.27    0.76
   3   7   1   18.93    0.87
  -3   7  -1   20.36    0.79
   4  -7   1    2.88    0.38
  -4  -7  -1    2.83    0.27
  -4  -7  -1    3.44    0.47
   4   7   1    2.79    0.44
  -4   7  -1    3.16    0.41
   5  -7   1   62.27    1.56
  -5  -7  -1   61.23    1.72
  -5   7  -1   59.71    1.58
  -5   7  -1   62.04    1.64
   5   7   1   60.05    1.72
  -6  -7  -1    3.55    0.55
  -6   7  -1    2.12    0.41
  -6   7  -1    1.63    0.35
   6   7   1    2.76    0.51
  -7  -7  -1    0.96    0.37
  -7   7  -1    0.67    0.32
  -7   7  -1    0.78    0.29
  -8  -7  -1    0.15    0.29
  -8   7  -1   -0.08    0.24
  -8   7  -1    0.57    0.32
  -9  -7  -1    0.89    0.42
  -9   7  -1    0.69    0.34
 -10  -7  -1   18.63    1.23
 -10   7  -1   20.25    1.11
 -10  -8   1    1.77    0.56
 -10   8   1    1.88    0.52
  -9  -8   1    1.27    0.51
  -9   8   1    0.97    0.42
  -8  -8   1    6.74    0.86
  -8   8   1    5.96    0.75
   8   8  -1    7.32    0.89
  -7  -8   1    2.32    0.51
  -7   8   1    2.62    0.51
   7   8  -1    1.29    0.47
  -7   8   1    2.30    0.41
  -6  -8   1    1.07    0.39
   6  -8  -1    1.11    0.36
  -6   8   1    0.56    0.26
  -6   8   1    1.42    0.37
   6   8  -1    0.49    0.36
  -5  -8   1    6.17    0.69
   5  -8  -1    5.37    0.59
   5   8  -1    4.68    0.62
  -5   8   1    4.97    0.58
   4  -8  -1   72.50    1.83
  -4  -8   1   72.50    1.93
  -4   8   1   68.21    1.80
   4   8  -1   71.04    1.92
  -3  -8   1    4.02    0.51
   3  -8  -1    2.98    0.43
   3   8  -1    3.46    0.50
  -3   8   1    3.43    0.44
   2  -8  -1    0.25    0.21
  -2  -8   1    0.43    0.25
  -2   8   1    0.59    0.25
   2   8  -1    0.11    0.25
   1  -8  -1    8.19    0.58
  -1  -8   1    7.23    0.54
  -1   8   1    7.20    0.57
   1   8  -1    6.85    0.54
   0  -8  -1  127.81    2.54
   0  -8   1  120.74    2.45
   0   8  -1  122.08    2.46
   0   8   1  132.72    2.55
   1  -8   1    0.18    0.18
  -1  -8  -1    0.21    0.22
  -1   8  -1   -0.09    0.17
   1   8   1   -0.01    0.18
   2  -8   1  175.62    3.17
  -2  -8  -1  175.65    3.28
  -2   8  -1  180.13    3.19
   2   8   1  182.11    3.32
  -3  -8  -1    0.70    0.29
  -3  -8  -1    0.28    0.15
   3  -8   1    0.30    0.21
   3   8   1    0.43    0.29
  -3   8  -1   -0.04    0.20
  -4  -8  -1    8.40    0.67
   4  -8   1    7.75    0.56
   4   8   1    7.08    0.71
  -4   8  -1    6.14    0.58
  -5  -8  -1    6.05    0.69
  -5   8  -1    6.49    0.62
   5   8   1    7.04    0.74
  -5   8  -1    7.49    0.60
  -6  -8  -1    2.99    0.52
   6   8   1    2.70    0.51
  -6   8  -1    2.99    0.48
  -6   8  -1    2.06    0.41
  -7  -8  -1   -0.08    0.29
  -7   8  -1    0.17    0.28
  -8  -8  -1    1.42    0.48
  -8   8  -1    1.07    0.40
  -8   8  -1    1.06    0.36
  -9  -8  -1    3.81    0.69
  -9   8  -1    2.23    0.50
 -10  -8  -1    0.45    0.45
 -10   8  -1    0.01    0.30
 -10  -9   1   -0.24    0.38
 -10   9   1    0.48    0.40
  -9  -9   1    2.64    0.63
  -9   9   1    2.55    0.56
  -8  -9   1   -0.18    0.32
   8   9  -1   -0.16    0.38
  -8   9   1    0.04    0.29
  -7  -9   1    5.20    0.73
  -7   9   1    4.98    0.59
  -7   9   1    4.46    0.64
   7   9  -1    4.75    0.71
  -6  -9   1    2.91    0.57
   6  -9  -1    2.42    0.50
  -6   9   1    2.82    0.44
   6   9  -1    3.59    0.64
  -6   9   1    2.29    0.49
   5  -9  -1   15.67    0.89
  -5  -9   1   17.63    1.01
   5   9  -1   19.65    1.09
  -5   9   1   17.26    0.94
   4  -9  -1   23.39    1.03
  -4  -9   1   24.52    1.12
  -4   9   1   23.04    1.03
   4   9  -1   24.18    1.13
  -3  -9   1   20.31    0.97
   3  -9  -1   19.59    0.94
   3   9  -1   19.67    0.98
  -3   9   1   19.12    0.92
   2  -9  -1    0.45    0.25
  -2  -9   1    0.47    0.29
  -2   9   1    0.06    0.23
   2   9  -1   -0.10    0.26
  -1  -9   1    3.08    0.45
   1  -9  -1    2.91    0.44
   1   9  -1    2.39    0.40
  -1   9   1    2.43    0.41
   0  -9  -1    5.25    0.59
   0  -9   1    5.73    0.57
   0   9   1    5.60    0.59
   0   9  -1    6.98    0.56
   1  -9   1   36.70    1.21
  -1  -9  -1   34.59    1.23
   1   9   1   36.06    1.24
  -1   9  -1   34.07    1.18
  -2  -9  -1   16.37    0.87
   2  -9   1   17.79    0.85
  -2   9  -1   17.71    0.86
   2   9   1   18.65    0.91
  -3  -9  -1   29.83    0.85
  -3  -9  -1   30.07    1.20
   3  -9   1   28.00    1.07
  -3   9  -1   29.99    1.10
   3   9   1   30.69    1.22
  -4  -9  -1    0.26    0.25
   4  -9   1    0.04    0.22
   4   9   1    0.44    0.30
  -4   9  -1    0.25    0.26
  -5  -9  -1    0.45    0.34
  -5   9  -1    0.79    0.31
   5   9   1    0.65    0.36
  -6  -9  -1    0.13    0.26
   6   9   1    0.16    0.34
  -6   9  -1    0.67    0.33
  -6   9  -1    0.95    0.34
  -7  -9  -1    2.12    0.49
  -7   9  -1    1.34    0.38
  -7   9  -1    1.67    0.43
  -8  -9  -1    1.24    0.47
  -8   9  -1    1.15    0.38
  -8   9  -1    0.55    0.35
  -9  -9  -1    4.34    0.76
  -9   9  -1    3.75    0.62
 -10  -9  -1    1.02    0.51
 -10   9  -1    0.97    0.42
  -9 -10   1    5.49    0.88
  -9  10   1    4.71    0.74
  -8 -10   1   -0.08    0.37
   8  10  -1   -0.11    0.39
  -7 -10   1   -0.26    0.25
  -7  10   1    0.07    0.29
  -7  10   1    0.01    0.27
   7  10  -1    0.17    0.36
  -6 -10   1    3.86    0.65
   6  10  -1    3.20    0.60
  -6  10   1    3.15    0.54
   5 -10  -1    4.00    0.57
  -5 -10   1    3.48    0.56
   5  10  -1    4.18    0.62
  -5  10   1    3.41    0.54
  -4 -10   1    2.19    0.47
   4 -10  -1    1.90    0.42
   4  10  -1    2.24    0.49
  -4  10   1    3.05    0.49
   3 -10  -1    0.34    0.29
  -3 -10   1    0.42    0.27
  -3  10   1    0.36    0.31
   3  10  -1    0.61    0.33
  -2 -10   1   11.66    0.77
   2 -10  -1   11.83    0.79
   2  10  -1    9.48    0.73
  -2  10   1   10.75    0.76
   1 -10  -1    1.31    0.36
  -1 -10   1    1.19    0.35
  -1  10   1    0.65    0.31
   1  10  -1    1.19    0.38
   0 -10  -1    5.45    0.60
   0 -10   1    7.02    0.70
   0  10   1    6.47    0.65
   0  10  -1    7.76    0.72
   1 -10   1   25.26    1.06
  -1 -10  -1   25.42    1.13
  -1  10  -1   25.45    1.08
   1  10   1   25.72    1.13
   2 -10   1   26.90    1.10
  -2 -10  -1   27.04    1.15
   2  10   1   25.38    1.13
  -2  10  -1   26.74    1.10
  -3 -10  -1    0.95    0.34
   3 -10   1    0.83    0.30
  -3  10  -1    0.45    0.29
   3  10   1    0.70    0.33
   4 -10   1    5.14    0.62
  -4 -10  -1    3.24    0.56
   4  10   1    2.42    0.51
  -4  10  -1    3.63    0.54
  -5 -10  -1   44.59    1.62
  -5  10  -1   47.65    1.53
   5  10   1   43.05    1.62
  -6 -10  -1   13.53    0.96
  -6  10  -1   12.36    0.83
   6  10   1   13.80    1.00
  -6  10  -1   14.66    0.92
  -7 -10  -1   -0.08    0.31
  -7  10  -1    0.31    0.32
  -7  10  -1    0.13    0.30
  -8 -10  -1   11.45    1.10
  -8  10  -1   10.36    0.83
  -8  10  -1   10.86    0.98
  -9 -10  -1    2.37    0.65
  -9  10  -1    1.78    0.49
  -9 -11   1   -0.14    0.37
  -9  11   1   -0.39    0.31
  -8 -11   1   -0.02    0.36
  -8  11   1   -0.14    0.31
   8  11  -1    0.12    0.43
  -7 -11   1    1.39    0.52
  -7  11   1    1.75    0.49
   7  11  -1    1.29    0.54
  -7  11   1    1.55    0.41
  -6 -11   1    1.52    0.50
   6  11  -1    2.43    0.60
  -6  11   1    0.65    0.37
   5 -11  -1    2.51    0.51
  -5 -11   1    1.94    0.48
   5  11  -1    1.49    0.46
  -5  11   1    1.75    0.45
   4 -11  -1    3.85    0.61
  -4 -11   1    4.36    0.63
  -4  11   1    4.81    0.64
   4  11  -1    3.64    0.60
   3 -11  -1   10.97    0.82
  -3 -11   1   12.18    0.88
  -3  11   1   13.30    0.87
   3  11  -1   12.45    0.91
   2 -11  -1    5.48    0.68
  -2 -11   1    3.63    0.56
  -2  11   1    4.32    0.63
   2  11  -1    3.85    0.58
  -1 -11   1    0.16    0.26
   1 -11  -1    0.70    0.32
  -1  11   1    0.12    0.27
   1  11  -1    0.68    0.34
   0 -11   1   31.19    1.27
   0 -11  -1   32.16    1.30
   0  11   1   32.10    1.30
   0  11  -1   30.38    1.26
  -1 -11  -1    0.15    0.30
   1 -11   1    0.91    0.33
  -1  11  -1    0.25    0.27
   1  11   1    0.28    0.31
  -2 -11  -1   31.13    1.32
   2 -11   1   28.79    1.19
  -2  11  -1   27.64    1.18
   2  11   1   30.15    1.30
  -3 -11  -1    1.93    0.49
   3 -11   1    2.31    0.45
   3  11   1    1.52    0.45
  -3  11  -1    2.14    0.42
  -4 -11  -1    8.74    0.85
  -4  11  -1   10.26    0.77
   4  11   1    8.60    0.85
  -5 -11  -1    2.47    0.52
  -5  11  -1    2.57    0.49
   5  11   1    2.32    0.55
  -6 -11  -1    9.57    1.00
  -6  11  -1    8.41    0.82
  -6  11  -1    9.01    0.88
   6  11   1    7.60    0.89
  -7 -11  -1    0.73    0.45
  -7  11  -1    0.69    0.35
  -7  11  -1    0.88    0.40
  -8 -11  -1   -0.08    0.36
  -8  11  -1    0.06    0.33
  -9 -11  -1    1.86    0.59
  -9  11  -1    1.04    0.44
  -8 -12   1    5.18    0.87
   8  12  -1    2.71    0.74
  -8  12   1    4.04    0.73
  -7 -12   1   -0.05    0.40
  -7  12   1    0.20    0.31
   7  12  -1    0.00    0.41
  -7  12   1    0.33    0.36
  -6 -12   1    0.45    0.39
   6  12  -1   -0.18    0.39
  -6  12   1    0.67    0.39
  -5 -12   1    3.96    0.71
   5 -12  -1    5.22    0.73
  -5  12   1    2.83    0.56
   5  12  -1    4.60    0.77
   4 -12  -1    1.34    0.44
  -4 -12   1    1.65    0.48
  -4  12   1    0.68    0.37
   4  12  -1    0.89    0.41
   3 -12  -1    2.04    0.46
  -3 -12   1    1.98    0.50
  -3  12   1    3.51    0.56
   3  12  -1    2.41    0.55
   2 -12  -1   30.51    1.33
  -2 -12   1   30.10    1.33
  -2  12   1   30.75    1.32
   2  12  -1   31.36    1.37
   1 -12  -1   39.41    1.54
  -1 -12   1   40.02    1.53
  -1  12   1   43.48    1.57
   1  12  -1   38.99    1.52
   0 -12  -1   11.78    0.85
   0 -12   1   11.22    0.81
   0  12   1   14.73    0.96
   0  12  -1   12.88    0.87
   1 -12   1    0.19    0.29
  -1 -12  -1    0.19    0.28
   1  12   1    0.72    0.35
  -1  12  -1    1.42    0.43
  -2 -12  -1    1.75    0.43
   2 -12   1    1.76    0.46
  -2  12  -1    2.88    0.54
   2  12   1    2.15    0.48
   3 -12   1   24.04    1.15
  -3 -12  -1   24.70    1.27
   3  12   1   25.61    1.29
  -3  12  -1   24.16    1.17
  -4 -12  -1    6.51    0.82
  -4  12  -1    5.32    0.66
   4  12   1    7.42    0.87
  -5 -12  -1    6.62    0.85
   5  12   1    4.81    0.72
  -5  12  -1    6.22    0.71
  -6 -12  -1    2.61    0.65
   6  12   1    0.95    0.45
  -6  12  -1    1.35    0.41
  -6  12  -1    0.55    0.39
  -7 -12  -1   14.23    1.30
  -7  12  -1   14.81    1.01
  -7  12  -1   15.50    1.06
  -8 -12  -1    1.70    0.62
  -8  12  -1    1.55    0.49
  -8 -13   1    0.58    0.54
   8  13  -1    0.73    0.55
  -8  13   1    0.69    0.46
  -7 -13   1    5.71    0.92
   7  13  -1    3.91    0.83
  -7  13   1    1.94    0.56
  -6 -13   1   -0.55    0.30
  -6  13   1    0.15    0.37
   6  13  -1   -0.29    0.38
  -5 -13   1    3.77    0.72
   5  13  -1    1.95    0.61
  -5  13   1    2.27    0.52
  -4 -13   1    4.77    0.73
   4 -13  -1    5.51    0.78
   4  13  -1    3.90    0.68
  -4  13   1    6.12    0.84
   3 -13  -1    0.84    0.39
  -3 -13   1    0.41    0.34
  -3  13   1    0.17    0.30
   3  13  -1    0.25    0.34
  -2 -13   1   -0.01    0.30
   2 -13  -1    0.15    0.32
  -2  13   1   -0.38    0.25
   2  13  -1   -0.56    0.28
  -1 -13   1   22.61    1.20
   1 -13  -1   21.96    1.21
   1  13  -1   22.87    1.20
  -1  13   1   23.45    1.24
   0 -13   1    0.05    0.30
   0 -13  -1    0.03    0.27
   0  13  -1    0.14    0.34
   0  13   1    0.12    0.31
   1 -13   1    0.72    0.33
  -1 -13  -1    0.53    0.39
  -1  13  -1    0.14    0.31
   1  13   1    0.40    0.37
  -2 -13  -1   10.06    0.98
   2 -13   1   11.17    0.88
  -2  13  -1   10.83    0.99
   2  13   1   11.90    0.95
  -3 -13  -1    5.83    0.76
   3 -13   1    5.33    0.70
  -3  13  -1    4.03    0.60
   3  13   1    5.20    0.75
  -4 -13  -1    8.95    0.99
   4  13   1    7.23    0.91
  -4  13  -1    6.26    0.75
  -5 -13  -1   -0.33    0.31
   5  13   1    0.02    0.38
  -5  13  -1    0.12    0.33
  -6 -13  -1    2.92    0.64
  -6  13  -1    2.32    0.55
  -6  13  -1    2.64    0.57
   6  13   1    1.51    0.53
  -7 -13  -1    1.64    0.58
  -7  13  -1    1.17    0.45
  -7  13  -1    2.15    0.56
  -8 -13  -1    4.49    0.83
  -8  13  -1    3.67    0.66
  -7 -14   1    0.29    0.51
  -7  14   1    0.26    0.42
   7  14  -1    1.32    0.61
  -6 -14   1    0.19    0.44
  -6  14   1    0.44    0.43
   6  14  -1    1.28    0.57
  -5 -14   1   -0.29    0.38
   5  14  -1    0.63    0.50
  -5  14   1   -0.31    0.30
  -4 -14   1    1.10    0.51
   4 -14  -1    0.93    0.46
  -4  14   1    1.15    0.47
   4  14  -1    0.57    0.47
  -3 -14   1    7.58    0.94
   3 -14  -1    9.67    1.04
  -3  14   1    7.14    0.88
   3  14  -1    6.09    0.86
  -2 -14   1    2.34    0.52
   2 -14  -1    2.27    0.56
   2  14  -1    2.68    0.60
  -2  14   1    2.56    0.58
   1 -14  -1    0.04    0.34
  -1 -14   1   -0.08    0.32
  -1  14   1   -0.03    0.36
   1  14  -1    0.00    0.34
   0 -14   1    1.73    0.46
   0 -14  -1    3.43    0.64
   0  14  -1    2.14    0.52
   0  14   1    2.53    0.59
  -1 -14  -1    0.80    0.40
   1 -14   1    3.01    0.61
  -1  14  -1    1.34    0.47
   1  14   1    1.17    0.43
  -2 -14  -1    0.10    0.34
   2 -14   1    0.72    0.43
  -2  14  -1    0.18    0.34
   2  14   1    0.78    0.47
  -3 -14  -1    4.81    0.77
   3  14   1    3.38    0.65
  -3  14  -1    2.79    0.55
  -4 -14  -1    0.64    0.43
  -4  14  -1    0.36    0.37
   4  14   1    0.53    0.42
  -5 -14  -1    1.46    0.53
  -5  14  -1    1.10    0.48
   5  14   1    1.34    0.54
  -6 -14  -1   18.27    1.32
   6  14   1   19.51    1.37
  -6  14  -1   17.16    1.15
  -7 -14  -1    4.48    0.86
  -7  14  -1    3.04    0.61
  -7  14  -1    3.94    0.70
  -6 -15   1    5.32    0.90
   6  15  -1    4.06    0.81
  -6  15   1    6.15    0.91
  -5 -15   1    0.01    0.38
   5  15  -1   -0.19    0.38
  -5  15   1   -0.72    0.28
  -4 -15   1    1.53    0.53
  -4  15   1    1.30    0.52
   4  15  -1    0.75    0.48
   3 -15  -1    6.22    0.88
  -3 -15   1    7.19    0.94
   3  15  -1    7.61    0.99
  -3  15   1    7.98    0.96
   2 -15  -1    0.33    0.40
  -2 -15   1    0.13    0.34
  -2  15   1    0.48    0.42
   2  15  -1    0.03    0.36
  -1 -15   1   -0.31    0.31
   1 -15  -1   -0.35    0.32
   1  15  -1    0.62    0.44
  -1  15   1   -0.15    0.33
   0 -15  -1   -0.17    0.35
   0 -15   1   -0.51    0.30
   0  15   1    1.05    0.48
   0  15  -1    1.09    0.50
  -1 -15  -1    4.02    0.75
   1 -15   1    2.70    0.64
  -1  15  -1    2.87    0.62
   1  15   1    3.35    0.71
  -2 -15  -1    4.71    0.78
   2 -15   1    4.41    0.75
   2  15   1    3.66    0.75
  -2  15  -1    3.58    0.68
  -3 -15  -1    0.19    0.43
   3  15   1    1.60    0.57
  -3  15  -1    0.45    0.39
  -4 -15  -1    0.73    0.49
   4  15   1    0.33    0.42
  -4  15  -1    1.23    0.50
  -5 -15  -1    0.56    0.49
   5  15   1    0.19    0.48
  -5  15  -1    0.00    0.36
  -6 -15  -1    3.92    0.81
  -6  15  -1    3.17    0.65
   6  15   1    3.61    0.82
  -5 -16   1    0.18    0.49
  -5  16   1    0.30    0.43
   5  16  -1   -0.20    0.49
  -4 -16   1    0.70    0.50
  -4  16   1    0.60    0.46
   4  16  -1    0.88    0.53
  -3 -16   1    8.71    1.07
   3 -16  -1   11.12    1.20
  -3  16   1    9.44    1.10
   3  16  -1    6.93    0.99
   2 -16  -1   -0.27    0.39
  -2 -16   1   -0.25    0.36
  -2  16   1    0.00    0.39
   2  16  -1   -0.21    0.40
   1 -16  -1    7.36    0.97
  -1 -16   1    7.62    1.00
   1  16  -1    8.05    1.01
  -1  16   1    9.34    1.06
   0 -16   1    1.29    0.47
   0 -16  -1    0.46    0.47
   0  16   1    1.10    0.53
   0  16  -1    0.81    0.46
  -1 -16  -1    2.23    0.59
   1 -16   1    2.19    0.60
  -1  16  -1    1.87    0.57
   1  16   1    2.46    0.62
  -2 -16  -1    4.40    0.82
   2  16   1    4.17    0.79
  -2  16  -1    3.98    0.74
  -3 -16  -1    1.20    0.58
  -3  16  -1    0.57    0.44
   3  16   1    0.32    0.45
  -4 -16  -1    1.70    0.63
  -4  16  -1    1.42    0.55
   4  16   1    1.46    0.56
  -5 -16  -1    2.17    0.68
  -5  16  -1    2.00    0.61
   5  16   1    2.05    0.68
  -4 -17   1    0.28    0.50
   4  17  -1   -0.80    0.40
  -4  17   1   -0.55    0.35
  -3 -17   1    3.02    0.72
  -3  17   1    3.05    0.71
   3  17  -1    2.38    0.69
  -2 -17   1    3.21    0.68
   2 -17  -1    3.88    0.79
  -2  17   1    2.92    0.75
   2  17  -1    2.88    0.70
   1 -17  -1    1.78    0.62
  -1 -17   1    0.44    0.46
   1  17  -1    0.32    0.48
  -1  17   1    0.06    0.46
   0 -17   1    2.66    0.68
   0 -17  -1    4.10    0.80
   0  17   1    4.35    0.80
   0  17  -1    3.39    0.78
   1 -17   1   -0.13    0.42
  -1 -17  -1    0.24    0.47
   1  17   1    0.29    0.52
  -1  17  -1   -0.06    0.47
  -2 -17  -1   -0.33    0.43
  -2  17  -1   -0.54    0.31
   2  17   1    0.33    0.50
  -3 -17  -1   -0.24    0.40
   3  17   1   -0.42    0.38
  -3  17  -1    0.76    0.52
  -4 -17  -1    0.98    0.58
  -4  17  -1    0.80    0.50
   4  17   1    1.00    0.58
  -2 -18   1    1.21    0.61
   2 -18  -1    2.95    0.73
  -2  18   1    2.91    0.72
   2  18  -1    1.47    0.65
   1 -18  -1    0.23    0.55
  -1 -18   1    0.19    0.50
  -1  18   1    0.13    0.46
   1  18  -1    0.27    0.52
   0 -18   1    0.31    0.47
   0 -18  -1    0.34    0.49
   0  18  -1   -0.24    0.42
   0  18   1    0.00    0.44
  -1 -18  -1    0.53    0.49
   1  18   1   -0.25    0.39
  -1  18  -1   -0.09    0.44
  -2 -18  -1    1.55    0.60
  -2  18  -1    0.94    0.56
   2  18   1    0.70    0.58
 -11   0   2    0.09    0.34
 -10   0   2    1.25    0.45
  -9   0   2   -0.22    0.24
  -8   0   2    8.72    0.71
   8   0  -2    9.31    0.72
   7   0  -2    0.57    0.31
  -7   0   2    0.03    0.23
  -6   0   2    3.64    0.47
   6   0  -2    3.77    0.47
   5   0  -2    0.09    0.19
  -5   0   2   -0.08    0.17
   4   0  -2  331.59    4.94
  -4   0   2  331.72    4.95
   3   0  -2   -0.10    0.12
  -3   0   2   -0.09    0.12
   2   0  -2  199.20    2.95
  -2   0   2  198.59    2.95
   1   0  -2   -0.13    0.05
  -1   0   2   -0.20    0.04
   1   0  -2   -0.10    0.09
  -1   0   2   -0.07    0.09
   0   0  -2  132.64    1.90
   0   0  -2  135.48    2.01
   0   0  -2  134.28    1.84
  -1   0  -2   -0.03    0.10
  -1   0  -2    0.01    0.09
  -1   0  -2    0.00    0.04
  -2   0  -2   24.28    0.67
  -2   0  -2   25.34    0.69
  -2   0  -2   24.94    0.48
  -3   0  -2    0.18    0.10
  -3   0  -2    0.10    0.13
  -3   0  -2    0.13    0.13
  -4   0  -2   51.45    1.08
  -4   0  -2   52.53    1.26
  -4   0  -2   54.65    1.29
   4   0   2   52.61    1.08
  -5   0  -2    0.19    0.16
  -5   0  -2    0.75    0.24
   5   0   2    0.08    0.15
  -5   0  -2    0.20    0.15
  -6   0  -2   21.36    0.88
  -6   0  -2   20.54    0.77
  -6   0  -2   21.51    0.88
  -7   0  -2   -0.20    0.16
  -7   0  -2   -0.34    0.16
  -8   0  -2    9.16    0.64
  -9   0  -2    0.23    0.25
 -10   0  -2   10.61    0.79
 -11   0  -2    0.08    0.30
 -11  -1   2    1.19    0.51
 -11   1   2    1.19    0.48
 -10  -1   2    0.76    0.39
 -10   1   2    1.67    0.49
  -9  -1   2    3.32    0.58
  -9   1   2    3.03    0.55
  -8  -1   2    4.06    0.58
   8  -1  -2    4.07    0.55
   8   1  -2    3.95    0.57
  -8   1   2    4.37    0.58
   7  -1  -2   46.54    1.47
  -7  -1   2   49.35    1.53
  -7   1   2   47.12    1.49
   7   1  -2   49.17    1.52
  -6  -1   2    0.98    0.30
   6  -1  -2    0.86    0.28
  -6   1   2    0.71    0.18
   6   1  -2    0.96    0.32
  -6   1   2    0.77    0.29
  -5  -1   2   18.39    0.77
   5  -1  -2   17.31    0.75
   5   1  -2   17.72    0.76
  -5   1   2   16.66    0.50
  -5   1   2   17.25    0.75
  -4  -1   2   38.42    1.06
   4  -1  -2   39.37    1.05
  -4   1   2   39.63    1.06
   4   1  -2   36.65    1.03
  -4   1   2   39.07    0.73
  -3  -1   2   22.49    0.71
   3  -1  -2   22.84    0.71
  -3   1   2   23.21    0.44
  -3   1   2   21.33    0.69
  -2  -1   2  168.12    2.58
   2   1  -2  168.04    2.58
   1  -1  -2    3.01    0.21
   1   1  -2    3.00    0.20
  -1   1   2    2.70    0.20
   1   1  -2    2.96    0.17
   0  -1  -2    6.48    0.24
   0  -1  -2    6.24    0.28
   0   1  -2    6.74    0.20
   0   1  -2    6.47    0.25
   0   1  -2    6.61    0.27
  -1  -1  -2  664.06    9.42
  -1  -1  -2  678.72    9.17
  -1  -1  -2  657.00    9.68
  -1   1  -2  660.36    9.70
  -1   1  -2  658.31    9.33
  -2  -1  -2   21.45    0.49
  -2  -1  -2   20.85    0.62
  -2  -1  -2   21.47    0.61
  -2   1  -2   21.45    0.63
  -2   1  -2   20.28    0.64
  -2   1  -2   20.51    0.41
  -3  -1  -2  135.69    2.08
  -3  -1  -2  134.54    2.25
  -3  -1  -2  132.71    2.26
  -3   1  -2  130.06    1.98
  -3   1  -2  131.74    2.32
  -3   1  -2  132.68    2.26
  -4  -1  -2    9.35    0.52
  -4  -1  -2    9.03    0.42
  -4  -1  -2    9.60    0.48
  -4   1  -2   10.56    0.54
  -4   1  -2   10.17    0.41
  -4   1  -2   10.54    0.54
   4   1   2    9.23    0.42
   5  -1   2   91.73    1.72
  -5  -1  -2   93.03    1.91
  -5  -1  -2   93.37    1.80
  -5  -1  -2   96.39    1.98
  -5   1  -2   93.16    1.75
  -5   1  -2   91.13    2.00
   5   1   2   96.50    1.80
  -5   1  -2   94.30    1.97
  -6  -1  -2    4.15    0.46
  -6  -1  -2    3.15    0.38
  -6   1  -2    3.18    0.37
  -6   1  -2    3.96    0.49
  -6   1  -2    3.05    0.41
  -7  -1  -2    0.11    0.20
  -7  -1  -2   -0.07    0.16
  -7   1  -2    0.22    0.24
  -7   1  -2   -0.06    0.17
  -8  -1  -2    4.26    0.53
  -8   1  -2    3.19    0.52
  -8   1  -2    4.36    0.51
  -9  -1  -2    0.01    0.26
  -9   1  -2    0.11    0.26
 -10  -1  -2    2.14    0.47
 -10   1  -2    3.02    0.50
 -11  -1  -2   -0.18    0.27
 -11   1  -2    0.17    0.30
 -11  -2   2   15.87    1.15
 -11   2   2   14.97    1.09
 -10  -2   2    1.63    0.48
 -10   2   2    0.75    0.40
  -9  -2   2    0.90    0.38
  -9   2   2    1.12    0.40
  -8  -2   2    2.43    0.48
   8  -2  -2    2.63    0.50
  -8   2   2    2.44    0.47
   8   2  -2    3.02    0.52
   7  -2  -2    3.47    0.48
  -7  -2   2    3.98    0.54
  -7   2   2    5.18    0.38
  -7   2   2    4.60    0.56
   7   2  -2    4.86    0.59
   6  -2  -2    2.62    0.39
  -6  -2   2    1.82    0.35
  -6   2   2    2.66    0.42
  -6   2   2    2.18    0.25
   6   2  -2    1.83    0.36
   5  -2  -2   30.81    1.03
  -5  -2   2   34.22    1.10
  -5   2   2   35.13    1.10
   5   2  -2   36.09    1.12
  -5   2   2   32.81    0.77
   4  -2  -2   28.61    0.88
  -4  -2   2   24.95    0.85
   4   2  -2   25.00    0.86
  -4   2   2   24.98    0.59
  -4   2   2   25.24    0.84
   3  -2  -2   74.70    1.50
  -3  -2   2   75.03    1.52
   3   2  -2   75.31    1.53
  -3   2   2   76.67    1.52
  -2  -2   2    0.10    0.13
   2  -2  -2    0.11    0.15
   2   2  -2    0.11    0.14
  -2   2   2    0.11    0.14
   1  -2  -2  121.43    1.90
  -1  -2   2  117.85    1.86
   1   2  -2  122.50    1.88
  -1   2   2  119.79    1.89
   1   2  -2  118.55    1.73
   0  -2  -2  932.86   13.20
   0   2  -2  935.04   13.37
   0   2   2  907.31   13.31
   0   2  -2  927.65   12.85
  -1  -2  -2  412.73    5.67
  -1  -2  -2  410.94    5.78
  -1   2  -2  421.00    5.74
  -1   2  -2  417.39    5.69
  -1   2  -2  412.90    5.59
   1   2   2  413.94    5.77
  -2  -2  -2    5.03    0.30
  -2  -2  -2    5.32    0.29
  -2   2  -2    4.75    0.33
  -2   2  -2    4.39    0.21
  -2   2  -2    5.45    0.34
   2   2   2    4.57    0.28
  -3  -2  -2   57.23    1.18
  -3  -2  -2   58.15    1.14
  -3   2  -2   54.34    1.29
   3   2   2   54.14    1.11
  -3   2  -2   55.16    1.24
  -3   2  -2   55.03    1.01
  -4  -2  -2   62.78    1.33
  -4  -2  -2   63.17    1.36
  -4   2  -2   65.95    1.24
  -4   2  -2   64.32    1.47
  -4   2  -2   63.52    1.52
   4   2   2   65.49    1.35
  -5  -2  -2    0.45    0.18
   5  -2   2    0.52    0.18
  -5  -2  -2    0.45    0.20
   5   2   2    0.54    0.21
  -5   2  -2    0.25    0.20
  -5   2  -2    0.58    0.18
  -5   2  -2    0.29    0.20
  -6  -2  -2   33.87    1.06
  -6  -2  -2   34.27    1.07
  -6   2  -2   33.84    1.00
  -6   2  -2   34.48    1.15
  -7  -2  -2    4.30    0.50
  -7  -2  -2    3.96    0.47
  -7   2  -2    4.55    0.54
  -7   2  -2    3.72    0.45
  -8  -2  -2   26.98    1.09
  -8   2  -2   28.35    1.05
  -8   2  -2   26.99    1.14
  -9  -2  -2    0.22    0.27
  -9   2  -2    0.61    0.34
  -9   2  -2    0.41    0.26
 -10  -2  -2    7.38    0.80
 -10   2  -2    6.52    0.71
 -11  -2  -2    8.70    0.91
 -11   2  -2    8.52    0.86
 -11  -3   2    2.60    0.61
 -11   3   2    3.29    0.67
 -10  -3   2    2.04    0.54
 -10   3   2    2.23    0.54
  -9  -3   2    0.90    0.38
  -9   3   2    0.51    0.32
  -8  -3   2   14.10    0.90
   8  -3  -2   15.37    0.90
  -8   3   2   15.24    0.93
   8   3  -2   13.61    0.90
   7  -3  -2   19.87    0.94
  -7  -3   2   20.68    1.00
  -7   3   2   17.46    0.67
   7   3  -2   16.41    0.92
  -7   3   2   18.52    0.93
   6  -3  -2    0.01    0.19
  -6  -3   2    0.24    0.24
  -6   3   2    0.02    0.18
  -6   3   2    0.16    0.15
   6   3  -2   -0.08    0.24
   5  -3  -2  137.74    2.60
  -5  -3   2  138.65    2.67
   5   3  -2  136.49    2.67
  -5   3   2  140.21    2.63
  -5   3   2  139.80    2.21
   4  -3  -2    7.88    0.48
  -4  -3   2    8.14    0.50
  -4   3   2    8.71    0.35
  -4   3   2    8.24    0.50
   4   3  -2    8.56    0.52
   3  -3  -2    4.37    0.40
  -3  -3   2    4.34    0.40
   3   3  -2    4.68    0.41
  -3   3   2    4.35    0.36
  -2  -3   2  239.28    3.58
   2  -3  -2  240.32    3.58
   2   3  -2  236.46    3.58
  -2   3   2  237.80    3.57
   1  -3  -2    2.29    0.25
  -1  -3   2    2.03    0.24
   1   3  -2    2.08    0.17
  -1   3   2    2.10    0.24
   1   3  -2    2.19    0.25
   0  -3   2  150.40    2.24
   0  -3  -2  145.20    2.31
   0   3  -2  153.30    2.28
   0   3  -2  152.68    2.26
   0   3   2  148.07    2.31
  -1  -3  -2   20.88    0.60
  -1  -3  -2   21.11    0.60
   1   3   2   20.29    0.58
  -1   3  -2   20.92    0.63
  -1   3  -2   21.24    0.52
  -2  -3  -2    0.22    0.14
  -2  -3  -2    0.06    0.10
  -2   3  -2    0.17    0.15
  -2   3  -2    0.09    0.12
  -2   3  -2    0.23    0.10
   2   3   2    0.24    0.14
  -3  -3  -2   60.23    1.27
  -3  -3  -2   61.05    1.24
  -3   3  -2   60.46    1.13
   3   3   2   61.57    1.28
  -3   3  -2   62.99    1.37
  -3   3  -2   59.56    1.42
  -4  -3  -2  102.74    1.93
   4  -3   2  100.64    1.75
  -4  -3  -2  102.46    1.88
   4   3   2  100.01    1.91
  -4   3  -2  103.18    2.13
  -4   3  -2  104.35    1.78
  -4   3  -2  103.38    2.03
  -5  -3  -2    0.51    0.19
  -5  -3  -2    0.18    0.20
   5  -3   2    0.29    0.16
   5   3   2    0.24    0.20
  -5   3  -2    0.50    0.23
  -5   3  -2    0.74    0.21
  -6  -3  -2   21.39    0.80
  -6  -3  -2   20.91    0.85
   6   3   2   20.38    0.85
  -6   3  -2   21.20    0.90
  -6   3  -2   20.67    0.77
  -7  -3  -2    2.65    0.39
  -7  -3  -2    2.45    0.41
  -7   3  -2    2.29    0.41
  -7   3  -2    3.05    0.41
  -8  -3  -2    0.34    0.27
  -8   3  -2    1.32    0.38
  -8   3  -2    0.87    0.29
  -9  -3  -2    0.47    0.30
  -9   3  -2    0.13    0.28
  -9   3  -2    0.12    0.24
 -10  -3  -2    0.04    0.29
 -10   3  -2    0.05    0.25
 -11  -3  -2   22.48    1.23
 -11   3  -2   24.06    1.18
 -11  -4   2    0.95    0.45
 -11   4   2   -0.25    0.30
 -10  -4   2    3.63    0.66
 -10   4   2    3.41    0.61
  -9  -4   2    5.65    0.74
  -9   4   2    5.71    0.72
   8  -4  -2   14.84    0.96
  -8  -4   2   14.23    0.92
  -8   4   2   15.02    0.92
   8   4  -2   14.13    0.93
   7  -4  -2   12.23    0.78
  -7  -4   2   10.67    0.77
  -7   4   2   12.66    0.59
   7   4  -2   12.35    0.83
  -7   4   2   12.88    0.80
   6  -4  -2    5.90    0.58
  -6  -4   2    6.79    0.66
   6   4  -2    6.53    0.62
  -6   4   2    5.55    0.56
  -6   4   2    6.03    0.40
  -5  -4   2   54.76    1.49
   5  -4  -2   52.08    1.40
  -5   4   2   51.50    1.13
   5   4  -2   53.18    1.48
   4  -4  -2   41.53    1.15
  -4  -4   2   38.18    1.14
   4   4  -2   41.71    1.19
  -4   4   2   40.30    1.15
   3  -4  -2   14.50    0.62
  -3  -4   2   14.18    0.62
   3   4  -2   14.65    0.64
  -3   4   2   15.26    0.64
   2  -4  -2   44.67    1.08
  -2  -4   2   46.38    1.10
  -2   4   2   44.49    1.09
   2   4  -2   44.52    1.10
  -1  -4   2   72.59    1.43
   1  -4  -2   73.12    1.47
  -1   4   2   75.69    1.48
   1   4  -2   77.05    1.47
   1   4  -2   79.52    1.26
   0  -4  -2  140.49    2.32
   0  -4   2  138.58    2.22
   0   4   2  141.79    2.31
   0   4  -2  139.87    2.24
   0   4  -2  140.94    2.21
   1  -4   2  381.23    5.20
  -1  -4  -2  370.84    5.33
   1   4   2  370.99    5.32
  -1   4  -2  378.55    5.37
  -1   4  -2  378.81    5.19
  -2  -4  -2    9.73    0.47
  -2  -4  -2   10.03    0.42
   2  -4   2   10.03    0.39
  -2   4  -2    9.79    0.39
   2   4   2    9.87    0.48
  -2   4  -2    9.77    0.50
   3  -4   2   16.68    0.53
  -3  -4  -2   16.76    0.57
  -3  -4  -2   17.84    0.67
  -3   4  -2   16.40    0.55
  -3   4  -2   17.98    0.69
  -3   4  -2   16.95    0.73
   3   4   2   16.81    0.65
  -4  -4  -2   28.34    0.91
  -4  -4  -2   27.63    0.79
   4  -4   2   26.68    0.75
  -4   4  -2   28.02    0.79
   4   4   2   26.49    0.88
  -4   4  -2   28.66    0.95
  -5  -4  -2    3.74    0.43
  -5  -4  -2    4.56    0.36
   5  -4   2    4.54    0.40
  -5   4  -2    4.66    0.38
  -5   4  -2    4.46    0.50
   5   4   2    4.49    0.46
  -6  -4  -2    4.62    0.44
  -6  -4  -2    4.24    0.50
  -6   4  -2    4.26    0.49
   6   4   2    4.48    0.49
  -6   4  -2    4.46    0.45
  -7  -4  -2   25.21    1.05
  -7   4  -2   25.40    1.08
  -7   4  -2   24.35    0.94
  -8  -4  -2    0.90    0.36
  -8   4  -2    0.99    0.35
  -8   4  -2    0.65    0.29
  -9  -4  -2    0.58    0.32
  -9   4  -2    0.32    0.27
  -9   4  -2    0.38    0.34
 -10  -4  -2    0.61    0.38
 -10   4  -2    0.54    0.31
 -11  -4  -2   12.29    0.97
 -11  -5   2    2.44    0.63
 -11   5   2    1.49    0.51
 -10  -5   2   -0.32    0.28
 -10   5   2    0.77    0.38
  -9  -5   2   -0.16    0.31
  -9   5   2   -0.06    0.28
   9   5  -2   -0.14    0.34
  -8  -5   2   16.47    1.01
  -8   5   2   15.53    0.95
   8   5  -2   18.41    1.07
   7  -5  -2   39.34    1.37
  -7  -5   2   38.94    1.45
  -7   5   2   39.14    1.39
   7   5  -2   39.59    1.47
  -7   5   2   40.81    1.13
  -6  -5   2   37.47    1.33
   6  -5  -2   34.18    1.22
  -6   5   2   37.30    1.27
   6   5  -2   37.16    1.33
  -6   5   2   34.65    0.99
  -5  -5   2    1.63    0.38
   5  -5  -2    1.75    0.36
  -5   5   2    1.49    0.34
  -5   5   2    1.67    0.26
   5   5  -2    1.36    0.36
   4  -5  -2    2.22    0.37
  -4  -5   2    1.73    0.32
   4   5  -2    1.51    0.32
  -4   5   2    2.44    0.38
  -3  -5   2    4.57    0.47
   3  -5  -2    3.38    0.38
  -3   5   2    3.39    0.38
   3   5  -2    4.20    0.45
   2  -5  -2  143.71    2.53
  -2  -5   2  142.42    2.52
  -2   5   2  145.18    2.52
   2   5  -2  143.15    2.54
  -1  -5   2   10.38    0.51
   1  -5  -2   10.60    0.53
  -1   5   2   11.51    0.53
   1   5  -2   11.28    0.53
   0  -5   2   95.05    1.74
   0  -5  -2   93.04    1.80
   0   5   2   93.65    1.79
   0   5  -2   94.15    1.74
   1  -5   2   36.64    0.91
  -1  -5  -2   35.62    0.99
  -1   5  -2   38.08    0.92
   1   5   2   37.07    0.99
   2  -5   2  118.97    2.02
  -2  -5  -2  119.69    2.18
  -2  -5  -2  114.31    1.99
   2   5   2  118.08    2.17
  -2   5  -2  115.64    2.00
  -3  -5  -2  190.76    3.18
  -3  -5  -2  186.80    2.95
   3  -5   2  188.85    2.95
   3   5   2  188.10    3.17
  -3   5  -2  188.78    2.97
  -3   5  -2  187.67    3.18
  -4  -5  -2   11.81    0.63
   4  -5   2   11.60    0.52
  -4  -5  -2   11.29    0.50
  -4   5  -2   10.61    0.60
   4   5   2   10.93    0.61
  -4   5  -2   11.64    0.54
  -5  -5  -2   26.46    0.82
  -5  -5  -2   27.40    1.01
  -5   5  -2   26.72    1.02
   5   5   2   28.77    1.03
  -6  -5  -2    0.54    0.27
  -6  -5  -2    0.62    0.21
  -6   5  -2    0.19    0.24
   6   5   2    0.78    0.30
  -6   5  -2    0.71    0.24
  -7  -5  -2    0.22    0.25
  -7   5  -2    0.31    0.22
  -7   5  -2    0.62    0.31
  -8  -5  -2    0.29    0.29
  -8   5  -2   -0.15    0.20
  -8   5  -2    0.49    0.32
  -9  -5  -2   44.03    1.61
  -9   5  -2   44.37    1.62
  -9   5  -2   41.89    1.44
 -10  -5  -2    0.34    0.35
 -10   5  -2    0.10    0.27
 -11  -6   2    0.78    0.49
 -11   6   2    1.85    0.55
 -10  -6   2    0.46    0.40
 -10   6   2   -0.29    0.28
  -9  -6   2    0.23    0.33
  -9   6   2    0.17    0.30
   9   6  -2    0.13    0.39
  -8  -6   2   16.42    1.04
  -8   6   2   18.62    1.04
   8   6  -2   18.50    1.08
   7  -6  -2   18.62    0.97
  -7  -6   2   19.60    1.05
  -7   6   2   19.24    0.80
  -7   6   2   18.85    0.99
   7   6  -2   20.41    1.09
  -6  -6   2    9.24    0.72
   6  -6  -2    8.82    0.67
  -6   6   2    8.42    0.68
  -6   6   2    8.37    0.52
   6   6  -2    9.44    0.76
  -5  -6   2   34.34    1.24
   5  -6  -2   32.76    1.16
   5   6  -2   35.59    1.28
  -5   6   2   34.08    1.19
  -4  -6   2   25.52    1.00
   4  -6  -2   24.84    0.95
  -4   6   2   25.61    0.97
   4   6  -2   26.53    1.03
  -3  -6   2   55.77    1.45
   3  -6  -2   54.33    1.41
   3   6  -2   57.50    1.48
  -3   6   2   54.27    1.41
  -2  -6   2    0.44    0.19
   2  -6  -2    0.35    0.19
   2   6  -2    0.26    0.19
  -2   6   2    0.20    0.19
  -1  -6   2    8.13    0.49
   1  -6  -2    8.80    0.53
   1   6  -2    9.84    0.53
  -1   6   2    8.57    0.52
   0  -6  -2   36.00    1.05
   0  -6   2   37.52    1.01
   0   6   2   36.48    1.04
   0   6  -2   36.83    1.01
  -1  -6  -2    4.75    0.45
   1  -6   2    5.14    0.38
   1   6   2    5.62    0.44
  -1   6  -2    5.41    0.39
  -2  -6  -2   57.59    1.42
   2  -6   2   57.90    1.29
  -2  -6  -2   58.96    1.26
  -2   6  -2   57.83    1.30
   2   6   2   58.20    1.43
  -3  -6  -2   -0.06    0.18
   3  -6   2   -0.03    0.12
  -3  -6  -2    0.25    0.14
   3   6   2    0.23    0.21
  -3   6  -2    0.07    0.16
   4  -6   2    0.56    0.19
  -4  -6  -2    0.16    0.23
  -4  -6  -2    0.33    0.15
  -4   6  -2    0.36    0.19
  -4   6  -2    0.34    0.21
   4   6   2    0.14    0.23
  -5  -6  -2    0.27    0.15
  -5  -6  -2    0.21    0.23
  -5   6  -2   -0.01    0.19
   5   6   2    0.50    0.27
  -5   6  -2    0.39    0.20
  -6  -6  -2    3.45    0.50
  -6   6  -2    2.90    0.39
  -6   6  -2    3.44    0.50
   6   6   2    3.92    0.54
  -7  -6  -2    9.70    0.74
  -7   6  -2    8.77    0.70
  -7   6  -2    9.34    0.63
  -8  -6  -2   47.43    1.64
  -8   6  -2   45.76    1.45
  -8   6  -2   45.85    1.61
  -9  -6  -2   37.13    1.53
  -9   6  -2   38.90    1.54
  -9   6  -2   37.06    1.35
 -10  -6  -2    7.03    0.86
 -10   6  -2    6.24    0.71
 -11   7   2    0.57    0.42
 -10  -7   2    0.31    0.35
 -10   7   2    0.32    0.35
  -9  -7   2    0.26    0.35
  -9   7   2    0.18    0.31
   9   7  -2    0.53    0.44
  -8  -7   2    1.52    0.44
  -8   7   2    1.17    0.41
   8   7  -2    1.28    0.47
   7  -7  -2    6.50    0.73
  -7  -7   2    4.67    0.66
  -7   7   2    5.79    0.56
   7   7  -2    6.79    0.80
  -6  -7   2    0.63    0.32
   6  -7  -2    1.18    0.37
   6   7  -2    0.85    0.36
  -6   7   2    1.32    0.29
  -6   7   2    1.37    0.38
   5  -7  -2   18.52    0.89
  -5  -7   2   15.80    0.90
   5   7  -2   19.29    0.99
  -5   7   2   16.67    0.86
   4  -7  -2    8.18    0.61
  -4  -7   2    9.17    0.65
  -4   7   2    9.42    0.65
   4   7  -2    8.38    0.64
  -3  -7   2    4.23    0.50
   3  -7  -2    3.37    0.45
   3   7  -2    3.47    0.49
  -3   7   2    4.10    0.50
  -2  -7   2   28.16    0.98
   2  -7  -2   27.88    0.99
   2   7  -2   27.18    0.99
  -2   7   2   27.07    0.97
  -1  -7   2    1.43    0.28
   1  -7  -2    0.75    0.24
  -1   7   2    1.02    0.26
   1   7  -2    0.86    0.24
   0  -7   2  319.92    4.88
   0  -7  -2  318.37    4.96
   0   7  -2  316.48    4.87
   0   7   2  316.13    4.93
   1  -7   2  249.03    3.96
  -1  -7  -2  247.21    4.08
  -1   7  -2  247.79    3.95
   1   7   2  249.00    4.07
   2  -7   2   33.94    1.01
  -2  -7  -2   33.16    1.12
  -2   7  -2   36.27    1.04
   2   7   2   34.60    1.12
  -3  -7  -2    2.30    0.41
  -3  -7  -2    2.04    0.27
   3  -7   2    1.84    0.29
  -3   7  -2    2.02    0.33
   3   7   2    1.92    0.36
  -4  -7  -2    0.35    0.23
   4  -7   2    0.06    0.17
  -4  -7  -2    0.33    0.16
  -4   7  -2    0.14    0.19
  -4   7  -2    0.20    0.22
   4   7   2    0.16    0.24
  -5  -7  -2    1.24    0.35
  -5   7  -2    0.67    0.26
  -5   7  -2    0.38    0.27
   5   7   2    0.44    0.31
  -6  -7  -2   44.94    1.49
   6   7   2   43.71    1.49
  -6   7  -2   42.83    1.31
  -6   7  -2   43.73    1.47
  -7  -7  -2    1.90    0.45
  -7   7  -2    2.00    0.38
  -7   7  -2    2.75    0.50
  -8  -7  -2   11.59    1.03
  -8   7  -2   13.32    0.91
  -8   7  -2   11.82    0.77
  -9  -7  -2   15.90    1.06
  -9   7  -2   17.15    1.10
  -9   7  -2   17.77    0.97
 -10  -7  -2    6.69    0.87
 -10   7  -2    4.99    0.65
 -10  -8   2    0.94    0.52
 -10   8   2    1.26    0.48
  -9  -8   2    0.96    0.46
   9   8  -2    1.44    0.58
  -9   8   2    1.08    0.45
  -8  -8   2    5.73    0.79
  -8   8   2    5.15    0.70
   8   8  -2    4.85    0.73
  -7  -8   2    0.78    0.38
   7  -8  -2    0.79    0.37
  -7   8   2    0.01    0.28
   7   8  -2    0.06    0.38
  -7   8   2    0.56    0.25
   6  -8  -2   16.91    0.93
  -6  -8   2   14.61    0.95
   6   8  -2   16.45    1.02
  -6   8   2   14.53    0.89
   5  -8  -2   60.02    1.75
  -5  -8   2   68.09    1.92
  -5   8   2   62.26    1.79
   5   8  -2   66.88    1.94
  -4  -8   2    0.20    0.27
   4  -8  -2    0.27    0.23
   4   8  -2    0.45    0.31
  -4   8   2    0.25    0.23
   3  -8  -2    1.04    0.29
  -3  -8   2    0.79    0.32
   3   8  -2    1.29    0.39
  -3   8   2    0.93    0.30
   2  -8  -2    2.37    0.40
  -2  -8   2    2.21    0.38
  -2   8   2    3.25    0.45
   2   8  -2    2.04    0.37
  -1  -8   2    6.87    0.62
   1  -8  -2    7.23    0.64
  -1   8   2    7.96    0.59
   1   8  -2    7.07    0.57
   0  -8   2   13.81    0.70
   0  -8  -2   13.43    0.74
   0   8  -2   14.18    0.73
   0   8   2   14.11    0.74
  -1  -8  -2   88.41    2.06
   1  -8   2   91.48    1.96
  -1   8  -2   90.87    1.95
   1   8   2   87.90    2.02
   2  -8   2   63.99    1.56
  -2  -8  -2   63.63    1.68
   2   8   2   66.17    1.70
  -2   8  -2   60.40    1.53
  -3  -8  -2   22.06    0.99
   3  -8   2   21.93    0.86
  -3  -8  -2   23.00    0.76
   3   8   2   22.89    1.00
  -3   8  -2   23.42    0.88
   4  -8   2   -0.15    0.19
  -4  -8  -2    0.11    0.15
  -4  -8  -2    0.10    0.26
  -4   8  -2    0.07    0.21
   4   8   2    0.16    0.28
  -5  -8  -2    2.42    0.47
  -5   8  -2    1.90    0.36
  -5   8  -2    2.13    0.42
   5   8   2    2.27    0.48
  -6  -8  -2   13.74    0.88
   6   8   2   12.31    0.86
  -6   8  -2   12.70    0.83
  -6   8  -2   12.54    0.74
  -7  -8  -2    4.99    0.70
  -7   8  -2    4.52    0.63
  -7   8  -2    6.45    0.65
  -8  -8  -2    9.35    0.93
  -8   8  -2    9.29    0.89
  -8   8  -2    7.37    0.73
  -9  -8  -2    0.26    0.37
  -9   8  -2    0.07    0.28
 -10  -8  -2    1.83    0.54
 -10   8  -2    0.89    0.38
 -10  -9   2    1.61    0.61
 -10   9   2    2.28    0.59
  -9  -9   2    0.42    0.41
  -9   9   2    0.26    0.32
   9   9  -2   -0.24    0.41
  -8  -9   2    2.02    0.55
  -8   9   2    1.51    0.45
   8   9  -2    1.67    0.57
  -7  -9   2   25.20    1.32
  -7   9   2   24.89    1.23
   7   9  -2   24.43    1.34
  -6  -9   2   49.90    1.77
   6  -9  -2   52.08    1.70
  -6   9   2   53.97    1.76
   6   9  -2   54.13    1.84
  -5  -9   2   43.99    1.58
   5  -9  -2   46.17    1.54
  -5   9   2   43.48    1.52
   5   9  -2   42.54    1.58
   4  -9  -2   -0.29    0.24
  -4  -9   2    0.32    0.28
  -4   9   2    0.04    0.27
   4   9  -2    0.18    0.30
   3  -9  -2   13.98    0.83
  -3  -9   2   16.27    0.87
  -3   9   2   15.62    0.86
   3   9  -2   15.81    0.89
  -2  -9   2   -0.17    0.23
   2  -9  -2   -0.31    0.21
   2   9  -2    0.32    0.30
  -2   9   2    0.20    0.26
  -1  -9   2   11.04    0.69
   1  -9  -2   13.05    0.77
  -1   9   2   12.13    0.73
   1   9  -2   12.82    0.74
   0  -9  -2   24.96    1.03
   0  -9   2   23.88    0.98
   0   9  -2   23.99    0.99
   0   9   2   23.43    0.99
  -1  -9  -2    1.47    0.37
   1  -9   2    1.37    0.31
  -1   9  -2    0.75    0.27
   1   9   2    0.84    0.30
  -2  -9  -2   39.36    1.35
   2  -9   2   36.52    1.21
   2   9   2   37.76    1.32
  -2   9  -2   39.54    1.24
  -3  -9  -2   10.47    0.54
   3  -9   2   11.48    0.67
  -3  -9  -2   11.27    0.77
  -3   9  -2   10.40    0.66
   3   9   2   11.11    0.74
  -4  -9  -2   37.89    1.40
  -4   9  -2   37.71    1.26
   4   9   2   38.80    1.42
  -5  -9  -2    6.26    0.72
  -5   9  -2    6.38    0.62
   5   9   2    5.12    0.65
  -5   9  -2    6.40    0.71
  -6  -9  -2   -0.01    0.25
  -6   9  -2    0.08    0.25
  -6   9  -2    0.49    0.29
   6   9   2   -0.05    0.28
  -7  -9  -2   10.91    0.99
  -7   9  -2   10.76    0.85
  -8  -9  -2    2.29    0.55
  -8   9  -2    2.02    0.44
  -8   9  -2    3.58    0.62
  -9  -9  -2    4.43    0.74
  -9   9  -2    5.42    0.66
 -10 -10   2    1.39    0.61
 -10  10   2    1.96    0.57
  -9 -10   2    7.12    0.97
  -9  10   2    6.49    0.88
   9  10  -2    4.73    0.94
  -8 -10   2    1.00    0.48
   8  10  -2    0.92    0.52
  -7 -10   2   -0.17    0.32
   7  10  -2    0.09    0.36
  -7  10   2   -0.37    0.26
  -6 -10   2   28.79    1.40
   6 -10  -2   29.35    1.32
  -6  10   2   28.21    1.31
   6  10  -2   29.86    1.46
  -5 -10   2   17.44    1.05
   5 -10  -2   17.75    1.00
   5  10  -2   18.57    1.13
  -5  10   2   16.66    0.99
  -4 -10   2    0.22    0.29
   4 -10  -2    0.74    0.36
   4  10  -2    0.34    0.35
  -4  10   2    1.02    0.38
  -3 -10   2    8.17    0.79
   3 -10  -2    8.30    0.81
  -3  10   2    7.91    0.77
   3  10  -2    7.79    0.80
  -2 -10   2    1.11    0.39
   2 -10  -2    0.82    0.35
   2  10  -2    1.30    0.40
  -2  10   2    0.91    0.34
  -1 -10   2   16.03    0.86
   1 -10  -2   13.73    0.86
  -1  10   2   12.68    0.82
   1  10  -2   13.20    0.80
   0 -10   2    5.42    0.60
   0 -10  -2    3.55    0.54
   0  10   2    5.64    0.66
   0  10  -2    4.40    0.56
  -1 -10  -2    1.42    0.39
   1 -10   2    0.59    0.31
   1  10   2    0.67    0.34
  -1  10  -2    1.17    0.38
   2 -10   2    6.34    0.64
  -2 -10  -2    6.83    0.72
   2  10   2    5.66    0.67
  -2  10  -2    5.40    0.57
  -3 -10  -2   13.86    0.64
   3 -10   2   12.28    0.74
  -3 -10  -2   13.52    0.88
   3  10   2   13.62    0.89
  -3  10  -2   14.26    0.81
  -4 -10  -2    0.37    0.31
   4  10   2    0.10    0.32
  -4  10  -2    0.33    0.27
  -5 -10  -2    9.31    0.93
  -5  10  -2    8.80    0.67
  -5  10  -2    8.21    0.84
   5  10   2    9.00    0.90
  -6 -10  -2    2.53    0.51
   6  10   2    2.20    0.51
  -6  10  -2    2.96    0.50
  -6  10  -2    1.88    0.44
  -7 -10  -2    2.00    0.52
  -7  10  -2    1.40    0.45
  -7  10  -2    0.91    0.34
  -8 -10  -2    1.69    0.51
  -8  10  -2    1.38    0.47
  -8  10  -2    1.09    0.39
  -9 -10  -2   13.63    1.09
  -9  10  -2   13.23    0.94
  -9 -11   2    5.23    0.91
  -9  11   2    5.23    0.83
  -8 -11   2    0.26    0.43
   8  11  -2    0.65    0.51
  -8  11   2    0.52    0.37
  -7 -11   2    2.18    0.59
   7  11  -2    1.98    0.56
  -7  11   2    2.59    0.58
   6 -11  -2    0.82    0.40
  -6 -11   2    0.84    0.42
  -6  11   2    0.62    0.37
   6  11  -2    1.77    0.55
   5 -11  -2   28.06    1.30
  -5 -11   2   26.70    1.31
  -5  11   2   26.40    1.27
   4 -11  -2   14.06    0.93
  -4 -11   2   11.69    0.91
   4  11  -2   12.64    0.97
  -4  11   2   14.32    0.94
   3 -11  -2    0.13    0.27
  -3 -11   2   -0.21    0.25
   3  11  -2   -0.04    0.32
  -3  11   2   -0.17    0.21
   2 -11  -2   39.14    1.47
  -2 -11   2   39.38    1.47
   2  11  -2   37.37    1.46
  -2  11   2   39.62    1.47
   1 -11  -2    9.41    0.87
  -1 -11   2    9.25    0.74
  -1  11   2    9.81    0.89
   1  11  -2    8.37    0.79
   0 -11  -2   12.73    0.87
   0 -11   2   11.28    0.77
   0  11   2   12.60    0.86
   0  11  -2   12.10    0.80
  -1 -11  -2   45.85    1.60
   1 -11   2   41.16    1.44
  -1  11  -2   45.55    1.51
   1  11   2   43.45    1.54
   2 -11   2   50.91    1.61
  -2 -11  -2   50.84    1.72
   2  11   2   53.57    1.75
  -2  11  -2   48.99    1.58
  -3 -11  -2    7.67    0.81
   3  11   2    6.53    0.78
  -3  11  -2    5.73    0.62
  -4 -11  -2   18.81    1.08
  -4  11  -2   21.80    1.04
   4  11   2   18.99    1.08
  -5 -11  -2    0.41    0.31
  -5  11  -2    0.34    0.31
   5  11   2    0.27    0.36
  -6 -11  -2   -0.18    0.31
  -6  11  -2   -0.22    0.27
  -6  11  -2    0.25    0.30
   6  11   2    0.41    0.40
  -7 -11  -2   12.40    1.01
  -7  11  -2   10.23    0.98
  -7  11  -2   11.98    0.85
  -8 -11  -2    0.37    0.41
  -8  11  -2    0.15    0.32
  -8  11  -2   -0.01    0.38
  -9 -12   2    1.79    0.58
  -9  12   2    0.62    0.45
  -8 -12   2    3.45    0.74
   8  12  -2    2.36    0.69
  -8  12   2    2.91    0.66
  -7 -12   2    9.08    1.06
  -7  12   2    7.11    0.89
   7  12  -2    7.97    1.05
  -6 -12   2    0.42    0.40
  -6  12   2   -0.04    0.32
   6  12  -2    0.69    0.49
   5 -12  -2    1.38    0.45
  -5 -12   2    1.33    0.48
  -5  12   2    1.00    0.40
   5  12  -2    1.12    0.50
   4 -12  -2   -0.51    0.27
  -4 -12   2    0.01    0.32
   4  12  -2   -0.13    0.36
  -4  12   2    0.32    0.34
  -3 -12   2    3.77    0.64
   3 -12  -2    2.98    0.58
   3  12  -2    3.73    0.62
  -3  12   2    3.14    0.57
   2 -12  -2   16.51    1.01
  -2 -12   2   18.47    1.06
   2  12  -2   18.72    1.09
  -2  12   2   15.20    0.98
   1 -12  -2    0.25    0.33
  -1 -12   2    1.16    0.40
  -1  12   2    0.30    0.33
   1  12  -2    0.65    0.38
   0 -12  -2    2.88    0.56
   0 -12   2    2.45    0.47
   0  12   2    1.96    0.51
   0  12  -2    1.34    0.40
   1 -12   2    1.38    0.39
  -1 -12  -2    1.07    0.42
  -1  12  -2    0.73    0.33
   1  12   2    1.81    0.49
   2 -12   2    2.59    0.53
  -2 -12  -2    3.78    0.59
  -2  12  -2    3.33    0.56
   2  12   2    3.04    0.54
  -3 -12  -2    3.43    0.61
  -3  12  -2    2.52    0.50
   3  12   2    2.40    0.52
  -4 -12  -2   -0.44    0.27
   4  12   2    0.03    0.28
  -4  12  -2   -0.22    0.27
  -5 -12  -2    0.00    0.34
   5  12   2    0.33    0.38
  -5  12  -2    0.04    0.28
  -6 -12  -2    0.65    0.38
  -6  12  -2    0.19    0.31
  -6  12  -2   -0.07    0.27
  -7 -12  -2    0.21    0.38
  -7  12  -2   -0.02    0.33
  -7  12  -2    0.22    0.31
  -8 -12  -2    4.97    0.84
  -8  12  -2    3.73    0.71
  -8 -13   2    2.68    0.71
   8  13  -2    1.21    0.57
  -8  13   2    2.28    0.62
  -7 -13   2    5.63    0.84
   7  13  -2    4.94    0.82
  -7  13   2    5.49    0.84
  -6 -13   2    1.14    0.46
  -6  13   2    3.04    0.64
   6  13  -2    1.68    0.57
   5 -13  -2    4.33    0.74
  -5 -13   2    3.58    0.68
   5  13  -2    3.65    0.70
  -5  13   2    3.62    0.68
  -4 -13   2    2.62    0.60
   4 -13  -2    1.89    0.53
   4  13  -2    1.48    0.56
  -4  13   2    1.35    0.48
   3 -13  -2    0.16    0.34
  -3 -13   2    0.81    0.42
  -3  13   2    0.48    0.35
   3  13  -2    0.47    0.43
  -2 -13   2   11.43    0.89
   2 -13  -2   10.43    1.00
  -2  13   2    9.74    0.95
   2  13  -2   11.08    0.90
  -1 -13   2    1.19    0.41
   1 -13  -2    1.25    0.43
  -1  13   2    0.35    0.35
   1  13  -2    1.45    0.47
   0 -13   2    1.13    0.38
   0 -13  -2    0.58    0.36
   0  13  -2    0.91    0.40
   0  13   2    1.15    0.42
  -1 -13  -2    1.34    0.47
   1 -13   2    1.54    0.41
   1  13   2    1.95    0.49
  -1  13  -2    2.47    0.50
   2 -13   2   -0.10    0.28
  -2 -13  -2    0.51    0.38
   2  13   2    0.68    0.40
  -2  13  -2    0.26    0.33
  -3 -13  -2   11.96    0.94
   3  13   2    7.80    0.86
  -3  13  -2   11.98    0.88
  -4 -13  -2    0.58    0.43
   4  13   2    0.78    0.46
  -4  13  -2    1.05    0.43
  -5 -13  -2   15.72    1.14
   5  13   2   14.34    1.11
  -5  13  -2   14.90    0.97
  -6 -13  -2    0.59    0.44
  -6  13  -2    0.45    0.36
  -6  13  -2    0.26    0.36
  -7 -13  -2   10.49    1.16
  -7  13  -2    9.43    1.01
  -7  13  -2    8.63    0.89
  -7 -14   2    3.76    0.78
   7  14  -2    2.08    0.63
  -7  14   2    3.03    0.71
  -6 -14   2    4.84    0.84
  -6  14   2    4.79    0.78
   6  14  -2    4.24    0.81
  -5 -14   2    4.07    0.74
   5 -14  -2    6.25    0.90
   5  14  -2    5.05    0.82
  -5  14   2    6.07    0.84
   4 -14  -2    0.47    0.46
  -4 -14   2    0.56    0.46
  -4  14   2    0.62    0.44
   4  14  -2   -0.04    0.41
  -3 -14   2    0.67    0.43
   3 -14  -2    0.17    0.40
   3  14  -2    0.92    0.48
  -3  14   2    0.49    0.43
   2 -14  -2    0.53    0.43
  -2 -14   2    0.93    0.43
  -2  14   2    0.81    0.44
   2  14  -2    0.41    0.41
  -1 -14   2    0.44    0.37
   1 -14  -2    0.76    0.44
   1  14  -2    0.92    0.45
  -1  14   2    1.15    0.48
   0 -14  -2   13.26    1.03
   0 -14   2   13.18    0.98
   0  14  -2   16.73    1.09
   0  14   2   15.86    1.11
  -1 -14  -2    4.08    0.69
   1 -14   2    3.84    0.63
  -1  14  -2    4.32    0.67
   1  14   2    4.24    0.67
  -2 -14  -2    0.50    0.42
  -2  14  -2    0.37    0.36
   2  14   2    0.26    0.41
  -3 -14  -2    2.27    0.59
   3  14   2    1.77    0.56
  -3  14  -2    1.67    0.49
  -4 -14  -2   -0.65    0.23
  -4  14  -2    0.10    0.35
   4  14   2   -0.17    0.31
  -5 -14  -2    0.34    0.39
   5  14   2    0.64    0.46
  -5  14  -2    0.45    0.40
  -6 -14  -2    4.18    0.78
  -6  14  -2    3.34    0.63
  -6  14  -2    2.49    0.58
  -7 -14  -2    1.56    0.60
  -7  14  -2    0.49    0.40
  -7  14  -2    1.11    0.51
  -6 -15   2   -0.28    0.39
  -6  15   2    0.25    0.44
   6  15  -2   -0.43    0.41
  -5 -15   2   14.83    1.18
  -5  15   2   14.18    1.14
   5  15  -2   12.02    1.23
   4 -15  -2   -0.34    0.37
  -4 -15   2    0.12    0.36
  -4  15   2    0.82    0.48
   4  15  -2   -0.49    0.31
   3 -15  -2   14.23    1.09
  -3 -15   2   15.05    1.36
  -3  15   2   10.65    1.05
   3  15  -2   15.08    1.19
   2 -15  -2   16.60    1.15
  -2 -15   2   15.67    1.15
  -2  15   2   15.41    1.11
   2  15  -2   12.77    1.19
  -1 -15   2    2.90    0.62
   1 -15  -2    2.34    0.64
  -1  15   2    2.78    0.64
   1  15  -2    2.78    0.64
   0 -15  -2   27.24    1.46
   0 -15   2   27.49    1.42
   0  15   2   27.61    1.45
   0  15  -2   29.96    1.50
   1 -15   2   20.10    1.19
  -1 -15  -2   20.19    1.25
   1  15   2   19.49    1.25
  -1  15  -2   19.50    1.23
  -2 -15  -2    0.87    0.45
   2  15   2    0.98    0.50
  -2  15  -2    1.34    0.51
  -3 -15  -2    1.87    0.61
   3  15   2    1.59    0.55
  -3  15  -2    1.30    0.47
  -4 -15  -2    0.83    0.52
   4  15   2    0.12    0.42
  -4  15  -2   -0.03    0.35
  -5 -15  -2    8.21    1.06
  -5  15  -2    8.12    0.93
   5  15   2    9.65    1.13
  -6 -15  -2    0.45    0.46
  -6  15  -2   -0.03    0.37
  -6  15  -2    0.80    0.44
  -5 -16   2    0.87    0.56
   5  16  -2    0.81    0.61
  -5  16   2    1.10    0.53
  -4 -16   2    5.65    0.95
   4 -16  -2    4.08    0.77
  -4  16   2    2.71    0.67
   4  16  -2    4.57    0.88
  -3 -16   2    2.71    0.68
   3 -16  -2    2.43    0.62
  -3  16   2    0.98    0.48
   3  16  -2    2.00    0.61
  -2 -16   2   11.74    1.18
   2 -16  -2   13.65    1.32
   2  16  -2   12.22    1.21
  -2  16   2   12.43    1.25
  -1 -16   2   17.77    1.24
   1 -16  -2   17.49    1.28
  -1  16   2   17.98    1.29
   1  16  -2   17.00    1.25
   0 -16   2    5.04    0.81
   0 -16  -2    3.05    0.72
   0  16   2    3.25    0.75
   0  16  -2    2.83    0.65
  -1 -16  -2    2.30    0.63
   1  16   2    2.25    0.64
  -1  16  -2    1.93    0.54
  -2 -16  -2   -0.10    0.45
  -2  16  -2   -0.26    0.34
   2  16   2    0.03    0.39
  -3 -16  -2    2.45    0.69
   3  16   2    1.38    0.59
  -3  16  -2    1.20    0.50
  -4 -16  -2    0.87    0.57
   4  16   2    0.57    0.52
  -4  16  -2    0.49    0.43
  -5 -16  -2    1.90    0.66
  -5  16  -2    1.11    0.51
   5  16   2    2.31    0.70
  -4 -17   2    2.91    0.70
   4  17  -2    3.55    0.81
  -4  17   2    4.69    0.87
  -3 -17   2    2.86    0.74
   3 -17  -2    2.46    0.73
   3  17  -2    2.72    0.73
  -3  17   2    3.61    0.78
   2 -17  -2    8.08    1.07
  -2 -17   2    6.94    0.95
   2  17  -2    8.21    1.06
  -2  17   2    6.70    0.99
  -1 -17   2    2.29    0.61
   1 -17  -2    3.12    0.72
  -1  17   2    2.32    0.63
   1  17  -2    2.69    0.66
   0 -17   2    2.75    0.68
   0 -17  -2    5.43    0.94
   0  17  -2    3.45    0.70
   0  17   2    4.53    0.92
  -1 -17  -2    0.81    0.59
   1  17   2   -0.09    0.49
  -1  17  -2    1.73    0.59
  -2 -17  -2    0.41    0.52
   2  17   2    0.20    0.52
  -2  17  -2   -0.05    0.41
  -3 -17  -2    0.29    0.49
   3  17   2    0.10    0.46
  -3  17  -2    0.25    0.43
  -4 -17  -2    4.46    0.85
   4  17   2    4.24    0.83
  -4  17  -2    5.81    0.89
  -2 -18   2   -0.36    0.45
   2 -18  -2    0.93    0.61
  -2  18   2    0.75    0.53
   2  18  -2    1.19    0.62
  -1 -18   2    1.68    0.64
   1 -18  -2    0.53    0.55
  -1  18   2    1.43    0.69
   1  18  -2    0.70    0.53
   0 -18  -2    2.51    0.74
   0  18   2    1.54    0.63
   0  18  -2    0.52    0.52
  -1 -18  -2   -0.76    0.38
  -1  18  -2   -0.51    0.40
   1  18   2    0.87    0.52
 -11   0   3   17.37    1.19
 -10   0   3   -0.41    0.22
  -9   0   3    2.17    0.50
   9   0  -3    2.55    0.55
  -8   0   3    0.23    0.26
   8   0  -3    0.06    0.29
  -7   0   3    0.91    0.32
   7   0  -3    0.52    0.28
  -6   0   3    0.17    0.23
   6   0  -3    0.04    0.22
   5   0  -3   78.84    1.81
  -5   0   3   78.29    1.80
   4   0  -3    0.24    0.21
  -4   0   3    0.16    0.19
  -3   0   3   25.72    0.78
   3   0  -3   25.09    0.77
   2   0  -3    0.02    0.04
  -2   0   3    0.14    0.13
   2   0  -3   -0.15    0.12
   1   0  -3  107.10    1.56
   1   0  -3  105.76    1.70
  -1   0   3  109.93    1.72
   1   0  -3  109.33    1.78
   0   0  -3   -0.41    0.11
   0   0  -3   -0.39    0.09
   0   0  -3   -0.65    0.10
  -1   0  -3  663.21    8.68
  -1   0  -3  652.50    9.39
  -2   0  -3    0.13    0.06
  -2   0  -3    0.05    0.12
  -2   0  -3    0.14    0.13
  -3   0  -3   78.43    1.62
  -3   0  -3   76.92    1.62
  -3   0  -3   77.02    1.24
  -4   0  -3    0.24    0.17
  -4   0  -3   -0.09    0.13
  -4   0  -3   -0.02    0.10
  -5   0  -3  201.31    3.53
  -5   0  -3  202.11    3.12
  -5   0  -3  205.62    3.54
  -6   0  -3   -0.08    0.19
  -6   0  -3    0.08    0.16
  -6   0  -3    0.02    0.22
  -7   0  -3    0.01    0.22
  -7   0  -3    0.27    0.25
  -7   0  -3    0.11    0.18
  -8   0  -3   -0.26    0.18
  -9   0  -3   -0.10    0.23
 -10   0  -3    0.34    0.27
 -11  -1   3    1.04    0.48
 -11   1   3    0.64    0.39
 -10  -1   3    0.05    0.32
 -10   1   3    0.18    0.33
   9  -1  -3    0.04    0.25
  -9  -1   3   -0.11    0.26
   9   1  -3    0.12    0.31
  -9   1   3    0.48    0.30
   8  -1  -3    0.90    0.35
  -8  -1   3    0.15    0.27
  -8   1   3    0.44    0.31
   8   1  -3    0.40    0.34
  -7  -1   3    3.57    0.53
   7  -1  -3    3.71    0.55
  -7   1   3    4.12    0.55
   7   1  -3    4.03    0.55
   6  -1  -3    8.65    0.61
  -6  -1   3    8.92    0.64
   6   1  -3    8.98    0.64
  -6   1   3    8.80    0.61
   5  -1  -3    4.93    0.50
  -5  -1   3    3.95    0.45
   5   1  -3    4.02    0.44
  -5   1   3    4.16    0.48
  -4  -1   3  124.85    2.35
   4  -1  -3  129.04    2.37
  -4   1   3  127.29    2.36
   4   1  -3  123.92    2.35
  -3  -1   3    7.71    0.44
   3  -1  -3    7.18    0.43
   3   1  -3    7.42    0.45
  -3   1   3    8.12    0.45
  -2  -1   3  138.34    2.26
   2  -1  -3  143.21    2.29
   2   1  -3  142.48    2.29
  -2   1   3  138.61    1.85
  -1  -1   3   78.41    1.34
   1  -1  -3   79.50    1.37
   1   1  -3   78.12    1.24
  -1   1   3   81.15    1.38
   1   1  -3   80.23    1.37
   1   1  -3   80.07    1.36
   0  -1  -3  165.48    2.38
   0  -1  -3  165.65    2.58
   0  -1  -3  163.83    2.42
   0   1  -3  168.77    2.45
   0   1  -3  162.34    2.54
   0   1  -3  169.25    2.31
  -1  -1  -3  117.75    1.70
  -1  -1  -3  119.60    2.00
  -1  -1  -3  117.17    1.92
  -1   1  -3  114.95    1.99
  -1   1  -3  114.68    1.92
  -2  -1  -3    1.25    0.21
  -2  -1  -3    1.78    0.17
  -2  -1  -3    2.36    0.28
  -2   1  -3    1.72    0.25
  -2   1  -3    1.82    0.25
  -3  -1  -3  160.00    2.76
  -3  -1  -3  165.92    2.44
  -3  -1  -3  162.86    2.77
  -3   1  -3  160.62    2.30
  -3   1  -3  170.03    2.88
  -3   1  -3  168.87    2.80
  -4  -1  -3   14.21    0.67
  -4  -1  -3   15.11    0.65
  -4  -1  -3   13.95    0.50
  -4   1  -3   13.55    0.44
  -4   1  -3   14.29    0.68
  -4   1  -3   14.29    0.68
  -5  -1  -3    0.20    0.22
  -5  -1  -3    0.18    0.15
  -5  -1  -3    0.71    0.22
  -5   1  -3    0.10    0.17
   5   1   3    0.25    0.16
  -5   1  -3    0.04    0.13
  -5   1  -3    0.31    0.22
  -6  -1  -3   39.44    1.07
  -6  -1  -3   37.36    1.22
  -6  -1  -3   37.42    1.26
  -6   1  -3   37.65    1.29
  -6   1  -3   35.38    1.24
  -6   1  -3   37.60    1.00
  -7  -1  -3    8.96    0.57
  -7  -1  -3    9.20    0.67
  -7   1  -3    9.28    0.69
  -7   1  -3    9.47    0.70
  -7   1  -3    9.58    0.55
  -8  -1  -3    1.05    0.30
  -8   1  -3    1.72    0.43
  -8   1  -3    1.22    0.31
  -9  -1  -3    5.26    0.60
  -9   1  -3    5.10    0.56
 -10  -1  -3   11.99    0.81
 -10   1  -3   11.56    0.77
 -11  -2   3    0.31    0.38
 -11   2   3   -0.54    0.26
 -10  -2   3    4.44    0.73
 -10   2   3    5.26    0.74
  -9  -2   3    0.86    0.38
   9  -2  -3   -0.34    0.28
  -9   2   3    0.19    0.31
   9   2  -3    1.03    0.42
  -8  -2   3   -0.17    0.23
   8  -2  -3    0.02    0.25
  -8   2   3    0.43    0.29
   8   2  -3   -0.20    0.24
   7  -2  -3   30.43    1.20
  -7  -2   3   30.96    1.24
  -7   2   3   31.83    1.24
   7   2  -3   32.27    1.26
   6  -2  -3   -0.35    0.19
  -6  -2   3   -0.04    0.19
   6   2  -3    0.31    0.25
  -6   2   3   -0.10    0.10
  -6   2   3   -0.09    0.20
  -5  -2   3   15.79    0.76
   5  -2  -3   16.83    0.77
   5   2  -3   15.96    0.78
  -5   2   3   17.48    0.79
  -5   2   3   17.51    0.45
   4  -2  -3   44.15    1.19
  -4  -2   3   43.51    1.20
  -4   2   3   44.28    0.76
  -4   2   3   45.46    1.21
   4   2  -3   46.40    1.24
  -3  -2   3    5.46    0.38
   3  -2  -3    5.20    0.39
   3   2  -3    5.32    0.39
  -3   2   3    5.39    0.40
   2  -2  -3    1.23    0.23
  -2  -2   3    1.39    0.22
   2   2  -3    1.39    0.16
  -2   2   3    1.30    0.22
   2   2  -3    1.16    0.22
  -1  -2   3   97.77    1.64
   1  -2  -3   99.08    1.69
   1   2  -3  100.15    1.66
  -1   2   3  100.42    1.69
   1   2  -3  101.55    1.62
   0  -2  -3   85.52    1.55
   0  -2  -3   83.54    1.42
   0   2   3   82.77    1.40
   0   2  -3   83.44    1.44
   0   2  -3   84.09    1.32
  -1  -2  -3   87.96    1.62
  -1  -2  -3   87.89    1.45
  -1   2  -3   87.11    1.64
  -1   2  -3   88.13    1.27
  -1   2  -3   90.01    1.60
  -2  -2  -3   42.27    1.02
  -2  -2  -3   41.63    0.87
  -2   2  -3   43.44    1.06
  -2   2  -3   43.52    0.68
  -2   2  -3   41.83    1.08
  -3  -2  -3  283.90    4.07
  -3  -2  -3  286.84    4.33
  -3   2  -3  282.81    3.84
   3   2   3  296.91    4.22
  -3   2  -3  278.96    4.45
  -3   2  -3  282.35    4.34
  -4  -2  -3  199.76    3.32
  -4  -2  -3  193.45    3.07
   4   2   3  199.20    3.08
  -4   2  -3  200.90    2.91
  -4   2  -3  200.55    3.48
  -4   2  -3  203.24    3.40
  -5  -2  -3   -0.06    0.15
  -5  -2  -3    0.05    0.16
  -5   2  -3    0.05    0.20
   5   2   3    0.12    0.16
  -5   2  -3    0.24    0.23
  -5   2  -3    0.12    0.13
  -6  -2  -3    5.64    0.50
  -6  -2  -3    4.34    0.48
  -6   2  -3    4.47    0.52
  -6   2  -3    4.97    0.38
  -6   2  -3    5.57    0.61
  -7  -2  -3   14.73    0.78
  -7  -2  -3   14.80    0.74
  -7   2  -3   16.55    0.90
  -7   2  -3   16.40    0.69
  -8  -2  -3   10.67    0.72
  -8  -2  -3   11.36    0.70
  -8   2  -3   10.88    0.80
  -8   2  -3   11.16    0.64
  -9  -2  -3    3.52    0.51
  -9   2  -3    4.93    0.55
  -9   2  -3    3.32    0.57
 -10  -2  -3    4.48    0.59
 -10   2  -3    4.12    0.60
 -11  -3   3    4.15    0.75
 -11   3   3    2.29    0.58
 -10  -3   3    0.61    0.40
 -10   3   3    0.56    0.39
  -9  -3   3    1.58    0.46
   9   3  -3    2.06    0.50
  -9   3   3    1.45    0.46
  -8  -3   3    3.52    0.56
   8  -3  -3    3.19    0.57
   8   3  -3    3.58    0.59
  -8   3   3    2.98    0.50
  -7  -3   3    1.07    0.35
   7  -3  -3    1.57    0.37
   7   3  -3    1.88    0.41
  -7   3   3    1.77    0.39
   6  -3  -3    7.76    0.61
  -6  -3   3    5.72    0.60
   6   3  -3    5.76    0.60
  -6   3   3    6.97    0.57
  -6   3   3    6.88    0.35
  -5  -3   3   17.19    0.80
   5  -3  -3   15.80    0.75
  -5   3   3   17.75    0.50
  -5   3   3   15.10    0.74
   5   3  -3   16.28    0.79
   4  -3  -3   11.26    0.60
  -4  -3   3   10.78    0.60
   4   3  -3   10.89    0.62
  -4   3   3   10.38    0.59
   3  -3  -3   15.87    0.65
  -3  -3   3   13.71    0.60
  -3   3   3   15.04    0.63
   3   3  -3   15.00    0.36
   3   3  -3   15.27    0.64
  -2  -3   3   28.77    0.81
   2  -3  -3   32.09    0.87
   2   3  -3   30.12    0.62
  -2   3   3   29.33    0.83
   2   3  -3   30.24    0.84
   1  -3  -3   -0.23    0.13
  -1  -3   3    0.26    0.13
   1   3  -3   -0.04    0.12
  -1   3   3    0.50    0.17
   1   3  -3    0.29    0.12
   0  -3  -3   16.55    0.55
   0  -3   3   17.19    0.49
   0   3   3   17.30    0.55
   0   3  -3   17.37    0.56
   0   3  -3   16.88    0.49
  -1  -3  -3    8.86    0.40
  -1  -3  -3    9.91    0.45
   1   3   3    9.18    0.40
  -1   3  -3    8.53    0.43
  -1   3  -3    8.56    0.44
  -1   3  -3    7.78    0.30
  -2  -3  -3    2.76    0.30
  -2  -3  -3    3.36    0.30
  -2   3  -3    2.80    0.33
  -2   3  -3    2.93    0.19
   2   3   3    3.23    0.29
  -2   3  -3    2.49    0.31
  -3  -3  -3   64.98    1.42
  -3  -3  -3   68.24    1.36
  -3   3  -3   65.67    1.57
   3   3   3   71.16    1.38
  -3   3  -3   68.23    1.54
  -3   3  -3   69.70    1.17
  -4  -3  -3   80.49    1.62
  -4  -3  -3   81.67    1.70
  -4   3  -3   84.47    1.84
   4   3   3   80.45    1.62
  -4   3  -3   81.05    1.43
  -4   3  -3   78.68    1.87
  -5  -3  -3   29.82    0.98
  -5  -3  -3   30.93    0.96
   5   3   3   31.98    0.97
  -5   3  -3   32.01    1.16
  -5   3  -3   31.16    0.83
  -5   3  -3   32.68    1.12
  -6  -3  -3   10.30    0.60
  -6  -3  -3    9.71    0.60
  -6   3  -3    9.93    0.52
  -6   3  -3    8.68    0.65
  -7  -3  -3   29.28    1.06
  -7  -3  -3   26.50    1.03
  -7   3  -3   30.33    1.21
  -7   3  -3   28.07    0.93
  -8  -3  -3    0.39    0.26
  -8   3  -3    0.23    0.21
  -8   3  -3    0.05    0.24
  -9  -3  -3    0.32    0.29
  -9   3  -3    0.54    0.28
  -9   3  -3    0.76    0.37
 -10  -3  -3   10.64    0.82
 -11  -4   3    0.30    0.38
 -11   4   3   -0.03    0.37
 -10  -4   3    5.32    0.78
 -10   4   3    4.61    0.71
  -9  -4   3    1.57    0.48
  -9   4   3    1.12    0.40
   9   4  -3    2.17    0.55
  -8  -4   3    3.32    0.57
   8  -4  -3    4.16    0.58
   8   4  -3    2.96    0.57
  -8   4   3    3.10    0.55
  -7  -4   3   -0.07    0.24
   7  -4  -3   -0.34    0.22
  -7   4   3    0.10    0.25
   7   4  -3    0.30    0.31
   6  -4  -3   15.05    0.80
  -6  -4   3   16.55    0.88
  -6   4   3   14.63    0.79
  -6   4   3   15.23    0.55
   6   4  -3   15.53    0.87
   5  -4  -3   20.85    0.88
  -5  -4   3   21.94    0.93
   5   4  -3   20.45    0.90
  -5   4   3   19.91    0.59
  -4  -4   3    2.50    0.37
   4  -4  -3    2.10    0.32
  -4   4   3    2.47    0.35
   4   4  -3    2.46    0.37
   3  -4  -3    4.00    0.40
  -3  -4   3    4.49    0.43
  -3   4   3    3.47    0.37
   3   4  -3    3.84    0.41
  -2  -4   3   53.39    1.23
   2  -4  -3   50.68    1.23
   2   4  -3   52.73    0.93
  -2   4   3   55.37    1.26
   2   4  -3   52.26    1.23
  -1  -4   3   27.83    0.77
   1  -4  -3   27.39    0.81
  -1   4   3   26.88    0.79
   1   4  -3   27.40    0.78
   1   4  -3   28.16    0.67
   0  -4  -3   98.10    1.79
   0  -4   3   94.75    1.66
   0   4  -3   98.76    1.69
   0   4   3   94.30    1.75
   0   4  -3   99.24    1.74
  -1  -4  -3   63.00    1.33
  -1  -4  -3   61.82    1.30
  -1   4  -3   61.88    1.36
  -1   4  -3   61.85    1.15
   1   4   3   61.85    1.28
  -2  -4  -3    7.33    0.42
  -2  -4  -3    7.34    0.42
  -2   4  -3    6.97    0.32
   2   4   3    7.42    0.41
  -2   4  -3    7.33    0.48
  -2   4  -3    7.81    0.46
  -3  -4  -3  131.14    2.34
  -3  -4  -3  134.22    2.35
   3   4   3  137.47    2.36
  -3   4  -3  128.71    2.55
  -3   4  -3  133.95    2.10
  -3   4  -3  137.62    2.51
  -4  -4  -3    0.34    0.19
  -4  -4  -3    0.27    0.16
   4   4   3    0.29    0.19
  -4   4  -3    0.38    0.22
  -4   4  -3    0.04    0.16
  -5  -4  -3   73.85    1.65
  -5  -4  -3   72.17    1.67
  -5   4  -3   72.88    1.82
  -5   4  -3   70.90    1.90
  -5   4  -3   73.31    1.46
   5   4   3   73.06    1.67
  -6  -4  -3   44.44    1.32
  -6  -4  -3   44.72    1.28
  -6   4  -3   48.05    1.18
  -6   4  -3   45.00    1.45
  -7  -4  -3    9.58    0.67
  -7  -4  -3    9.22    0.68
  -7   4  -3   10.78    0.60
  -7   4  -3    9.64    0.73
  -8  -4  -3    0.75    0.33
  -8   4  -3    0.54    0.33
  -8   4  -3    0.78    0.28
  -9  -4  -3    2.45    0.49
  -9   4  -3    2.32    0.52
  -9   4  -3    2.13    0.40
 -10  -4  -3   10.07    0.93
 -11  -5   3    0.48    0.45
 -11   5   3    0.24    0.40
 -10  -5   3    1.35    0.52
 -10   5   3    1.41    0.47
  -9  -5   3    0.55    0.38
  -9   5   3    0.23    0.30
   9   5  -3    0.73    0.45
   8  -5  -3    1.42    0.40
  -8  -5   3    0.96    0.41
   8   5  -3    1.59    0.48
  -8   5   3    0.96    0.39
  -7  -5   3    1.13    0.37
   7  -5  -3    0.51    0.33
  -7   5   3    0.74    0.34
   7   5  -3    0.73    0.35
  -6  -5   3    0.12    0.22
   6  -5  -3   -0.16    0.23
   6   5  -3    0.35    0.28
  -6   5   3    0.28    0.16
  -6   5   3    0.18    0.27
   5  -5  -3   20.09    0.89
  -5  -5   3   19.68    0.93
   5   5  -3   22.31    0.99
  -5   5   3   20.92    0.92
  -4  -5   3   -0.12    0.18
   4  -5  -3    0.02    0.19
   4   5  -3    0.12    0.24
  -4   5   3    0.03    0.17
   3  -5  -3    0.12    0.19
  -3  -5   3    0.28    0.19
  -3   5   3    0.13    0.18
   3   5  -3   -0.05    0.18
   2  -5  -3  231.39    3.72
  -2  -5   3  230.21    3.66
   2   5  -3  229.55    3.21
  -2   5   3  222.68    3.67
   2   5  -3  229.20    3.68
   1  -5  -3    7.62    0.47
  -1  -5   3    7.28    0.43
  -1   5   3    8.01    0.46
   1   5  -3    7.67    0.35
   1   5  -3    7.30    0.45
   0  -5  -3   26.60    0.84
   0  -5   3   27.67    0.78
   0   5   3   26.16    0.82
   0   5  -3   29.02    0.81
   0   5  -3   29.52    0.80
   1  -5   3   28.88    0.77
  -1  -5  -3   28.65    0.88
  -1   5  -3   28.32    0.88
  -1   5  -3   28.52    0.77
   1   5   3   28.51    0.86
   2  -5   3    0.11    0.13
  -2  -5  -3    0.63    0.22
  -2  -5  -3    0.11    0.13
   2   5   3    0.98    0.24
  -2   5  -3    0.00    0.12
  -2   5  -3    0.38    0.17
  -3  -5  -3    1.16    0.22
  -3  -5  -3    1.40    0.29
   3  -5   3    0.94    0.18
  -3   5  -3    0.92    0.27
  -3   5  -3    0.75    0.19
  -3   5  -3    1.06    0.28
   3   5   3    0.99    0.25
  -4  -5  -3    0.29    0.18
  -4  -5  -3    0.41    0.22
   4   5   3    0.13    0.21
  -4   5  -3    0.22    0.22
  -4   5  -3    0.21    0.16
  -5  -5  -3   25.46    0.96
  -5  -5  -3   28.27    0.92
  -5   5  -3   27.60    0.83
   5   5   3   27.74    1.01
  -5   5  -3   26.64    1.07
  -6  -5  -3    1.97    0.39
  -6  -5  -3    2.21    0.34
  -6   5  -3    2.16    0.33
  -6   5  -3    2.63    0.47
  -7  -5  -3    1.60    0.39
  -7   5  -3    1.72    0.32
  -7   5  -3    1.12    0.38
  -8  -5  -3   43.10    1.50
  -8   5  -3   43.29    1.31
  -8   5  -3   41.21    1.57
  -9  -5  -3   11.31    0.86
  -9   5  -3   11.21    1.01
  -9   5  -3   12.23    0.74
 -10  -5  -3    4.55    0.70
 -11  -6   3    7.10    0.98
 -11   6   3    8.42    1.02
 -10  -6   3    2.42    0.59
 -10   6   3    0.70    0.45
  -9  -6   3   -0.16    0.33
  -9   6   3    0.49    0.34
   9   6  -3    0.00    0.36
   8  -6  -3    0.26    0.33
  -8  -6   3    0.11    0.27
   8   6  -3   -0.03    0.29
  -8   6   3   -0.10    0.26
  -7  -6   3    6.68    0.78
   7  -6  -3    5.44    0.67
   7   6  -3    5.09    0.70
  -7   6   3    4.38    0.61
   6  -6  -3    1.96    0.41
  -6  -6   3    1.96    0.42
   6   6  -3    2.04    0.46
  -6   6   3    1.27    0.38
  -6   6   3    2.38    0.32
  -5  -6   3    9.73    0.71
   5  -6  -3   10.42    0.70
  -5   6   3    9.65    0.68
   5   6  -3   10.21    0.75
  -4  -6   3   49.59    1.46
   4  -6  -3   51.13    1.45
  -4   6   3   51.34    1.46
   4   6  -3   50.84    1.50
   3  -6  -3    1.99    0.36
  -3  -6   3    2.16    0.36
  -3   6   3    3.09    0.42
   3   6  -3    2.14    0.36
   2  -6  -3   12.25    0.63
  -2  -6   3   12.14    0.62
   2   6  -3   11.99    0.64
  -2   6   3   11.32    0.60
  -1  -6   3    4.64    0.44
   1  -6  -3    4.94    0.48
   1   6  -3    4.15    0.42
  -1   6   3    4.61    0.46
   0  -6  -3    8.52    0.52
   0  -6   3    8.31    0.47
   0   6   3    7.69    0.50
   0   6  -3    7.46    0.47
   1  -6   3    1.13    0.23
  -1  -6  -3    1.38    0.29
   1   6   3    1.11    0.26
  -1   6  -3    1.58    0.27
  -1   6  -3    1.08    0.23
   2  -6   3   15.02    0.58
  -2  -6  -3   13.82    0.60
  -2  -6  -3   15.33    0.71
   2   6   3   14.83    0.68
  -2   6  -3   14.73    0.59
   3  -6   3    0.10    0.12
  -3  -6  -3    0.15    0.15
  -3  -6  -3   -0.11    0.18
   3   6   3    0.11    0.21
  -3   6  -3    0.02    0.15
  -3   6  -3    0.10    0.17
  -4  -6  -3    3.32    0.37
  -4  -6  -3    3.49    0.46
  -4   6  -3    3.14    0.35
  -4   6  -3    2.58    0.41
   4   6   3    3.16    0.43
  -5  -6  -3    4.71    0.44
  -5  -6  -3    5.42    0.58
  -5   6  -3    5.68    0.62
   5   6   3    3.71    0.48
  -5   6  -3    4.64    0.44
  -6  -6  -3    3.85    0.51
  -6   6  -3    5.27    0.62
  -6   6  -3    4.69    0.45
  -7  -6  -3    3.49    0.54
  -7   6  -3    2.59    0.50
  -7   6  -3    2.69    0.41
  -8  -6  -3    7.70    0.80
  -8   6  -3    7.51    0.59
  -8   6  -3    7.97    0.85
  -9  -6  -3    0.05    0.30
  -9   6  -3   -0.14    0.31
  -9   6  -3    0.31    0.25
 -10  -6  -3    1.18    0.48
 -11  -7   3    6.79    0.96
 -11   7   3    5.69    0.87
 -10  -7   3    1.04    0.46
 -10   7   3    0.62    0.43
  -9  -7   3    1.85    0.53
  -9   7   3    1.74    0.49
   9   7  -3    2.36    0.60
  -8  -7   3    2.83    0.57
   8  -7  -3    2.90    0.59
   8   7  -3    1.98    0.54
  -8   7   3    2.30    0.52
  -7  -7   3   -0.21    0.27
   7  -7  -3    0.24    0.29
   7   7  -3    0.07    0.37
   6  -7  -3   18.33    0.97
  -6  -7   3   17.87    1.00
  -6   7   3   16.48    0.71
   6   7  -3   18.49    1.02
  -6   7   3   17.00    0.95
   5  -7  -3    3.14    0.51
  -5  -7   3    3.53    0.51
  -5   7   3    3.26    0.51
   5   7  -3    3.56    0.53
   4  -7  -3   13.94    0.79
  -4  -7   3   13.72    0.78
  -4   7   3   14.47    0.80
   4   7  -3   15.04    0.83
  -3  -7   3    4.53    0.49
   3  -7  -3    4.13    0.48
   3   7  -3    3.84    0.47
  -3   7   3    3.85    0.48
  -2  -7   3    3.94    0.48
   2  -7  -3    3.66    0.45
  -2   7   3    3.11    0.41
   2   7  -3    3.34    0.46
   1  -7  -3    2.95    0.39
  -1  -7   3    3.44    0.40
   1   7  -3    2.94    0.38
  -1   7   3    2.80    0.37
   0  -7   3    1.63    0.30
   0  -7  -3    2.02    0.34
   0   7  -3    2.01    0.35
   0   7   3    2.36    0.37
  -1  -7  -3  311.18    4.86
   1  -7   3  300.82    4.66
   1   7   3  301.23    4.80
  -1   7  -3  304.96    4.66
  -2  -7  -3   18.24    0.73
   2  -7   3   18.09    0.71
  -2  -7  -3   20.44    0.86
  -2   7  -3   18.33    0.71
   2   7   3   17.93    0.81
   3  -7   3   15.12    0.64
  -3  -7  -3   14.48    0.64
  -3  -7  -3   15.07    0.78
   3   7   3   15.12    0.75
  -3   7  -3   16.21    0.67
  -4  -7  -3    0.95    0.23
  -4  -7  -3    0.54    0.28
   4   7   3    0.78    0.29
  -4   7  -3    0.82    0.28
  -4   7  -3    0.37    0.21
  -5  -7  -3    8.11    0.51
  -5  -7  -3    7.91    0.64
  -5   7  -3    8.02    0.54
   5   7   3    7.99    0.73
  -5   7  -3    7.95    0.76
  -6  -7  -3    0.29    0.28
  -6   7  -3    0.10    0.28
  -7  -7  -3    0.59    0.31
  -7   7  -3    0.06    0.30
  -7   7  -3    0.46    0.26
  -8  -7  -3    1.10    0.40
  -8   7  -3    1.15    0.41
  -8   7  -3    1.17    0.31
  -9  -7  -3    4.81    0.70
  -9   7  -3    3.56    0.64
  -9   7  -3    4.52    0.56
 -10  -7  -3    1.56    0.49
 -10  -8   3    1.79    0.56
 -10   8   3    2.05    0.58
  -9  -8   3    1.25    0.51
   9   8  -3    1.03    0.51
  -9   8   3    0.80    0.42
  -8  -8   3    3.58    0.62
  -8   8   3    2.46    0.55
   8   8  -3    2.28    0.58
  -7  -8   3   16.39    1.05
   7  -8  -3   16.37    1.00
   7   8  -3   16.55    1.10
  -7   8   3   14.90    0.98
  -6  -8   3   38.74    1.51
   6  -8  -3   33.27    1.34
  -6   8   3   39.10    1.45
   6   8  -3   34.95    1.47
  -5  -8   3    3.17    0.52
   5  -8  -3    2.12    0.43
  -5   8   3    3.77    0.55
   5   8  -3    2.73    0.50
   4  -8  -3   12.61    0.77
  -4  -8   3   12.73    0.79
   4   8  -3   12.05    0.80
  -4   8   3   12.26    0.76
   3  -8  -3    6.34    0.64
  -3  -8   3    4.77    0.55
   3   8  -3    5.55    0.60
  -3   8   3    6.75    0.67
  -2  -8   3    6.49    0.53
   2  -8  -3    5.72    0.59
  -2   8   3    6.91    0.55
   2   8  -3    5.17    0.54
   1  -8  -3    7.21    0.57
  -1  -8   3    8.07    0.57
   1   8  -3    8.33    0.60
  -1   8   3    7.71    0.57
   0  -8  -3   18.25    0.85
   0  -8   3   17.17    0.77
   0   8   3   18.89    0.85
   0   8  -3   17.95    0.80
   1  -8   3   69.22    1.63
  -1  -8  -3   67.79    1.74
   1   8   3   69.19    1.73
  -1   8  -3   67.78    1.62
  -2  -8  -3    0.57    0.22
   2  -8   3    0.83    0.25
  -2  -8  -3    1.17    0.33
   2   8   3    0.85    0.29
  -2   8  -3    0.82    0.26
  -3  -8  -3   18.97    0.92
  -3  -8  -3   20.22    0.78
   3  -8   3   20.50    0.80
  -3   8  -3   21.21    0.82
   3   8   3   18.15    0.90
  -4  -8  -3    9.12    0.69
  -4  -8  -3    7.39    0.50
  -4   8  -3    7.63    0.54
   4   8   3    7.88    0.75
  -4   8  -3    8.40    0.66
  -5  -8  -3    0.08    0.25
  -5   8  -3    0.00    0.20
   5   8   3    0.10    0.31
  -5   8  -3    0.30    0.29
  -6  -8  -3   12.08    0.83
  -6   8  -3   13.20    0.73
  -6   8  -3   12.84    0.87
  -7  -8  -3   -0.42    0.23
  -7   8  -3    0.20    0.30
  -7   8  -3    0.38    0.26
  -8  -8  -3   -0.25    0.29
  -8   8  -3    0.17    0.36
  -8   8  -3    0.42    0.27
  -9  -8  -3    7.89    0.90
  -9   8  -3    6.96    0.87
 -10  -9   3    4.08    0.79
 -10   9   3    4.05    0.75
  -9  -9   3    0.78    0.44
   9   9  -3    0.72    0.48
  -9   9   3    0.98    0.44
  -8  -9   3    1.35    0.48
  -8   9   3    1.56    0.47
   8   9  -3    0.17    0.43
  -7  -9   3   24.79    1.31
   7  -9  -3   26.28    1.27
  -7   9   3   23.09    1.21
   7   9  -3   26.84    1.40
  -6  -9   3   54.33    1.85
   6  -9  -3   55.19    1.79
   6   9  -3   50.12    1.82
  -6   9   3   52.42    1.78
  -5  -9   3    2.01    0.46
   5  -9  -3    1.83    0.42
  -5   9   3    2.73    0.49
   5   9  -3    2.74    0.53
  -4  -9   3    0.30    0.30
   4  -9  -3    0.46    0.31
  -4   9   3   -0.06    0.26
   4   9  -3    0.34    0.35
   3  -9  -3   16.52    0.90
  -3  -9   3   15.10    0.87
   3   9  -3   17.10    0.96
  -3   9   3   17.15    0.90
   2  -9  -3    1.36    0.35
  -2  -9   3    1.52    0.36
  -2   9   3    1.68    0.36
   2   9  -3    2.25    0.43
   1  -9  -3    8.98    0.67
  -1  -9   3   10.90    0.70
   1   9  -3   10.70    0.72
  -1   9   3   11.29    0.71
   0  -9   3   -0.04    0.20
   0  -9  -3    0.26    0.27
   0   9  -3    0.12    0.27
   0   9   3   -0.09    0.24
  -1  -9  -3    0.16    0.24
   1  -9   3    0.67    0.26
  -1   9  -3    0.16    0.24
   1   9   3    0.85    0.30
  -2  -9  -3    2.97    0.48
   2  -9   3    3.14    0.43
  -2   9  -3    3.81    0.48
   2   9   3    3.75    0.50
  -3  -9  -3    0.95    0.25
  -3  -9  -3    1.32    0.39
  -3   9  -3    1.02    0.29
   3   9   3    0.87    0.33
  -4  -9  -3   -0.03    0.28
  -4  -9  -3    0.37    0.22
   4   9   3    1.08    0.37
  -4   9  -3    0.18    0.23
  -5  -9  -3    1.15    0.38
   5   9   3    1.37    0.41
  -5   9  -3    1.38    0.35
  -5   9  -3    1.07    0.37
  -6  -9  -3   15.23    0.97
  -6   9  -3   16.87    0.84
  -6   9  -3   18.24    1.06
  -7  -9  -3    1.58    0.48
  -7   9  -3    1.62    0.38
  -7   9  -3    1.87    0.49
  -8  -9  -3    2.64    0.59
  -8   9  -3    2.25    0.44
  -8   9  -3    1.53    0.48
  -9  -9  -3   16.99    1.15
  -9   9  -3   16.48    1.17
 -10 -10   3    9.83    1.18
 -10  10   3    6.61    0.90
  -9 -10   3    1.76    0.61
  -9  10   3    1.42    0.53
   9  10  -3    0.67    0.52
  -8 -10   3    3.48    0.67
   8  10  -3    4.02    0.75
   7 -10  -3    3.79    0.65
  -7 -10   3    4.44    0.74
   7  10  -3    3.64    0.70
  -7  10   3    2.90    0.60
   6 -10  -3   31.98    1.42
  -6 -10   3   33.35    1.49
   6  10  -3   33.51    1.52
  -6  10   3   30.29    1.41
   5 -10  -3    5.92    0.72
  -5 -10   3    5.46    0.72
   5  10  -3    4.84    0.69
  -5  10   3    5.36    0.70
   4 -10  -3    0.68    0.37
  -4 -10   3    0.79    0.37
   4  10  -3    0.40    0.40
  -4  10   3    0.49    0.34
  -3 -10   3   10.78    0.80
   3 -10  -3   10.98    0.81
   3  10  -3   10.25    0.83
  -3  10   3   10.33    0.78
  -2 -10   3    7.75    0.76
   2 -10  -3    8.61    0.81
  -2  10   3    8.19    0.78
   2  10  -3    7.89    0.78
   1 -10  -3    1.40    0.42
  -1 -10   3    1.09    0.36
   1  10  -3    1.16    0.34
  -1  10   3    0.98    0.36
   0 -10   3    7.78    0.63
   0 -10  -3    7.63    0.75
   0  10   3    8.24    0.77
   0  10  -3    8.35    0.66
   1 -10   3   12.77    0.76
  -1 -10  -3   15.13    0.87
  -1  10  -3   14.26    0.80
   1  10   3   12.92    0.82
  -2 -10  -3   44.42    1.54
   2 -10   3   49.07    1.47
   2  10   3   48.73    1.59
  -2  10  -3   48.86    1.46
  -3 -10  -3    9.37    0.58
  -3 -10  -3   11.21    0.82
   3  10   3    9.82    0.75
  -3  10  -3    8.77    0.64
  -4 -10  -3    2.21    0.44
  -4  10  -3    1.99    0.40
   4  10   3    1.28    0.41
  -5 -10  -3   -0.27    0.26
  -5  10  -3    0.42    0.32
   5  10   3   -0.29    0.25
  -5  10  -3   -0.11    0.22
  -6 -10  -3   12.41    0.94
  -6  10  -3   13.73    0.83
  -6  10  -3   13.99    0.97
  -7 -10  -3    1.75    0.52
  -7  10  -3    1.88    0.51
  -8 -10  -3   35.13    1.61
  -8  10  -3   34.68    1.33
  -8  10  -3   33.99    1.57
  -9 -10  -3    9.46    1.05
  -9  10  -3    7.90    1.03
  -9 -11   3    1.35    0.60
   9  11  -3    1.07    0.60
  -9  11   3    0.28    0.43
  -8 -11   3    3.08    0.69
   8  11  -3    2.71    0.69
  -8  11   3    3.70    0.74
  -7 -11   3    1.47    0.51
  -7  11   3    2.23    0.52
   7  11  -3    1.88    0.61
  -6 -11   3    4.80    0.74
   6 -11  -3    4.13    0.69
   6  11  -3    4.88    0.77
  -6  11   3    5.25    0.75
   5 -11  -3    6.75    0.82
  -5 -11   3    7.34    0.87
  -5  11   3    4.90    0.70
   5  11  -3    6.03    0.84
  -4 -11   3    0.90    0.36
   4 -11  -3    0.39    0.33
  -4  11   3    0.70    0.34
   4  11  -3    0.87    0.41
  -3 -11   3   19.88    1.08
   3 -11  -3   16.71    1.00
  -3  11   3   19.18    1.04
   2 -11  -3   49.86    1.70
  -2 -11   3   49.03    1.65
  -2  11   3   48.24    1.66
   2  11  -3   50.90    1.71
  -1 -11   3    3.37    0.51
   1 -11  -3    4.59    0.63
   1  11  -3    3.21    0.52
  -1  11   3    3.53    0.55
   0 -11   3    3.72    0.53
   0 -11  -3    3.97    0.61
   0  11  -3    2.34    0.45
   0  11   3    3.46    0.59
  -1 -11  -3    9.27    0.89
   1 -11   3    9.34    0.71
  -1  11  -3    8.47    0.70
   1  11   3    9.53    0.78
  -2 -11  -3  143.86    3.23
   2 -11   3  145.05    3.08
   2  11   3  148.22    3.24
  -2  11  -3  145.78    3.01
  -3 -11  -3   14.44    0.95
  -3  11  -3   16.52    0.91
   3  11   3   13.41    0.92
  -4 -11  -3   19.36    1.12
   4  11   3   21.00    1.15
  -4  11  -3   20.72    0.99
  -5 -11  -3   11.31    1.03
  -5  11  -3    9.49    0.92
  -5  11  -3    6.30    0.65
   5  11   3    8.82    0.90
  -6 -11  -3    6.02    0.79
  -6  11  -3    5.86    0.77
  -6  11  -3    5.68    0.66
  -7 -11  -3    5.09    0.79
  -7  11  -3    4.89    0.75
  -7  11  -3    4.59    0.61
  -8 -11  -3    6.52    0.89
  -8  11  -3    5.34    0.67
  -8  11  -3    6.05    0.85
  -9 -12   3    0.57    0.51
   9  12  -3   -0.29    0.40
  -9  12   3    0.84    0.51
  -8 -12   3    9.52    1.15
   8  12  -3    7.98    1.10
  -8  12   3    8.99    1.02
  -7 -12   3    1.03    0.47
  -7  12   3    0.85    0.44
   7  12  -3    0.85    0.52
   6 -12  -3    3.79    0.67
  -6 -12   3    4.44    0.74
   6  12  -3    3.55    0.76
  -6  12   3    3.75    0.66
  -5 -12   3   43.61    1.77
   5 -12  -3   41.36    1.69
  -5  12   3   43.31    1.73
   5  12  -3   42.49    1.80
  -4 -12   3   19.47    1.12
   4 -12  -3   18.15    1.13
  -4  12   3   20.15    1.17
   4  12  -3   17.55    1.14
   3 -12  -3    4.42    0.65
  -3 -12   3    5.66    0.75
   3  12  -3    5.38    0.78
  -3  12   3    5.64    0.71
  -2 -12   3    0.41    0.34
   2 -12  -3   -0.06    0.29
   2  12  -3   -0.04    0.32
  -2  12   3    0.24    0.32
   1 -12  -3   14.18    0.98
  -1 -12   3   12.09    0.87
   1  12  -3   12.60    0.90
  -1  12   3   10.98    0.87
   0 -12  -3   11.11    1.00
   0 -12   3   11.71    0.83
   0  12  -3   10.22    0.81
   0  12   3    9.82    0.92
   1 -12   3    0.26    0.30
  -1 -12  -3    0.23    0.30
   1  12   3    0.03    0.28
  -1  12  -3    0.21    0.30
  -2 -12  -3   26.95    1.31
  -2  12  -3   27.41    1.20
   2  12   3   24.46    1.24
  -3 -12  -3    0.10    0.30
  -3  12  -3   -0.61    0.23
   3  12   3    0.70    0.40
  -4 -12  -3    6.10    0.81
   4  12   3    4.32    0.64
  -4  12  -3    5.08    0.63
  -5 -12  -3   12.03    1.14
  -5  12  -3   11.13    0.80
  -5  12  -3   13.33    0.98
   5  12   3   12.43    0.99
  -6 -12  -3    3.12    0.63
  -6  12  -3    2.16    0.47
  -6  12  -3    2.29    0.55
  -7 -12  -3    5.39    0.82
  -7  12  -3    6.27    0.85
  -7  12  -3    6.24    0.69
  -8 -12  -3    1.41    0.55
  -8  12  -3    0.41    0.45
  -8  12  -3    0.49    0.36
  -8 -13   3   -0.13    0.38
  -8  13   3    0.38    0.44
   8  13  -3    0.04    0.43
  -7 -13   3    3.67    0.72
   7  13  -3    3.98    0.79
  -7  13   3    3.50    0.69
  -6 -13   3   37.58    1.75
   6 -13  -3   40.28    1.76
  -6  13   3   39.94    1.78
  -5 -13   3    9.65    1.02
   5 -13  -3   12.45    1.19
  -5  13   3   13.61    1.06
   5  13  -3   10.54    1.08
   4 -13  -3    2.05    0.57
  -4 -13   3    2.26    0.58
  -4  13   3    1.59    0.51
   4  13  -3    2.48    0.63
   3 -13  -3   32.90    1.53
  -3 -13   3   35.25    1.55
  -3  13   3   33.37    1.51
   3  13  -3   32.62    1.54
  -2 -13   3    3.01    0.59
   2 -13  -3    1.83    0.48
   2  13  -3    2.14    0.55
  -2  13   3    1.34    0.42
   1 -13  -3    5.57    0.80
  -1 -13   3    5.28    0.71
  -1  13   3    3.76    0.64
   1  13  -3    5.78    0.74
   0 -13  -3    0.08    0.33
   0 -13   3    0.40    0.30
   0  13  -3    0.12    0.32
   0  13   3   -0.14    0.29
   1 -13   3   15.76    0.98
  -1 -13  -3   15.42    1.06
  -1  13  -3   13.64    0.95
   1  13   3   15.99    1.07
  -2 -13  -3    8.74    0.93
  -2  13  -3    9.05    0.88
   2  13   3    8.77    0.91
  -3 -13  -3    8.37    0.93
   3  13   3    8.77    0.97
  -3  13  -3    5.94    0.73
  -4 -13  -3    3.86    0.68
   4  13   3    4.36    0.68
  -4  13  -3    5.28    0.68
  -5 -13  -3    1.18    0.48
  -5  13  -3    1.85    0.53
   5  13   3    1.75    0.52
  -5  13  -3    1.22    0.40
  -6 -13  -3   -0.36    0.34
  -6  13  -3    0.75    0.38
  -6  13  -3    0.31    0.30
  -7 -13  -3    4.35    0.81
  -7  13  -3    2.97    0.56
  -7  13  -3    3.90    0.74
  -7 -14   3   -0.17    0.43
   7  14  -3   -0.36    0.49
  -7  14   3    0.81    0.50
  -6 -14   3    1.73    0.59
  -6  14   3    1.16    0.55
   6  14  -3    1.01    0.57
   5 -14  -3    1.52    0.56
  -5 -14   3    1.56    0.58
  -5  14   3    1.12    0.52
   5  14  -3    0.98    0.56
   4 -14  -3   16.49    1.15
  -4 -14   3   17.83    1.19
   4  14  -3   15.09    1.15
  -4  14   3   15.39    1.11
   3 -14  -3    5.21    0.82
  -3 -14   3    6.40    0.84
   3  14  -3    5.13    0.79
  -3  14   3    3.86    0.71
   2 -14  -3    0.63    0.42
  -2 -14   3    0.24    0.31
  -2  14   3    0.95    0.47
   2  14  -3    0.63    0.40
   1 -14  -3   -0.28    0.29
  -1 -14   3   -0.12    0.30
  -1  14   3    0.35    0.36
   1  14  -3    0.07    0.34
   0 -14   3    1.07    0.41
   0 -14  -3    1.49    0.51
   0  14   3    1.27    0.49
   0  14  -3    0.92    0.40
  -1 -14  -3   -0.10    0.34
   1  14   3    0.54    0.41
  -1  14  -3    0.31    0.36
  -2 -14  -3    3.85    0.68
   2  14   3    3.11    0.64
  -2  14  -3    3.69    0.64
  -3 -14  -3    3.64    0.68
   3  14   3    3.79    0.68
  -3  14  -3    4.75    0.69
  -4 -14  -3   14.27    1.09
   4  14   3   16.76    1.19
  -4  14  -3   12.62    0.95
  -5 -14  -3   13.41    1.24
  -5  14  -3   12.58    0.94
  -6 -14  -3   -0.44    0.36
  -6  14  -3    0.48    0.39
  -6  14  -3   -0.14    0.32
  -6 -15   3    4.25    0.89
  -6  15   3    5.40    0.92
   6  15  -3    5.08    0.96
   5 -15  -3    4.79    0.82
  -5 -15   3    6.41    0.97
  -5  15   3    3.10    0.69
   5  15  -3    3.93    0.83
  -4 -15   3    9.29    1.07
   4 -15  -3    8.05    1.00
  -4  15   3    6.96    0.91
   4  15  -3    9.48    1.12
   3 -15  -3    0.06    0.36
  -3 -15   3    0.59    0.43
   3  15  -3    0.16    0.45
  -3  15   3   -0.11    0.33
  -2 -15   3    4.06    0.71
   2 -15  -3    5.40    0.85
  -2  15   3    4.22    0.74
   2  15  -3    3.41    0.69
  -1 -15   3    3.61    0.69
   1 -15  -3    2.44    0.63
   1  15  -3    2.12    0.58
  -1  15   3    3.28    0.67
   0 -15  -3    0.43    0.47
   0 -15   3    0.80    0.40
   0  15   3    0.69    0.46
   0  15  -3    0.67    0.42
  -1 -15  -3    6.28    0.85
  -1  15  -3    6.69    0.83
   1  15   3    5.76    0.85
  -2 -15  -3   26.78    1.50
   2  15   3   25.55    1.47
  -2  15  -3   26.39    1.37
  -3 -15  -3    0.77    0.49
  -3  15  -3    1.29    0.47
   3  15   3    1.42    0.52
  -4 -15  -3    7.44    0.99
   4  15   3    6.77    0.95
  -4  15  -3    8.85    0.96
  -5 -15  -3    2.27    0.65
  -5  15  -3    0.79    0.42
  -6 -15  -3    3.11    0.74
  -6  15  -3    1.70    0.50
  -6  15  -3    2.71    0.66
  -5 -16   3    3.29    0.80
  -5  16   3    2.04    0.63
   5  16  -3    2.34    0.72
  -4 -16   3    0.23    0.46
   4 -16  -3   -0.34    0.41
   4  16  -3   -0.11    0.50
  -4  16   3    0.29    0.47
  -3 -16   3    1.91    0.61
   3 -16  -3    1.96    0.59
  -3  16   3    1.42    0.55
   3  16  -3    1.66    0.60
   2 -16  -3    2.26    0.62
  -2 -16   3    3.75    0.76
   2  16  -3    3.00    0.70
  -2  16   3    1.62    0.54
  -1 -16   3    1.51    0.49
   1 -16  -3    1.77    0.62
   1  16  -3    2.90    0.66
  -1  16   3    0.94    0.54
   0 -16  -3    3.65    0.73
   0  16  -3    3.91    0.70
   0  16   3    4.19    0.77
  -1 -16  -3   12.91    1.26
  -1  16  -3   12.01    1.14
   1  16   3   15.31    1.17
  -2 -16  -3    5.08    0.87
   2  16   3    2.76    0.68
  -2  16  -3    2.36    0.60
  -3 -16  -3    8.41    1.11
   3  16   3    5.48    0.90
  -3  16  -3    6.31    0.86
  -4 -16  -3   -0.37    0.40
   4  16   3    0.02    0.44
  -4  16  -3   -0.10    0.36
   4 -17  -3    3.46    0.76
  -4 -17   3    3.56    0.79
   4  17  -3    3.33    0.77
  -4  17   3    2.92    0.72
  -3 -17   3    4.46    0.82
   3 -17  -3    2.23    0.65
   3  17  -3    3.86    0.81
  -3  17   3    4.15    0.81
   2 -17  -3    0.60    0.56
  -2 -17   3    0.70    0.49
  -2  17   3   -0.28    0.44
   2  17  -3    0.71    0.58
   1 -17  -3    2.32    0.72
   1  17  -3    1.27    0.61
  -1  17   3    1.36    0.56
   0 -17  -3    1.70    0.67
   0  17  -3    1.55    0.54
   0  17   3    2.87    0.73
  -1 -17  -3    0.89    0.54
  -1  17  -3    0.05    0.42
   1  17   3    0.16    0.44
  -2 -17  -3   -0.07    0.40
   2  17   3   -0.51    0.35
  -2  17  -3   -0.12    0.40
  -3 -17  -3    0.10    0.50
  -3  17  -3   -0.59    0.32
   3  17   3   -0.67    0.35
   1 -18  -3    0.09    0.47
   1  18  -3    0.32    0.47
  -1  18   3   -0.01    0.44
   0 -18  -3    3.99    0.86
   0  18  -3    3.86    0.77
   0  18   3    3.75    0.79
  -1 -18  -3   -0.18    0.45
  -1  18  -3    0.03    0.44
   1  18   3   -0.29    0.38
 -11   0   4    0.51    0.42
 -10   0   4    2.30    0.59
   9   0  -4   -0.62    0.26
  -9   0   4    0.10    0.26
  -8   0   4    5.57    0.69
   8   0  -4    4.06    0.62
  -7   0   4   -0.36    0.17
   7   0  -4    0.06    0.25
  -6   0   4    2.64    0.44
   6   0  -4    2.36    0.44
   5   0  -4   -0.02    0.18
  -5   0   4   -0.03    0.17
   4   0  -4   95.80    2.01
  -4   0   4   99.05    2.02
   3   0  -4    0.29    0.17
  -3   0   4   -0.01    0.13
  -2   0   4  159.94    2.56
   2   0  -4  159.43    2.57
   2   0  -4  155.05    2.17
   1   0  -4    0.02    0.13
  -1   0   4   -0.06    0.11
   1   0  -4   -0.03    0.09
   1   0  -4   -0.03    0.12
   0   0  -4    2.67    0.30
   0   0  -4    2.71    0.19
   0   0  -4    2.69    0.26
  -1   0  -4   -0.06    0.13
  -1   0  -4    0.08    0.06
  -1   0  -4   -0.11    0.12
  -2   0  -4    8.91    0.49
  -2   0  -4    7.68    0.46
  -3   0  -4    0.04    0.15
  -3   0  -4   -0.15    0.13
  -3   0  -4    0.08    0.07
  -4   0  -4   37.19    0.77
  -4   0  -4   38.32    1.17
  -4   0  -4   37.03    1.17
  -5   0  -4    0.37    0.14
  -5   0  -4    0.23    0.21
  -5   0  -4    0.31    0.24
  -6   0  -4   21.04    0.98
  -6   0  -4   21.27    1.00
  -6   0  -4   20.88    0.70
  -7   0  -4    0.23    0.28
  -7   0  -4    0.04    0.18
  -7   0  -4    0.72    0.29
  -8   0  -4   29.90    0.99
  -8   0  -4   27.76    1.25
  -9   0  -4    0.23    0.22
 -11  -1   4    1.54    0.51
 -11   1   4    0.51    0.43
 -10  -1   4    8.46    0.95
  10   1  -4    8.91    1.03
 -10   1   4    7.55    0.90
  -9  -1   4    3.80    0.63
   9  -1  -4    4.34    0.66
  -9   1   4    4.75    0.69
   9   1  -4    3.74    0.64
   8  -1  -4    0.51    0.35
  -8  -1   4    0.11    0.27
   8   1  -4    0.24    0.33
  -8   1   4   -0.07    0.28
  -7  -1   4    1.14    0.37
   7  -1  -4    1.76    0.41
  -7   1   4    1.91    0.42
   7   1  -4    1.16    0.38
  -6  -1   4   53.17    1.59
   6  -1  -4   53.84    1.58
  -6   1   4   53.87    1.58
   6   1  -4   55.18    1.60
   5  -1  -4    6.52    0.59
  -5  -1   4    6.88    0.54
  -5   1   4    7.14    0.55
   5   1  -4    5.70    0.56
  -4  -1   4   47.51    1.28
   4  -1  -4   49.38    1.30
   4   1  -4   48.93    0.74
  -4   1   4   45.07    1.25
   4   1  -4   46.67    1.29
  -3  -1   4   66.70    1.45
   3  -1  -4   66.83    1.46
   3   1  -4   67.53    1.48
  -3   1   4   65.23    1.44
  -2  -1   4    1.56    0.23
   2  -1  -4    1.45    0.22
  -2   1   4    1.58    0.24
   2   1  -4    1.29    0.20
   2   1  -4    1.66    0.16
   2   1  -4    1.87    0.27
   1  -1  -4   25.44    0.75
   1  -1  -4   26.33    0.61
   1  -1  -4   24.96    0.68
  -1  -1   4   26.06    0.66
  -1   1   4   25.93    0.68
   1   1  -4   26.41    0.63
   1   1  -4   25.35    0.71
   1   1  -4   27.55    0.68
   0  -1  -4   11.26    0.38
   0  -1  -4   10.71    0.43
   0  -1  -4   11.23    0.50
   0   1  -4   11.62    0.50
   0   1  -4   11.26    0.45
   0   1  -4   11.32    0.34
  -1  -1  -4   91.62    1.76
  -1  -1  -4   91.32    1.40
  -1  -1  -4   89.95    1.67
  -1   1  -4   88.87    1.67
  -1   1  -4   88.01    1.75
  -2  -1  -4    5.87    0.42
  -2  -1  -4    6.13    0.42
  -2  -1  -4    6.41    0.25
  -2   1  -4    6.89    0.44
  -2   1  -4    6.60    0.43
  -3  -1  -4   24.78    0.87
  -3  -1  -4   22.73    0.55
  -3  -1  -4   23.77    0.84
  -3   1  -4   24.24    0.86
  -3   1  -4   22.44    0.85
  -4  -1  -4    0.37    0.14
  -4  -1  -4    0.63    0.25
  -4  -1  -4    0.45    0.21
  -4   1  -4    0.32    0.10
  -4   1  -4    0.39    0.22
  -4   1  -4    0.45    0.22
  -5  -1  -4   73.90    1.86
  -5  -1  -4   73.41    1.43
  -5  -1  -4   73.92    1.83
  -5   1  -4   73.40    1.84
  -5   1  -4   73.52    1.87
  -5   1  -4   73.22    1.33
  -6  -1  -4    6.06    0.65
  -6  -1  -4    6.41    0.43
  -6  -1  -4    7.36    0.61
  -6   1  -4    6.49    0.65
  -6   1  -4    6.11    0.64
  -6   1  -4    6.54    0.39
  -7  -1  -4    6.79    0.69
  -7  -1  -4    6.96    0.49
  -7   1  -4    7.36    0.76
  -7   1  -4    6.87    0.46
  -7   1  -4    6.45    0.72
  -8  -1  -4    0.71    0.26
  -8  -1  -4    0.72    0.32
  -8   1  -4    0.73    0.38
  -8   1  -4    0.44    0.23
  -9  -1  -4    7.48    0.60
  -9   1  -4    7.77    0.84
 -11  -2   4    1.02    0.50
 -11   2   4    1.16    0.47
 -10  -2   4    2.16    0.56
 -10   2   4    3.00    0.59
  10   2  -4    1.29    0.48
   9  -2  -4    4.01    0.63
  -9  -2   4    4.21    0.66
   9   2  -4    5.02    0.70
  -9   2   4    4.52    0.67
   8  -2  -4    7.04    0.78
  -8  -2   4    5.05    0.65
   8   2  -4    5.67    0.68
  -8   2   4    7.26    0.79
   7  -2  -4    2.09    0.44
  -7  -2   4    1.33    0.36
  -7   2   4    2.19    0.44
   7   2  -4    1.71    0.41
   6  -2  -4   35.20    1.24
  -6  -2   4   34.88    1.25
  -6   2   4   34.68    1.24
   6   2  -4   32.85    1.23
  -5  -2   4   14.21    0.74
   5  -2  -4   12.76    0.69
  -5   2   4   11.92    0.67
   5   2  -4   12.62    0.73
   4  -2  -4   76.36    1.72
  -4  -2   4   75.71    1.72
   4   2  -4   74.76    1.73
  -4   2   4   75.85    1.71
  -3  -2   4   14.96    0.63
   3  -2  -4   15.02    0.64
   3   2  -4   14.28    0.47
   3   2  -4   15.00    0.65
   2  -2  -4   -0.12    0.14
  -2  -2   4    0.02    0.12
   2   2  -4    0.11    0.16
   2   2  -4   -0.13    0.09
  -2   2   4   -0.06    0.13
  -1  -2   4    6.09    0.33
   1  -2  -4    5.73    0.36
   1   2  -4    5.79    0.31
   1   2  -4    7.41    0.36
  -1   2   4    5.69    0.34
   1   2  -4    6.72    0.36
   0  -2  -4   10.09    0.48
   0  -2  -4    9.03    0.38
   0   2  -4    9.59    0.34
   0   2   4    9.80    0.39
   0   2  -4    9.67    0.46
   0   2  -4    8.71    0.40
  -1  -2  -4   13.69    0.44
  -1  -2  -4   13.66    0.58
  -1   2  -4   12.81    0.57
  -1   2  -4   13.11    0.55
  -1   2  -4   13.65    0.31
  -2  -2  -4   16.20    0.49
  -2  -2  -4   16.68    0.66
  -2   2  -4   17.29    0.68
  -2   2  -4   15.57    0.67
  -3  -2  -4   74.93    1.65
  -3  -2  -4   71.96    1.33
  -3   2  -4   74.45    1.73
  -3   2  -4   73.73    1.67
  -4  -2  -4   62.31    1.25
  -4  -2  -4   60.04    1.51
  -4   2  -4   61.10    1.62
  -4   2  -4   61.81    1.02
  -4   2  -4   58.65    1.54
  -5  -2  -4    1.08    0.23
  -5  -2  -4    0.70    0.25
  -5   2  -4    0.70    0.28
  -5   2  -4    1.01    0.17
  -5   2  -4    0.93    0.29
  -6  -2  -4   25.09    1.03
  -6  -2  -4   24.03    0.83
  -6   2  -4   25.22    1.11
  -6   2  -4   24.86    0.72
  -6   2  -4   23.59    1.07
  -7  -2  -4    5.78    0.61
  -7  -2  -4    6.21    0.50
  -7   2  -4    5.62    0.66
  -7   2  -4    6.55    0.43
  -7   2  -4    7.74    0.80
  -8  -2  -4    0.35    0.24
  -8  -2  -4    0.35    0.27
  -8   2  -4    0.42    0.21
  -8   2  -4   -0.13    0.28
  -9  -2  -4    6.17    0.63
  -9   2  -4    5.57    0.74
 -11  -3   4   -0.05    0.38
 -11   3   4    0.30    0.41
 -10  -3   4   14.34    1.09
 -10   3   4   14.67    1.07
  10   3  -4   14.05    1.10
   9  -3  -4    5.45    0.72
  -9  -3   4    5.36    0.72
  -9   3   4    5.15    0.71
   9   3  -4    7.00    0.84
   8  -3  -4   -0.06    0.26
  -8  -3   4   -0.13    0.25
  -8   3   4   -0.04    0.24
   8   3  -4    0.36    0.36
   7  -3  -4   -0.08    0.26
  -7  -3   4   -0.16    0.22
   7   3  -4    0.22    0.28
  -7   3   4    0.17    0.28
   6  -3  -4    0.17    0.26
  -6  -3   4    0.18    0.24
   6   3  -4    0.53    0.29
  -6   3   4    0.30    0.25
   5  -3  -4    5.43    0.56
  -5  -3   4    6.09    0.60
  -5   3   4    5.67    0.56
   5   3  -4    6.28    0.63
  -5   3   4    5.52    0.24
  -4  -3   4   22.21    0.86
   4  -3  -4   23.14    0.87
   4   3  -4   22.49    0.87
   4   3  -4   21.75    0.55
   3  -3  -4   24.88    0.84
  -3  -3   4   23.66    0.83
   3   3  -4   23.26    0.59
   3   3  -4   23.62    0.84
  -3   3   4   24.78    0.84
   2  -3  -4   37.73    1.00
  -2  -3   4   36.93    0.97
   2   3  -4   36.71    0.98
   2   3  -4   38.27    0.83
  -2   3   4   36.81    0.99
   1  -3  -4    2.39    0.28
  -1  -3   4    2.50    0.26
  -1   3   4    2.14    0.26
   1   3  -4    2.23    0.25
   1   3  -4    2.55    0.26
   0  -3  -4   26.54    0.74
   0  -3  -4   26.89    0.83
   0   3   4   25.53    0.71
   0   3  -4   25.89    0.77
   0   3  -4   28.02    0.78
   0   3  -4   26.01    0.64
  -1  -3  -4   16.05    0.56
  -1  -3  -4   16.83    0.65
  -1   3  -4   17.76    0.45
  -1   3  -4   16.98    0.65
   1   3   4   16.60    0.54
  -1   3  -4   17.50    0.69
  -2  -3  -4   89.61    1.83
  -2  -3  -4   90.25    1.62
  -2   3  -4   91.30    1.33
  -2   3  -4   89.29    1.84
   2   3   4   90.76    1.60
  -2   3  -4   90.14    1.91
  -3  -3  -4   24.10    0.72
  -3  -3  -4   23.08    0.83
  -3   3  -4   23.20    0.92
  -3   3  -4   23.22    0.48
   3   3   4   23.78    0.70
  -3   3  -4   25.71    0.92
  -4  -3  -4   11.18    0.52
  -4  -3  -4   10.62    0.60
  -4   3  -4   10.93    0.67
  -4   3  -4   11.11    0.37
  -4   3  -4   11.39    0.66
   4   3   4   10.84    0.51
  -5  -3  -4    0.71    0.22
  -5  -3  -4    0.32    0.21
  -5   3  -4    0.00    0.21
  -5   3  -4    0.13    0.12
  -5   3  -4    0.18    0.22
  -6  -3  -4    0.47    0.22
  -6  -3  -4    0.63    0.27
  -6   3  -4    0.45    0.26
  -6   3  -4    0.51    0.17
  -6   3  -4    0.79    0.30
  -7  -3  -4    1.13    0.31
  -7  -3  -4    1.08    0.31
  -7   3  -4    0.61    0.34
  -7   3  -4    0.94    0.23
  -8  -3  -4    2.57    0.44
  -8   3  -4    2.25    0.34
  -8   3  -4    1.66    0.48
  -9  -3  -4    3.47    0.52
  -9   3  -4    4.81    0.72
 -10  -3  -4   -0.16    0.26
 -10   3  -4   -0.22    0.32
 -11  -4   4   -0.02    0.39
 -11   4   4   -0.16    0.34
 -10  -4   4    4.48    0.72
 -10   4   4    5.12    0.76
  10   4  -4    2.86    0.63
  -9  -4   4   18.05    1.14
   9  -4  -4   19.55    1.14
   9   4  -4   17.98    1.16
  -9   4   4   18.69    1.14
  -8  -4   4   -0.03    0.29
   8  -4  -4    0.01    0.28
   8   4  -4    0.37    0.36
  -8   4   4    0.02    0.25
  -7  -4   4    2.29    0.48
   7  -4  -4    3.96    0.57
   7   4  -4    3.55    0.56
  -7   4   4    3.62    0.56
  -6  -4   4    0.88    0.31
   6  -4  -4    0.34    0.29
   6   4  -4    1.09    0.36
  -6   4   4    0.76    0.30
   5  -4  -4    4.98    0.54
  -5  -4   4    3.56    0.48
  -5   4   4    4.37    0.26
   5   4  -4    4.17    0.19
   5   4  -4    3.67    0.47
   4  -4  -4   48.02    1.35
  -4  -4   4   48.42    1.36
   4   4  -4   47.97    0.83
   4   4  -4   48.66    1.37
  -4   4   4   46.20    1.34
  -3  -4   4  135.57    2.52
   3  -4  -4  139.33    2.57
  -3   4   4  138.17    2.56
   3   4  -4  136.60    2.55
   3   4  -4  138.92    2.06
  -2  -4   4    3.62    0.38
   2  -4  -4    3.04    0.35
   2   4  -4    2.79    0.33
  -2   4   4    3.50    0.37
   2   4  -4    3.37    0.25
   1  -4  -4  412.28    5.99
  -1  -4   4  419.34    5.87
   1   4  -4  409.18    5.88
  -1   4   4  417.39    5.97
   1   4  -4  425.21    5.85
   0  -4  -4    1.39    0.24
   0  -4   4    1.14    0.19
   0   4  -4    1.37    0.21
   0   4  -4    0.84    0.19
   0   4   4    1.14    0.22
  -1  -4  -4    0.37    0.18
  -1  -4  -4    0.37    0.17
  -1   4  -4    0.40    0.13
   1   4   4    0.25    0.15
  -1   4  -4    0.42    0.18
  -1   4  -4    0.13    0.16
  -2  -4  -4    1.74    0.27
  -2  -4  -4    1.25    0.25
  -2   4  -4    1.43    0.29
  -2   4  -4    1.06    0.25
   2   4   4    1.95    0.26
  -2   4  -4    1.70    0.19
  -3  -4  -4   13.25    0.58
  -3  -4  -4   12.33    0.61
   3   4   4   11.96    0.55
  -3   4  -4   12.32    0.40
  -3   4  -4   13.01    0.70
  -3   4  -4   13.80    0.70
  -4  -4  -4   87.88    1.79
  -4  -4  -4   87.29    1.89
  -4   4  -4   86.88    1.47
   4   4   4   86.66    1.77
  -4   4  -4   83.38    2.07
  -4   4  -4   88.76    2.03
  -5  -4  -4    2.60    0.39
  -5  -4  -4    2.93    0.40
  -5   4  -4    2.99    0.49
  -5   4  -4    2.65    0.27
  -5   4  -4    2.05    0.41
  -6  -4  -4   16.37    0.81
  -6  -4  -4   17.54    0.79
  -6   4  -4   17.03    0.92
  -6   4  -4   15.90    0.93
  -6   4  -4   17.66    0.63
  -7  -4  -4    0.58    0.27
  -7  -4  -4    0.73    0.28
  -7   4  -4    0.77    0.35
  -7   4  -4    0.55    0.20
  -8  -4  -4    0.01    0.25
  -8   4  -4    0.21    0.33
  -9  -4  -4   18.45    0.98
  -9   4  -4   19.90    1.20
 -10  -4  -4    1.21    0.41
 -10   4  -4    1.30    0.50
 -11  -5   4    6.46    0.93
 -11   5   4    7.94    1.03
 -10  -5   4    0.68    0.42
  10   5  -4    0.93    0.49
 -10   5   4    0.63    0.40
  -9  -5   4    4.20    0.72
   9  -5  -4    2.91    0.59
  -9   5   4    3.44    0.61
   9   5  -4    3.73    0.68
   8  -5  -4    7.46    0.83
  -8  -5   4    7.63    0.85
   8   5  -4    7.50    0.83
  -8   5   4    6.94    0.80
  -7  -5   4   19.73    1.05
   7  -5  -4   22.84    1.11
   7   5  -4   20.08    1.08
  -7   5   4   21.55    1.08
  -6  -5   4    3.27    0.52
   6  -5  -4    3.07    0.49
   6   5  -4    3.76    0.56
  -6   5   4    2.23    0.42
  -6   5   4    2.99    0.33
  -5  -5   4    5.95    0.61
   5  -5  -4    7.52    0.69
   5   5  -4    6.31    0.62
  -5   5   4    6.12    0.64
   4  -5  -4   37.72    1.22
  -4  -5   4   36.77    1.21
  -4   5   4   36.00    1.20
   4   5  -4   37.26    1.22
   3  -5  -4   68.03    1.65
  -3  -5   4   72.28    1.68
  -3   5   4   71.27    1.68
   3   5  -4   70.17    1.17
   3   5  -4   71.07    1.69
  -2  -5   4  112.05    2.15
   2  -5  -4  113.81    2.23
  -2   5   4  113.49    2.21
   2   5  -4  114.80    1.86
   2   5  -4  112.02    2.18
   1  -5  -4    0.85    0.25
  -1  -5   4    1.00    0.23
  -1   5   4    1.22    0.26
   1   5  -4    0.66    0.17
   1   5  -4    1.48    0.27
   0  -5   4    0.27    0.14
   0  -5  -4    0.12    0.17
   0   5  -4    0.26    0.16
   0   5  -4    0.12    0.16
   0   5   4    0.15    0.17
  -1  -5  -4  169.89    2.95
   1  -5   4  168.98    2.66
  -1  -5  -4  171.82    2.88
  -1   5  -4  172.47    2.98
  -1   5  -4  170.52    2.67
   1   5   4  168.38    2.85
  -2  -5  -4   18.16    0.72
  -2  -5  -4   17.37    0.71
  -2   5  -4   17.63    0.56
   2   5   4   18.19    0.69
  -2   5  -4   18.07    0.78
  -2   5  -4   16.97    0.76
  -3  -5  -4    2.27    0.34
  -3  -5  -4    1.81    0.30
  -3   5  -4    1.48    0.32
   3   5   4    2.00    0.31
  -3   5  -4    1.98    0.23
  -3   5  -4    2.31    0.38
  -4  -5  -4   18.75    0.78
  -4  -5  -4   17.29    0.75
  -4   5  -4   16.63    0.84
  -4   5  -4   18.10    0.58
   4   5   4   18.32    0.76
  -4   5  -4   15.30    0.83
  -5  -5  -4   10.97    0.63
  -5  -5  -4   10.27    0.64
  -5   5  -4   11.55    0.49
  -5   5  -4    9.75    0.75
  -5   5  -4    9.36    0.70
  -6  -5  -4    4.52    0.52
  -6  -5  -4    5.07    0.53
  -6   5  -4    6.23    0.72
  -6   5  -4    5.37    0.40
  -7  -5  -4   19.19    0.93
  -7   5  -4   19.95    1.09
  -7   5  -4   21.39    0.77
  -8  -5  -4    0.22    0.25
  -8   5  -4    0.25    0.33
  -9  -5  -4    2.30    0.50
  -9   5  -4    1.73    0.51
 -10  -5  -4    0.50    0.35
 -11  -6   4   11.29    1.22
 -11   6   4   13.96    1.13
 -10  -6   4    0.34    0.39
 -10   6   4    0.31    0.33
  10   6  -4    0.47    0.41
  -9  -6   4   42.64    1.78
  -9   6   4   40.05    1.70
   9   6  -4   44.10    1.82
   8  -6  -4    1.21    0.41
  -8  -6   4    1.01    0.42
   8   6  -4    0.92    0.42
  -8   6   4    0.59    0.34
   7  -6  -4   19.20    1.04
  -7  -6   4   18.47    1.05
   7   6  -4   17.02    1.02
  -7   6   4   17.89    1.01
   6  -6  -4    2.17    0.46
  -6  -6   4    3.13    0.52
  -6   6   4    2.37    0.47
   6   6  -4    1.91    0.46
  -6   6   4    1.45    0.28
   5  -6  -4   15.59    0.86
  -5  -6   4   15.39    0.86
  -5   6   4   16.14    0.88
   5   6  -4   16.80    0.91
   4  -6  -4   20.24    0.92
  -4  -6   4   21.17    0.95
   4   6  -4   20.30    0.95
  -4   6   4   21.44    0.95
   3  -6  -4   17.20    0.80
  -3  -6   4   18.38    0.82
   3   6  -4   18.60    0.85
  -3   6   4   18.11    0.81
   2  -6  -4   55.87    1.50
  -2  -6   4   55.80    1.43
   2   6  -4   58.83    1.15
  -2   6   4   57.42    1.49
   2   6  -4   61.24    1.50
   1  -6  -4    9.93    0.57
  -1  -6   4   10.06    0.54
   1   6  -4   10.04    0.46
   1   6  -4    9.54    0.55
  -1   6   4    8.40    0.54
   0  -6   4    4.33    0.35
   0  -6  -4    3.36    0.41
   0   6   4    4.83    0.47
   0   6  -4    3.31    0.36
   0   6  -4    3.00    0.35
   1  -6   4   36.04    0.95
  -1  -6  -4   33.88    1.06
  -1   6  -4   37.26    0.97
  -1   6  -4   35.50    1.08
   1   6   4   35.69    1.06
  -2  -6  -4    3.26    0.42
   2  -6   4    3.08    0.32
  -2  -6  -4    3.04    0.38
   2   6   4    3.06    0.39
  -2   6  -4    2.93    0.42
  -2   6  -4    3.25    0.32
  -3  -6  -4    2.24    0.37
  -3  -6  -4    2.66    0.37
  -3   6  -4    1.49    0.32
  -3   6  -4    2.10    0.27
  -3   6  -4    1.73    0.36
   3   6   4    2.23    0.36
  -4  -6  -4    0.31    0.24
  -4  -6  -4    0.17    0.20
  -4   6  -4    0.37    0.25
  -4   6  -4    0.23    0.15
  -4   6  -4    0.33    0.26
   4   6   4    0.64    0.26
  -5  -6  -4   35.00    1.20
  -5  -6  -4   35.75    1.14
  -5   6  -4   37.76    1.37
  -6  -6  -4    2.73    0.47
  -6  -6  -4    3.00    0.47
  -6   6  -4    2.80    0.34
  -6   6  -4    3.08    0.51
  -7  -6  -4   10.08    0.74
  -7   6  -4   12.11    0.89
  -7   6  -4   11.06    0.60
  -8  -6  -4    2.65    0.51
  -8   6  -4    2.75    0.57
  -9  -6  -4    1.68    0.46
  -9   6  -4    2.08    0.57
 -10  -6  -4   -0.10    0.33
 -11  -7   4    0.12    0.47
 -11   7   4    0.16    0.43
 -10  -7   4    5.77    0.84
  10   7  -4    4.37    0.81
 -10   7   4    5.16    0.79
  -9  -7   4    0.04    0.32
   9   7  -4    0.59    0.45
  -9   7   4    0.31    0.33
   8  -7  -4    0.08    0.33
  -8  -7   4    0.72    0.37
  -8   7   4    0.24    0.34
   8   7  -4    0.57    0.42
  -7  -7   4    2.81    0.55
   7  -7  -4    2.57    0.52
   7   7  -4    2.60    0.52
   6  -7  -4    9.71    0.75
  -6  -7   4   10.08    0.80
  -6   7   4    9.84    0.75
   6   7  -4   11.55    0.88
  -5  -7   4    4.12    0.56
   5  -7  -4    4.43    0.58
   5   7  -4    4.21    0.58
  -5   7   4    4.32    0.57
  -4  -7   4    0.06    0.22
   4  -7  -4    0.23    0.25
  -4   7   4   -0.15    0.20
   4   7  -4    0.26    0.26
  -3  -7   4    7.82    0.58
   3  -7  -4    9.34    0.64
   3   7  -4    8.17    0.62
  -3   7   4    9.10    0.63
   2  -7  -4   36.76    1.22
  -2  -7   4   38.41    1.19
  -2   7   4   37.88    1.22
   2   7  -4   39.98    1.22
   1  -7  -4   10.89    0.64
  -1  -7   4    9.74    0.57
   1   7  -4   11.11    0.63
  -1   7   4   10.52    0.62
   0  -7  -4   11.71    0.66
   0  -7   4   12.91    0.63
   0   7  -4   12.26    0.60
   0   7   4   12.73    0.66
   0   7  -4   10.87    0.60
  -1  -7  -4   35.07    1.14
   1  -7   4   34.35    1.00
   1   7   4   34.78    1.12
  -1   7  -4   34.59    1.11
  -1   7  -4   36.77    1.03
   2  -7   4   32.32    0.93
  -2  -7  -4   30.55    1.01
  -2  -7  -4   31.65    1.09
   2   7   4   29.89    1.06
  -2   7  -4   32.32    1.14
  -2   7  -4   31.28    0.94
  -3  -7  -4   13.46    0.68
  -3  -7  -4   12.93    0.73
   3   7   4   13.25    0.72
  -3   7  -4   14.84    0.81
  -3   7  -4   12.70    0.58
  -4  -7  -4    0.87    0.27
  -4  -7  -4    1.48    0.36
  -4   7  -4    1.52    0.35
  -4   7  -4    0.96    0.24
   4   7   4    1.21    0.33
  -5  -7  -4    0.16    0.19
  -5  -7  -4    0.44    0.29
  -5   7  -4    0.10    0.19
  -5   7  -4    0.28    0.29
  -6  -7  -4   24.87    1.10
  -6   7  -4   25.53    0.89
  -6   7  -4   24.36    1.19
  -7  -7  -4    1.03    0.37
  -7   7  -4    0.98    0.40
  -7   7  -4    0.89    0.27
  -8  -7  -4    0.43    0.34
  -8   7  -4    0.20    0.33
  -9  -7  -4    0.86    0.42
  -9   7  -4    1.11    0.49
 -10  -8   4    0.94    0.49
 -10   8   4    0.51    0.41
  10   8  -4    0.63    0.51
  -9  -8   4    7.14    0.95
   9   8  -4    7.12    0.96
  -9   8   4    6.35    0.87
  -8  -8   4    1.79    0.49
   8  -8  -4    2.75    0.61
   8   8  -4    1.55    0.53
  -8   8   4    2.23    0.52
   7  -8  -4   -0.15    0.30
  -7  -8   4   -0.41    0.27
   7   8  -4   -0.30    0.32
  -7   8   4   -0.04    0.30
   6  -8  -4    0.19    0.29
  -6  -8   4    0.15    0.30
  -6   8   4    0.24    0.28
   6   8  -4   -0.24    0.31
   5  -8  -4    7.85    0.76
  -5  -8   4    8.26    0.79
  -5   8   4    8.51    0.70
   5   8  -4    8.77    0.83
   4  -8  -4    0.15    0.28
  -4  -8   4    0.12    0.23
  -4   8   4   -0.03    0.26
   4   8  -4   -0.20    0.26
  -3  -8   4   -0.03    0.20
   3  -8  -4    0.61    0.28
   3   8  -4    0.32    0.29
  -3   8   4    0.08    0.23
  -2  -8   4   79.89    1.93
   2  -8  -4   82.71    2.04
   2   8  -4   80.06    1.97
  -2   8   4   82.82    2.00
   1  -8  -4    5.53    0.60
  -1  -8   4    5.27    0.53
   1   8  -4    5.15    0.56
  -1   8   4    5.58    0.59
   0  -8   4    3.42    0.43
   0  -8  -4    3.71    0.51
   0   8  -4    3.33    0.43
   0   8   4    3.85    0.49
   1  -8   4    0.04    0.20
  -1  -8  -4    0.03    0.23
   1   8   4    0.08    0.22
  -1   8  -4    0.51    0.23
  -2  -8  -4    0.08    0.22
  -2  -8  -4    0.48    0.22
   2  -8   4    0.48    0.21
   2   8   4    0.32    0.24
  -2   8  -4   -0.01    0.20
  -3  -8  -4    0.25    0.25
  -3  -8  -4    0.24    0.19
  -3   8  -4    0.04    0.20
  -3   8  -4    0.37    0.22
   3   8   4    0.00    0.23
  -4  -8  -4    0.54    0.29
  -4  -8  -4    0.34    0.22
   4   8   4    0.69    0.31
  -4   8  -4    0.76    0.24
  -4   8  -4    0.94    0.33
  -5  -8  -4   24.07    1.10
  -5   8  -4   26.86    0.94
  -5   8  -4   27.05    1.23
  -6  -8  -4    2.50    0.50
  -6   8  -4    1.73    0.48
  -7  -8  -4   11.48    0.88
  -7   8  -4   12.74    0.70
  -7   8  -4   10.74    1.00
  -8  -8  -4   14.85    1.01
  -8   8  -4   16.34    1.13
  -9  -8  -4   20.41    1.21
  -9   8  -4   21.00    1.30
 -10  -9   4    0.39    0.43
 -10   9   4    0.12    0.38
  10   9  -4    0.42    0.47
  -9  -9   4    0.10    0.39
   9   9  -4   -0.20    0.38
  -9   9   4    0.10    0.35
  -8  -9   4    0.18    0.39
   8  -9  -4    0.38    0.40
   8   9  -4    0.36    0.47
  -8   9   4    0.85    0.40
   7  -9  -4    2.71    0.58
  -7  -9   4    2.08    0.52
   7   9  -4    1.58    0.54
  -7   9   4    1.88    0.50
  -6  -9   4    1.67    0.46
   6  -9  -4    1.91    0.51
   6   9  -4    1.84    0.50
  -6   9   4    1.58    0.47
  -5  -9   4    0.67    0.36
   5  -9  -4    0.59    0.37
  -5   9   4    0.97    0.38
   5   9  -4    0.91    0.42
   4  -9  -4    5.23    0.66
  -4  -9   4    4.95    0.64
  -4   9   4    4.49    0.61
   4   9  -4    5.19    0.66
   3  -9  -4   19.90    1.03
  -3  -9   4   19.40    0.97
  -3   9   4   21.63    1.05
   3   9  -4   21.53    1.05
   2  -9  -4   -0.02    0.26
  -2  -9   4    0.25    0.26
  -2   9   4    0.14    0.27
   2   9  -4    0.09    0.28
   1  -9  -4   17.14    0.93
  -1  -9   4   17.52    0.86
   1   9  -4   15.56    0.85
  -1   9   4   17.60    0.89
   0  -9   4    6.28    0.60
   0  -9  -4    5.33    0.59
   0   9  -4    5.63    0.57
   0   9   4    5.95    0.64
   1  -9   4    2.56    0.40
  -1  -9  -4    2.53    0.47
   1   9   4    1.98    0.41
  -1   9  -4    2.43    0.40
  -2  -9  -4    7.42    0.56
  -2  -9  -4    8.99    0.67
   2   9   4    8.35    0.67
  -2   9  -4    8.19    0.57
  -3  -9  -4    4.19    0.48
  -3  -9  -4    4.24    0.57
  -3   9  -4    4.87    0.51
   3   9   4    4.79    0.59
  -4  -9  -4    2.45    0.47
  -4  -9  -4    2.20    0.39
  -4   9  -4    2.58    0.51
   4   9   4    2.49    0.47
  -4   9  -4    2.16    0.36
  -5  -9  -4   12.06    0.84
  -5   9  -4   12.65    0.90
  -5   9  -4   12.55    0.69
  -6  -9  -4    9.98    0.92
  -6   9  -4   10.98    0.67
  -6   9  -4    9.73    0.95
  -7  -9  -4   14.61    1.01
  -7   9  -4   15.43    1.08
  -7   9  -4   13.64    0.75
  -8  -9  -4    2.83    0.61
  -8   9  -4    3.75    0.69
  -9  -9  -4    2.91    0.65
  -9   9  -4    2.95    0.67
  -9 -10   4    1.31    0.52
  -9  10   4    1.43    0.50
   9  10  -4    0.61    0.49
  -8 -10   4    0.10    0.34
   8  10  -4    0.02    0.39
   7 -10  -4    5.19    0.75
  -7 -10   4    7.98    0.96
   7  10  -4    7.76    0.97
  -7  10   4    5.96    0.81
  -6 -10   4    2.70    0.57
   6 -10  -4    4.00    0.70
   6  10  -4    2.93    0.61
  -6  10   4    2.60    0.56
  -5 -10   4    6.25    0.77
   5 -10  -4    5.73    0.71
  -5  10   4    4.24    0.64
   5  10  -4    4.42    0.68
   4 -10  -4    6.40    0.73
  -4 -10   4    6.42    0.78
  -4  10   4    5.34    0.66
   4  10  -4    5.44    0.74
   3 -10  -4   34.96    1.41
  -3 -10   4   37.31    1.40
  -3  10   4   34.53    1.38
   3  10  -4   37.42    1.46
  -2 -10   4   76.73    2.03
   2 -10  -4   77.32    2.12
   2  10  -4   76.42    2.09
  -2  10   4   78.08    2.09
   1 -10  -4    7.18    0.72
  -1 -10   4    7.39    0.70
   1  10  -4    6.44    0.68
  -1  10   4    8.88    0.70
   0 -10  -4    0.39    0.34
   0 -10   4    0.36    0.27
   0  10   4   -0.16    0.24
   0  10  -4   -0.24    0.25
  -1 -10  -4   20.92    1.03
   1 -10   4   20.84    0.95
   1  10   4   22.09    1.04
  -1  10  -4   22.22    0.99
  -2 -10  -4    5.09    0.55
  -2 -10  -4    7.64    0.78
  -2  10  -4    7.08    0.66
   2  10   4    7.61    0.77
  -3 -10  -4   16.43    0.97
  -3 -10  -4   14.94    0.77
   3  10   4   15.59    0.93
  -3  10  -4   16.76    0.83
  -4 -10  -4   11.37    0.85
   4  10   4   12.87    0.87
  -4  10  -4   13.66    0.92
  -4  10  -4   12.80    0.75
  -5 -10  -4    0.10    0.32
  -5  10  -4    0.44    0.33
  -5  10  -4   -0.13    0.21
  -6 -10  -4    0.75    0.43
  -6  10  -4    1.52    0.50
  -6  10  -4    1.30    0.35
  -7 -10  -4    5.24    0.75
  -7  10  -4    5.25    0.78
  -7  10  -4    4.01    0.52
  -8 -10  -4    3.17    0.63
  -8  10  -4    3.59    0.69
  -9 -11   4   -0.03    0.44
  -9  11   4   -0.65    0.30
   9  11  -4    1.11    0.63
  -8 -11   4    5.11    0.81
  -8  11   4    4.96    0.80
   8  11  -4    4.47    0.82
  -7 -11   4    5.68    0.85
   7 -11  -4    6.44    0.85
   7  11  -4    5.64    0.92
  -7  11   4    5.05    0.77
   6 -11  -4   10.91    1.03
  -6 -11   4   11.65    1.14
   6  11  -4   10.51    1.09
  -6  11   4   13.27    1.03
  -5 -11   4    0.43    0.40
   5 -11  -4    0.08    0.31
   5  11  -4    0.16    0.39
  -5  11   4    0.17    0.30
  -4 -11   4   11.18    0.88
   4 -11  -4   11.24    0.91
  -4  11   4   11.52    1.04
   4  11  -4   11.69    0.96
  -3 -11   4   -0.17    0.23
   3 -11  -4    0.10    0.30
  -3  11   4    0.47    0.32
   3  11  -4    0.16    0.32
  -2 -11   4    1.34    0.41
   2 -11  -4    0.30    0.35
   2  11  -4    1.06    0.42
  -2  11   4    0.91    0.36
  -1 -11   4    2.71    0.50
   1 -11  -4    3.37    0.59
  -1  11   4    1.75    0.46
   1  11  -4    1.96    0.46
   0 -11   4    1.95    0.41
   0 -11  -4    1.45    0.42
   0  11   4    1.50    0.43
   0  11  -4    1.72    0.42
  -1 -11  -4   74.15    2.12
   1 -11   4   72.71    2.11
  -1  11  -4   71.80    1.94
   1  11   4   74.82    2.12
  -2 -11  -4   25.34    1.06
  -2 -11  -4   24.44    1.18
   2  11   4   24.69    1.17
  -2  11  -4   25.26    1.09
  -3 -11  -4    4.62    0.54
  -3 -11  -4    3.98    0.63
  -3  11  -4    4.41    0.57
   3  11   4    4.18    0.65
  -4 -11  -4   28.28    1.33
  -4  11  -4   26.56    1.31
  -4  11  -4   25.22    1.09
   4  11   4   29.68    1.35
  -5 -11  -4   30.31    1.40
  -5  11  -4   31.47    1.44
  -5  11  -4   26.99    1.12
  -6 -11  -4    0.86    0.44
  -6  11  -4    0.06    0.34
  -6  11  -4    0.09    0.26
  -7 -11  -4    4.39    0.75
  -7  11  -4    3.21    0.67
  -8 -11  -4    0.01    0.37
  -8  11  -4    0.20    0.43
  -8 -12   4    4.72    0.82
   8  12  -4    5.00    0.87
  -8  12   4    5.30    0.84
   7 -12  -4    0.05    0.39
  -7 -12   4    0.10    0.39
   7  12  -4    0.59    0.52
  -7  12   4    0.03    0.35
  -6 -12   4   27.91    1.48
   6 -12  -4   28.53    1.47
   6  12  -4   27.64    1.56
  -6  12   4   24.69    1.39
  -5 -12   4   16.15    1.12
   5 -12  -4   18.86    1.17
  -5  12   4   18.14    1.17
   5  12  -4   17.32    1.22
   4 -12  -4    1.94    0.51
  -4 -12   4    1.25    0.45
  -4  12   4    1.91    0.49
   4  12  -4    1.43    0.53
  -3 -12   4    3.47    0.58
   3 -12  -4    4.21    0.68
  -3  12   4    1.82    0.47
   3  12  -4    3.32    0.59
  -2 -12   4    0.31    0.32
   2 -12  -4   -0.01    0.35
   2  12  -4    0.62    0.35
  -2  12   4    0.60    0.39
   1 -12  -4   13.11    0.93
  -1 -12   4   14.30    0.92
   1  12  -4   14.37    0.95
  -1  12   4   13.03    0.92
   0 -12  -4    4.05    0.67
   0 -12   4    4.10    0.60
   0  12   4    4.80    0.68
   0  12  -4    4.06    0.62
  -1 -12  -4   33.60    1.46
  -1  12  -4   32.35    1.33
   1  12   4   33.20    1.44
  -2 -12  -4    1.35    0.46
   2  12   4    0.59    0.39
  -2  12  -4    1.55    0.41
  -3 -12  -4    0.94    0.42
  -3  12  -4    0.95    0.36
   3  12   4    0.91    0.39
  -4 -12  -4    6.56    0.82
  -4  12  -4    6.41    0.71
   4  12   4    7.23    0.86
  -5 -12  -4    0.79    0.43
  -5  12  -4    0.79    0.33
  -5  12  -4    0.45    0.37
  -6 -12  -4    5.53    0.82
  -6  12  -4    3.92    0.66
  -6  12  -4    3.98    0.56
  -7 -12  -4    0.41    0.45
  -7  12  -4    0.45    0.31
  -7  12  -4    0.21    0.41
  -8 -13   4    1.79    0.66
   8  13  -4    2.10    0.75
  -8  13   4    2.95    0.73
  -7 -13   4   10.05    1.16
   7  13  -4    9.57    1.19
  -7  13   4    7.43    0.97
   6 -13  -4   19.07    1.29
  -6 -13   4   19.80    1.32
  -6  13   4   19.71    1.32
   6  13  -4   22.57    1.46
  -5 -13   4    2.03    0.60
   5 -13  -4    0.77    0.45
   5  13  -4    2.91    0.70
  -5  13   4    1.28    0.48
  -4 -13   4   11.39    1.11
   4 -13  -4   13.96    1.08
   4  13  -4   10.61    1.08
  -4  13   4   13.88    1.07
  -3 -13   4    2.17    0.55
   3 -13  -4    1.48    0.53
  -3  13   4    1.77    0.54
   3  13  -4    1.47    0.52
   2 -13  -4    2.53    0.60
  -2 -13   4    2.75    0.57
   2  13  -4    3.20    0.61
  -2  13   4    2.88    0.60
  -1 -13   4    5.44    0.69
   1 -13  -4    5.74    0.79
   1  13  -4    5.05    0.67
  -1  13   4    5.64    0.74
   0 -13  -4    1.53    0.51
   0 -13   4    3.55    0.60
   0  13   4    1.87    0.50
   0  13  -4    3.05    0.58
  -1 -13  -4   29.51    1.41
   1  13   4   26.26    1.35
  -1  13  -4   24.70    1.22
  -2 -13  -4    0.52    0.41
  -2  13  -4    0.97    0.40
   2  13   4    0.97    0.44
  -3 -13  -4    0.67    0.37
  -3  13  -4    0.28    0.34
   3  13   4    0.51    0.41
  -4 -13  -4    8.32    0.91
  -4  13  -4   10.61    0.84
   4  13   4    7.95    0.90
  -5 -13  -4    1.27    0.49
  -5  13  -4    0.66    0.40
  -5  13  -4    1.78    0.44
  -6 -13  -4    0.48    0.42
  -6  13  -4    0.29    0.38
  -6  13  -4    0.21    0.32
  -7 -13  -4    2.05    0.63
  -7  13  -4    0.78    0.38
  -7  13  -4    0.92    0.50
   7  14  -4   32.70    1.82
  -7  14   4   35.64    1.83
  -6 -14   4    0.72    0.46
   6 -14  -4    0.41    0.48
  -6  14   4    0.78    0.47
   6  14  -4    0.17    0.50
   5 -14  -4   23.83    1.40
  -5 -14   4   24.60    1.46
  -5  14   4   23.09    1.39
   5  14  -4   24.06    1.47
  -4 -14   4   -0.03    0.37
   4 -14  -4    0.49    0.43
  -4  14   4    0.19    0.37
   4  14  -4    0.53    0.47
  -3 -14   4    1.01    0.47
   3 -14  -4    0.70    0.45
   3  14  -4    0.95    0.52
  -3  14   4    0.55    0.43
  -2 -14   4    0.01    0.32
   2 -14  -4    0.47    0.43
  -2  14   4    0.51    0.38
   2  14  -4    0.97    0.43
   1 -14  -4    8.48    0.97
  -1 -14   4    8.45    0.89
  -1  14   4    6.59    0.84
   1  14  -4    7.15    0.83
   0 -14  -4    3.61    0.73
   0  14   4    2.89    0.64
   0  14  -4    3.01    0.59
  -1 -14  -4    4.56    0.72
  -1  14  -4    4.84    0.69
   1  14   4    4.14    0.68
  -2 -14  -4    5.77    0.81
  -2  14  -4    4.51    0.67
   2  14   4    5.85    0.84
  -3 -14  -4    3.71    0.72
  -3  14  -4    3.69    0.62
   3  14   4    3.45    0.69
  -4 -14  -4    5.03    0.81
  -4  14  -4    4.31    0.65
   4  14   4    6.28    0.90
  -5 -14  -4    0.60    0.45
  -5  14  -4    0.00    0.29
  -5  14  -4    0.27    0.38
  -6 -14  -4   -0.50    0.39
  -6  14  -4    0.11    0.30
  -6  14  -4   -0.12    0.37
   6 -15  -4    9.40    1.16
  -6 -15   4    7.81    1.06
   6  15  -4    6.91    1.06
  -6  15   4    8.25    1.10
  -5 -15   4    0.52    0.47
   5 -15  -4   -0.69    0.39
  -5  15   4    0.11    0.44
   5  15  -4    0.92    0.60
  -4 -15   4   -0.09    0.35
   4 -15  -4    0.18    0.40
   4  15  -4   -0.04    0.45
  -4  15   4    0.18    0.39
   3 -15  -4    2.90    0.71
  -3 -15   4    3.61    0.71
  -3  15   4    2.99    0.71
   3  15  -4    2.95    0.73
   2 -15  -4    1.95    0.62
  -2 -15   4    2.61    0.63
  -2  15   4    2.00    0.61
   2  15  -4    1.58    0.57
  -1 -15   4    0.81    0.47
   1 -15  -4    0.07    0.41
   1  15  -4    0.24    0.41
  -1  15   4    0.22    0.40
   0 -15  -4    9.44    1.06
   0  15  -4    7.29    0.85
   0  15   4    8.03    1.00
  -1 -15  -4   15.22    1.19
   1  15   4   14.95    1.16
  -1  15  -4   13.22    1.03
  -2 -15  -4    6.79    0.91
   2  15   4    6.19    0.86
  -2  15  -4    7.26    0.84
  -3 -15  -4   34.32    1.72
   3  15   4   37.03    1.76
  -3  15  -4   34.46    1.53
  -4 -15  -4    1.79    0.61
  -4  15  -4    1.67    0.49
  -5 -15  -4   -0.36    0.40
  -5  15  -4    0.05    0.32
  -5  15  -4    0.90    0.48
   5 -16  -4   16.30    1.51
  -5 -16   4   16.64    1.53
   5  16  -4   15.07    1.52
  -5  16   4   17.43    1.38
   4 -16  -4    1.04    0.52
  -4 -16   4    0.72    0.52
  -4  16   4    0.86    0.52
   4  16  -4    0.96    0.61
   3 -16  -4    3.65    0.78
  -3 -16   4    4.12    0.77
   3  16  -4    2.75    0.69
  -3  16   4    3.27    0.77
   2 -16  -4    1.28    0.57
  -2 -16   4    1.13    0.46
  -2  16   4    1.45    0.55
   2  16  -4    0.79    0.50
   1 -16  -4   -0.03    0.43
   1  16  -4    0.45    0.43
  -1  16   4    0.12    0.39
   0 -16  -4   22.47    1.47
   0  16  -4   20.18    1.30
   0  16   4   20.33    1.37
  -1 -16  -4   12.40    1.25
   1  16   4   10.83    1.17
  -1  16  -4   11.37    1.10
  -2 -16  -4    3.41    0.72
   2  16   4    3.00    0.67
  -2  16  -4    4.27    0.73
  -3 -16  -4    2.36    0.66
   3  16   4    2.07    0.59
  -3  16  -4    2.83    0.62
  -4 -16  -4    3.83    0.78
  -4  16  -4    3.75    0.70
  -4 -17   4    0.36    0.49
   4 -17  -4    1.22    0.64
   4  17  -4    0.74    0.62
  -4  17   4    1.54    0.63
  -3 -17   4    1.53    0.61
   3 -17  -4    2.38    0.75
   3  17  -4    1.76    0.65
  -3  17   4    1.26    0.62
   2 -17  -4   10.57    1.23
  -2  17   4   10.21    1.19
   2  17  -4    8.74    1.05
   1 -17  -4    1.38    0.62
   1  17  -4    2.85    0.76
  -1  17   4    2.44    0.70
   0 -17  -4   14.66    1.44
   0  17  -4   16.05    1.25
   0  17   4   17.05    1.34
  -1 -17  -4    9.66    1.22
   1  17   4    6.23    1.00
  -1  17  -4    6.68    0.96
  -2 -17  -4    2.48    0.69
   2  17   4    2.04    0.60
  -2  17  -4    2.70    0.67
 -11   0   5    1.58    0.59
 -10   0   5    0.17    0.30
  10   0  -5   -0.02    0.34
   9   0  -5    1.22    0.46
  -9   0   5    0.55    0.38
  -8   0   5    0.31    0.31
   8   0  -5    0.26    0.32
  -7   0   5   20.72    1.04
   7   0  -5   19.00    1.01
  -6   0   5    0.03    0.23
   6   0  -5    0.13    0.24
   5   0  -5    4.66    0.52
  -5   0   5    4.75    0.53
   4   0  -5    0.03    0.19
  -4   0   5    0.10    0.17
   3   0  -5    0.21    0.19
  -3   0   5    0.16    0.15
  -2   0   5    0.15    0.13
   2   0  -5    0.18    0.16
   2   0  -5    0.18    0.09
   2   0  -5    0.09    0.14
   1   0  -5  212.16    3.09
  -1   0   5  213.07    3.17
   1   0  -5  208.09    3.36
   1   0  -5  214.35    3.18
   0   0  -5   -0.16    0.11
   0   0  -5    0.02    0.10
   0   0  -5   -0.12    0.12
  -1   0  -5   64.15    1.01
  -1   0  -5   62.57    1.39
  -1   0  -5   63.93    1.49
  -2   0  -5    0.10    0.17
  -2   0  -5    0.06    0.15
  -3   0  -5    2.86    0.42
  -3   0  -5    2.80    0.40
  -4   0  -5    0.01    0.09
  -4   0  -5   -0.05    0.19
  -4   0  -5    0.02    0.08
  -4   0  -5   -0.23    0.17
  -5   0  -5    2.31    0.45
  -5   0  -5    2.64    0.23
  -5   0  -5    2.91    0.46
  -6   0  -5    0.04    0.24
  -6   0  -5   -0.09    0.20
  -6   0  -5    0.00    0.12
  -7   0  -5   43.32    1.60
  -7   0  -5   43.98    1.07
  -7   0  -5   43.54    1.57
  -8   0  -5    0.09    0.25
 -11  -1   5   -0.29    0.36
 -11   1   5    0.14    0.36
  10  -1  -5    0.81    0.44
 -10  -1   5    0.68    0.45
  10   1  -5   -0.30    0.33
 -10   1   5    0.27    0.36
  -9  -1   5    0.68    0.36
   9  -1  -5    0.88    0.42
   9   1  -5    0.53    0.42
  -9   1   5    0.31    0.37
   8  -1  -5    5.05    0.70
  -8  -1   5    3.85    0.61
   8   1  -5    3.95    0.62
  -8   1   5    5.12    0.69
  -7  -1   5    1.68    0.41
   7  -1  -5    2.31    0.48
  -7   1   5    1.52    0.40
   7   1  -5    1.93    0.43
   6  -1  -5   30.07    1.19
  -6  -1   5   31.13    1.21
  -6   1   5   29.79    1.18
   6   1  -5   34.70    1.25
  -5  -1   5   10.47    0.65
   5  -1  -5   10.43    0.66
  -5   1   5    9.89    0.63
   5   1  -5    9.94    0.67
  -4  -1   5    5.50    0.45
   4  -1  -5    6.49    0.50
  -4   1   5    5.85    0.46
   4   1  -5    5.15    0.51
   3  -1  -5    2.61    0.35
  -3  -1   5    1.86    0.28
   3   1  -5    2.36    0.16
   3   1  -5    2.62    0.29
   3   1  -5    2.32    0.33
  -3   1   5    2.67    0.35
  -2  -1   5    2.38    0.29
   2  -1  -5    2.40    0.30
   2   1  -5    2.28    0.21
   2   1  -5    2.08    0.27
  -2   1   5    2.10    0.29
   2   1  -5    1.84    0.27
   1  -1  -5    0.85    0.21
  -1  -1   5    1.53    0.21
   1  -1  -5    1.27    0.22
   1  -1  -5    1.50    0.21
   1   1  -5    1.35    0.21
   1   1  -5    1.67    0.25
   1   1  -5    1.06    0.19
  -1   1   5    1.11    0.19
   0  -1  -5   35.69    0.91
   0  -1  -5   37.17    0.81
   0  -1  -5   35.12    1.02
   0   1   5   36.88    0.88
   0   1  -5   35.80    1.00
   0   1  -5   36.75    0.75
   0   1  -5   36.86    0.93
  -1  -1  -5    0.86    0.21
  -1  -1  -5    1.21    0.15
  -1  -1  -5    0.67    0.20
  -1   1  -5    1.04    0.23
  -1   1  -5    1.09    0.24
  -1   1  -5    1.34    0.11
  -2  -1  -5    1.92    0.17
  -2  -1  -5    1.66    0.31
  -2  -1  -5    2.29    0.33
  -2   1  -5    1.38    0.27
  -2   1  -5    1.81    0.30
  -3  -1  -5    2.18    0.19
  -3  -1  -5    2.25    0.37
  -3  -1  -5    2.24    0.36
  -3   1  -5    1.91    0.34
  -3   1  -5    1.88    0.35
  -4  -1  -5   11.37    0.68
  -4  -1  -5   10.74    0.39
  -4  -1  -5   10.26    0.65
  -4   1  -5   11.30    0.69
  -4   1  -5   11.44    0.70
  -5  -1  -5    4.22    0.51
  -5  -1  -5    4.50    0.31
  -5  -1  -5    4.13    0.56
  -5   1  -5    3.95    0.23
  -5   1  -5    4.30    0.56
  -5   1  -5    4.00    0.56
  -6  -1  -5   16.36    0.60
  -6  -1  -5   16.76    0.90
  -6  -1  -5   15.62    0.89
  -6   1  -5   15.33    0.90
  -6   1  -5   15.84    0.92
  -6   1  -5   15.90    0.51
  -7  -1  -5    8.00    0.77
  -7  -1  -5    7.94    0.49
  -7   1  -5   10.12    0.80
  -7   1  -5   10.60    0.81
  -8  -1  -5    7.73    0.79
  -8   1  -5    9.52    0.97
  -8   1  -5    7.22    0.81
  -9  -1  -5    2.00    0.48
  -9   1  -5    1.49    0.49
 -11  -2   5   10.79    1.15
 -11   2   5   11.73    1.21
 -10  -2   5    2.34    0.59
  10  -2  -5    2.76    0.62
 -10   2   5    1.53    0.53
   9  -2  -5    5.00    0.71
  -9  -2   5    7.25    0.85
  -9   2   5    5.91    0.76
   9   2  -5    4.83    0.70
  -8  -2   5   24.02    1.22
   8  -2  -5   24.01    1.19
   8   2  -5   25.58    1.28
  -8   2   5   22.64    1.17
   7  -2  -5    0.15    0.29
  -7  -2   5   -0.10    0.22
  -7   2   5   -0.17    0.22
   7   2  -5    0.21    0.29
   6  -2  -5   12.04    0.79
  -6  -2   5   11.91    0.78
  -6   2   5   12.00    0.78
   6   2  -5   10.94    0.79
  -5  -2   5   -0.02    0.21
   5  -2  -5    0.20    0.23
  -5   2   5    0.13    0.21
   5   2  -5    0.18    0.27
   4  -2  -5   33.39    1.10
  -4  -2   5   33.56    1.08
   4   2  -5   32.68    1.08
  -4   2   5   32.13    1.07
   4   2  -5   31.52    0.83
   3  -2  -5   71.99    1.62
  -3  -2   5   69.42    1.57
   3   2  -5   73.96    1.62
   3   2  -5   72.43    1.41
  -2  -2   5    2.41    0.31
   2  -2  -5    1.59    0.26
   2   2  -5    2.11    0.28
   2   2  -5    2.32    0.31
  -2   2   5    2.04    0.29
   2   2  -5    2.31    0.23
   1  -2  -5    0.21    0.16
   1  -2  -5   -0.07    0.13
  -1  -2   5    0.03    0.11
  -1   2   5    0.06    0.13
   1   2  -5    0.05    0.13
   1   2  -5    0.20    0.15
   1   2  -5   -0.02    0.12
   0  -2  -5    7.27    0.37
   0  -2  -5    6.79    0.44
   0   2  -5    7.00    0.31
   0   2  -5    6.56    0.41
   0   2   5    6.63    0.35
   0   2  -5    6.52    0.42
  -1  -2  -5   49.28    1.27
  -1  -2  -5   49.31    1.00
  -1   2  -5   47.74    1.26
  -1   2  -5   48.55    0.79
  -1   2  -5   50.67    1.23
  -2  -2  -5   34.82    1.05
  -2  -2  -5   34.67    1.07
  -2  -2  -5   34.04    0.76
  -2   2  -5   33.71    1.05
  -2   2  -5   33.39    1.08
  -3  -2  -5    0.20    0.20
  -3  -2  -5    0.37    0.21
  -3  -2  -5   -0.04    0.12
  -3   2  -5    0.53    0.23
  -3   2  -5    0.17    0.17
  -4  -2  -5   16.95    0.81
  -4  -2  -5   16.77    0.56
  -4   2  -5   18.56    0.90
  -4   2  -5   15.90    0.80
  -5  -2  -5    2.54    0.42
  -5  -2  -5    2.94    0.31
  -5   2  -5    3.53    0.52
  -5   2  -5    3.34    0.50
  -5   2  -5    3.00    0.18
  -6  -2  -5    4.41    0.40
  -6  -2  -5    4.63    0.58
  -6   2  -5    5.43    0.65
  -6   2  -5    4.70    0.62
  -6   2  -5    4.22    0.28
  -7  -2  -5    1.68    0.30
  -7  -2  -5    2.05    0.45
  -7   2  -5    1.72    0.46
  -7   2  -5    1.71    0.43
  -8  -2  -5    0.77    0.33
  -8  -2  -5    1.03    0.30
  -8   2  -5    0.48    0.38
  -8   2  -5    1.05    0.43
  -9   2  -5   12.12    1.14
 -11  -3   5    1.26    0.54
 -11   3   5    1.43    0.53
 -10  -3   5    1.44    0.50
  10  -3  -5    1.55    0.52
  10   3  -5    2.37    0.62
 -10   3   5    1.93    0.52
   9  -3  -5   11.48    1.05
  -9  -3   5    8.99    0.92
   9   3  -5    8.04    0.88
  -9   3   5    8.52    0.94
   8  -3  -5   39.13    1.55
  -8  -3   5   41.91    1.62
  -8   3   5   38.19    1.53
   8   3  -5   39.93    1.60
  -7  -3   5   12.41    0.84
   7  -3  -5   12.33    0.83
  -7   3   5   11.08    0.80
   7   3  -5   11.53    0.83
   6  -3  -5    9.12    0.70
  -6  -3   5   10.23    0.73
  -6   3   5    8.62    0.69
   6   3  -5    8.80    0.72
  -5  -3   5    5.12    0.59
   5  -3  -5    4.51    0.53
  -5   3   5    4.78    0.54
   5   3  -5    5.02    0.58
   5   3  -5    5.06    0.31
   4  -3  -5    2.22    0.37
  -4  -3   5    3.22    0.43
   4   3  -5    3.09    0.44
   4   3  -5    2.76    0.26
  -3  -3   5    0.29    0.18
   3  -3  -5    0.69    0.23
   3   3  -5    0.39    0.20
   3   3  -5    0.42    0.14
  -3   3   5    0.43    0.20
  -2  -3   5   15.32    0.61
   2  -3  -5   15.62    0.67
   2   3  -5   16.43    0.58
   2   3  -5   15.00    0.63
  -2   3   5   15.86    0.66
  -1  -3   5   72.70    1.40
   1  -3  -5   71.81    1.48
   1   3  -5   70.77    1.41
   1   3  -5   70.25    1.47
   1   3  -5   71.28    1.41
  -1   3   5   71.09    1.47
   0  -3  -5    3.23    0.32
   0  -3  -5    4.51    0.44
   0   3   5    3.88    0.30
   0   3  -5    4.47    0.36
   0   3  -5    3.48    0.26
   0   3  -5    3.34    0.35
  -1  -3  -5    0.23    0.17
  -1  -3  -5    0.16    0.13
  -1   3  -5    0.50    0.21
  -1   3  -5    0.28    0.11
  -1   3  -5    0.09    0.18
   1   3   5    0.51    0.16
  -2  -3  -5    1.26    0.30
  -2  -3  -5    0.79    0.19
  -2   3  -5    0.96    0.26
   2   3   5    1.14    0.20
  -2   3  -5    0.99    0.28
  -3  -3  -5   30.42    0.82
  -3  -3  -5   29.58    1.03
   3   3   5   30.35    0.87
  -3   3  -5   32.11    1.13
  -3   3  -5   28.55    1.04
  -4  -3  -5   26.43    0.79
  -4  -3  -5   26.72    1.01
  -4   3  -5   25.24    1.03
  -4   3  -5   26.41    1.10
  -5  -3  -5    9.18    0.65
  -5  -3  -5    8.09    0.48
  -5   3  -5    7.05    0.68
  -5   3  -5    7.48    0.73
  -5   3  -5    8.44    0.29
  -6  -3  -5    9.67    0.70
  -6  -3  -5    9.79    0.55
  -6   3  -5    9.83    0.77
  -6   3  -5   10.61    0.81
  -7  -3  -5    3.44    0.43
  -7  -3  -5    3.71    0.53
  -7   3  -5    2.86    0.55
  -7   3  -5    4.50    0.66
  -8  -3  -5    0.49    0.34
  -8  -3  -5   -0.21    0.18
  -8   3  -5    0.63    0.36
  -9   3  -5    9.38    1.00
 -10   3  -5   -0.26    0.36
 -11  -4   5    9.97    1.12
 -11   4   5   10.62    1.17
 -10  -4   5   -0.02    0.34
  10   4  -5    0.08    0.38
 -10   4   5    0.03    0.36
  -9  -4   5    2.26    0.56
   9  -4  -5    2.77    0.60
   9   4  -5    2.55    0.60
  -9   4   5    3.02    0.64
   8  -4  -5    0.33    0.35
  -8  -4   5    0.14    0.30
  -8   4   5    0.65    0.36
   8   4  -5    0.50    0.39
  -7  -4   5    5.35    0.67
   7  -4  -5    5.69    0.70
  -7   4   5    6.44    0.73
   7   4  -5    5.03    0.65
  -6  -4   5    0.15    0.26
   6  -4  -5    0.44    0.31
  -6   4   5    0.13    0.27
   6   4  -5    0.62    0.35
   5  -4  -5    1.32    0.35
  -5  -4   5    1.64    0.38
   5   4  -5    1.24    0.17
   5   4  -5    1.52    0.38
   4  -4  -5   90.05    2.07
  -4  -4   5   90.15    2.04
  -4   4   5   89.95    2.06
   4   4  -5   89.73    1.53
   4   4  -5   93.14    2.08
   3  -4  -5    1.62    0.31
  -3  -4   5    1.86    0.31
   3   4  -5    1.78    0.22
   3   4  -5    1.37    0.30
  -3   4   5    1.67    0.31
  -2  -4   5  168.84    2.88
   2  -4  -5  171.40    2.96
   2   4  -5  168.80    2.90
  -2   4   5  170.99    2.95
   2   4  -5  169.60    2.71
   1  -4  -5  164.57    2.83
  -1  -4   5  166.61    2.70
   1   4  -5  163.98    2.71
  -1   4   5  166.20    2.81
   1   4  -5  165.90    2.76
   0  -4  -5    3.14    0.36
   0  -4  -5    2.40    0.34
   0  -4   5    3.15    0.26
   0   4   5    2.65    0.31
   0   4  -5    3.46    0.31
   0   4  -5    4.52    0.43
   0   4  -5    2.62    0.33
  -1  -4  -5    2.89    0.36
  -1  -4  -5    3.62    0.35
   1   4   5    3.50    0.35
  -1   4  -5    2.79    0.24
  -1   4  -5    3.27    0.38
  -1   4  -5    2.66    0.36
  -2  -4  -5  129.64    2.51
  -2  -4  -5  130.21    2.27
  -2   4  -5  131.54    1.92
  -2   4  -5  130.20    2.53
  -2   4  -5  127.39    2.58
   2   4   5  131.73    2.25
  -3  -4  -5    6.65    0.51
  -3  -4  -5    6.50    0.44
  -3   4  -5    6.45    0.24
   3   4   5    6.07    0.41
  -3   4  -5    6.28    0.63
  -3   4  -5    7.12    0.54
  -3   4  -5    6.38    0.24
  -4  -4  -5    0.35    0.23
  -4  -4  -5    0.80    0.24
  -4   4  -5    1.09    0.35
  -4   4  -5    0.37    0.10
  -4   4  -5    0.60    0.29
  -5  -4  -5    0.16    0.21
  -5  -4  -5    0.14    0.22
  -5   4  -5   -0.18    0.23
  -5   4  -5    0.13    0.10
  -5   4  -5    0.40    0.26
  -6  -4  -5   18.11    0.79
  -6  -4  -5   18.63    0.92
  -6   4  -5   20.89    1.08
  -6   4  -5   21.31    1.12
  -7  -4  -5    0.38    0.25
  -7  -4  -5    0.13    0.26
  -7   4  -5    0.56    0.35
  -7   4  -5    0.29    0.35
  -8  -4  -5    1.54    0.36
  -8   4  -5    0.59    0.39
  -9  -4  -5    0.80    0.32
  -9   4  -5    0.17    0.38
 -10   4  -5    0.90    0.47
 -11  -5   5   10.73    1.19
 -11   5   5   11.47    1.25
 -10  -5   5    8.41    1.01
 -10   5   5    8.01    1.00
  10   5  -5    7.87    0.98
  -9  -5   5    4.69    0.76
   9  -5  -5    4.23    0.68
   9   5  -5    3.96    0.70
  -9   5   5    4.40    0.70
   8  -5  -5    5.40    0.74
  -8  -5   5    5.63    0.73
  -8   5   5    5.63    0.74
   8   5  -5    5.21    0.72
   7  -5  -5    7.81    0.80
  -7  -5   5    9.54    0.91
  -7   5   5    8.08    0.81
   7   5  -5   12.10    0.91
  -6  -5   5   52.99    1.69
   6  -5  -5   57.31    1.73
  -6   5   5   52.07    1.66
   6   5  -5   54.12    1.74
   5  -5  -5   43.56    1.43
  -5  -5   5   41.53    1.40
   5   5  -5   41.48    1.43
  -5   5   5   42.76    1.42
  -4  -5   5    6.56    0.62
   4  -5  -5    4.46    0.52
   4   5  -5    5.19    0.58
  -4   5   5    4.88    0.53
   4   5  -5    5.43    0.27
   3  -5  -5    5.17    0.51
  -3  -5   5    4.41    0.48
   3   5  -5    5.12    0.30
  -3   5   5    5.73    0.55
   3   5  -5    4.03    0.46
  -2  -5   5   21.92    0.81
   2  -5  -5   23.20    0.88
  -2   5   5   23.56    0.88
   2   5  -5   24.25    0.72
   2   5  -5   23.57    0.86
  -1  -5   5   10.80    0.52
   1  -5  -5   10.59    0.59
   1   5  -5   10.59    0.52
  -1   5   5    9.99    0.55
   1   5  -5   10.54    0.54
   0  -5  -5    7.54    0.49
   0  -5   5    7.63    0.41
   0   5   5    7.85    0.48
   0   5  -5    6.58    0.46
   0   5  -5    8.04    0.44
  -1  -5  -5   13.04    0.66
  -1  -5  -5   11.96    0.60
  -1   5  -5   12.08    0.49
  -1   5  -5   11.75    0.64
  -1   5  -5   12.82    0.67
   1   5   5   12.67    0.59
  -2  -5  -5    0.01    0.14
  -2  -5  -5    0.03    0.16
  -2   5  -5    0.12    0.18
   2   5   5    0.48    0.19
  -2   5  -5   -0.06    0.18
  -2   5  -5   -0.04    0.11
  -3  -5  -5   13.27    0.65
  -3  -5  -5   14.19    0.72
   3   5   5   13.50    0.63
  -3   5  -5   14.44    0.81
  -3   5  -5   14.42    0.45
  -3   5  -5   13.82    0.75
  -4  -5  -5   57.82    1.55
  -4  -5  -5   57.79    1.45
  -4   5  -5   60.68    1.79
  -4   5  -5   56.34    1.68
  -5  -5  -5   34.88    1.13
  -5  -5  -5   37.06    1.24
  -5   5  -5   38.99    1.42
  -5   5  -5   33.45    1.39
  -5   5  -5   37.72    0.83
  -6  -5  -5   11.46    0.74
  -6  -5  -5   11.81    0.70
  -6   5  -5   12.26    0.87
  -6   5  -5   12.68    0.92
  -7  -5  -5    1.04    0.32
  -7   5  -5    0.05    0.28
  -8  -5  -5    5.20    0.61
  -8   5  -5    5.09    0.72
  -9  -5  -5    0.45    0.32
  -9   5  -5    0.44    0.44
 -11  -6   5    0.28    0.48
 -11   6   5    0.53    0.47
 -10  -6   5    0.33    0.47
  10   6  -5    0.44    0.50
 -10   6   5    0.73    0.40
   9  -6  -5    2.44    0.56
  -9  -6   5    2.18    0.54
  -9   6   5    1.90    0.51
   9   6  -5    1.95    0.57
  -8  -6   5    2.84    0.61
   8  -6  -5    4.07    0.67
   8   6  -5    3.19    0.65
  -8   6   5    3.47    0.61
   7  -6  -5    2.00    0.48
  -7  -6   5    1.47    0.44
   7   6  -5    3.15    0.60
  -7   6   5    2.41    0.47
   6  -6  -5   13.62    0.86
  -6  -6   5   13.51    0.89
   6   6  -5   13.43    0.93
  -6   6   5   13.13    0.86
   5  -6  -5    8.04    0.65
  -5  -6   5    8.41    0.78
   5   6  -5    9.07    0.74
  -5   6   5    8.49    0.66
  -4  -6   5   15.66    0.84
  -4   6   5   17.32    0.87
   4   6  -5   16.29    0.88
  -3  -6   5   35.35    1.16
   3  -6  -5   36.65    1.23
   3   6  -5   35.06    1.19
  -3   6   5   36.66    1.22
   3   6  -5   34.74    0.81
   2  -6  -5  125.96    2.56
  -2  -6   5  128.67    2.46
   2   6  -5  127.00    2.19
   2   6  -5  129.28    2.50
  -2   6   5  128.26    2.54
  -1  -6   5   14.62    0.65
   1  -6  -5   13.59    0.69
   1   6  -5   12.82    0.58
  -1   6   5   13.86    0.68
   1   6  -5   13.95    0.66
   0  -6  -5   15.54    0.72
   0  -6   5   15.39    0.63
   0   6   5   16.75    0.73
   0   6  -5   15.59    0.65
   0   6  -5   15.95    0.69
  -1  -6  -5   14.19    0.69
  -1  -6  -5   15.66    0.76
   1  -6   5   13.30    0.56
  -1   6  -5   14.41    0.72
   1   6   5   14.87    0.68
  -1   6  -5   14.93    0.59
  -2  -6  -5   10.76    0.63
  -2  -6  -5   10.00    0.61
  -2   6  -5    9.77    0.65
  -2   6  -5   10.21    0.48
  -2   6  -5   10.60    0.68
   2   6   5   10.03    0.57
  -3  -6  -5    0.51    0.25
  -3  -6  -5    0.33    0.22
   3   6   5    0.02    0.20
  -3   6  -5    0.57    0.18
  -3   6  -5    0.14    0.20
  -3   6  -5    0.49    0.27
  -4  -6  -5   13.87    0.75
  -4  -6  -5   14.08    0.73
  -4   6  -5   15.48    0.89
  -4   6  -5   15.00    0.54
  -4   6  -5   14.30    0.86
  -5  -6  -5   13.71    0.76
  -5  -6  -5   14.00    0.76
  -5   6  -5   13.68    0.90
  -5   6  -5   14.41    0.90
  -5   6  -5   14.05    0.53
  -6  -6  -5    6.90    0.66
  -6  -6  -5    5.62    0.61
  -6   6  -5    5.70    0.73
  -7  -6  -5   25.55    1.09
  -7   6  -5   24.37    1.27
  -8  -6  -5   -0.12    0.25
  -8   6  -5   -0.18    0.29
  -9  -6  -5    0.67    0.37
  -9   6  -5    0.99    0.48
 -10  -7   5    0.18    0.39
  10   7  -5    0.92    0.58
 -10   7   5   -0.26    0.32
  -9  -7   5    2.14    0.62
   9  -7  -5    2.47    0.63
  -9   7   5    1.82    0.52
   9   7  -5    2.45    0.63
   8  -7  -5    3.29    0.60
  -8  -7   5    4.34    0.73
  -8   7   5    2.53    0.54
   8   7  -5    3.36    0.68
  -7  -7   5    1.13    0.43
   7  -7  -5    1.76    0.46
   7   7  -5    1.31    0.48
  -7   7   5    1.51    0.44
   6  -7  -5    5.05    0.68
  -6  -7   5    4.50    0.64
  -6   7   5    5.48    0.70
   6   7  -5    4.25    0.64
   5  -7  -5    8.36    0.82
  -5  -7   5    9.49    0.76
  -5   7   5    9.20    0.85
   5   7  -5    9.43    0.88
   4  -7  -5    2.41    0.46
  -4  -7   5    2.23    0.43
  -4   7   5    1.75    0.41
   4   7  -5    1.59    0.40
  -3  -7   5   57.04    1.57
   3  -7  -5   52.63    1.56
   3   7  -5   54.04    1.57
  -3   7   5   52.04    1.54
   3   7  -5   53.60    1.09
   2  -7  -5   24.10    1.00
  -2  -7   5   25.28    0.96
   2   7  -5   24.40    0.99
  -2   7   5   23.07    0.97
   2   7  -5   24.91    0.76
   1  -7  -5    1.71    0.36
  -1  -7   5    0.99    0.26
   1   7  -5    1.03    0.30
  -1   7   5    1.27    0.33
   1   7  -5    1.10    0.24
   0  -7  -5   16.79    0.82
   0  -7   5   16.05    0.69
   0   7  -5   17.28    0.75
   0   7  -5   16.17    0.73
   0   7   5   16.50    0.78
  -1  -7  -5  100.17    2.16
   1  -7   5   94.27    1.88
  -1  -7  -5   93.97    2.12
  -1   7  -5   95.60    1.90
  -1   7  -5   96.20    2.14
   1   7   5   97.15    2.09
  -2  -7  -5    0.90    0.28
  -2  -7  -5    0.53    0.24
  -2   7  -5    0.57    0.25
  -2   7  -5    1.01    0.23
   2   7   5    0.61    0.27
  -2   7  -5    0.91    0.30
  -3  -7  -5    0.40    0.22
  -3  -7  -5    0.16    0.23
  -3   7  -5    0.03    0.21
  -3   7  -5    0.13    0.21
   3   7   5    0.54    0.26
  -3   7  -5    0.08    0.16
  -4  -7  -5    5.57    0.57
  -4  -7  -5    5.63    0.59
  -4   7  -5    5.00    0.65
  -4   7  -5    5.46    0.69
  -4   7  -5    5.74    0.40
  -5  -7  -5   43.90    1.38
  -5  -7  -5   43.38    1.40
  -5   7  -5   41.51    1.55
  -6  -7  -5    4.85    0.61
  -6   7  -5    5.37    0.73
  -6   7  -5    5.13    0.40
  -7  -7  -5    9.89    0.76
  -7   7  -5    8.93    0.94
  -8  -7  -5    6.83    0.76
  -8   7  -5    5.90    0.81
  -9  -7  -5   15.91    1.03
  -9   7  -5   15.10    1.18
 -10  -8   5    1.18    0.56
 -10   8   5    1.23    0.53
  10   8  -5    0.56    0.50
  -9  -8   5    0.82    0.48
   9  -8  -5    0.51    0.45
   9   8  -5    0.20    0.48
  -9   8   5    1.61    0.53
  -8  -8   5    1.57    0.53
   8  -8  -5    1.81    0.52
  -8   8   5    0.78    0.43
   8   8  -5    1.98    0.60
  -7  -8   5    0.10    0.29
   7  -8  -5    0.48    0.39
  -7   8   5    0.06    0.34
   7   8  -5    0.09    0.35
   6  -8  -5    6.18    0.72
  -6  -8   5    5.82    0.73
   6   8  -5    6.40    0.77
  -6   8   5    7.24    0.76
   5  -8  -5   -0.11    0.25
  -5  -8   5    0.07    0.25
   5   8  -5   -0.08    0.26
  -5   8   5   -0.05    0.24
  -4  -8   5    2.44    0.48
   4  -8  -5    1.48    0.43
   4   8  -5    2.13    0.48
  -4   8   5    1.28    0.38
  -3  -8   5   48.28    1.49
   3  -8  -5   50.60    1.58
   3   8  -5   47.05    1.52
  -3   8   5   47.29    1.53
   2  -8  -5   -0.16    0.25
  -2  -8   5    0.63    0.27
  -2   8   5    0.06    0.23
   2   8  -5    0.05    0.29
  -1  -8   5    5.79    0.56
   1  -8  -5    3.31    0.47
  -1   8   5    4.52    0.53
   1   8  -5    4.18    0.50
   1   8  -5    3.82    0.40
   0  -8  -5    2.31    0.44
   0  -8   5    1.92    0.34
   0   8  -5    2.24    0.37
   0   8  -5    1.90    0.33
   0   8   5    1.77    0.39
  -1  -8  -5    0.66    0.31
   1  -8   5    0.42    0.22
   1   8   5    0.77    0.29
  -1   8  -5    0.72    0.27
  -1   8  -5    0.91    0.29
  -2  -8  -5   12.16    0.72
  -2  -8  -5   12.65    0.76
  -2   8  -5   12.98    0.64
   2   8   5   12.61    0.74
  -2   8  -5   12.37    0.78
  -3  -8  -5    0.09    0.25
  -3  -8  -5    0.21    0.22
   3   8   5    0.20    0.26
  -3   8  -5    0.30    0.21
  -3   8  -5    0.04    0.27
  -4  -8  -5    3.86    0.53
  -4  -8  -5    3.96    0.50
  -4   8  -5    2.47    0.49
  -4   8  -5    2.52    0.34
  -5  -8  -5    0.80    0.33
  -5  -8  -5    0.94    0.29
  -5   8  -5    0.81    0.38
  -5   8  -5    0.57    0.22
  -6  -8  -5   15.18    0.92
  -6   8  -5   13.42    0.95
  -6   8  -5   13.68    0.65
  -7  -8  -5    2.60    0.53
  -7   8  -5    2.13    0.58
  -8  -8  -5    0.13    0.35
  -8   8  -5    0.25    0.39
  -9  -8  -5   10.85    1.02
  -9   8  -5   10.12    1.10
 -10  -9   5   23.59    1.53
 -10   9   5   25.49    1.53
  10   9  -5   26.25    1.64
  -9  -9   5    0.49    0.47
  -9   9   5    0.17    0.36
   9   9  -5    0.04    0.43
  -8  -9   5    0.12    0.38
   8  -9  -5    0.10    0.33
  -8   9   5    0.37    0.33
   8   9  -5    0.97    0.53
   7  -9  -5   15.62    1.06
  -7  -9   5   16.69    1.13
   7   9  -5   16.91    1.20
  -7   9   5   13.88    1.00
  -6  -9   5    0.99    0.41
   6  -9  -5    1.02    0.46
  -6   9   5    1.09    0.42
   6   9  -5    0.89    0.46
   5  -9  -5    8.60    0.88
  -5  -9   5    7.12    0.77
  -5   9   5    9.35    0.91
   5   9  -5    7.95    0.82
   4  -9  -5   10.46    0.78
  -4  -9   5   10.90    0.82
  -4   9   5   13.42    0.86
   4   9  -5   12.15    0.90
  -3  -9   5    0.01    0.28
   3  -9  -5   -0.05    0.27
   3   9  -5    0.11    0.33
  -3   9   5    0.20    0.29
  -2  -9   5   14.86    0.81
   2  -9  -5   14.38    0.89
   2   9  -5   13.78    0.85
  -2   9   5   15.27    0.89
  -1  -9   5   51.35    1.49
   1  -9  -5   49.24    1.58
   1   9  -5   51.71    1.54
  -1   9   5   50.77    1.57
   0  -9   5    1.04    0.32
   0  -9  -5    1.66    0.42
   0   9  -5    1.22    0.33
   0   9   5    0.44    0.29
  -1  -9  -5    3.29    0.53
   1   9   5    2.60    0.45
  -1   9  -5    3.46    0.46
  -2  -9  -5    2.38    0.48
  -2  -9  -5    1.24    0.32
  -2   9  -5    2.30    0.39
   2   9   5    1.72    0.38
  -3  -9  -5    1.66    0.43
  -3  -9  -5    2.07    0.39
  -3   9  -5    2.42    0.36
   3   9   5    1.49    0.40
  -3   9  -5    1.25    0.36
  -4  -9  -5   16.72    0.96
  -4  -9  -5   17.65    0.87
  -4   9  -5   17.55    0.77
  -4   9  -5   17.26    1.01
  -5  -9  -5    2.78    0.52
  -5   9  -5    2.61    0.57
  -5   9  -5    2.55    0.37
  -6  -9  -5   -0.12    0.30
  -6   9  -5    0.01    0.32
  -7  -9  -5    5.41    0.71
  -7   9  -5    5.50    0.82
  -8  -9  -5    0.38    0.36
  -8   9  -5    0.45    0.40
  -9 -10   5    2.32    0.70
  -9  10   5    2.27    0.61
   9  10  -5    2.38    0.73
   8 -10  -5   -0.50    0.27
  -8 -10   5    0.43    0.41
   8  10  -5   -0.58    0.35
  -7 -10   5    3.13    0.62
   7 -10  -5    4.50    0.71
  -7  10   5    2.80    0.59
   7  10  -5    2.57    0.63
   6 -10  -5    7.38    0.90
  -6 -10   5    7.02    0.87
   6  10  -5    6.09    0.84
  -6  10   5    7.08    0.86
  -5 -10   5   25.47    1.30
   5 -10  -5   28.23    1.35
  -5  10   5   26.63    1.30
   5  10  -5   26.64    1.36
   4 -10  -5   34.74    1.45
  -4 -10   5   33.49    1.40
   4  10  -5   33.81    1.45
  -4  10   5   34.99    1.42
  -3 -10   5   24.95    1.14
   3 -10  -5   24.39    1.20
  -3  10   5   26.17    1.22
   3  10  -5   23.52    1.16
   2 -10  -5   -0.17    0.29
  -2 -10   5    0.64    0.29
   2  10  -5    0.43    0.31
  -2  10   5    0.89    0.36
   1 -10  -5    0.96    0.37
  -1 -10   5    0.85    0.32
   1  10  -5    0.39    0.31
  -1  10   5    0.54    0.33
   0 -10  -5    0.19    0.28
   0 -10   5   -0.04    0.22
   0  10   5   -0.08    0.24
   0  10  -5    0.18    0.28
  -1 -10  -5   29.68    1.26
   1  10   5   32.93    1.29
  -1  10  -5   32.20    1.18
  -2 -10  -5    0.60    0.33
  -2 -10  -5    0.30    0.25
  -2  10  -5    0.16    0.24
   2  10   5    0.16    0.29
  -3 -10  -5    6.01    0.61
  -3 -10  -5    4.30    0.63
  -3  10  -5    4.83    0.65
   3  10   5    4.70    0.65
  -3  10  -5    6.53    0.61
  -4 -10  -5    0.79    0.37
  -4  10  -5    0.60    0.33
  -4  10  -5    0.45    0.26
  -5 -10  -5   10.22    0.93
  -5  10  -5    9.75    0.64
  -5  10  -5    9.37    0.96
  -6 -10  -5    0.31    0.35
  -6  10  -5    0.76    0.28
  -6  10  -5    0.32    0.38
  -7 -10  -5    0.78    0.41
  -7  10  -5    0.77    0.41
  -8 -10  -5    2.62    0.62
  -8  10  -5    2.26    0.64
  -9 -11   5    9.32    1.18
   9  11  -5    5.79    0.96
  -9  11   5    7.14    1.00
  -8 -11   5    4.81    0.81
   8 -11  -5    4.22    0.78
   8  11  -5    2.84    0.72
  -8  11   5    5.10    0.86
   7 -11  -5   20.41    1.29
  -7 -11   5   20.59    1.33
  -7  11   5   25.21    1.41
   7  11  -5   23.35    1.46
  -6 -11   5   14.58    1.11
   6 -11  -5   17.33    1.18
  -6  11   5   18.67    1.20
   6  11  -5   17.73    1.25
  -5 -11   5    0.37    0.36
   5 -11  -5    0.31    0.33
   5  11  -5    0.05    0.42
  -5  11   5    0.23    0.33
   4 -11  -5   32.71    1.47
  -4 -11   5   30.67    1.38
  -4  11   5   33.25    1.47
   4  11  -5   31.35    1.44
  -3 -11   5    3.09    0.55
   3 -11  -5    2.55    0.56
  -3  11   5    2.74    0.55
   3  11  -5    3.68    0.63
   2 -11  -5    7.52    0.80
  -2 -11   5    7.27    0.76
  -2  11   5    6.10    0.72
   2  11  -5    6.62    0.76
   1 -11  -5    0.78    0.35
  -1 -11   5    0.71    0.34
  -1  11   5    0.32    0.30
   1  11  -5    0.35    0.33
   0 -11  -5    1.32    0.40
   0  11   5    0.81    0.37
   0  11  -5    1.21    0.38
  -1 -11  -5    0.20    0.30
  -1  11  -5   -0.25    0.24
   1  11   5    0.21    0.29
  -2 -11  -5    1.02    0.37
  -2 -11  -5    0.28    0.27
   2  11   5    0.74    0.34
  -2  11  -5    0.98    0.34
  -3 -11  -5    8.31    0.64
  -3 -11  -5    8.12    0.83
  -3  11  -5    9.04    0.67
   3  11   5    8.70    0.84
  -4 -11  -5    0.41    0.35
  -4  11  -5    0.16    0.26
  -4  11  -5    0.50    0.33
  -5 -11  -5    4.91    0.75
  -5  11  -5    4.08    0.68
  -5  11  -5    3.96    0.51
  -6 -11  -5   12.81    1.14
  -6  11  -5   10.75    0.71
  -6  11  -5   12.79    1.20
  -7 -11  -5   10.81    1.07
  -7  11  -5    7.65    0.95
  -8 -12   5    0.61    0.50
   8  12  -5    1.20    0.61
  -8  12   5    0.36    0.47
  -7 -12   5   13.90    1.35
   7 -12  -5    8.90    1.04
  -7  12   5    9.67    1.08
   7  12  -5   10.01    1.21
   6 -12  -5   37.70    1.73
  -6 -12   5   35.84    1.69
   6  12  -5   35.54    1.77
  -6  12   5   38.00    1.73
  -5 -12   5    4.39    0.72
   5 -12  -5    7.04    0.93
   5  12  -5    6.64    0.90
  -5  12   5    6.08    0.84
   4 -12  -5    3.05    0.64
  -4 -12   5    1.96    0.52
  -4  12   5    1.64    0.52
   4  12  -5    3.05    0.66
   3 -12  -5    1.06    0.46
  -3 -12   5    0.50    0.32
   3  12  -5    1.30    0.47
  -2 -12   5    0.71    0.35
   2 -12  -5    1.17    0.44
   2  12  -5    0.55    0.41
  -2  12   5    0.20    0.33
  -1 -12   5    8.56    0.82
   1 -12  -5    7.01    0.83
  -1  12   5    6.48    0.77
   1  12  -5    7.29    0.78
   0 -12  -5   45.33    1.75
   0  12  -5   49.29    1.65
   0  12   5   50.01    1.76
  -1 -12  -5   33.71    1.47
   1  12   5   33.60    1.45
  -1  12  -5   31.77    1.29
  -2 -12  -5    3.75    0.55
  -2 -12  -5    3.17    0.56
  -2  12  -5    5.25    0.63
   2  12   5    3.79    0.61
  -3 -12  -5   12.30    0.96
   3  12   5   12.19    0.93
  -3  12  -5   11.06    0.79
  -4 -12  -5    0.24    0.37
  -4  12  -5    0.45    0.37
  -4  12  -5    0.12    0.28
  -5 -12  -5    0.66    0.38
  -5  12  -5    0.11    0.35
  -5  12  -5   -0.36    0.21
  -6 -12  -5    1.46    0.51
  -6  12  -5    0.40    0.45
  -6  12  -5    0.17    0.27
  -7 -12  -5    3.57    0.71
  -7  12  -5    2.89    0.70
  -8 -13   5    3.93    0.82
  -8  13   5    2.77    0.73
   8  13  -5    1.25    0.69
   7 -13  -5   24.68    1.53
  -7 -13   5   24.28    1.51
  -7  13   5   22.97    1.48
   7  13  -5   24.00    1.61
   6 -13  -5    4.86    0.83
  -6 -13   5    3.06    0.69
  -6  13   5    3.51    0.72
   6  13  -5    5.36    0.94
  -5 -13   5    0.22    0.40
   5 -13  -5    0.34    0.38
   5  13  -5    0.38    0.45
  -5  13   5    0.12    0.36
   4 -13  -5    3.16    0.65
  -4 -13   5    3.12    0.65
  -4  13   5    2.74    0.61
   4  13  -5    3.25    0.71
  -3 -13   5    0.39    0.38
   3 -13  -5    1.06    0.48
   3  13  -5    0.81    0.47
  -3  13   5    0.38    0.41
  -2 -13   5   -0.03    0.29
   2 -13  -5    0.28    0.37
  -2  13   5    0.12    0.33
   2  13  -5   -0.03    0.35
   1 -13  -5   17.08    1.10
  -1  13   5   15.69    1.08
   1  13  -5   15.56    1.04
   0 -13  -5    0.36    0.40
   0  13  -5    0.14    0.33
   0  13   5    0.23    0.32
  -1 -13  -5   12.50    0.97
  -1  13  -5   12.37    0.91
   1  13   5   12.21    0.94
  -2 -13  -5   17.58    1.00
  -2 -13  -5   17.02    1.12
  -2  13  -5   17.62    1.01
   2  13   5   17.34    1.14
  -3 -13  -5    0.01    0.35
   3  13   5   -0.37    0.32
  -3  13  -5   -0.11    0.27
  -4 -13  -5    2.75    0.63
  -4  13  -5    3.32    0.65
  -4  13  -5    4.14    0.61
  -5 -13  -5    1.39    0.53
  -5  13  -5    0.78    0.36
  -5  13  -5    0.78    0.45
  -6 -13  -5    6.20    0.88
  -6  13  -5    4.70    0.62
  -6  13  -5    4.72    0.82
  -7 -14   5   10.62    1.20
   7 -14  -5    9.60    1.18
  -7  14   5    8.59    1.10
   7  14  -5   10.65    1.25
  -6 -14   5    1.01    0.57
   6 -14  -5    1.13    0.56
   6  14  -5    0.49    0.50
  -6  14   5    1.49    0.60
  -5 -14   5    8.25    1.03
   5 -14  -5   11.97    1.20
  -5  14   5   10.89    1.17
   5  14  -5    8.54    1.10
  -4 -14   5    1.27    0.50
   4 -14  -5    2.24    0.64
  -4  14   5    1.79    0.62
   4  14  -5    1.90    0.59
  -3 -14   5    0.29    0.38
   3 -14  -5    0.37    0.40
   3  14  -5    0.33    0.43
  -3  14   5    0.68    0.48
  -2 -14   5    0.00    0.31
   2 -14  -5   -0.09    0.40
  -2  14   5    0.73    0.43
   2  14  -5    0.28    0.39
   1 -14  -5    0.65    0.39
   1  14  -5   -0.08    0.34
  -1  14   5    0.11    0.33
   0 -14  -5   67.87    2.30
   0  14  -5   67.52    2.17
   0  14   5   68.88    2.28
  -1 -14  -5   24.74    1.40
  -1  14  -5   25.34    1.28
   1  14   5   22.90    1.32
  -2 -14  -5   33.73    1.63
   2  14   5   34.43    1.62
  -2  14  -5   32.06    1.43
  -3 -14  -5   13.04    1.04
  -3  14  -5   13.01    0.94
   3  14   5   14.24    1.10
  -4 -14  -5   -0.41    0.32
  -4  14  -5    0.07    0.33
  -4  14  -5    0.09    0.36
  -5 -14  -5    2.98    0.70
  -5  14  -5    2.24    0.60
  -5  14  -5    2.62    0.50
  -6 -14  -5   -0.52    0.36
  -6  14  -5   -0.24    0.27
  -6  14  -5   -0.33    0.37
   6 -15  -5   -0.02    0.50
  -6 -15   5   -0.06    0.44
  -6  15   5    0.20    0.49
   6  15  -5    0.11    0.57
   5 -15  -5    6.98    0.98
  -5 -15   5    6.39    0.94
  -5  15   5    5.38    0.88
   5  15  -5    7.52    1.05
  -4 -15   5    8.19    1.03
   4 -15  -5    8.58    1.05
   4  15  -5    7.84    1.06
  -4  15   5    8.96    1.06
   3 -15  -5   -0.13    0.43
  -3 -15   5    0.99    0.49
  -3  15   5    1.60    0.56
   3  15  -5    1.17    0.54
   2 -15  -5    1.32    0.52
  -2  15   5    0.92    0.44
   2  15  -5    2.05    0.62
   1 -15  -5    0.33    0.40
   1  15  -5    0.41    0.43
  -1  15   5   -0.04    0.33
   0 -15  -5    0.79    0.54
   0  15   5    0.47    0.42
   0  15  -5    0.25    0.39
  -1 -15  -5    2.44    0.63
  -1  15  -5    2.21    0.58
   1  15   5    1.25    0.51
  -2 -15  -5   13.72    1.12
  -2  15  -5   13.14    1.00
   2  15   5   14.55    1.11
  -3 -15  -5   20.34    1.36
  -3  15  -5   21.34    1.22
  -4 -15  -5    0.31    0.49
  -4  15  -5    0.41    0.43
  -4  15  -5    0.05    0.34
  -5 -15  -5    0.12    0.46
  -5  15  -5    0.16    0.40
  -5  15  -5    0.03    0.31
  -5 -16   5    1.32    0.56
   5 -16  -5    2.42    0.72
  -5  16   5    1.76    0.62
   5  16  -5    1.61    0.63
  -4 -16   5   14.15    1.37
   4 -16  -5   14.52    1.41
  -4  16   5   17.40    1.36
   4  16  -5   17.14    1.37
   3 -16  -5    0.27    0.47
  -3 -16   5   -0.08    0.34
   3  16  -5    0.09    0.44
  -3  16   5   -0.48    0.32
   2 -16  -5    0.25    0.43
  -2  16   5    1.07    0.49
   2  16  -5    0.66    0.44
   1 -16  -5    0.61    0.52
  -1  16   5   -0.06    0.42
   1  16  -5    0.01    0.43
   0 -16  -5    4.29    0.84
   0  16  -5    4.05    0.70
   0  16   5    4.21    0.83
  -1 -16  -5    8.89    1.09
   1  16   5   12.02    1.23
  -1  16  -5   10.28    1.04
  -2 -16  -5   -0.50    0.42
   2  16   5    0.36    0.46
  -2  16  -5    0.01    0.39
  -3 -16  -5    1.00    0.55
  -3  16  -5    1.25    0.49
   3 -17  -5    0.55    0.57
   3  17  -5    0.39    0.54
  -3  17   5    0.20    0.50
   2 -17  -5    0.45    0.50
   2  17  -5    0.29    0.49
  -2  17   5    0.81    0.49
   1 -17  -5    4.33    0.86
  -1  17   5    3.60    0.75
   1  17  -5    4.02    0.78
   0 -17  -5   22.22    1.54
   0  17  -5   18.97    1.33
   0  17   5   19.23    1.44
  -1 -17  -5    1.73    0.71
  -1  17  -5    1.57    0.57
   1  17   5    0.40    0.49
  -2 -17  -5    7.69    1.11
  -2  17  -5    5.99    0.85
   2  17   5    7.30    1.08
 -11   0   6    0.51    0.47
  11   0  -6    0.34    0.50
  10   0  -6    0.66    0.44
 -10   0   6    0.19    0.32
   9   0  -6    0.04    0.32
  -9   0   6    0.03    0.28
  -8   0   6   21.11    1.16
   8   0  -6   21.19    1.15
   7   0  -6   -0.21    0.25
  -7   0   6    0.13    0.27
  -6   0   6  103.53    2.45
   6   0  -6  109.01    2.53
  -5   0   6   -0.03    0.22
   5   0  -6   -0.05    0.24
  -4   0   6    9.06    0.58
   4   0  -6   10.31    0.63
  -3   0   6   -0.01    0.15
   3   0  -6    0.19    0.09
   3   0  -6   -0.15    0.16
   3   0  -6    0.22    0.18
   2   0  -6  103.36    1.98
   2   0  -6  104.01    2.07
   2   0  -6  107.87    1.74
  -2   0   6  109.04    2.00
   1   0  -6    0.01    0.12
   1   0  -6    0.01    0.13
   1   0  -6   -0.01    0.16
  -1   0   6    0.01    0.11
   0   0  -6  396.45    6.02
   0   0  -6  403.84    5.50
   0   0  -6  402.45    5.72
  -1   0  -6   -0.05    0.14
  -1   0  -6    0.01    0.16
  -1   0  -6   -0.02    0.08
  -2   0  -6   15.41    0.73
  -2   0  -6   16.79    0.79
  -3   0  -6    0.05    0.20
  -3   0  -6   -0.13    0.18
  -4   0  -6    0.41    0.26
  -4   0  -6    0.13    0.23
  -5   0  -6   -0.16    0.19
  -5   0  -6   -0.07    0.22
  -6   0  -6  105.17    2.61
  -6   0  -6  109.65    2.67
  -7   0  -6    0.06    0.30
  -7   0  -6    0.40    0.30
  -8   0  -6    1.08    0.40
  -9   0  -6   -0.13    0.30
 -11  -1   6    3.10    0.69
 -11   1   6    2.08    0.58
  11   1  -6    3.03    0.72
  10  -1  -6    0.23    0.34
 -10  -1   6    0.02    0.35
  10   1  -6    0.25    0.42
 -10   1   6   -0.06    0.28
   9  -1  -6    3.27    0.62
  -9  -1   6    3.59    0.64
   9   1  -6    2.40    0.61
  -9   1   6    3.25    0.62
   8  -1  -6    1.50    0.48
  -8  -1   6    0.45    0.37
  -8   1   6    1.46    0.46
   8   1  -6    1.62    0.52
  -7  -1   6   14.29    0.93
   7  -1  -6   15.26    0.96
  -7   1   6   14.50    0.93
   7   1  -6   15.04    0.96
   6  -1  -6   11.83    0.83
  -6  -1   6    9.93    0.73
   6   1  -6   10.56    0.75
  -6   1   6   11.12    0.79
  -5  -1   6    8.60    0.62
   5  -1  -6    8.71    0.66
   5   1  -6    8.40    0.66
  -5   1   6    8.48    0.64
  -4  -1   6   14.86    0.73
   4  -1  -6   13.50    0.73
   4   1  -6   13.35    0.71
   4   1  -6   14.60    0.63
  -4   1   6   14.90    0.75
   4   1  -6   14.42    0.32
   3  -1  -6   54.53    1.39
  -3  -1   6   53.76    1.34
  -3   1   6   52.06    1.35
   3   1  -6   54.93    0.98
   3   1  -6   52.75    1.28
   3   1  -6   54.76    1.38
  -2  -1   6    5.10    0.37
   2  -1  -6    3.89    0.41
   2  -1  -6    5.36    0.41
   2   1  -6    5.09    0.31
   2   1  -6    4.90    0.40
   2   1  -6    4.78    0.39
  -2   1   6    4.68    0.36
   1  -1  -6   22.78    0.72
   1  -1  -6   23.64    0.85
   1  -1  -6   23.01    0.69
  -1  -1   6   22.27    0.66
   1   1  -6   22.36    0.70
   1   1  -6   22.31    0.82
  -1   1   6   23.70    0.71
   1   1  -6   21.60    0.68
   0  -1  -6   28.55    0.73
   0  -1  -6   28.64    0.97
   0  -1  -6   28.01    0.85
   0   1  -6   29.14    0.69
   0   1  -6   27.66    0.94
   0   1   6   29.87    0.73
   0   1  -6   27.17    0.85
  -1  -1  -6    3.35    0.40
  -1  -1  -6    3.30    0.43
  -1  -1  -6    3.52    0.24
  -1   1  -6    3.40    0.40
  -1   1  -6    3.68    0.44
  -1   1  -6    3.26    0.17
  -2  -1  -6   58.47    1.56
  -2  -1  -6   58.61    0.99
  -2  -1  -6   60.58    1.52
  -2   1  -6   57.14    1.49
  -2   1  -6   56.96    1.55
  -3  -1  -6    0.12    0.22
  -3  -1  -6    0.61    0.26
  -3  -1  -6    0.54    0.11
  -3  -1  -6    0.55    0.11
  -3   1  -6    0.28    0.24
  -3   1  -6    0.15    0.20
  -4  -1  -6   -0.39    0.18
  -4  -1  -6    0.05    0.10
  -4  -1  -6   -0.10    0.21
  -4   1  -6    0.08    0.21
  -4   1  -6   -0.09    0.21
  -5  -1  -6    1.37    0.19
  -5  -1  -6    1.55    0.38
  -5  -1  -6    1.56    0.43
  -5   1  -6    1.34    0.39
  -5   1  -6    1.73    0.42
  -6  -1  -6    7.25    0.78
  -6  -1  -6    4.95    0.62
  -6   1  -6    7.10    0.76
  -6   1  -6    7.35    0.81
  -7  -1  -6    0.08    0.28
  -7   1  -6    0.10    0.29
  -7   1  -6    0.21    0.28
  -8  -1  -6    3.31    0.58
  -8   1  -6    5.36    0.77
  -8   1  -6    3.30    0.61
  -9  -1  -6    3.65    0.66
  -9   1  -6    2.38    0.56
 -11  -2   6    3.59    0.75
 -11   2   6    2.02    0.61
  11   2  -6    2.33    0.65
 -10  -2   6   10.55    1.15
  10  -2  -6    9.33    1.04
  10   2  -6   10.00    1.11
 -10   2   6   10.78    1.12
   9  -2  -6   34.11    1.58
  -9  -2   6   32.54    1.53
  -9   2   6   33.53    1.54
   9   2  -6   33.75    1.58
  -8  -2   6   25.48    1.29
   8  -2  -6   26.40    1.31
   8   2  -6   25.61    1.31
  -8   2   6   27.28    1.32
   7  -2  -6    4.47    0.68
  -7  -2   6    3.68    0.58
   7   2  -6    3.67    0.60
  -7   2   6    3.40    0.56
  -6  -2   6    5.77    0.65
   6  -2  -6    6.68    0.72
   6   2  -6    5.78    0.67
  -6   2   6    5.97    0.67
  -5  -2   6    1.64    0.36
   5  -2  -6    0.99    0.35
   5   2  -6    1.30    0.12
   5   2  -6    1.24    0.24
   5   2  -6    1.45    0.35
  -5   2   6    1.35    0.35
  -4  -2   6    4.64    0.50
   4  -2  -6    5.05    0.54
   4   2  -6    5.12    0.54
   4   2  -6    4.68    0.24
  -4   2   6    4.32    0.49
   4   2  -6    5.19    0.38
  -3  -2   6    4.41    0.45
   3  -2  -6    4.06    0.43
   3   2  -6    4.08    0.44
  -3   2   6    4.52    0.46
   3   2  -6    4.07    0.39
   3   2  -6    4.36    0.28
   2  -2  -6   63.20    1.45
  -2  -2   6   61.11    1.38
  -2   2   6   60.45    1.43
   2   2  -6   63.72    1.42
   2   2  -6   64.19    1.25
   2   2  -6   63.89    1.43
   1  -2  -6  296.08    4.45
  -1  -2   6  300.28    4.35
   1  -2  -6  301.41    4.74
   1   2  -6  303.91    4.38
   1   2  -6  299.27    4.37
  -1   2   6  290.74    4.42
   1   2  -6  302.42    4.63
   0  -2  -6    3.96    0.45
   0  -2  -6    3.83    0.31
   0   2   6    3.76    0.29
   0   2  -6    4.33    0.28
   0   2  -6    4.28    0.41
   0   2  -6    3.63    0.41
  -1  -2  -6    5.16    0.32
  -1  -2  -6    5.25    0.51
  -1   2  -6    6.04    0.47
  -1   2  -6    5.99    0.46
  -1   2  -6    5.72    0.22
  -2  -2  -6   10.94    0.42
  -2  -2  -6   11.00    0.64
  -2  -2  -6   10.73    0.65
  -2   2  -6   10.10    0.65
  -2   2  -6   11.42    0.65
  -3  -2  -6   15.00    0.79
  -3  -2  -6   13.67    0.74
  -3  -2  -6   14.79    0.48
  -3   2  -6   13.24    0.77
  -3   2  -6   14.37    0.77
  -4  -2  -6   18.51    0.91
  -4  -2  -6   20.04    0.58
  -4   2  -6   18.61    0.92
  -4   2  -6   17.56    0.93
  -5  -2  -6    7.24    0.73
  -5  -2  -6    6.88    0.39
  -5   2  -6    5.90    0.65
  -5   2  -6    6.23    0.74
  -6  -2  -6    1.52    0.40
  -6  -2  -6    1.74    0.27
  -6   2  -6    1.23    0.40
  -6   2  -6    1.23    0.41
  -7  -2  -6   22.61    1.15
  -7   2  -6   22.97    1.22
  -7   2  -6   22.96    1.22
  -8  -2  -6    1.14    0.39
  -8   2  -6    1.60    0.50
  -8   2  -6    1.00    0.43
  -9   2  -6    0.70    0.49
 -11  -3   6    4.29    0.82
  11   3  -6    3.93    0.81
 -11   3   6    4.22    0.80
 -10  -3   6    0.71    0.39
  10  -3  -6    0.39    0.46
  10   3  -6    0.51    0.44
 -10   3   6    0.50    0.44
  -9  -3   6    0.99    0.46
   9  -3  -6    2.09    0.56
  -9   3   6    1.27    0.49
   9   3  -6    0.56    0.45
   8  -3  -6    2.33    0.55
  -8  -3   6    1.19    0.41
  -8   3   6    1.37    0.45
   8   3  -6    1.03    0.40
  -7  -3   6    0.93    0.34
   7  -3  -6    1.71    0.43
   7   3  -6    0.55    0.35
  -7   3   6    0.98    0.38
   6  -3  -6    7.02    0.72
  -6  -3   6    4.31    0.59
   6   3  -6    5.39    0.68
  -6   3   6    5.51    0.64
  -5  -3   6   16.94    0.88
   5  -3  -6   16.08    0.86
   5   3  -6   18.34    0.93
  -5   3   6   17.52    0.87
   5   3  -6   17.03    0.61
  -4  -3   6    7.40    0.56
   4  -3  -6    6.66    0.54
   4   3  -6    6.36    0.60
  -4   3   6    5.91    0.56
   4   3  -6    6.68    0.40
   3  -3  -6    3.05    0.39
  -3  -3   6    2.59    0.36
   3   3  -6    2.30    0.38
  -3   3   6    2.07    0.35
   3   3  -6    2.91    0.31
  -2  -3   6    9.19    0.50
   2  -3  -6    8.94    0.52
  -2   3   6    9.11    0.53
   2   3  -6    8.97    0.49
   2   3  -6    8.22    0.43
   2   3  -6    8.66    0.50
  -1  -3   6   13.28    0.54
   1  -3  -6   13.38    0.68
   1  -3  -6   13.15    0.60
   1   3  -6   14.39    0.64
   1   3  -6   13.36    0.54
   1   3  -6   13.52    0.58
  -1   3   6   13.87    0.59
   0  -3  -6   22.89    0.74
   0  -3  -6   24.31    0.93
   0   3  -6   24.64    0.66
   0   3  -6   23.94    0.87
   0   3  -6   23.35    0.81
   0   3   6   22.74    0.72
  -1  -3  -6    0.15    0.18
  -1  -3  -6    0.40    0.19
   1   3   6    0.26    0.15
  -1   3  -6    0.01    0.20
  -1   3  -6    0.03    0.10
  -1   3  -6   -0.21    0.16
  -2  -3  -6    3.82    0.34
  -2  -3  -6    4.13    0.50
  -2   3  -6    3.78    0.47
   2   3   6    4.00    0.38
  -2   3  -6    3.63    0.46
  -3  -3  -6    0.03    0.15
  -3  -3  -6   -0.22    0.17
  -3   3  -6    0.06    0.22
  -3   3  -6   -0.24    0.17
  -4  -3  -6    0.16    0.21
  -4  -3  -6    0.78    0.21
  -4   3  -6    1.05    0.31
  -4   3  -6    0.20    0.25
  -5  -3  -6    0.58    0.20
  -5  -3  -6    0.18    0.22
  -5   3  -6    0.21    0.28
  -5   3  -6    0.28    0.25
  -6  -3  -6   12.77    0.84
  -6  -3  -6   12.20    0.59
  -6   3  -6   14.19    0.95
  -6   3  -6   11.33    0.83
  -7  -3  -6   23.68    0.85
  -7  -3  -6   21.54    1.13
  -7   3  -6   22.87    1.21
  -7   3  -6   22.64    1.24
  -8  -3  -6    1.88    0.46
  -8   3  -6    1.69    0.51
  -8   3  -6    1.65    0.50
  -9   3  -6   23.11    1.36
 -11  -4   6   12.64    1.32
 -11   4   6   10.95    1.19
  11   4  -6   12.42    1.32
  10  -4  -6   10.40    1.12
 -10  -4   6   12.00    1.22
  10   4  -6    8.72    1.06
 -10   4   6    9.71    1.08
  -9  -4   6   20.98    1.27
   9  -4  -6   17.73    1.16
   9   4  -6   20.52    1.28
  -9   4   6   19.70    1.20
  -8  -4   6    8.93    0.95
   8  -4  -6    6.87    0.80
   8   4  -6    7.42    0.87
  -8   4   6    7.29    0.83
   7  -4  -6    6.09    0.71
  -7  -4   6    8.21    0.86
   7   4  -6    9.45    0.90
  -7   4   6    6.62    0.74
   6  -4  -6   -0.06    0.28
  -6  -4   6    0.47    0.30
  -6   4   6    0.43    0.30
   6   4  -6    0.12    0.31
  -5  -4   6   17.70    0.91
   5  -4  -6   18.46    0.95
   5   4  -6   17.76    0.58
  -5   4   6   18.33    0.93
   5   4  -6   18.17    0.95
  -4  -4   6   11.99    0.69
   4  -4  -6   12.91    0.76
  -4   4   6   12.76    0.73
   4   4  -6   13.20    0.52
   4   4  -6   11.93    0.71
  -3  -4   6    1.56    0.30
   3  -4  -6    2.18    0.36
   3   4  -6    1.53    0.24
   3   4  -6    1.85    0.32
  -3   4   6    1.93    0.32
  -2  -4   6    5.31    0.42
   2  -4  -6    7.45    0.51
   2   4  -6    6.43    0.42
  -2   4   6    6.72    0.48
   2   4  -6    6.00    0.48
   1  -4  -6    1.62    0.30
  -1  -4   6    2.07    0.27
   1   4  -6    1.56    0.28
   1   4  -6    2.22    0.32
   1   4  -6    1.93    0.29
  -1   4   6    1.42    0.27
   0  -4   6   15.01    0.53
   0  -4  -6   14.39    0.72
   0  -4  -6   14.98    0.66
   0   4  -6   14.13    0.54
   0   4  -6   14.94    0.69
   0   4   6   14.07    0.61
   0   4  -6   14.66    0.70
  -1  -4  -6    8.56    0.58
  -1  -4  -6    9.53    0.51
   1   4   6    8.59    0.47
  -1   4  -6    9.42    0.38
  -1   4  -6    9.52    0.62
  -1   4  -6    8.72    0.57
  -2  -4  -6    7.96    0.57
  -2  -4  -6    8.17    0.47
  -2   4  -6    8.21    0.27
  -2   4  -6    8.09    0.60
   2   4   6    8.07    0.44
  -2   4  -6    7.47    0.56
  -2   4  -6    7.80    0.25
  -3  -4  -6    0.08    0.16
  -3  -4  -6   -0.03    0.22
  -3   4  -6    0.05    0.21
  -3   4  -6   -0.17    0.22
  -4  -4  -6    1.28    0.27
  -4  -4  -6    0.95    0.31
  -4   4  -6    0.63    0.29
  -4   4  -6    0.17    0.25
  -5  -4  -6   40.89    1.13
  -5  -4  -6   40.34    1.39
  -5   4  -6   40.70    1.50
  -5   4  -6   40.41    1.53
  -6  -4  -6    8.11    0.54
  -6  -4  -6    9.07    0.71
  -6   4  -6    6.96    0.79
  -6   4  -6    7.24    0.78
  -7  -4  -6    3.09    0.43
  -7  -4  -6    4.92    0.65
  -7   4  -6    2.83    0.59
  -7   4  -6    3.56    0.62
  -8   4  -6    0.92    0.43
  -9   4  -6    0.17    0.37
 -11  -5   6    8.28    1.08
  11   5  -6    9.14    1.15
 -11   5   6    9.56    1.14
  10  -5  -6   -0.26    0.38
 -10  -5   6    0.28    0.45
 -10   5   6    0.45    0.44
  10   5  -6    0.32    0.46
   9  -5  -6    1.56    0.56
  -9  -5   6    2.19    0.59
  -9   5   6    1.50    0.50
   9   5  -6    1.36    0.55
  -8  -5   6    7.86    0.90
   8  -5  -6    8.32    0.94
  -8   5   6    5.65    0.79
   8   5  -6    8.01    0.94
  -7  -5   6   -0.05    0.25
   7  -5  -6    0.47    0.37
   7   5  -6    0.06    0.31
  -7   5   6    0.11    0.28
   6  -5  -6    1.72    0.44
  -6  -5   6    1.72    0.46
   6   5  -6    1.46    0.45
  -6   5   6    1.28    0.39
   5  -5  -6   17.46    0.93
  -5  -5   6   18.82    0.96
   5   5  -6   19.21    1.00
  -5   5   6   18.28    0.95
   4  -5  -6    0.81    0.31
  -4  -5   6    1.65    0.37
  -4   5   6    0.85    0.30
   4   5  -6    1.05    0.36
   4   5  -6    1.60    0.22
   3  -5  -6    6.16    0.61
  -3  -5   6    5.76    0.56
  -3   5   6    5.19    0.55
   3   5  -6    4.78    0.50
   3   5  -6    5.65    0.38
   2  -5  -6    9.60    0.62
  -2  -5   6   11.24    0.60
   2   5  -6   11.34    0.63
  -2   5   6   11.74    0.65
   2   5  -6   12.04    0.56
   1  -5  -6    1.59    0.32
  -1  -5   6    2.49    0.32
  -1   5   6    1.87    0.33
   1   5  -6    1.32    0.25
   1   5  -6    1.57    0.28
   0  -5  -6   12.84    0.71
   0  -5   6   12.43    0.53
   0  -5  -6   13.67    0.67
   0   5  -6   13.29    0.56
   0   5  -6   13.31    0.67
   0   5   6   13.60    0.63
   0   5  -6   12.52    0.66
  -1  -5  -6   17.83    0.74
  -1   5  -6   18.32    0.59
  -1   5  -6   17.93    0.82
   1   5   6   16.50    0.69
  -1   5  -6   19.52    0.87
  -2  -5  -6    1.67    0.30
  -2  -5  -6    2.04    0.39
  -2   5  -6    1.36    0.18
  -2   5  -6    0.93    0.29
  -2   5  -6    1.13    0.32
   2   5   6    2.28    0.32
  -3  -5  -6   13.68    0.65
  -3  -5  -6   12.00    0.73
  -3   5  -6   12.69    0.80
  -3   5  -6   12.97    0.36
  -3   5  -6   12.19    0.77
  -4  -5  -6    4.19    0.45
  -4  -5  -6    4.92    0.57
  -4   5  -6    4.67    0.59
  -4   5  -6    5.94    0.69
  -5  -5  -6    0.47    0.24
  -5  -5  -6    0.57    0.28
  -5   5  -6    0.68    0.32
  -5   5  -6    0.70    0.34
  -6  -5  -6    4.63    0.50
  -6  -5  -6    3.95    0.58
  -6   5  -6    4.44    0.65
  -6   5  -6    4.54    0.64
  -7  -5  -6    1.86    0.48
  -7  -5  -6    1.55    0.36
  -7   5  -6    1.41    0.50
  -7   5  -6    1.32    0.46
  -8  -5  -6    6.87    0.67
  -8   5  -6    6.09    0.85
  -9   5  -6    4.14    0.77
 -11  -6   6    1.23    0.54
  11   6  -6    0.21    0.46
 -11   6   6    1.58    0.59
 -10  -6   6    1.90    0.59
  10  -6  -6    1.60    0.57
  10   6  -6    1.31    0.55
 -10   6   6    1.50    0.53
  -9  -6   6    9.58    1.06
   9  -6  -6    5.43    0.81
   9   6  -6    6.43    0.91
  -9   6   6    5.37    0.82
   8  -6  -6    1.19    0.43
  -8  -6   6    1.68    0.47
  -8   6   6    0.86    0.38
   8   6  -6    0.94    0.44
  -7  -6   6    5.71    0.73
   7  -6  -6    4.21    0.64
  -7   6   6    4.30    0.65
   7   6  -6    5.29    0.71
   6  -6  -6    0.65    0.37
  -6  -6   6    0.93    0.38
   6   6  -6    2.07    0.50
   5  -6  -6   12.27    0.81
  -5  -6   6   12.03    0.82
  -5   6   6   10.74    0.76
   5   6  -6   12.16    0.85
  -4  -6   6    6.79    0.67
   4  -6  -6    6.58    0.68
  -4   6   6    6.78    0.66
   4   6  -6    7.23    0.72
  -3  -6   6   18.41    0.84
   3  -6  -6   17.84    0.87
   3   6  -6   16.18    0.60
   3   6  -6   16.49    0.85
  -3   6   6   15.56    0.82
   2  -6  -6   31.65    1.12
  -2  -6   6   27.15    0.97
  -2   6   6   26.64    1.01
   2   6  -6   27.08    0.87
   2   6  -6   28.22    1.02
  -1  -6   6    5.14    0.48
   1  -6  -6    4.39    0.48
   1   6  -6    4.70    0.48
  -1   6   6    4.80    0.50
   1   6  -6    5.12    0.47
   0  -6  -6   26.82    1.05
   0  -6  -6   25.99    0.97
   0  -6   6   25.34    0.82
   0   6  -6   24.36    0.93
   0   6  -6   26.56    0.86
   0   6   6   26.62    0.95
  -1  -6  -6    0.89    0.28
  -1  -6  -6    0.96    0.31
   1   6   6    0.83    0.26
  -1   6  -6    1.21    0.31
  -1   6  -6    0.94    0.22
  -1   6  -6    0.86    0.29
  -2  -6  -6   -0.15    0.20
  -2  -6  -6    0.39    0.25
  -2   6  -6    0.46    0.25
  -2   6  -6    0.35    0.25
  -2   6  -6    0.40    0.17
   2   6   6    0.17    0.21
  -3  -6  -6    0.09    0.22
  -3  -6  -6    0.53    0.27
  -3   6  -6    0.41    0.15
  -3   6  -6    0.72    0.31
  -3   6  -6    0.30    0.25
  -4  -6  -6   17.78    0.82
  -4  -6  -6   18.14    0.91
  -4   6  -6   20.34    1.06
  -4   6  -6   17.41    0.99
  -5  -6  -6   21.60    0.92
  -5  -6  -6   20.42    0.99
  -5   6  -6   21.29    1.11
  -5   6  -6   23.20    1.20
  -6  -6  -6    4.79    0.61
  -6  -6  -6    4.67    0.55
  -6   6  -6    5.49    0.75
  -6   6  -6    6.21    0.79
  -7  -6  -6    0.91    0.33
  -7   6  -6    0.93    0.42
  -8  -6  -6    0.24    0.27
  -8   6  -6   -0.20    0.32
  -9   6  -6    0.23    0.42
 -10  -7   6    7.32    1.01
 -10   7   6    7.66    0.98
  10   7  -6    8.25    1.04
  -9  -7   6    1.09    0.48
   9  -7  -6    1.10    0.55
   9   7  -6    0.51    0.45
  -9   7   6    1.20    0.50
   8  -7  -6    0.87    0.46
  -8  -7   6    0.08    0.30
  -8   7   6    0.14    0.36
   8   7  -6   -0.28    0.33
  -7  -7   6   -0.23    0.26
   7  -7  -6    0.36    0.39
   7   7  -6    0.21    0.34
  -7   7   6    0.25    0.35
   6  -7  -6    2.83    0.56
  -6  -7   6    1.03    0.37
   6   7  -6    2.39    0.52
  -6   7   6    1.88    0.46
   5  -7  -6   10.25    0.93
  -5  -7   6    9.00    0.84
   5   7  -6    8.20    0.83
  -5   7   6    8.87    0.85
   4  -7  -6    2.14    0.44
  -4  -7   6    2.39    0.44
  -4   7   6    1.81    0.40
   4   7  -6    2.60    0.50
   3  -7  -6    3.20    0.51
  -3  -7   6    3.41    0.50
  -3   7   6    2.22    0.43
   3   7  -6    3.16    0.50
   3   7  -6    2.28    0.27
   2  -7  -6   -0.04    0.22
  -2  -7   6    0.05    0.19
   2   7  -6    0.23    0.17
   2   7  -6    0.05    0.25
  -2   7   6    0.11    0.20
   1  -7  -6   17.15    0.86
  -1  -7   6   16.33    0.76
   1   7  -6   16.65    0.73
   1   7  -6   16.44    0.79
  -1   7   6   17.18    0.83
   0  -7  -6    7.16    0.65
   0  -7   6    6.96    0.48
   0   7  -6    7.47    0.53
   0   7  -6    7.96    0.56
   0   7   6    7.57    0.57
  -1  -7  -6   28.95    1.13
  -1  -7  -6   30.26    1.11
   1   7   6   28.08    1.04
  -1   7  -6   31.68    1.16
  -1   7  -6   29.84    1.15
  -1   7  -6   30.76    0.94
  -2  -7  -6    0.83    0.30
  -2  -7  -6    0.67    0.26
  -2   7  -6    0.86    0.23
   2   7   6    0.45    0.25
  -2   7  -6    1.02    0.35
  -2   7  -6    0.81    0.30
  -3  -7  -6    8.18    0.63
  -3  -7  -6    6.62    0.61
  -3   7  -6    6.74    0.71
  -3   7  -6    6.18    0.70
  -3   7  -6    6.69    0.40
  -4  -7  -6   14.10    0.79
  -4  -7  -6   13.67    0.81
  -4   7  -6   14.15    0.92
  -4   7  -6   15.21    0.55
  -4   7  -6   16.12    0.99
  -5  -7  -6    4.51    0.58
  -5  -7  -6    4.20    0.53
  -5   7  -6    3.12    0.57
  -5   7  -6    3.64    0.59
  -6  -7  -6    5.51    0.62
  -6   7  -6    4.19    0.71
  -7  -7  -6    1.30    0.39
  -7   7  -6    0.78    0.41
  -8  -7  -6    7.61    0.78
  -8   7  -6    7.86    0.96
  -9   7  -6    0.13    0.40
 -10  -8   6    0.43    0.44
  10   8  -6    1.44    0.61
 -10   8   6    1.03    0.52
   9  -8  -6    9.14    1.08
  -9  -8   6    8.95    1.10
   9   8  -6    8.26    1.08
  -9   8   6    8.13    1.02
   8  -8  -6    3.69    0.70
  -8  -8   6    3.03    0.65
   8   8  -6    2.54    0.62
  -8   8   6    3.99    0.71
  -7  -8   6    4.80    0.78
   7  -8  -6    5.18    0.72
   7   8  -6    3.54    0.70
   6  -8  -6   45.74    1.70
  -6  -8   6   45.07    1.68
   6   8  -6   44.60    1.72
  -6   8   6   45.56    1.71
   5  -8  -6    1.91    0.46
  -5  -8   6    3.37    0.57
   5   8  -6    3.50    0.60
  -5   8   6    2.09    0.47
   4  -8  -6   14.50    0.92
  -4  -8   6   13.34    0.85
  -4   8   6   14.28    0.91
   4   8  -6   14.42    0.93
   3  -8  -6   33.92    1.32
  -3  -8   6   32.30    1.21
   3   8  -6   32.03    0.93
  -3   8   6   33.53    1.29
   3   8  -6   31.56    1.24
  -2  -8   6    3.67    0.51
   2  -8  -6    3.63    0.53
   2   8  -6    2.81    0.48
  -2   8   6    3.80    0.54
   2   8  -6    2.55    0.33
   1  -8  -6    2.90    0.46
  -1  -8   6    2.25    0.38
  -1   8   6    2.02    0.38
   1   8  -6    2.60    0.41
   1   8  -6    2.42    0.36
   0  -8   6    1.14    0.29
   0  -8  -6    1.53    0.40
   0   8  -6    0.84    0.27
   0   8  -6    1.02    0.30
  -1  -8  -6    7.97    0.65
  -1  -8  -6    8.88    0.68
  -1   8  -6    8.33    0.65
  -1   8  -6    9.94    0.60
   1   8   6    9.81    0.67
  -2  -8  -6   17.88    0.91
  -2  -8  -6   18.60    0.91
  -2   8  -6   16.98    0.95
  -2   8  -6   16.26    0.91
   2   8   6   16.38    0.85
  -2   8  -6   16.90    0.71
  -3  -8  -6    0.03    0.24
  -3  -8  -6   -0.03    0.21
  -3   8  -6    0.08    0.28
  -3   8  -6    0.39    0.20
  -3   8  -6    0.71    0.34
  -4  -8  -6    3.02    0.49
  -4  -8  -6    2.69    0.47
  -4   8  -6    2.99    0.34
  -4   8  -6    3.83    0.60
  -4   8  -6    3.30    0.59
  -5  -8  -6    1.27    0.38
  -5  -8  -6    1.96    0.40
  -5   8  -6    2.55    0.55
  -6  -8  -6    0.39    0.33
  -6   8  -6    0.88    0.45
  -7  -8  -6    1.26    0.42
  -7   8  -6    0.81    0.45
  -8  -8  -6    9.05    0.88
  -8   8  -6    7.14    0.96
 -10  -9   6   -0.02    0.39
 -10   9   6    0.65    0.51
  10   9  -6    0.10    0.51
   9  -9  -6    2.73    0.68
  -9  -9   6    3.07    0.68
  -9   9   6    2.56    0.62
   9   9  -6    2.51    0.68
   8  -9  -6    0.01    0.34
  -8  -9   6    0.46    0.45
   8   9  -6    0.34    0.46
  -8   9   6    0.58    0.39
  -7  -9   6    8.28    0.96
   7  -9  -6   11.11    1.08
   7   9  -6   11.59    1.17
  -7   9   6    8.44    0.97
   6  -9  -6    0.73    0.39
  -6  -9   6    0.81    0.41
  -6   9   6    0.25    0.31
   6   9  -6    0.29    0.41
  -5  -9   6    4.51    0.66
   5  -9  -6    3.33    0.61
   5   9  -6    4.29    0.68
  -5   9   6    3.86    0.63
  -4  -9   6   17.39    0.99
   4  -9  -6   16.10    1.01
   4   9  -6   15.25    0.99
  -4   9   6   17.36    1.02
   3  -9  -6    6.56    0.74
  -3  -9   6    6.08    0.69
   3   9  -6    5.94    0.70
  -3   9   6    5.02    0.64
  -2  -9   6    1.45    0.34
   2  -9  -6    2.59    0.48
   2   9  -6    1.73    0.44
  -2   9   6    1.88    0.42
   1  -9  -6    8.98    0.71
  -1  -9   6   10.79    0.69
   1   9  -6    9.26    0.70
  -1   9   6   10.62    0.76
   0  -9  -6    4.03    0.58
   0   9  -6    5.02    0.55
   0   9   6    4.47    0.57
   0   9  -6    3.91    0.49
  -1  -9  -6   11.59    0.79
  -1  -9  -6   10.54    0.75
   1   9   6   10.14    0.73
  -1   9  -6   10.39    0.73
  -1   9  -6    9.53    0.63
  -2  -9  -6  155.68    3.16
  -2  -9  -6  147.97    3.13
   2   9   6  153.69    3.13
  -2   9  -6  152.68    3.27
  -2   9  -6  150.77    2.79
  -3  -9  -6    5.35    0.63
  -3  -9  -6    3.19    0.52
  -3   9  -6    3.75    0.43
  -3   9  -6    3.90    0.58
  -4  -9  -6    0.50    0.28
  -4  -9  -6    0.27    0.30
  -4   9  -6    0.42    0.30
  -4   9  -6    0.72    0.23
  -5  -9  -6    5.55    0.68
  -5   9  -6    3.97    0.65
  -6  -9  -6   10.45    0.84
  -6   9  -6    9.54    1.04
  -7  -9  -6    6.84    0.79
  -7   9  -6    7.51    0.95
  -8  -9  -6    0.96    0.43
  -8   9  -6    1.12    0.51
   9 -10  -6    2.92    0.75
  -9 -10   6    2.20    0.62
   9  10  -6    1.39    0.60
  -9  10   6    1.98    0.66
  -8 -10   6    1.51    0.52
   8 -10  -6    2.58    0.66
   8  10  -6    2.62    0.68
  -7 -10   6    4.71    0.79
   7 -10  -6    6.57    0.89
  -7  10   6    5.72    0.84
   7  10  -6    3.58    0.77
   6 -10  -6    8.27    0.93
  -6 -10   6    9.04    0.96
   6  10  -6    8.59    0.96
  -6  10   6    8.30    0.90
   5 -10  -6    0.05    0.31
  -5 -10   6    0.35    0.35
   5  10  -6    0.02    0.38
  -5  10   6   -0.25    0.25
   4 -10  -6    0.60    0.37
  -4 -10   6    1.65    0.46
  -4  10   6    1.54    0.44
   4  10  -6    1.94    0.52
   3 -10  -6    7.60    0.83
  -3 -10   6    7.80    0.78
  -3  10   6    8.74    0.84
   3  10  -6    7.25    0.78
  -2 -10   6   16.11    0.91
   2 -10  -6   16.18    1.01
  -2  10   6   16.48    0.99
   2  10  -6   15.89    0.95
  -1 -10   6    1.72    0.40
   1 -10  -6    1.27    0.44
  -1  10   6    2.01    0.49
   1  10  -6    1.81    0.43
   0 -10  -6   19.19    1.05
   0  10  -6   19.15    0.93
   0  10   6   19.59    1.04
  -1 -10  -6   48.99    1.66
  -1 -10  -6   47.75    1.61
  -1  10  -6   49.09    1.46
   1  10   6   53.21    1.68
  -2 -10  -6    7.95    0.77
  -2 -10  -6    8.13    0.82
   2  10   6    8.43    0.81
  -2  10  -6    8.28    0.63
  -3 -10  -6    2.42    0.49
  -3 -10  -6    1.51    0.38
  -3  10  -6    2.70    0.54
  -3  10  -6    2.66    0.41
  -4 -10  -6    0.82    0.34
  -4 -10  -6    0.43    0.36
  -4  10  -6    0.65    0.26
  -4  10  -6    0.54    0.38
  -5 -10  -6    6.83    0.78
  -5  10  -6    6.53    0.83
  -5  10  -6    7.08    0.59
  -6 -10  -6    2.40    0.53
  -6  10  -6    2.20    0.56
  -7 -10  -6    2.29    0.55
  -7  10  -6    2.82    0.67
  -9 -11   6   -0.22    0.35
   9  11  -6   -0.10    0.47
  -9  11   6    0.35    0.45
   8 -11  -6    4.85    0.86
  -8 -11   6    5.96    0.92
   8  11  -6    3.72    0.82
  -8  11   6    5.72    0.89
   7 -11  -6   12.90    1.24
  -7 -11   6   10.16    1.10
   7  11  -6   10.27    1.13
  -7  11   6   12.17    1.22
  -6 -11   6    3.38    0.70
   6 -11  -6    2.58    0.62
  -6  11   6    3.23    0.66
   6  11  -6    2.90    0.71
   5 -11  -6    3.85    0.68
  -5 -11   6    3.06    0.62
  -5  11   6    2.71    0.58
   5  11  -6    4.90    0.78
  -4 -11   6    0.57    0.36
   4 -11  -6    0.16    0.36
  -4  11   6    1.10    0.46
   4  11  -6    1.34    0.52
   3 -11  -6   33.13    1.49
  -3 -11   6   34.08    1.41
  -3  11   6   35.31    1.51
   3  11  -6   33.91    1.47
   2 -11  -6   12.12    0.94
  -2 -11   6   12.84    0.86
   2  11  -6   12.76    0.92
  -2  11   6   13.23    0.91
   1 -11  -6   10.90    0.88
  -1  11   6   10.85    0.85
   1  11  -6   11.85    0.85
   0 -11  -6   19.70    1.12
   0  11   6   19.47    1.09
   0  11  -6   20.10    1.01
  -1 -11  -6    2.12    0.46
  -1 -11  -6    2.85    0.55
  -1  11  -6    2.37    0.45
   1  11   6    1.58    0.42
  -2 -11  -6   -0.16    0.20
  -2 -11  -6    1.02    0.41
  -2  11  -6    0.49    0.28
   2  11   6    0.64    0.35
  -3 -11  -6    3.38    0.54
  -3 -11  -6    2.97    0.57
  -3  11  -6    3.35    0.63
  -3  11  -6    2.47    0.43
  -4 -11  -6    3.55    0.62
  -4  11  -6    2.63    0.56
  -4  11  -6    2.60    0.42
  -5 -11  -6   -0.32    0.30
  -5  11  -6    0.12    0.36
  -5  11  -6   -0.15    0.21
  -6 -11  -6    3.27    0.65
  -6  11  -6    2.80    0.67
  -7 -11  -6   22.01    1.30
  -7  11  -6   21.17    1.42
   8 -12  -6    2.08    0.63
  -8 -12   6    2.00    0.68
   8  12  -6    3.15    0.83
  -8  12   6    2.40    0.70
   7 -12  -6   17.63    1.29
  -7 -12   6   20.12    1.34
  -7  12   6   19.57    1.36
   7  12  -6   17.03    1.32
   6 -12  -6    2.17    0.65
  -6 -12   6    2.03    0.56
  -6  12   6    2.53    0.65
   6  12  -6    1.62    0.56
  -5 -12   6    1.34    0.49
   5 -12  -6    1.32    0.49
   5  12  -6    2.08    0.63
  -5  12   6    1.32    0.48
  -4 -12   6   18.25    1.11
   4 -12  -6   18.86    1.22
  -4  12   6   20.06    1.23
   4  12  -6   17.73    1.15
   3 -12  -6   -0.40    0.25
  -3 -12   6    0.45    0.35
   3  12  -6    0.49    0.41
  -3  12   6   -0.03    0.29
  -2 -12   6   18.93    1.08
   2 -12  -6   16.14    1.10
   2  12  -6   18.99    1.12
  -2  12   6   16.43    1.08
   1 -12  -6   22.33    1.21
  -1  12   6   19.44    1.12
   1  12  -6   20.44    1.10
   0 -12  -6   -0.02    0.34
   0  12  -6   -0.04    0.28
   0  12   6   -0.35    0.26
  -1 -12  -6   -0.32    0.30
   1  12   6    0.37    0.35
  -1  12  -6    0.50    0.33
  -2 -12  -6   -0.17    0.32
  -2 -12  -6    0.38    0.29
  -2  12  -6    0.79    0.34
   2  12   6    0.41    0.36
  -3 -12  -6    2.77    0.56
  -3 -12  -6    2.67    0.58
  -3  12  -6    2.31    0.52
  -3  12  -6    2.94    0.48
  -4 -12  -6    0.45    0.41
  -4  12  -6    0.48    0.31
  -4  12  -6    0.71    0.44
  -5 -12  -6    0.47    0.40
  -5  12  -6    0.01    0.24
  -5  12  -6   -0.25    0.32
  -6 -12  -6    0.79    0.47
  -6  12  -6    0.39    0.47
   7 -13  -6   11.60    1.30
  -7 -13   6    9.37    1.12
  -7  13   6   11.87    1.28
   7  13  -6    9.67    1.18
   6 -13  -6    2.09    0.66
  -6 -13   6    2.14    0.57
   6  13  -6    1.68    0.61
  -6  13   6    2.15    0.64
  -5 -13   6    2.43    0.59
   5 -13  -6    2.10    0.56
  -5  13   6    1.16    0.49
   5  13  -6    2.14    0.66
  -4 -13   6    4.88    0.75
   4 -13  -6    5.23    0.80
   4  13  -6    4.63    0.79
  -4  13   6    3.47    0.67
   3 -13  -6    0.56    0.39
  -3 -13   6    1.13    0.45
   3  13  -6    0.67    0.48
  -3  13   6    0.72    0.42
   2 -13  -6    3.61    0.69
  -2  13   6    3.89    0.70
   2  13  -6    4.24    0.70
   1 -13  -6    4.52    0.71
  -1  13   6    4.67    0.70
   1  13  -6    4.01    0.64
   0 -13  -6    8.98    0.95
   0  13  -6    7.75    0.82
   0  13   6    9.66    0.98
  -1 -13  -6   42.31    1.77
   1  13   6   45.87    1.77
  -1  13  -6   44.79    1.61
  -2 -13  -6   35.41    1.62
  -2 -13  -6   35.40    1.44
  -2  13  -6   38.77    1.45
   2  13   6   33.81    1.56
  -3 -13  -6    0.23    0.40
  -3  13  -6    0.06    0.29
  -3  13  -6    0.76    0.42
  -4 -13  -6    2.06    0.57
  -4  13  -6    1.84    0.45
  -4  13  -6    1.51    0.50
  -5 -13  -6    0.25    0.43
  -5  13  -6   -0.08    0.25
  -5  13  -6    0.19    0.41
  -6 -13  -6    0.23    0.41
  -6  13  -6    0.24    0.45
  -7 -14   6    0.21    0.43
   7 -14  -6    0.02    0.45
  -7  14   6   -0.37    0.38
   7  14  -6   -0.53    0.49
   6 -14  -6    5.44    0.92
  -6 -14   6    5.50    0.87
  -6  14   6    6.45    0.97
   6  14  -6    5.91    0.96
  -5 -14   6    1.44    0.53
   5 -14  -6    1.79    0.60
  -5  14   6    1.24    0.53
   5  14  -6    1.54    0.63
   4 -14  -6    4.44    0.75
  -4 -14   6    3.83    0.69
  -4  14   6    5.47    0.83
   4  14  -6    4.25    0.77
   3 -14  -6   -0.25    0.40
  -3 -14   6    0.26    0.36
  -3  14   6    0.58    0.45
   3  14  -6    0.60    0.45
   2 -14  -6    0.93    0.47
  -2  14   6    0.96    0.47
   2  14  -6    0.13    0.36
   1 -14  -6    6.76    0.92
   1  14  -6    8.24    0.92
  -1  14   6    8.67    1.00
   0 -14  -6   28.51    1.49
   0  14   6   28.95    1.47
   0  14  -6   27.95    1.40
  -1 -14  -6    0.40    0.47
  -1  14  -6   -0.06    0.32
   1  14   6   -0.12    0.31
  -2 -14  -6   13.42    1.24
  -2  14  -6   13.53    0.97
   2  14   6   12.46    1.21
  -3 -14  -6    4.29    0.75
  -3  14  -6    3.45    0.66
  -3  14  -6    4.27    0.64
  -4 -14  -6    0.13    0.39
  -4  14  -6   -0.01    0.30
  -4  14  -6    0.39    0.39
  -5 -14  -6    2.31    0.67
  -5  14  -6    1.55    0.43
  -5  14  -6    1.37    0.58
   6 -15  -6    8.48    1.14
  -6 -15   6    8.45    1.13
  -6  15   6    9.69    1.18
   6  15  -6    5.75    1.03
  -5 -15   6    7.90    1.02
   5 -15  -6    6.73    0.98
  -5  15   6    7.70    1.08
   5  15  -6    8.56    1.14
   4 -15  -6   -0.23    0.42
  -4 -15   6    0.05    0.44
   4  15  -6    0.53    0.52
  -4  15   6    0.41    0.45
   3 -15  -6    0.26    0.46
   3  15  -6    0.37    0.50
  -3  15   6    0.40    0.47
   2 -15  -6    5.46    0.93
  -2  15   6    5.75    0.91
   2  15  -6    3.51    0.70
   1 -15  -6    0.71    0.44
   1  15  -6    0.01    0.37
  -1  15   6    0.12    0.39
   0 -15  -6    5.42    0.89
   0  15   6    4.80    0.81
   0  15  -6    4.68    0.75
  -1 -15  -6    0.91    0.54
  -1  15  -6    1.10    0.47
   1  15   6    1.19    0.48
  -2 -15  -6    3.23    0.72
  -2  15  -6    2.86    0.61
  -3 -15  -6    6.99    1.02
  -3  15  -6    6.30    0.76
  -4 -15  -6    2.36    0.69
  -4  15  -6    1.45    0.48
  -4  15  -6    1.13    0.55
   4 -16  -6    2.16    0.72
   4  16  -6    1.90    0.69
  -4  16   6    2.31    0.72
   3 -16  -6    4.55    0.88
  -3  16   6    3.31    0.74
   3  16  -6    2.93    0.74
   2 -16  -6    0.89    0.56
  -2  16   6    0.62    0.54
   2  16  -6   -0.44    0.41
   1 -16  -6   -0.06    0.44
   1  16  -6   -0.35    0.38
  -1  16   6    0.30    0.45
   0 -16  -6   15.86    1.30
   0  16  -6   16.26    1.18
   0  16   6   16.89    1.29
  -1 -16  -6    2.70    0.74
   1  16   6    1.00    0.51
  -1  16  -6    0.88    0.49
  -2 -16  -6    0.83    0.61
  -2  16  -6    1.53    0.52
  -3 -16  -6    1.67    0.65
  -3  16  -6    1.68    0.51
   2 -17  -6    0.14    0.58
  -2  17   6    0.24    0.49
   2  17  -6    0.34    0.47
   1 -17  -6    0.03    0.51
   1  17  -6   -0.19    0.43
  -1  17   6    0.34    0.51
   0 -17  -6    2.59    0.76
   0  17  -6    2.21    0.64
   0  17   6    3.57    0.82
  11   0  -7   10.03    1.14
 -11   0   7   10.55    1.17
  10   0  -7   -0.03    0.37
 -10   0   7   -0.09    0.35
  -9   0   7   16.82    1.12
   9   0  -7   16.91    1.15
   8   0  -7    0.09    0.34
  -8   0   7   -0.10    0.25
  -7   0   7   10.58    0.84
   7   0  -7   10.58    0.87
  -6   0   7   -0.01    0.24
   6   0  -7    0.14    0.28
   5   0  -7    1.76    0.38
  -5   0   7    1.75    0.36
  -4   0   7   -0.14    0.19
   4   0  -7   -0.06    0.20
   4   0  -7    0.18    0.21
   3   0  -7  133.82    2.55
  -3   0   7  129.11    2.50
   3   0  -7  133.97    2.04
   3   0  -7  134.77    2.56
  -2   0   7    0.06    0.15
   2   0  -7   -0.44    0.15
   2   0  -7    0.29    0.18
   2   0  -7    0.14    0.15
  -1   0   7   21.83    0.71
   1   0  -7   23.41    0.90
   1   0  -7   22.89    0.76
   1   0  -7   21.85    0.73
   0   0  -7    0.02    0.14
   0   0  -7   -0.02    0.16
   0   0  -7    0.17    0.20
  -1   0  -7    2.64    0.22
  -1   0  -7    2.18    0.39
  -1   0  -7    2.98    0.41
  -2   0  -7    0.09    0.23
  -2   0  -7    0.07    0.19
  -3   0  -7   49.46    1.51
  -3   0  -7   47.03    1.52
  -4   0  -7   -0.06    0.25
  -4   0  -7    0.17    0.27
  -5   0  -7   14.24    0.91
  -5   0  -7   13.14    0.88
  -6   0  -7   -0.29    0.27
  -6   0  -7   -0.39    0.21
  -7   0  -7   12.81    0.96
  -7   0  -7   11.34    1.05
  -8   0  -7   -0.08    0.28
  -9   0  -7   44.85    1.88
  11  -1  -7    5.03    0.92
 -11  -1   7    4.54    0.86
  11   1  -7    5.37    0.89
 -11   1   7    3.67    0.80
  10  -1  -7    2.42    0.61
 -10  -1   7    2.26    0.59
 -10   1   7    1.48    0.51
  10   1  -7    2.37    0.63
  -9  -1   7    2.40    0.59
   9  -1  -7    5.24    0.83
  -9   1   7    3.68    0.69
   9   1  -7    3.93    0.75
   8  -1  -7   34.13    1.52
  -8  -1   7   35.34    1.53
   8   1  -7   31.53    1.49
  -8   1   7   32.81    1.46
   7  -1  -7   10.46    0.96
  -7  -1   7    8.25    0.83
  -7   1   7   10.38    0.82
   7   1  -7    7.32    0.81
  -6  -1   7    6.12    0.70
   6  -1  -7    6.27    0.70
  -6   1   7    5.90    0.66
   6   1  -7    5.27    0.67
  -5  -1   7    2.86    0.45
   5  -1  -7    3.34    0.51
   5   1  -7    4.26    0.57
   5   1  -7    2.77    0.38
  -5   1   7    2.33    0.42
   4  -1  -7   24.22    1.00
  -4  -1   7   23.70    0.96
  -4   1   7   23.27    0.97
   4   1  -7   24.19    0.87
   4   1  -7   23.37    0.98
   4   1  -7   22.95    0.52
   3  -1  -7    2.54    0.37
   3  -1  -7    2.34    0.38
  -3  -1   7    2.50    0.36
   3   1  -7    2.28    0.34
   3   1  -7    2.83    0.26
  -3   1   7    2.31    0.35
   3   1  -7    2.57    0.39
   2  -1  -7   23.85    0.93
   2  -1  -7   23.08    0.83
  -2  -1   7   23.50    0.79
   2   1  -7   22.50    0.82
  -2   1   7   23.99    0.82
   2   1  -7   21.08    0.84
   2   1  -7   23.64    0.71
  -1  -1   7   57.81    1.24
   1  -1  -7   58.71    1.54
   1  -1  -7   57.70    1.30
   1  -1  -7   59.24    1.31
  -1   1   7   57.07    1.27
   1   1  -7   60.06    1.29
   1   1  -7   57.19    1.50
   1   1  -7   57.96    1.32
   0  -1  -7    5.73    0.55
   0  -1  -7    6.79    0.48
   0  -1  -7    6.97    0.39
   0   1  -7    6.11    0.48
   0   1  -7    6.88    0.54
   0   1  -7    6.54    0.34
   0   1   7    6.77    0.36
  -1  -1  -7   45.69    1.40
  -1  -1  -7   47.78    0.95
  -1  -1  -7   46.50    1.30
  -1   1  -7   46.30    1.31
  -1   1  -7   45.53    1.39
  -1   1  -7   46.08    0.82
  -2  -1  -7    1.57    0.37
  -2  -1  -7    1.61    0.34
  -2  -1  -7    1.87    0.18
  -2   1  -7    1.81    0.38
  -2   1  -7    1.56    0.34
  -3  -1  -7   10.22    0.68
  -3  -1  -7    9.79    0.69
  -3   1  -7   10.73    0.72
  -3   1  -7   11.40    0.76
  -4  -1  -7    7.92    0.80
  -4  -1  -7    7.55    0.73
  -4   1  -7    6.76    0.71
  -4   1  -7    5.54    0.65
  -5  -1  -7    0.54    0.33
  -5  -1  -7    0.44    0.30
  -5   1  -7    0.03    0.24
  -5   1  -7    0.48    0.31
  -6  -1  -7    3.09    0.56
  -6  -1  -7    3.08    0.56
  -6   1  -7    3.16    0.57
  -6   1  -7    3.03    0.55
  -7  -1  -7    3.22    0.62
  -7   1  -7    5.96    0.79
  -7   1  -7    5.54    0.75
  -8  -1  -7   -0.25    0.28
  -8   1  -7    0.49    0.41
  -8   1  -7   -0.01    0.30
  -9  -1  -7    2.85    0.64
  -9   1  -7    2.23    0.57
 -11  -2   7    4.82    0.82
  11  -2  -7    6.68    1.00
  11   2  -7    3.83    0.77
 -11   2   7    5.30    0.93
 -10  -2   7    2.65    0.61
  10  -2  -7    1.98    0.61
  10   2  -7    1.92    0.59
 -10   2   7    1.97    0.59
  -9  -2   7    4.13    0.70
   9  -2  -7    3.26    0.65
  -9   2   7    3.20    0.63
   9   2  -7    3.30    0.67
   8  -2  -7    0.35    0.36
  -8  -2   7   -0.27    0.24
  -8   2   7   -0.07    0.28
   8   2  -7   -0.15    0.31
  -7  -2   7   12.20    0.87
   7  -2  -7    9.33    0.89
  -7   2   7   11.46    0.84
   7   2  -7   10.93    0.86
  -6  -2   7    1.94    0.42
   6  -2  -7    2.08    0.48
  -6   2   7    2.26    0.49
   6   2  -7    2.45    0.48
   6   2  -7    2.40    0.35
   5  -2  -7   28.13    1.15
  -5  -2   7   25.83    1.09
   5   2  -7   28.84    0.93
  -5   2   7   26.22    1.10
   5   2  -7   29.52    1.18
   4  -2  -7    1.55    0.35
  -4  -2   7    1.88    0.36
   4   2  -7    1.27    0.27
  -4   2   7    1.49    0.35
   4   2  -7    2.06    0.21
   4   2  -7    1.05    0.30
  -3  -2   7    0.72    0.24
   3  -2  -7    1.12    0.29
   3   2  -7    0.70    0.17
   3   2  -7    0.62    0.21
   3   2  -7    0.35    0.21
  -3   2   7    0.76    0.27
  -2  -2   7   74.26    1.59
   2  -2  -7   76.00    1.82
   2  -2  -7   73.08    1.65
   2   2  -7   70.27    1.44
   2   2  -7   71.83    1.66
   2   2  -7   71.97    1.59
  -1  -2   7   50.85    1.16
   1  -2  -7   50.67    1.45
   1  -2  -7   51.80    1.26
  -1   2   7   51.85    1.23
   1   2  -7   52.52    1.19
   1   2  -7   50.36    1.24
   1   2  -7   50.92    1.38
   0  -2  -7   10.76    0.50
   0  -2  -7   11.33    0.67
   0   2  -7   11.73    0.66
   0   2  -7   12.05    0.62
   0   2  -7   11.02    0.44
   0   2   7   11.04    0.49
  -1  -2  -7    3.46    0.42
  -1  -2  -7    3.04    0.43
  -1  -2  -7    3.56    0.31
  -1   2  -7    3.32    0.20
  -1   2  -7    2.49    0.37
  -1   2  -7    3.03    0.42
  -2  -2  -7   26.46    1.03
  -2  -2  -7   26.14    0.67
  -2  -2  -7   27.75    1.11
  -2   2  -7   28.04    1.06
  -2   2  -7   24.42    1.04
  -3  -2  -7    0.05    0.11
  -3  -2  -7    0.39    0.27
  -3  -2  -7    0.15    0.22
  -3   2  -7   -0.06    0.20
  -3   2  -7   -0.01    0.21
  -4  -2  -7   23.69    0.60
  -4  -2  -7   23.17    1.09
  -4   2  -7   23.80    1.14
  -4   2  -7   23.19    1.07
  -5  -2  -7    4.32    0.60
  -5   2  -7    4.52    0.65
  -5   2  -7    2.93    0.54
  -6  -2  -7    3.90    0.62
  -6   2  -7    2.35    0.49
  -6   2  -7    2.49    0.55
  -7  -2  -7    0.11    0.29
  -7   2  -7    0.59    0.33
  -7   2  -7    0.16    0.34
  -8  -2  -7   10.57    1.01
  -8   2  -7   11.30    1.12
  -8   2  -7   10.49    1.09
  -9   2  -7    4.18    0.78
  -9   2  -7    3.66    0.75
 -11  -3   7    2.53    0.69
  11  -3  -7    1.47    0.61
 -11   3   7    2.16    0.66
  11   3  -7    1.24    0.61
  10  -3  -7    3.94    0.73
 -10  -3   7    2.76    0.66
 -10   3   7    2.73    0.61
  10   3  -7    1.75    0.60
  -9  -3   7    8.25    0.95
   9  -3  -7   12.29    1.17
   9   3  -7    9.40    1.01
  -9   3   7    9.71    1.04
  -8  -3   7    0.28    0.33
   8  -3  -7   -0.13    0.36
   8   3  -7   -0.14    0.36
  -8   3   7    0.19    0.34
   7  -3  -7   -0.38    0.30
  -7  -3   7    0.28    0.30
  -7   3   7   -0.05    0.26
   7   3  -7    0.37    0.38
   6  -3  -7    0.82    0.39
  -6  -3   7    1.16    0.40
   6   3  -7    1.14    0.42
  -6   3   7    0.50    0.34
   5  -3  -7   87.05    2.17
  -5  -3   7   86.99    2.15
   5   3  -7   86.15    2.18
   5   3  -7   84.10    1.50
  -5   3   7   86.17    2.15
   5   3  -7   85.95    1.75
   4  -3  -7    0.09    0.24
  -4  -3   7    0.26    0.24
   4   3  -7    0.22    0.17
  -4   3   7   -0.01    0.23
   4   3  -7    0.81    0.31
   4   3  -7    0.47    0.15
   3  -3  -7    0.13    0.19
  -3  -3   7    0.22    0.20
   3   3  -7    0.29    0.19
  -3   3   7    0.03    0.18
   3   3  -7   -0.08    0.13
   3   3  -7    0.12    0.22
  -2  -3   7   33.00    0.99
   2  -3  -7   33.91    1.06
   2  -3  -7   31.48    1.15
  -2   3   7   31.90    1.03
   2   3  -7   32.43    0.91
   2   3  -7   30.87    1.01
   2   3  -7   33.02    1.01
   1  -3  -7    9.81    0.55
   1  -3  -7    9.09    0.61
  -1  -3   7   10.91    0.50
  -1   3   7    8.86    0.51
   1   3  -7   10.28    0.56
   1   3  -7   10.09    0.50
   1   3  -7    9.25    0.58
   0  -3  -7   92.21    2.15
   0  -3  -7   96.24    1.85
   0   3  -7   93.85    1.67
   0   3  -7   94.66    2.10
   0   3   7   95.18    1.83
   0   3  -7   94.45    1.99
  -1  -3  -7    7.56    0.44
  -1  -3  -7    8.82    0.63
  -1   3  -7    8.38    0.33
  -1   3  -7    8.40    0.58
  -1   3  -7    9.24    0.64
   1   3   7    8.77    0.44
  -2  -3  -7   18.46    0.91
  -2  -3  -7   17.66    0.62
  -2   3  -7   19.04    0.94
  -2   3  -7   19.06    0.89
  -3  -3  -7    3.55    0.32
  -3  -3  -7    3.83    0.54
  -3   3  -7    2.29    0.44
  -3   3  -7    3.60    0.55
  -4  -3  -7    6.72    0.71
  -4  -3  -7    5.62    0.37
  -4   3  -7    4.87    0.63
  -4   3  -7    4.84    0.60
  -5  -3  -7    4.51    0.36
  -5  -3  -7    4.71    0.63
  -5   3  -7    4.58    0.65
  -5   3  -7    4.74    0.63
  -6  -3  -7    0.61    0.33
  -6   3  -7    0.17    0.30
  -6   3  -7    0.24    0.33
  -7  -3  -7    0.72    0.38
  -7   3  -7    0.76    0.36
  -7   3  -7    0.86    0.44
  -8  -3  -7   -0.07    0.28
  -8   3  -7   -0.30    0.34
  -8   3  -7    0.17    0.36
  -9   3  -7    1.05    0.52
 -11  -4   7    0.67    0.51
  11  -4  -7    1.28    0.61
 -11   4   7    0.55    0.48
  11   4  -7   -0.37    0.43
  10  -4  -7   -0.38    0.30
 -10  -4   7   -0.17    0.38
  10   4  -7   -0.01    0.44
 -10   4   7   -0.03    0.31
   9  -4  -7    6.27    0.83
  -9  -4   7    5.44    0.78
   9   4  -7    5.94    0.83
  -9   4   7    6.31    0.85
   8  -4  -7    2.18    0.57
  -8  -4   7    1.65    0.47
   8   4  -7    1.92    0.51
  -8   4   7    2.06    0.53
  -7  -4   7   10.96    0.85
   7  -4  -7   11.36    0.88
  -7   4   7    8.76    0.86
   7   4  -7   11.03    0.88
   6  -4  -7    9.63    0.88
  -6  -4   7    7.72    0.78
  -6   4   7    8.24    0.81
   6   4  -7    8.45    0.82
   5  -4  -7   30.88    1.25
  -5  -4   7   32.56    1.25
   5   4  -7   34.42    1.32
   5   4  -7   32.65    0.91
  -5   4   7   33.81    1.29
  -4  -4   7   14.84    0.80
   4  -4  -7   15.43    0.85
  -4   4   7   17.37    0.89
   4   4  -7   15.88    0.85
   4   4  -7   15.27    0.64
   3  -4  -7    1.07    0.31
  -3  -4   7    0.83    0.27
  -3   4   7    0.48    0.25
   3   4  -7    0.91    0.22
   3   4  -7    1.02    0.22
   3   4  -7    1.25    0.34
   2  -4  -7   -0.02    0.20
  -2  -4   7    0.19    0.17
   2   4  -7   -0.04    0.15
   2   4  -7    0.17    0.17
   2   4  -7   -0.36    0.16
  -2   4   7    0.01    0.17
   1  -4  -7   12.09    0.74
  -1  -4   7   12.89    0.57
   1  -4  -7   12.35    0.64
  -1   4   7   12.57    0.63
   1   4  -7   13.05    0.60
   1   4  -7   13.48    0.65
   1   4  -7   13.25    0.68
   0  -4  -7   14.05    0.78
   0  -4  -7   13.96    0.66
   0   4  -7   13.65    0.54
   0   4  -7   13.49    0.73
   0   4  -7   13.99    0.70
   0   4   7   14.87    0.64
  -1  -4  -7   10.25    0.69
  -1  -4  -7   10.86    0.57
  -1   4  -7    9.32    0.66
   1   4   7   10.18    0.53
  -1   4  -7    9.80    0.40
  -1   4  -7   10.00    0.63
  -2  -4  -7    0.68    0.28
  -2  -4  -7    0.63    0.22
  -2   4  -7    0.43    0.26
  -2   4  -7    0.52    0.30
  -3  -4  -7    2.00    0.30
  -3  -4  -7    3.22    0.52
  -3   4  -7    1.59    0.39
  -3   4  -7    1.95    0.42
  -4  -4  -7    2.91    0.50
  -4  -4  -7    3.49    0.38
  -4   4  -7    3.45    0.56
  -4   4  -7    3.62    0.61
  -5  -4  -7   13.56    0.87
  -5  -4  -7   12.28    0.60
  -5   4  -7   12.54    0.92
  -5   4  -7   10.98    0.85
  -6  -4  -7    0.08    0.27
  -6  -4  -7    0.29    0.21
  -6   4  -7    0.17    0.30
  -6   4  -7    0.12    0.28
  -7  -4  -7    1.71    0.48
  -7   4  -7    1.52    0.47
  -7   4  -7    1.50    0.50
  -8   4  -7   -0.08    0.38
  -8   4  -7    0.33    0.40
  -9   4  -7    0.58    0.43
 -11  -5   7    0.15    0.44
 -11   5   7   -0.46    0.33
  11   5  -7   -0.26    0.44
  10  -5  -7   11.45    1.23
 -10  -5   7   10.93    1.19
  10   5  -7   12.30    1.30
 -10   5   7   11.65    1.23
  -9  -5   7    5.03    0.82
   9  -5  -7    3.74    0.72
  -9   5   7    4.54    0.74
   9   5  -7    4.17    0.75
  -8  -5   7    0.72    0.40
   8  -5  -7    0.00    0.35
   8   5  -7    1.12    0.51
  -8   5   7    0.43    0.33
  -7  -5   7   99.98    2.65
   7  -5  -7   98.43    2.62
   7   5  -7   98.41    2.67
  -7   5   7   96.17    2.60
   6  -5  -7   15.88    0.95
  -6  -5   7   15.68    0.95
  -6   5   7   15.11    0.93
   6   5  -7   14.41    0.94
   5  -5  -7   31.71    1.28
  -5  -5   7   32.60    1.27
   5   5  -7   34.34    1.33
  -4  -5   7    0.08    0.22
   4  -5  -7    0.07    0.24
  -4   5   7    0.04    0.23
   4   5  -7    0.13    0.16
   4   5  -7    0.34    0.29
  -3  -5   7    3.02    0.43
   3  -5  -7    2.81    0.45
   3   5  -7    3.76    0.38
   3   5  -7    4.01    0.47
  -3   5   7    3.87    0.50
  -2  -5   7    0.17    0.18
   2  -5  -7   -0.14    0.21
   2   5  -7   -0.05    0.15
   2   5  -7    0.11    0.22
  -2   5   7    0.38    0.23
   2   5  -7   -0.18    0.15
  -1  -5   7   10.00    0.53
   1  -5  -7   10.00    0.62
   1  -5  -7    8.68    0.67
  -1   5   7    9.76    0.59
   1   5  -7   10.17    0.59
   1   5  -7    9.79    0.55
   1   5  -7    9.41    0.59
   0  -5  -7    6.06    0.55
   0  -5  -7    4.21    0.51
   0   5  -7    5.62    0.41
   0   5  -7    4.52    0.49
   0   5   7    5.46    0.45
   0   5  -7    6.50    0.53
  -1  -5  -7    0.27    0.22
  -1  -5  -7   -0.25    0.16
  -1   5  -7   -0.03    0.20
  -1   5  -7   -0.17    0.13
   1   5   7   -0.02    0.15
  -1   5  -7   -0.09    0.22
  -2  -5  -7  132.32    2.46
  -2  -5  -7  133.11    2.83
  -2   5  -7  131.23    2.87
  -2   5  -7  131.25    2.80
  -2   5  -7  132.04    1.97
  -3  -5  -7   16.13    0.70
  -3  -5  -7   13.18    0.80
  -3   5  -7   13.54    0.85
  -3   5  -7   14.40    0.91
  -4  -5  -7    0.69    0.31
  -4  -5  -7    0.71    0.25
  -4   5  -7    1.38    0.41
  -4   5  -7    0.43    0.29
  -5  -5  -7   -0.22    0.21
  -5  -5  -7    0.21    0.21
  -5   5  -7    0.21    0.31
  -5   5  -7    0.15    0.27
  -6  -5  -7    3.19    0.55
  -6  -5  -7    3.13    0.42
  -6   5  -7    5.33    0.75
  -6   5  -7    3.45    0.67
  -7  -5  -7    3.66    0.61
  -7   5  -7    2.08    0.54
  -7   5  -7    3.10    0.66
  -8   5  -7    0.33    0.42
  -9   5  -7    1.29    0.59
 -10  -6   7   -0.36    0.35
  10  -6  -7    0.75    0.47
  10   6  -7    0.28    0.51
 -10   6   7   -0.24    0.30
   9  -6  -7    2.93    0.66
  -9  -6   7    3.59    0.72
   9   6  -7    3.49    0.75
  -9   6   7    1.89    0.53
   8  -6  -7    0.79    0.43
  -8  -6   7    0.53    0.35
   8   6  -7    0.20    0.37
  -8   6   7    0.65    0.38
   7  -6  -7    1.18    0.45
  -7  -6   7    1.05    0.42
   7   6  -7    1.21    0.44
  -7   6   7    0.79    0.37
  -6  -6   7   42.47    1.58
   6  -6  -7   39.02    1.54
   6   6  -7   40.38    1.59
   5  -6  -7    0.38    0.30
  -5  -6   7    1.24    0.39
  -5   6   7    0.67    0.33
   5   6  -7    1.34    0.43
  -4  -6   7    8.09    0.66
   4  -6  -7    7.98    0.76
  -4   6   7    8.45    0.78
   4   6  -7    6.90    0.70
  -3  -6   7    4.06    0.50
   3  -6  -7    5.18    0.61
   3   6  -7    6.08    0.64
  -3   6   7    6.03    0.64
   3   6  -7    5.02    0.41
  -2  -6   7    1.55    0.32
   2  -6  -7    0.71    0.28
   2   6  -7    1.53    0.30
   2   6  -7    1.50    0.35
  -2   6   7    0.70    0.27
  -1  -6   7   51.28    1.32
   1  -6  -7   51.13    1.47
  -1   6   7   49.89    1.42
   1   6  -7   53.24    1.46
   1   6  -7   51.27    1.34
   1   6  -7   50.02    1.40
   0  -6  -7    0.63    0.31
   0  -6  -7    1.07    0.31
   0   6  -7    1.25    0.27
   0   6   7    0.39    0.24
   0   6  -7    0.48    0.26
   0   6  -7    0.53    0.27
  -1  -6  -7    0.10    0.22
  -1  -6  -7    0.30    0.22
   1   6   7    0.29    0.23
  -1   6  -7    0.40    0.26
  -1   6  -7    0.60    0.28
  -1   6  -7    0.41    0.19
  -2  -6  -7   97.19    2.36
  -2  -6  -7   98.58    2.11
  -2   6  -7   97.73    1.67
  -2   6  -7  100.06    2.43
  -2   6  -7   93.93    2.32
  -3  -6  -7   30.47    1.22
  -3  -6  -7   26.21    1.00
  -3   6  -7   27.86    1.23
  -3   6  -7   27.33    0.63
  -3   6  -7   29.08    1.28
  -4  -6  -7    4.98    0.53
  -4  -6  -7    5.28    0.63
  -4   6  -7    4.91    0.65
  -4   6  -7    4.89    0.63
  -5  -6  -7    0.27    0.25
  -5  -6  -7    0.30    0.28
  -5   6  -7    0.53    0.35
  -5   6  -7    0.10    0.31
  -6  -6  -7    3.71    0.59
  -6  -6  -7    3.36    0.47
  -6   6  -7    2.43    0.59
  -6   6  -7    3.09    0.60
  -7  -6  -7   -0.03    0.25
  -7   6  -7    0.06    0.33
  -8   6  -7    2.35    0.61
 -10  -7   7    0.96    0.52
  10  -7  -7    1.30    0.59
  10   7  -7    1.69    0.64
 -10   7   7    0.70    0.48
   9  -7  -7    0.76    0.47
  -9  -7   7    0.50    0.42
  -9   7   7    0.43    0.37
   9   7  -7    0.50    0.45
  -8  -7   7    0.84    0.40
   8  -7  -7    1.33    0.51
   8   7  -7    0.41    0.39
  -8   7   7    0.90    0.43
  -7  -7   7    9.21    0.95
   7  -7  -7    8.87    0.91
   7   7  -7    9.32    0.96
  -7   7   7    7.49    0.83
   6  -7  -7   65.63    2.07
  -6  -7   7   63.07    2.02
   6   7  -7   62.78    2.05
  -6   7   7   67.21    2.11
   5  -7  -7   17.47    1.00
  -5  -7   7   19.01    1.03
   5   7  -7   16.82    1.03
  -5   7   7   18.12    1.01
   4  -7  -7   -0.07    0.28
  -4  -7   7    0.29    0.28
   4   7  -7    0.38    0.32
  -4   7   7    0.52    0.31
  -3  -7   7    0.64    0.29
   3  -7  -7    0.75    0.35
   3   7  -7    0.80    0.33
   3   7  -7    0.43    0.19
  -3   7   7    0.78    0.33
  -2  -7   7    0.86    0.28
   2  -7  -7    1.17    0.36
  -2   7   7    0.93    0.31
   2   7  -7    1.21    0.27
   2   7  -7    0.93    0.34
   1  -7  -7    3.10    0.46
  -1  -7   7    3.37    0.43
   1   7  -7    2.72    0.40
   1   7  -7    4.02    0.48
  -1   7   7    4.51    0.55
   0  -7  -7    7.94    0.63
   0  -7  -7    6.28    0.65
   0   7  -7    7.27    0.60
   0   7  -7    8.18    0.62
   0   7   7    7.15    0.66
   0   7  -7    7.69    0.54
  -1  -7  -7    0.74    0.30
  -1  -7  -7    0.28    0.24
  -1   7  -7    0.41    0.21
  -1   7  -7    0.39    0.26
  -1   7  -7    0.80    0.29
   1   7   7    0.25    0.24
  -2  -7  -7    4.82    0.56
  -2  -7  -7    4.84    0.61
  -2   7  -7    4.56    0.37
  -2   7  -7    4.96    0.63
  -2   7  -7    3.84    0.54
  -3  -7  -7    1.14    0.36
  -3  -7  -7    1.75    0.37
  -3   7  -7    1.38    0.40
  -3   7  -7    1.75    0.23
  -3   7  -7    1.51    0.39
  -4  -7  -7    2.71    0.44
  -4  -7  -7    2.43    0.47
  -4   7  -7    1.95    0.46
  -4   7  -7    2.40    0.53
  -5  -7  -7    0.41    0.31
  -5  -7  -7    0.47    0.30
  -5   7  -7    0.66    0.37
  -5   7  -7    0.64    0.34
  -6  -7  -7    7.26    0.82
  -6  -7  -7    6.34    0.66
  -6   7  -7    6.41    0.86
  -6   7  -7    4.68    0.76
  -7  -7  -7   -0.18    0.26
  -7   7  -7   -0.67    0.27
  -8   7  -7    1.03    0.48
  10  -8  -7    2.55    0.73
 -10  -8   7    1.26    0.53
 -10   8   7    1.68    0.60
  10   8  -7    1.51    0.63
   9  -8  -7    9.38    1.12
  -9  -8   7    8.62    1.12
   9   8  -7    8.70    1.11
  -9   8   7    6.76    0.94
   8  -8  -7    0.85    0.50
  -8  -8   7    1.22    0.48
  -8   8   7    0.93    0.42
   8   8  -7    1.21    0.52
   7  -8  -7    6.60    0.83
  -7  -8   7    9.22    1.02
   7   8  -7    6.43    0.89
  -6  -8   7   87.50    2.46
   6  -8  -7   85.48    2.47
   6   8  -7   86.56    2.51
  -6   8   7   85.31    2.47
   5  -8  -7   16.59    1.05
  -5  -8   7   17.22    1.02
  -5   8   7   19.91    1.09
   5   8  -7   15.94    1.01
  -4  -8   7    3.10    0.52
   4  -8  -7    4.54    0.62
  -4   8   7    4.70    0.63
   4   8  -7    3.88    0.59
   3  -8  -7   14.27    0.88
  -3  -8   7   13.78    0.83
  -3   8   7   13.75    0.88
   3   8  -7   15.54    0.92
  -2  -8   7    4.61    0.56
   2  -8  -7    3.73    0.54
   2   8  -7    4.20    0.55
   2   8  -7    3.12    0.39
  -2   8   7    4.02    0.57
   1  -8  -7    4.40    0.56
   1   8  -7    5.02    0.55
   1   8  -7    5.55    0.58
  -1   8   7    5.21    0.60
   0  -8  -7   28.28    1.23
   0  -8  -7   29.96    1.19
   0   8  -7   30.00    1.05
   0   8   7   29.83    1.15
   0   8  -7   28.63    1.13
  -1  -8  -7   -0.20    0.24
  -1  -8  -7    0.09    0.21
  -1   8  -7   -0.32    0.21
  -1   8  -7   -0.17    0.19
  -1   8  -7    0.12    0.22
   1   8   7    0.19    0.25
  -2  -8  -7    4.98    0.58
  -2  -8  -7    4.87    0.61
  -2   8  -7    5.11    0.42
  -2   8  -7    4.94    0.66
  -2   8  -7    4.80    0.66
  -3  -8  -7    0.23    0.27
  -3  -8  -7    0.43    0.29
  -3   8  -7    0.42    0.19
  -3   8  -7    0.32    0.30
  -3   8  -7    0.36    0.31
  -4  -8  -7    4.61    0.62
  -4  -8  -7    3.98    0.55
  -4   8  -7    3.41    0.63
  -4   8  -7    3.19    0.61
  -5  -8  -7    0.41    0.30
  -5  -8  -7   -0.05    0.23
  -5   8  -7    0.11    0.34
  -5   8  -7   -0.59    0.28
  -6  -8  -7   -0.33    0.25
  -6   8  -7   -0.27    0.33
  -7  -8  -7    1.46    0.42
  -7   8  -7    1.11    0.50
  -8  -8  -7   21.36    1.12
  -8   8  -7   21.88    1.43
  -9  -9   7    0.68    0.46
   9  -9  -7    0.24    0.47
  -9   9   7    0.08    0.37
   9   9  -7    0.29    0.53
  -8  -9   7    1.96    0.61
   8  -9  -7    2.02    0.64
   8   9  -7    2.96    0.73
  -8   9   7    1.25    0.49
   7  -9  -7   16.99    1.19
  -7  -9   7   16.03    1.14
  -7   9   7   17.43    1.20
   7   9  -7   17.15    1.25
  -6  -9   7   13.16    0.99
   6  -9  -7   12.40    1.00
  -6   9   7   11.95    1.13
   6   9  -7   11.27    1.09
  -5  -9   7    2.70    0.54
   5  -9  -7    2.43    0.57
  -5   9   7    2.63    0.57
   5   9  -7    2.21    0.52
   4  -9  -7    0.80    0.39
  -4  -9   7    1.35    0.42
  -4   9   7    1.37    0.42
   4   9  -7    2.26    0.53
  -3  -9   7    4.17    0.58
   3  -9  -7    3.70    0.59
   3   9  -7    3.88    0.61
  -3   9   7    4.76    0.65
   2  -9  -7   30.82    1.33
  -2  -9   7   34.24    1.27
   2   9  -7   33.69    1.30
   2   9  -7   32.62    1.06
  -2   9   7   31.92    1.32
   1  -9  -7   -0.17    0.26
   1   9  -7    0.12    0.22
  -1   9   7    0.17    0.28
   1   9  -7   -0.10    0.25
   0  -9  -7   13.64    0.87
   0   9  -7   15.04    0.84
   0   9  -7   12.37    0.74
   0   9   7   13.67    0.85
  -1  -9  -7   41.39    1.49
  -1  -9  -7   37.34    1.40
  -1   9  -7   36.79    1.43
  -1   9  -7   37.31    1.19
  -1   9  -7   40.05    1.43
   1   9   7   37.48    1.38
  -2  -9  -7   48.72    1.62
  -2  -9  -7   48.64    1.59
  -2   9  -7   45.39    1.64
  -2   9  -7   45.73    1.27
  -2   9  -7   46.04    1.65
  -3  -9  -7    3.86    0.58
  -3  -9  -7    3.94    0.58
  -3   9  -7    2.68    0.57
  -3   9  -7    2.67    0.51
  -3   9  -7    2.72    0.36
  -4  -9  -7    0.16    0.26
  -4  -9  -7   -0.06    0.25
  -4   9  -7    0.32    0.31
  -5  -9  -7    7.26    0.76
  -5   9  -7    5.79    0.79
  -6  -9  -7    4.65    0.65
  -6   9  -7    3.36    0.66
  -7  -9  -7    8.16    0.84
  -7   9  -7    7.31    0.94
  -9 -10   7   10.21    1.20
   9 -10  -7   12.30    1.35
  -9  10   7   11.96    1.28
   9  10  -7    9.22    1.14
   8 -10  -7    0.64    0.51
  -8 -10   7    0.17    0.38
   8  10  -7   -0.15    0.38
  -7 -10   7    2.04    0.58
   7 -10  -7    2.00    0.60
  -7  10   7    1.76    0.54
   7  10  -7    1.65    0.60
   6 -10  -7    0.39    0.38
  -6 -10   7    1.68    0.51
   6  10  -7    0.35    0.43
  -6  10   7    0.59    0.38
  -5 -10   7    2.94    0.58
   5 -10  -7    2.27    0.57
   5  10  -7    2.85    0.63
  -5  10   7    2.22    0.57
  -4 -10   7    5.82    0.75
   4 -10  -7    7.01    0.85
   4  10  -7    7.81    0.87
  -4  10   7    7.14    0.86
  -3 -10   7    0.82    0.37
   3 -10  -7    0.39    0.33
   3  10  -7    1.19    0.43
  -3  10   7    0.60    0.33
   2 -10  -7    2.59    0.55
   2  10  -7    1.72    0.45
  -2  10   7    1.75    0.47
   1 -10  -7    8.35    0.86
  -1  10   7    7.33    0.79
   1  10  -7    7.68    0.75
   0 -10  -7   50.37    1.71
   0  10   7   49.77    1.65
   0  10  -7   48.12    1.50
  -1 -10  -7   39.61    1.51
  -1 -10  -7   37.24    1.47
  -1  10  -7   38.98    1.28
   1  10   7   36.53    1.43
  -2 -10  -7   13.60    0.92
  -2 -10  -7   14.39    0.90
  -2  10  -7   15.97    0.79
  -2  10  -7   14.11    0.98
  -3 -10  -7    5.56    0.70
  -3 -10  -7    4.91    0.66
  -3  10  -7    4.93    0.49
  -3  10  -7    4.56    0.65
  -4 -10  -7   17.68    1.03
  -4 -10  -7   16.74    0.98
  -4  10  -7   15.87    1.09
  -5 -10  -7   -0.24    0.28
  -5  10  -7    0.22    0.39
  -6 -10  -7    0.47    0.35
  -6  10  -7    1.09    0.48
  -7 -10  -7    0.45    0.41
  -7  10  -7    0.35    0.45
   8 -11  -7    0.55    0.50
  -8 -11   7    2.24    0.64
   8  11  -7    0.77    0.61
   7 -11  -7    0.44    0.45
  -7 -11   7   -0.12    0.34
   7  11  -7    0.42    0.48
  -7  11   7    0.47    0.48
   6 -11  -7   17.58    1.25
  -6 -11   7   19.27    1.25
  -6  11   7   19.66    1.28
   6  11  -7   17.88    1.29
   5 -11  -7    1.14    0.49
  -5 -11   7    0.07    0.35
   5  11  -7    1.50    0.55
  -5  11   7    0.89    0.43
  -4 -11   7    4.88    0.73
   4 -11  -7    5.15    0.77
   4  11  -7    5.31    0.79
  -4  11   7    5.98    0.80
   3 -11  -7   19.66    1.19
  -3 -11   7   22.62    1.15
   3  11  -7   20.54    1.18
  -3  11   7   20.72    1.20
   2 -11  -7    1.84    0.51
   2  11  -7    2.17    0.53
  -2  11   7    1.37    0.44
   1 -11  -7    0.16    0.29
   1  11  -7   -0.48    0.25
  -1  11   7    0.16    0.28
   0 -11  -7    2.51    0.53
   0  11  -7    2.26    0.45
   0  11   7    2.16    0.49
  -1 -11  -7    3.30    0.56
  -1 -11  -7    3.94    0.61
   1  11   7    4.80    0.67
  -1  11  -7    3.65    0.54
  -2 -11  -7    0.47    0.36
  -2 -11  -7    0.23    0.27
  -2  11  -7    0.35    0.34
  -2  11  -7    0.18    0.26
  -3 -11  -7   -0.24    0.28
  -3 -11  -7    0.15    0.28
  -3  11  -7    0.11    0.23
  -3  11  -7    0.15    0.29
  -4 -11  -7    1.49    0.48
  -4  11  -7    0.89    0.45
  -5 -11  -7    1.34    0.46
  -5  11  -7    1.06    0.52
  -6 -11  -7    8.79    0.94
  -6  11  -7    8.32    1.04
   8 -12  -7    0.31    0.51
  -8 -12   7    0.21    0.46
   8  12  -7    0.97    0.61
  -8  12   7    0.04    0.45
   7 -12  -7   12.39    1.24
  -7 -12   7   12.30    1.24
  -7  12   7   12.32    1.25
   7  12  -7   10.74    1.20
  -6 -12   7    2.45    0.59
   6 -12  -7    3.05    0.71
  -6  12   7    3.77    0.74
   6  12  -7    4.92    0.82
   5 -12  -7    8.60    1.03
  -5 -12   7   10.94    1.09
   5  12  -7    9.73    1.09
  -5  12   7    7.51    0.97
  -4 -12   7    1.18    0.43
   4 -12  -7    0.69    0.44
   4  12  -7    0.63    0.43
  -4  12   7    0.79    0.46
   3 -12  -7    8.49    0.93
   3  12  -7    6.08    0.79
  -3  12   7    5.78    0.78
   2 -12  -7    2.80    0.64
   2  12  -7    2.36    0.57
  -2  12   7    2.49    0.60
   1 -12  -7    0.43    0.35
   1  12  -7    1.08    0.39
  -1  12   7    0.03    0.32
   0 -12  -7   10.26    1.01
   0  12  -7    7.66    0.77
   0  12   7   11.02    1.02
  -1 -12  -7    1.34    0.41
  -1 -12  -7    1.38    0.46
   1  12   7    0.92    0.42
  -1  12  -7    0.83    0.35
  -2 -12  -7    0.98    0.39
  -2 -12  -7    0.46    0.41
  -2  12  -7    0.82    0.35
  -2  12  -7    0.46    0.35
  -3 -12  -7    2.03    0.53
  -3 -12  -7    2.01    0.47
  -3  12  -7    1.49    0.38
  -3  12  -7    2.32    0.61
  -4 -12  -7    0.04    0.37
  -4  12  -7   -0.14    0.32
  -4  12  -7    0.09    0.26
  -5 -12  -7    1.37    0.50
  -5  12  -7    1.04    0.47
  -6 -12  -7   -0.31    0.34
  -6  12  -7   -0.01    0.40
  -7 -13   7    0.89    0.53
   7 -13  -7   -0.36    0.42
  -7  13   7   -0.29    0.38
   7  13  -7   -0.69    0.39
   6 -13  -7    0.81    0.59
  -6 -13   7   -0.41    0.35
  -6  13   7   -0.25    0.40
   6  13  -7   -0.76    0.41
   5 -13  -7    0.56    0.50
  -5 -13   7    0.70    0.43
  -5  13   7    0.70    0.51
   5  13  -7    0.58    0.51
   4 -13  -7    1.15    0.51
  -4 -13   7    1.77    0.52
   4  13  -7    1.10    0.52
  -4  13   7    0.32    0.40
   3 -13  -7    0.50    0.44
   3  13  -7   -0.01    0.33
  -3  13   7   -0.08    0.38
   2 -13  -7    3.19    0.70
   2  13  -7    3.00    0.60
  -2  13   7    3.32    0.67
   1 -13  -7    0.36    0.42
   1  13  -7    0.12    0.34
  -1  13   7    0.29    0.34
   0 -13  -7    0.53    0.44
   0  13  -7   -0.13    0.31
   0  13   7    0.57    0.39
  -1 -13  -7   16.26    1.07
  -1 -13  -7   14.73    1.10
  -1  13  -7   16.20    0.97
   1  13   7   13.86    1.03
  -2 -13  -7    0.52    0.34
  -2 -13  -7    0.47    0.41
  -2  13  -7   -0.11    0.26
  -2  13  -7    1.07    0.45
  -3 -13  -7    0.20    0.38
  -3  13  -7    0.00    0.28
  -3  13  -7    0.59    0.43
  -4 -13  -7    0.65    0.47
  -4  13  -7    0.53    0.41
  -4  13  -7    0.28    0.31
  -5 -13  -7   -0.32    0.38
  -5  13  -7    0.26    0.40
   6 -14  -7    1.10    0.63
  -6 -14   7    2.34    0.65
   6  14  -7    2.62    0.74
  -6  14   7    2.07    0.67
  -5 -14   7    6.73    0.96
   5 -14  -7    5.48    0.90
  -5  14   7    5.26    0.93
   5  14  -7    4.62    0.90
   4 -14  -7    2.81    0.68
  -4  14   7    3.78    0.75
   4  14  -7    3.02    0.71
   3 -14  -7    3.90    0.74
  -3  14   7    2.86    0.64
   3  14  -7    2.91    0.67
   2 -14  -7    1.04    0.54
  -2  14   7    1.72    0.60
   2  14  -7    0.27    0.42
   1 -14  -7   20.27    1.30
  -1  14   7   20.56    1.26
   1  14  -7   21.19    1.24
   0 -14  -7    1.04    0.46
   0  14  -7    0.34    0.38
   0  14   7    0.74    0.45
  -1 -14  -7    2.89    0.60
  -1 -14  -7    2.68    0.62
  -1  14  -7    2.64    0.56
   1  14   7    1.79    0.53
  -2 -14  -7    0.30    0.41
  -2  14  -7    0.54    0.41
  -3 -14  -7   -0.78    0.29
  -3  14  -7    0.55    0.35
  -3  14  -7   -0.32    0.28
  -4 -14  -7    2.99    0.70
  -4  14  -7    2.91    0.67
   5 -15  -7    1.85    0.69
   5  15  -7    1.76    0.70
  -5  15   7    0.74    0.57
   4 -15  -7    0.12    0.49
   4  15  -7    0.01    0.47
  -4  15   7    0.56    0.51
   3 -15  -7    4.37    0.84
  -3  15   7    3.78    0.74
   3  15  -7    3.00    0.69
   2 -15  -7    0.40    0.53
   2  15  -7    0.27    0.44
  -2  15   7    0.27    0.46
   1 -15  -7    0.29    0.48
   1  15  -7    0.21    0.40
  -1  15   7    0.33    0.41
   0 -15  -7    2.23    0.62
   0  15   7    2.28    0.62
   0  15  -7    1.74    0.53
  -1 -15  -7   -0.24    0.42
  -1 -15  -7   -0.39    0.28
  -1  15  -7    0.44    0.41
  -2 -15  -7    4.29    0.81
  -2  15  -7    4.56    0.69
  -3 -15  -7    1.27    0.59
  -3  15  -7    0.04    0.35
  -3  15  -7    0.78    0.46
   4 -16  -7   38.95    2.01
  -4  16   7   38.09    1.98
   4  16  -7   37.42    1.95
   3 -16  -7    5.90    0.94
  -3  16   7    2.51    0.70
   3  16  -7    5.52    0.91
   2 -16  -7    0.61    0.52
  -2  16   7    0.63    0.48
   2  16  -7    0.06    0.47
   1 -16  -7   30.03    1.73
  -1  16   7   28.03    1.63
   1  16  -7   26.08    1.50
   0 -16  -7    4.01    0.84
   0  16  -7    3.49    0.69
   0  16   7    4.04    0.81
  -1 -16  -7    0.51    0.51
  -1  16  -7   -0.83    0.34
  -2 -16  -7    3.27    0.75
  -2  16  -7    1.68    0.52
 -11   0   8    0.58    0.46
  11   0  -8    0.00    0.41
 -10   0   8   27.47    1.53
  10   0  -8   30.29    1.63
   9   0  -8    0.14    0.39
  -9   0   8    0.48    0.39
   8   0  -8   14.55    1.04
  -8   0   8   17.27    1.10
   7   0  -8   -0.20    0.27
  -7   0   8    0.00    0.25
  -6   0   8    4.48    0.61
   6   0  -8    4.68    0.64
   5   0  -8    0.10    0.22
  -5   0   8    0.26    0.27
   5   0  -8   -0.53    0.24
  -4   0   8  144.54    2.90
   4   0  -8  145.51    2.94
   4   0  -8  144.67    2.83
   3   0  -8   -0.06    0.22
   3   0  -8   -0.03    0.18
   3   0  -8    0.04    0.12
  -3   0   8    0.14    0.19
   2   0  -8   26.46    1.04
   2   0  -8   25.40    0.91
   2   0  -8   25.72    0.80
  -2   0   8   26.63    0.89
   1   0  -8    0.20    0.17
   1   0  -8    0.05    0.16
   1   0  -8   -0.15    0.20
  -1   0   8    0.15    0.15
   0   0  -8    1.63    0.37
   0   0  -8    1.52    0.31
   0   0  -8    2.07    0.27
  -1   0  -8   -0.25    0.18
  -1   0  -8    0.02    0.23
  -1   0  -8   -0.10    0.11
  -2   0  -8    3.36    0.49
  -2   0  -8    3.91    0.54
  -3   0  -8   -0.03    0.25
  -3   0  -8    0.28    0.30
  -4   0  -8   38.45    1.49
  -4   0  -8   36.60    1.41
  -5   0  -8   -0.17    0.25
  -5   0  -8    0.27    0.30
  -6   0  -8   11.48    0.93
  -6   0  -8   11.80    0.95
  -7   0  -8   -0.04    0.32
  -7   0  -8   -0.09    0.32
  -8   0  -8    0.48    0.40
  -9   0  -8   -0.23    0.31
  11  -1  -8    9.20    1.15
 -11  -1   8    9.73    1.18
  11   1  -8    8.28    1.11
 -11   1   8    8.00    1.09
  10  -1  -8    1.37    0.60
 -10  -1   8    1.31    0.50
  10   1  -8    1.50    0.54
 -10   1   8    1.43    0.55
   9  -1  -8    3.02    0.68
  -9  -1   8    3.29    0.64
   9   1  -8    3.06    0.64
  -9   1   8    3.75    0.70
  -8  -1   8    5.36    0.72
   8  -1  -8    3.95    0.67
  -8   1   8    4.24    0.68
   8   1  -8    4.10    0.67
   7  -1  -8    0.75    0.39
  -7  -1   8    0.76    0.36
  -7   1   8    0.94    0.39
   7   1  -8    0.68    0.42
   6  -1  -8    5.53    0.71
  -6  -1   8    4.81    0.62
   6   1  -8    4.59    0.63
  -6   1   8    5.21    0.68
   6   1  -8    5.28    0.54
  -5  -1   8    2.39    0.46
   5  -1  -8    3.49    0.56
  -5   1   8    1.96    0.44
   5   1  -8    2.13    0.36
   5   1  -8    1.98    0.44
  -4  -1   8    7.67    0.59
   4  -1  -8    7.93    0.62
   4  -1  -8    8.27    0.63
  -4   1   8    8.69    0.64
   4   1  -8    8.18    0.35
   4   1  -8    8.07    0.57
   4   1  -8    7.64    0.71
   3  -1  -8   69.76    1.76
   3  -1  -8   71.40    1.83
  -3  -1   8   76.09    1.75
   3   1  -8   74.53    1.42
  -3   1   8   73.70    1.77
   3   1  -8   73.25    1.79
   3   1  -8   73.35    1.78
   2  -1  -8    1.79    0.36
  -2  -1   8    3.00    0.37
   2  -1  -8    2.66    0.38
   2   1  -8    2.23    0.31
   2   1  -8    2.04    0.34
  -2   1   8    1.85    0.31
   2   1  -8    2.06    0.37
   1  -1  -8    1.68    0.30
  -1  -1   8    1.26    0.23
   1  -1  -8    1.39    0.33
   1  -1  -8    1.55    0.28
   1   1  -8    1.77    0.31
   1   1  -8    1.10    0.25
  -1   1   8    1.19    0.25
   1   1  -8    1.05    0.30
   0  -1  -8   10.51    0.70
   0  -1  -8    9.70    0.47
   0  -1  -8   10.65    0.61
   0   1  -8   10.22    0.69
   0   1  -8    9.24    0.59
   0   1  -8   10.58    0.46
   0   1   8    9.27    0.45
  -1  -1  -8   27.73    1.14
  -1  -1  -8   25.37    0.68
  -1  -1  -8   26.71    1.02
  -1   1  -8   25.63    1.09
  -1   1  -8   26.37    0.59
  -1   1  -8   27.65    1.04
  -2  -1  -8   17.36    0.45
  -2  -1  -8   18.84    0.95
  -2  -1  -8   17.31    0.86
  -2   1  -8   18.07    0.89
  -2   1  -8   18.43    0.96
  -3  -1  -8   38.98    1.45
  -3  -1  -8   42.17    1.44
  -3   1  -8   39.71    1.41
  -3   1  -8   39.68    1.47
  -4  -1  -8    0.69    0.35
  -4  -1  -8    1.15    0.39
  -4   1  -8    1.50    0.40
  -4   1  -8    0.58    0.31
  -5  -1  -8    0.21    0.33
  -5  -1  -8    0.54    0.34
  -5   1  -8    0.28    0.31
  -5   1  -8    0.51    0.32
  -6  -1  -8    6.26    0.83
  -6   1  -8    4.29    0.67
  -6   1  -8    6.87    0.86
  -7  -1  -8    6.25    0.79
  -7   1  -8    8.33    0.96
  -7   1  -8    7.83    0.93
  -8  -1  -8    4.29    0.76
  -8   1  -8    3.28    0.68
  -8   1  -8    5.87    0.89
  -9  -1  -8    0.39    0.39
  -9   1  -8    0.69    0.43
 -11  -2   8    1.12    0.55
  11  -2  -8    0.71    0.51
  11   2  -8    0.04    0.49
 -11   2   8    0.50    0.45
 -10  -2   8    1.55    0.53
  10  -2  -8    0.66    0.48
  10   2  -8    0.76    0.48
 -10   2   8    0.98    0.47
  -9  -2   8    1.28    0.49
   9  -2  -8    1.11    0.50
  -9   2   8    1.28    0.48
   9   2  -8    1.37    0.55
   8  -2  -8   13.11    1.05
  -8  -2   8   14.79    1.06
   8   2  -8   12.43    1.15
  -8   2   8   11.42    1.07
  -7  -2   8    6.62    0.78
   7  -2  -8    5.45    0.72
   7   2  -8    5.66    0.75
  -7   2   8    5.25    0.70
  -6  -2   8    3.86    0.56
   6  -2  -8    4.03    0.60
  -6   2   8    4.99    0.64
   6   2  -8    3.64    0.45
   6   2  -8    3.66    0.58
  -5  -2   8   50.09    1.57
   5  -2  -8   45.71    1.56
  -5   2   8   44.99    1.53
   5   2  -8   48.94    1.58
   5   2  -8   47.29    1.31
   4  -2  -8   13.99    0.82
  -4  -2   8   18.01    0.86
  -4   2   8   16.76    0.86
   4   2  -8   15.44    0.84
   4   2  -8   16.47    0.53
   4   2  -8   17.45    0.79
   3  -2  -8    3.39    0.47
   3  -2  -8    3.99    0.50
  -3  -2   8    3.65    0.44
   3   2  -8    3.45    0.42
   3   2  -8    4.18    0.36
   3   2  -8    3.39    0.44
  -3   2   8    3.70    0.45
  -2  -2   8   14.83    0.67
   2  -2  -8   15.70    0.73
   2  -2  -8   17.52    0.87
   2   2  -8   15.76    0.65
   2   2  -8   15.93    0.78
  -2   2   8   15.45    0.71
   2   2  -8   15.53    0.72
   1  -2  -8    2.06    0.39
  -1  -2   8    1.90    0.28
   1  -2  -8    1.68    0.30
   1   2  -8    1.68    0.28
   1   2  -8    1.03    0.27
   1   2  -8    1.55    0.32
   0  -2  -8   25.33    1.07
   0  -2  -8   26.67    0.82
   0   2   8   27.07    0.82
   0   2  -8   28.41    1.11
   0   2  -8   27.32    0.99
   0   2  -8   27.21    0.74
  -1  -2  -8   -0.16    0.12
  -1  -2  -8    0.01    0.21
  -1   2  -8    0.10    0.22
  -1   2  -8    0.00    0.24
  -1   2  -8    0.07    0.10
  -2  -2  -8  104.94    1.76
  -2  -2  -8  107.25    2.53
  -2  -2  -8  104.44    2.38
  -2   2  -8  107.43    2.54
  -2   2  -8  105.88    2.40
  -3  -2  -8   59.00    1.82
  -3  -2  -8   59.47    1.07
  -3   2  -8   60.48    1.80
  -3   2  -8   61.21    1.88
  -4  -2  -8   14.19    0.91
  -4   2  -8   13.21    0.87
  -4   2  -8   14.11    0.92
  -5  -2  -8    2.25    0.50
  -5   2  -8    2.54    0.53
  -5   2  -8    3.38    0.59
  -6  -2  -8    0.24    0.33
  -6   2  -8    0.08    0.31
  -6   2  -8   -0.33    0.28
  -7  -2  -8    5.10    0.76
  -7   2  -8    5.17    0.77
  -7   2  -8    3.60    0.68
  -8  -2  -8    5.18    0.80
  -8   2  -8    5.42    0.82
  -8   2  -8    6.17    0.90
 -11  -3   8    1.21    0.58
  11  -3  -8    2.39    0.72
  11   3  -8    0.30    0.55
 -11   3   8    1.24    0.55
 -10  -3   8    1.83    0.56
  10  -3  -8    3.73    0.73
 -10   3   8    4.30    0.75
  10   3  -8    3.17    0.70
   9  -3  -8    3.46    0.75
  -9  -3   8    4.60    0.74
  -9   3   8    3.82    0.72
   9   3  -8    3.55    0.69
  -8  -3   8    0.89    0.43
   8  -3  -8    0.87    0.51
  -8   3   8    0.87    0.45
   8   3  -8    0.60    0.47
  -7  -3   8    8.19    0.85
   7  -3  -8    9.68    0.93
   7   3  -8   10.94    0.88
  -7   3   8    9.70    0.93
  -6  -3   8   18.94    1.03
   6  -3  -8   23.02    1.18
   6   3  -8   19.76    1.07
  -6   3   8   22.02    1.13
  -5  -3   8   75.14    2.02
   5  -3  -8   75.66    2.06
  -5   3   8   77.25    2.06
   5   3  -8   77.94    1.72
   5   3  -8   74.69    2.05
  -4  -3   8   27.94    1.09
   4  -3  -8   24.46    1.06
   4   3  -8   26.17    1.09
  -4   3   8   28.06    1.11
   4   3  -8   25.84    0.74
   4   3  -8   26.03    0.93
   3  -3  -8   11.53    0.69
  -3  -3   8   11.10    0.65
   3   3  -8   11.81    0.70
   3   3  -8   11.51    0.64
  -3   3   8   11.37    0.69
   3   3  -8   12.23    0.55
   2  -3  -8   16.34    0.88
   2  -3  -8   17.43    0.79
  -2  -3   8   17.34    0.72
   2   3  -8   16.14    0.78
   2   3  -8   15.35    0.67
   2   3  -8   15.79    0.73
  -2   3   8   16.00    0.75
   1  -3  -8    6.43    0.48
   1  -3  -8    7.61    0.73
  -1  -3   8    6.27    0.42
   1   3  -8    6.67    0.44
   1   3  -8    6.34    0.49
  -1   3   8    6.37    0.47
   1   3  -8    6.70    0.56
   0  -3  -8   18.76    0.73
   0  -3  -8   16.77    0.89
   0   3  -8   18.59    0.90
   0   3  -8   18.20    0.61
   0   3   8   18.64    0.71
   0   3  -8   17.83    0.82
  -1  -3  -8   12.53    0.56
  -1  -3  -8   12.23    0.81
  -1   3  -8   12.11    0.72
  -1   3  -8   13.53    0.41
  -1   3  -8   12.51    0.80
  -2  -3  -8   38.12    0.94
  -2  -3  -8   36.84    1.36
  -2   3  -8   34.18    1.36
  -2   3  -8   35.30    1.30
  -3  -3  -8   20.38    1.02
  -3  -3  -8   18.85    0.62
  -3   3  -8   17.01    0.95
  -3   3  -8   16.80    0.98
  -4  -3  -8   14.48    0.52
  -4  -3  -8   12.94    0.86
  -4   3  -8   12.84    0.92
  -4   3  -8   14.23    0.92
  -5  -3  -8    0.79    0.32
  -5   3  -8   -0.05    0.25
  -5   3  -8    0.16    0.29
  -6  -3  -8    2.80    0.56
  -6   3  -8    2.65    0.57
  -6   3  -8    2.12    0.53
  -7  -3  -8   -0.10    0.31
  -7   3  -8    0.03    0.38
  -7   3  -8   -0.10    0.28
  -8  -3  -8    0.46    0.38
  -8   3  -8    0.41    0.42
  -8   3  -8    0.65    0.46
  11  -4  -8    5.03    0.93
 -11  -4   8    4.11    0.81
 -11   4   8    4.16    0.82
  11   4  -8    4.07    0.82
  10  -4  -8   -0.07    0.39
 -10  -4   8    0.23    0.38
 -10   4   8    0.15    0.38
  10   4  -8    0.19    0.42
   9  -4  -8    0.30    0.49
  -9  -4   8    1.07    0.49
   9   4  -8    0.10    0.41
  -9   4   8    0.31    0.40
   8  -4  -8    5.02    0.77
  -8  -4   8    5.76    0.79
   8   4  -8    4.24    0.70
  -8   4   8    3.59    0.65
   7  -4  -8   12.76    1.13
  -7  -4   8    8.41    0.87
  -7   4   8    9.29    0.92
   7   4  -8    8.82    0.90
   6  -4  -8    5.67    0.74
  -6  -4   8    4.45    0.60
  -6   4   8    4.64    0.65
   6   4  -8    4.33    0.64
  -5  -4   8   69.18    1.95
   5  -4  -8   71.18    2.02
   5   4  -8   69.49    1.98
   5   4  -8   70.75    1.58
  -5   4   8   74.02    2.03
  -4  -4   8    3.97    0.50
   4  -4  -8    5.54    0.63
   4   4  -8    5.09    0.47
   4   4  -8    4.87    0.59
   4   4  -8    5.55    0.39
  -3  -4   8    7.72    0.57
   3  -4  -8    7.19    0.67
  -3   4   8    7.14    0.57
   3   4  -8    8.41    0.54
   3   4  -8    8.26    0.49
   3   4  -8    7.58    0.60
   2  -4  -8    2.64    0.46
   2  -4  -8    3.71    0.48
  -2  -4   8    3.20    0.41
   2   4  -8    2.23    0.37
   2   4  -8    3.01    0.38
  -2   4   8    2.79    0.43
   2   4  -8    3.68    0.45
   1  -4  -8    6.39    0.58
   1  -4  -8    6.90    0.69
  -1   4   8    6.66    0.50
   1   4  -8    7.10    0.53
   1   4  -8    6.23    0.47
   1   4  -8    6.88    0.56
   0  -4  -8   12.14    0.77
   0  -4  -8   11.87    0.63
   0   4  -8   12.72    0.71
   0   4   8   12.94    0.63
   0   4  -8   12.84    0.75
   0   4  -8   12.59    0.54
  -1  -4  -8    0.75    0.30
  -1  -4  -8    0.69    0.24
  -1   4  -8    0.23    0.24
  -1   4  -8    0.47    0.16
  -1   4  -8    0.66    0.29
  -2  -4  -8    2.44    0.45
  -2  -4  -8    4.55    0.43
  -2   4  -8    4.13    0.60
  -2   4  -8    3.71    0.50
  -3  -4  -8   13.61    0.60
  -3  -4  -8   13.76    0.89
  -3   4  -8   14.73    0.94
  -3   4  -8   13.40    0.87
  -4  -4  -8    0.39    0.30
  -4  -4  -8    0.22    0.20
  -4   4  -8    0.03    0.27
  -4   4  -8    0.57    0.33
  -5  -4  -8   -0.14    0.24
  -5  -4  -8    0.16    0.20
  -5   4  -8    0.56    0.34
  -5   4  -8   -0.23    0.27
  -6  -4  -8    1.20    0.42
  -6   4  -8    1.33    0.48
  -6   4  -8    0.85    0.42
  -7  -4  -8   28.38    1.41
  -7   4  -8   28.54    1.49
  -7   4  -8   27.50    1.52
  -8   4  -8    5.20    0.84
  -8   4  -8    5.52    0.87
 -10  -5   8    7.52    1.00
  10  -5  -8    6.50    1.00
  10   5  -8    8.56    1.09
 -10   5   8    7.27    1.02
   9  -5  -8    0.64    0.49
  -9  -5   8    0.84    0.45
  -9   5   8    1.04    0.46
   9   5  -8    0.02    0.45
  -8  -5   8    0.90    0.45
   8  -5  -8    0.40    0.41
   8   5  -8    0.40    0.43
  -8   5   8    0.19    0.36
  -7  -5   8   -0.08    0.30
   7  -5  -8   -0.29    0.29
   7   5  -8    0.37    0.37
  -7   5   8    0.33    0.33
  -6  -5   8   26.26    1.25
   6  -5  -8   26.48    1.30
  -6   5   8   28.87    1.32
   6   5  -8   29.01    1.32
  -5  -5   8   14.87    0.88
   5  -5  -8   15.28    0.97
   5   5  -8   14.73    0.91
  -4  -5   8   73.55    1.92
   4  -5  -8   71.67    2.00
   4   5  -8   75.64    1.99
   4   5  -8   72.72    1.57
  -4   5   8   74.33    2.01
   4   5  -8   72.31    1.63
   3  -5  -8   30.50    1.18
  -3  -5   8   31.45    1.13
   3   5  -8   34.74    1.08
  -3   5   8   31.96    1.19
   3   5  -8   31.40    1.16
   3   5  -8   31.82    1.00
  -2  -5   8   38.79    1.18
   2  -5  -8   37.33    1.26
   2   5  -8   37.65    1.15
   2   5  -8   38.19    1.20
   2   5  -8   37.08    1.19
  -2   5   8   36.80    1.24
   1  -5  -8    7.31    0.56
   1  -5  -8    5.74    0.66
   1   5  -8    6.59    0.49
   1   5  -8    7.08    0.63
  -1   5   8    6.37    0.52
   1   5  -8    6.72    0.56
   0  -5  -8   26.42    0.97
   0  -5  -8   25.99    1.13
   0   5  -8   26.26    1.09
   0   5   8   27.15    0.96
   0   5  -8   26.88    1.06
   0   5  -8   27.69    0.84
  -1  -5  -8   31.10    1.28
  -1  -5  -8   32.02    1.04
  -1   5  -8   32.48    1.23
  -1   5  -8   31.40    0.80
  -1   5  -8   32.85    1.26
  -2  -5  -8   28.10    0.96
  -2  -5  -8   28.84    1.23
  -2   5  -8   26.48    1.16
  -2   5  -8   29.54    1.29
  -3  -5  -8   13.05    0.84
  -3  -5  -8   12.83    0.64
  -3   5  -8   12.89    0.87
  -3   5  -8   12.77    0.89
  -4  -5  -8   10.46    0.59
  -4  -5  -8    9.75    0.77
  -4   5  -8    9.09    0.93
  -4   5  -8    9.89    0.94
  -5  -5  -8    0.70    0.27
  -5  -5  -8    1.63    0.45
  -5   5  -8    0.61    0.37
  -5   5  -8    0.63    0.34
  -6  -5  -8    3.51    0.60
  -6   5  -8    3.08    0.62
  -6   5  -8    2.92    0.63
  -7  -5  -8   -0.22    0.27
  -7   5  -8    0.52    0.38
  -7   5  -8   -0.31    0.32
  -8   5  -8    9.92    1.18
  -8   5  -8    8.47    1.03
  10  -6  -8    0.39    0.53
 -10  -6   8    0.23    0.43
 -10   6   8    0.44    0.46
  10   6  -8    0.34    0.56
  -9  -6   8    0.87    0.46
   9  -6  -8    1.64    0.54
  -9   6   8    1.14    0.46
   9   6  -8    0.97    0.51
   8  -6  -8   -0.23    0.36
  -8  -6   8   -0.19    0.30
   8   6  -8    0.04    0.42
  -8   6   8    0.03    0.35
  -7  -6   8    1.25    0.41
   7  -6  -8    1.94    0.50
  -7   6   8    1.02    0.38
   7   6  -8    1.61    0.50
  -6  -6   8   12.11    0.91
   6  -6  -8   13.13    0.94
   6   6  -8   13.94    1.00
  -6   6   8   14.29    0.95
   5  -6  -8    0.24    0.32
  -5  -6   8    0.73    0.34
   5   6  -8    0.20    0.33
  -5   6   8    0.61    0.31
  -4  -6   8    6.79    0.70
   4  -6  -8    6.10    0.70
   4   6  -8    5.81    0.66
  -4   6   8    7.20    0.77
  -3  -6   8   42.89    1.38
   3  -6  -8   42.34    1.47
   3   6  -8   40.50    1.38
  -3   6   8   46.19    1.50
   3   6  -8   43.02    1.23
  -2  -6   8    3.01    0.43
   2  -6  -8    3.46    0.51
  -2   6   8    2.85    0.47
   2   6  -8    2.87    0.42
   2   6  -8    2.94    0.41
   2   6  -8    2.94    0.44
   1  -6  -8    0.58    0.29
   1  -6  -8    1.10    0.35
  -1   6   8    0.45    0.25
   1   6  -8    0.46    0.25
   1   6  -8    0.80    0.26
   1   6  -8    0.21    0.23
   0  -6  -8    2.03    0.40
   0  -6  -8    2.64    0.46
   0   6  -8    2.35    0.41
   0   6  -8    2.85    0.44
   0   6  -8    2.71    0.36
   0   6   8    3.39    0.46
  -1  -6  -8   42.69    1.50
  -1  -6  -8   44.18    1.33
  -1   6  -8   43.64    1.04
  -1   6  -8   43.43    1.50
  -1   6  -8   41.92    1.45
  -2  -6  -8  159.50    3.01
  -2  -6  -8  160.41    3.42
  -2   6  -8  167.56    3.52
  -2   6  -8  166.35    2.47
  -2   6  -8  167.53    3.44
  -3  -6  -8    0.45    0.32
  -3  -6  -8    1.44    0.31
  -3   6  -8    0.77    0.36
  -3   6  -8    0.30    0.29
  -4  -6  -8    4.82    0.51
  -4  -6  -8    3.27    0.57
  -4   6  -8    5.47    0.78
  -4   6  -8    3.44    0.58
  -5  -6  -8    7.09    0.61
  -5  -6  -8    6.58    0.75
  -5   6  -8    6.19    0.79
  -5   6  -8    5.55    0.76
  -6  -6  -8    2.13    0.37
  -6  -6  -8    2.08    0.48
  -6   6  -8    2.09    0.53
  -6   6  -8    2.44    0.60
  -7   6  -8    0.90    0.49
  -7   6  -8    1.43    0.51
  -8   6  -8   15.29    1.24
 -10  -7   8    1.26    0.59
  10  -7  -8    1.64    0.63
 -10   7   8    1.78    0.62
  10   7  -8    0.74    0.60
  -9  -7   8    2.07    0.64
   9  -7  -8    1.10    0.50
   9   7  -8    1.23    0.63
  -9   7   8    0.81    0.43
   8  -7  -8    9.55    1.08
  -8  -7   8    9.08    1.08
   8   7  -8    8.03    1.03
  -8   7   8    9.66    1.07
   7  -7  -8   -0.14    0.37
  -7  -7   8    0.95    0.45
   7   7  -8   -0.04    0.40
  -7   7   8    0.49    0.38
  -6  -7   8   15.85    1.05
   6  -7  -8   18.30    1.11
   6   7  -8   17.52    1.13
  -5  -7   8    4.35    0.65
   5  -7  -8    5.33    0.71
   5   7  -8    3.60    0.60
  -5   7   8    3.22    0.57
   4  -7  -8   10.42    0.80
  -4  -7   8   10.79    0.76
  -4   7   8    9.70    0.78
   4   7  -8   10.70    0.81
  -3  -7   8    2.83    0.45
   3  -7  -8    3.73    0.56
  -3   7   8    4.71    0.61
   3   7  -8    2.95    0.49
   3   7  -8    3.79    0.43
   2  -7  -8   13.34    0.82
   2   7  -8   15.41    0.82
  -2   7   8   13.52    0.82
   2   7  -8   13.48    0.73
   1  -7  -8   15.92    0.94
   1  -7  -8   14.58    0.84
  -1   7   8   15.06    0.83
   1   7  -8   13.20    0.76
   1   7  -8   13.39    0.74
   1   7  -8   14.09    0.80
   0  -7  -8   18.49    1.02
   0  -7  -8   19.97    0.95
   0   7  -8   19.81    0.98
   0   7  -8   18.40    0.79
   0   7   8   18.41    0.90
   0   7  -8   19.82    0.98
  -1  -7  -8  153.43    3.30
  -1  -7  -8  152.75    3.03
  -1   7  -8  154.45    3.23
  -1   7  -8  153.93    3.27
  -1   7  -8  151.58    2.63
  -2  -7  -8   17.12    0.98
  -2  -7  -8   18.82    0.89
  -2   7  -8   18.97    0.62
  -2   7  -8   19.51    1.05
  -2   7  -8   17.85    1.01
  -3  -7  -8    0.16    0.27
  -3  -7  -8    0.46    0.27
  -3   7  -8    0.35    0.32
  -3   7  -8    0.30    0.29
  -4  -7  -8    0.70    0.35
  -4  -7  -8    0.80    0.31
  -4   7  -8    0.96    0.41
  -4   7  -8    0.46    0.34
  -5  -7  -8    0.64    0.35
  -5  -7  -8    1.33    0.36
  -5   7  -8    0.73    0.44
  -5   7  -8   -0.08    0.34
  -6  -7  -8    1.49    0.38
  -6  -7  -8    1.76    0.46
  -6   7  -8    2.54    0.65
  -6   7  -8    2.58    0.63
  -7   7  -8   -0.37    0.35
  -8   7  -8    4.55    0.84
  10  -8  -8    0.23    0.50
 -10  -8   8    0.10    0.45
  10   8  -8    0.59    0.60
 -10   8   8   -0.01    0.43
   9  -8  -8    2.76    0.72
  -9  -8   8    1.50    0.54
   9   8  -8    2.82    0.70
  -9   8   8    1.39    0.57
  -8  -8   8    0.38    0.44
   8  -8  -8    0.35    0.44
  -8   8   8    0.82    0.44
   8   8  -8    0.37    0.50
  -7  -8   8   13.80    1.04
   7  -8  -8   14.09    1.28
   7   8  -8   13.62    1.08
  -7   8   8   12.70    1.03
   6  -8  -8    0.67    0.40
  -6  -8   8    0.42    0.37
   6   8  -8    0.19    0.42
  -6   8   8    0.46    0.36
   5  -8  -8    3.90    0.67
  -5  -8   8    3.78    0.59
   5   8  -8    3.91    0.64
  -5   8   8    3.53    0.62
  -4  -8   8    2.20    0.44
   4  -8  -8    2.19    0.50
  -4   8   8    1.96    0.44
   4   8  -8    2.37    0.49
   3  -8  -8    7.81    0.78
  -3  -8   8    9.29    0.83
  -3   8   8    7.82    0.78
   3   8  -8    9.10    0.75
   2  -8  -8    8.36    0.69
   2   8  -8    8.75    0.71
  -2   8   8    9.42    0.73
   2   8  -8    8.89    0.60
   1  -8  -8    4.22    0.57
   1   8  -8    3.95    0.51
  -1   8   8    5.56    0.64
   1   8  -8    4.61    0.57
   1   8  -8    5.42    0.57
   0  -8  -8    5.52    0.62
   0  -8  -8    5.43    0.66
   0   8  -8    5.81    0.66
   0   8  -8    5.24    0.53
   0   8  -8    4.01    0.55
   0   8   8    6.38    0.68
  -1  -8  -8   15.67    0.95
  -1  -8  -8   16.30    0.89
  -1   8  -8   14.66    0.92
  -1   8  -8   15.06    0.93
  -1   8  -8   15.12    0.70
  -2  -8  -8    2.55    0.49
  -2  -8  -8    2.53    0.45
  -2   8  -8    1.32    0.41
  -2   8  -8    3.00    0.55
  -2   8  -8    2.84    0.34
  -3  -8  -8   10.06    0.74
  -3  -8  -8   10.74    0.82
  -3   8  -8   10.76    0.85
  -3   8  -8    9.06    0.92
  -4  -8  -8    0.01    0.26
  -4  -8  -8   -0.31    0.23
  -4   8  -8   -0.30    0.28
  -4   8  -8    0.39    0.36
  -5  -8  -8    3.98    0.62
  -5  -8  -8    5.17    0.63
  -5   8  -8    4.70    0.77
  -5   8  -8    3.73    0.73
  -6  -8  -8    5.52    0.64
  -6   8  -8    6.40    0.92
  -7   8  -8    6.90    0.92
  -9  -9   8    1.71    0.57
   9  -9  -8    1.75    0.66
  -9   9   8    2.35    0.69
   9   9  -8    0.88    0.61
   8  -9  -8    8.53    1.07
  -8  -9   8    7.14    0.93
   8   9  -8    7.63    0.99
  -8   9   8    7.51    0.98
   7  -9  -8   -0.10    0.34
  -7  -9   8   -0.06    0.30
   7   9  -8    0.01    0.40
   6  -9  -8    6.70    0.87
  -6  -9   8    5.91    0.78
  -6   9   8    5.78    0.79
   6   9  -8    6.08    0.80
   5  -9  -8    1.16    0.45
  -5  -9   8    1.11    0.42
  -5   9   8    1.15    0.43
   5   9  -8    2.73    0.59
   4  -9  -8    4.96    0.73
  -4  -9   8    3.18    0.55
  -4   9   8    4.73    0.71
   4   9  -8    3.28    0.60
   3  -9  -8    5.26    0.69
  -3  -9   8    5.80    0.66
   3   9  -8    5.34    0.65
  -3   9   8    5.12    0.66
   2  -9  -8   22.95    1.14
   2   9  -8   24.27    0.97
   2   9  -8   21.56    1.06
  -2   9   8   23.55    1.15
   1  -9  -8   27.08    1.23
   1   9  -8   26.15    1.10
  -1   9   8   25.70    1.18
   1   9  -8   25.51    1.08
   0  -9  -8   24.78    1.22
   0  -9  -8   21.88    1.11
   0   9  -8   25.30    1.02
   0   9   8   24.32    1.12
   0   9  -8   25.44    1.19
   0   9  -8   22.77    1.09
  -1  -9  -8   12.44    0.83
  -1  -9  -8   11.35    0.85
  -1   9  -8   10.82    0.64
  -1   9  -8   13.77    0.90
  -1   9  -8   11.60    0.86
  -2  -9  -8    1.15    0.40
  -2  -9  -8    1.40    0.41
  -2   9  -8    0.99    0.38
  -2   9  -8    1.52    0.31
  -2   9  -8    1.57    0.43
  -3  -9  -8    0.34    0.30
  -3  -9  -8    0.21    0.30
  -3   9  -8    0.23    0.32
  -3   9  -8   -0.16    0.23
  -4  -9  -8    0.23    0.28
  -4  -9  -8   -0.28    0.27
  -4   9  -8   -0.20    0.30
  -4   9  -8    0.03    0.34
  -5  -9  -8    2.71    0.52
  -5  -9  -8    2.90    0.55
  -5   9  -8    2.89    0.61
  -6  -9  -8    1.63    0.42
  -6   9  -8    0.97    0.53
  -7  -9  -8    1.96    0.49
  -7   9  -8    1.79    0.60
   9 -10  -8    0.75    0.48
  -9 -10   8    0.28    0.46
   9  10  -8    0.33    0.56
  -9  10   8    0.78    0.48
  -8 -10   8    3.26    0.76
   8 -10  -8    4.49    0.85
   8  10  -8    3.16    0.79
  -8  10   8    2.63    0.66
   7 -10  -8   -0.12    0.37
  -7 -10   8    0.51    0.40
  -7  10   8   -0.01    0.38
   7  10  -8    0.25    0.49
   6 -10  -8    1.24    0.49
  -6 -10   8    1.49    0.53
  -6  10   8    1.08    0.44
   6  10  -8    1.21    0.53
  -5 -10   8    2.54    0.56
   5 -10  -8    3.47    0.70
   5  10  -8    2.44    0.60
  -4 -10   8    1.77    0.45
   4 -10  -8    0.96    0.42
  -4  10   8    1.11    0.44
   4  10  -8    1.64    0.47
   3 -10  -8    0.31    0.38
   3  10  -8    0.68    0.39
  -3  10   8    0.55    0.37
   2 -10  -8    2.84    0.54
  -2  10   8    3.58    0.59
   2  10  -8    3.38    0.57
   1 -10  -8   -0.17    0.29
  -1  10   8   -0.11    0.27
   1  10  -8   -0.19    0.21
   1  10  -8    0.18    0.30
   0 -10  -8    7.19    0.80
   0 -10  -8    7.61    0.85
   0  10  -8    5.65    0.60
   0  10  -8    8.27    0.79
   0  10   8    6.64    0.73
  -1 -10  -8    0.30    0.32
  -1 -10  -8   -0.04    0.30
  -1  10  -8    0.41    0.33
  -1  10  -8   -0.09    0.30
  -1  10  -8    0.42    0.27
  -2 -10  -8    0.45    0.33
  -2 -10  -8    0.76    0.39
  -2  10  -8    0.94    0.30
  -2  10  -8    1.04    0.42
  -2  10  -8    1.13    0.45
  -3 -10  -8   11.63    0.88
  -3 -10  -8   11.83    0.88
  -3  10  -8   12.32    1.14
  -4 -10  -8    0.30    0.30
  -4 -10  -8    0.01    0.31
  -4  10  -8    0.09    0.35
  -5 -10  -8    3.97    0.65
  -5  10  -8    3.75    0.72
  -6 -10  -8    0.66    0.37
  -6  10  -8    0.44    0.48
   8 -11  -8    1.13    0.60
  -8 -11   8    0.49    0.46
   8  11  -8    0.53    0.57
  -7 -11   8    0.09    0.40
   7 -11  -8    0.84    0.54
  -7  11   8   -0.45    0.37
   7  11  -8    0.66    0.57
   6 -11  -8    0.98    0.48
  -6 -11   8    0.69    0.44
  -6  11   8    0.67    0.42
   6  11  -8   -0.11    0.40
  -5 -11   8    6.72    0.86
   5 -11  -8    5.15    0.82
  -5  11   8    5.06    0.82
   5  11  -8    4.94    0.80
  -4 -11   8    0.34    0.37
   4 -11  -8    0.20    0.39
  -4  11   8   -0.11    0.35
   4  11  -8   -0.51    0.33
   3 -11  -8    2.49    0.55
   3  11  -8    3.37    0.62
  -3  11   8    4.01    0.67
   2 -11  -8    0.71    0.42
  -2  11   8    0.15    0.29
   2  11  -8    0.52    0.38
   1 -11  -8    1.61    0.46
  -1  11   8    1.70    0.47
   1  11  -8    1.44    0.42
   0 -11  -8   -0.06    0.29
   0 -11  -8   -0.03    0.28
   0  11   8   -0.03    0.28
   0  11  -8    0.11    0.29
  -1 -11  -8   21.79    1.20
  -1 -11  -8   21.98    1.20
  -1  11  -8   22.47    1.24
  -1  11  -8   21.61    0.99
  -2 -11  -8    7.91    0.87
  -2 -11  -8    8.20    0.86
  -2  11  -8    7.12    0.65
  -2  11  -8    8.37    0.91
  -3 -11  -8   10.57    0.99
  -3 -11  -8   10.25    1.00
  -3  11  -8    9.04    0.99
  -4 -11  -8    3.58    0.64
  -4  11  -8    3.45    0.70
  -5 -11  -8    2.40    0.58
  -5  11  -8    3.36    0.73
  -6 -11  -8    5.83    0.80
  -6  11  -8    4.80    0.85
  -7 -12   8    4.30    0.84
   7 -12  -8    3.83    0.85
   7  12  -8    5.73    0.99
  -7  12   8    4.35    0.89
  -6 -12   8    0.54    0.44
   6 -12  -8    0.88    0.53
  -6  12   8    1.46    0.55
   6  12  -8   -0.10    0.50
   5 -12  -8   15.00    1.18
  -5 -12   8   10.79    1.07
  -5  12   8   13.09    1.30
   5  12  -8   10.40    1.08
   4 -12  -8    1.05    0.50
   4  12  -8    1.45    0.49
  -4  12   8    0.12    0.33
   3 -12  -8    8.91    0.97
   3  12  -8    7.90    0.92
  -3  12   8    7.94    0.90
   2 -12  -8    1.78    0.53
   2  12  -8    1.20    0.46
  -2  12   8    1.26    0.49
   1 -12  -8    0.07    0.38
   1  12  -8    0.28    0.34
  -1  12   8   -0.19    0.29
   0 -12  -8    2.85    0.62
   0 -12  -8    2.68    0.56
   0  12   8    3.00    0.61
   0  12  -8    2.16    0.48
  -1 -12  -8    0.27    0.30
  -1 -12  -8   -0.16    0.33
  -1  12  -8    0.34    0.30
  -1  12  -8    0.30    0.34
  -2 -12  -8    0.72    0.39
  -2 -12  -8    0.97    0.45
  -2  12  -8    2.03    0.51
  -2  12  -8    1.23    0.38
  -3 -12  -8    0.05    0.29
  -3 -12  -8    0.05    0.37
  -3  12  -8   -0.48    0.31
  -4 -12  -8    5.77    0.82
  -4  12  -8    3.02    0.67
  -5 -12  -8   -0.35    0.36
  -5  12  -8   -0.34    0.38
  -7 -13   8    3.18    0.76
   7 -13  -8    2.66    0.76
   7  13  -8    2.67    0.82
  -7  13   8    5.25    0.97
  -6 -13   8    0.11    0.37
   6 -13  -8   -0.01    0.47
   6  13  -8   -0.02    0.50
  -6  13   8    0.24    0.49
   5 -13  -8    4.16    0.84
   5  13  -8    3.76    0.79
  -5  13   8    5.56    0.91
   4 -13  -8    8.39    1.08
  -4  13   8    6.89    1.00
   4  13  -8    6.16    0.91
   3 -13  -8    4.91    0.81
   3  13  -8    3.30    0.66
  -3  13   8    4.58    0.78
   2 -13  -8   15.16    1.16
  -2  13   8   13.91    1.10
   2  13  -8   14.94    1.08
   1 -13  -8    0.92    0.45
  -1  13   8    1.58    0.52
   1  13  -8    1.69    0.50
   0 -13  -8    2.22    0.61
   0 -13  -8    2.24    0.57
   0  13   8    2.56    0.61
   0  13  -8    2.06    0.51
  -1 -13  -8    0.63    0.45
  -1 -13  -8    0.41    0.37
  -1  13  -8    0.12    0.36
  -1  13  -8    0.31    0.32
  -2 -13  -8    0.86    0.48
  -2 -13  -8    1.37    0.45
  -2  13  -8    0.60    0.41
  -2  13  -8    1.62    0.43
  -3 -13  -8   -0.42    0.37
  -3  13  -8    0.46    0.45
  -3  13  -8    0.62    0.36
  -4 -13  -8    1.79    0.57
  -4  13  -8    1.60    0.62
   6 -14  -8    0.85    0.58
  -6 -14   8    0.22    0.41
  -6  14   8    0.81    0.55
   6  14  -8    0.21    0.55
   5 -14  -8    1.77    0.64
  -5  14   8    1.89    0.60
   5  14  -8    2.43    0.72
   4 -14  -8   -0.02    0.48
   4  14  -8    0.22    0.47
  -4  14   8   -0.26    0.41
   3 -14  -8    0.54    0.48
  -3  14   8    0.58    0.42
   3  14  -8    0.14    0.42
   2 -14  -8    6.04    0.94
   2  14  -8    5.82    0.81
  -2  14   8    5.49    0.87
   1 -14  -8    4.18    0.77
   1  14  -8    6.66    0.85
  -1  14   8    5.31    0.81
   0 -14  -8    4.68    0.78
   0 -14  -8    3.52    0.74
   0  14  -8    3.55    0.65
  -1 -14  -8    0.34    0.38
  -1 -14  -8    0.15    0.42
  -1  14  -8   -0.43    0.28
  -2 -14  -8    0.22    0.41
  -2 -14  -8    0.22    0.34
  -2  14  -8   -0.03    0.31
  -2  14  -8    0.22    0.38
  -3 -14  -8    0.15    0.43
  -3  14  -8   -0.04    0.35
   4 -15  -8    1.66    0.67
   4  15  -8    1.00    0.52
  -4  15   8    0.96    0.58
   3 -15  -8    3.49    0.85
  -3  15   8    2.69    0.74
   3  15  -8    3.12    0.73
   2 -15  -8    0.25    0.53
   2  15  -8    0.67    0.52
  -2  15   8    0.26    0.45
   1 -15  -8   -0.02    0.43
   1  15  -8   -0.24    0.35
  -1  15   8   -0.24    0.38
   0 -15  -8    1.64    0.60
   0 -15  -8    0.75    0.47
   0  15  -8    1.55    0.52
  -1 -15  -8    1.10    0.59
  -1 -15  -8    0.84    0.45
  -1  15  -8    1.11    0.47
  -2 -15  -8    1.30    0.59
  -2  15  -8    0.74    0.47
  -2  15  -8    1.28    0.46
   2 -16  -8    0.12    0.46
   2  16  -8   -0.04    0.42
  -2  16   8    0.18    0.43
   1 -16  -8    2.51    0.75
   1  16  -8    3.95    0.78
  -1  16   8    3.32    0.77
   0 -16  -8    0.62    0.45
   0 -16  -8   -0.07    0.42
   0  16  -8    0.34    0.43
 -11   0   9   18.43    1.42
  11   0  -9   21.64    1.57
 -10   0   9    0.04    0.36
  10   0  -9    0.13    0.46
  -9   0   9    2.20    0.59
   9   0  -9    1.56    0.58
  -8   0   9   -0.14    0.31
   8   0  -9   -0.36    0.35
  -7   0   9   33.83    1.47
   7   0  -9   32.07    1.25
   7   0  -9   35.31    1.56
   6   0  -9    0.01    0.34
   6   0  -9    0.26    0.26
  -6   0   9    0.31    0.32
   5   0  -9  364.84    5.88
   5   0  -9  359.85    6.06
  -5   0   9  367.55    6.03
   4   0  -9    0.23    0.30
  -4   0   9    1.00    0.30
   4   0  -9    0.29    0.25
   3   0  -9    1.18    0.34
   3   0  -9    0.76    0.29
  -3   0   9    1.09    0.29
   3   0  -9    1.18    0.24
  -2   0   9   -0.04    0.17
   2   0  -9   -0.08    0.19
   2   0  -9   -0.03    0.16
   2   0  -9    0.02    0.20
   1   0  -9   24.24    0.90
   1   0  -9   26.03    1.11
   1   0  -9   24.35    0.85
   0   0  -9    0.02    0.21
   0   0  -9    0.11    0.19
   0   0  -9   -0.06    0.15
  -1   0  -9   24.68    1.04
  -1   0  -9   25.60    0.65
  -1   0  -9   24.46    1.14
  -2   0  -9   -0.19    0.23
  -2   0  -9   -0.35    0.19
  -3   0  -9    4.13    0.65
  -3   0  -9    3.72    0.59
  -4   0  -9   -0.20    0.25
  -4   0  -9   -0.55    0.17
  -5   0  -9   -0.11    0.26
  -5   0  -9   -0.20    0.29
  -6   0  -9    0.30    0.38
  -6   0  -9    0.28    0.41
  -7   0  -9    6.86    0.94
  -7   0  -9    5.90    0.88
  -8   0  -9    0.32    0.40
  11  -1  -9    7.97    1.16
 -11  -1   9    7.09    1.03
 -11   1   9    6.18    1.00
  11   1  -9    5.64    1.02
 -10  -1   9    0.20    0.38
  10  -1  -9   -0.29    0.41
  10   1  -9    0.85    0.57
 -10   1   9   -0.07    0.40
   9  -1  -9    1.35    0.59
  -9  -1   9    0.84    0.42
   9   1  -9    1.37    0.52
  -9   1   9    2.12    0.60
  -8  -1   9   -0.03    0.33
   8  -1  -9    0.04    0.35
   8   1  -9    0.43    0.44
  -8   1   9   -0.25    0.25
  -7  -1   9    1.05    0.42
   7  -1  -9    0.33    0.41
  -7   1   9    0.16    0.32
   7   1  -9    0.46    0.39
  -6  -1   9   76.57    2.17
   6  -1  -9   71.61    2.16
   6   1  -9   74.03    1.87
   6   1  -9   74.66    2.17
  -6   1   9   73.14    2.14
  -5  -1   9   18.62    0.99
   5  -1  -9   21.98    1.09
   5  -1  -9   23.27    1.06
  -5   1   9   21.11    1.04
   5   1  -9   23.39    1.14
   5   1  -9   22.64    0.98
   4  -1  -9   84.11    2.13
   4  -1  -9   86.13    2.15
  -4  -1   9   83.97    2.08
  -4   1   9   86.48    2.13
   4   1  -9   91.32    2.10
   4   1  -9   90.86    2.19
   3  -1  -9   37.79    1.34
  -3  -1   9   38.50    1.22
   3  -1  -9   40.11    1.29
  -3   1   9   37.84    1.24
   3   1  -9   40.83    1.34
   3   1  -9   38.08    1.26
   3   1  -9   36.17    0.97
   2  -1  -9    2.62    0.40
   2  -1  -9    2.79    0.47
  -2  -1   9    2.62    0.37
   2   1  -9    2.70    0.43
   2   1  -9    3.09    0.42
  -2   1   9    3.48    0.42
   2   1  -9    3.20    0.38
   1  -1  -9    0.12    0.19
   1  -1  -9    0.24    0.21
   1  -1  -9    0.13    0.24
   1   1  -9    0.38    0.25
   1   1  -9    0.13    0.20
   1   1  -9    0.18    0.18
   0  -1  -9   11.95    0.81
   0  -1  -9   14.19    0.58
   0  -1  -9   12.87    0.71
   0   1  -9   13.61    0.82
   0   1  -9   14.04    0.55
   0   1  -9   12.18    0.71
  -1  -1  -9   30.21    0.77
  -1  -1  -9   29.80    1.14
  -1  -1  -9   32.07    1.31
  -1   1  -9   26.49    1.19
  -1   1  -9   30.60    0.67
  -1   1  -9   30.26    1.16
  -2  -1  -9   19.51    0.98
  -2  -1  -9   18.82    1.03
  -2  -1  -9   19.68    0.48
  -2   1  -9   17.90    1.01
  -2   1  -9   19.66    0.99
  -3  -1  -9   93.26    2.49
  -3  -1  -9   91.27    2.38
  -3   1  -9   92.64    2.50
  -3   1  -9   92.40    2.37
  -4  -1  -9   28.56    1.34
  -4  -1  -9   30.79    1.40
  -4   1  -9   28.54    1.36
  -4   1  -9   28.17    1.32
  -5  -1  -9    0.64    0.36
  -5  -1  -9    0.26    0.30
  -5   1  -9    0.48    0.33
  -5   1  -9    0.15    0.34
  -6  -1  -9   -0.45    0.25
  -6   1  -9   -0.11    0.33
  -6   1  -9    0.17    0.34
  -7  -1  -9    1.78    0.57
  -7   1  -9    1.65    0.54
  -7   1  -9    1.37    0.54
  -8  -1  -9    2.63    0.65
  -8   1  -9    2.73    0.69
  -8   1  -9    3.61    0.77
 -10  -2   9    5.20    0.91
  10  -2  -9    3.77    0.80
 -10   2   9    4.11    0.80
  10   2  -9    5.44    0.91
  -9  -2   9    2.63    0.61
   9  -2  -9    2.36    0.62
   9   2  -9    2.97    0.68
  -9   2   9    2.92    0.62
  -8  -2   9    2.31    0.57
   8  -2  -9    1.91    0.56
  -8   2   9    2.95    0.64
   8   2  -9    1.87    0.58
  -7  -2   9   13.92    0.96
   7  -2  -9   14.18    1.06
   7   2  -9   12.73    0.97
  -7   2   9   12.58    0.97
  -6  -2   9   54.74    1.80
   6  -2  -9   50.41    1.77
   6   2  -9   50.80    1.79
   6   2  -9   49.73    1.44
  -6   2   9   50.29    1.75
   5  -2  -9    1.49    0.43
  -5  -2   9    1.35    0.39
   5   2  -9    1.02    0.40
  -5   2   9    1.10    0.38
   5   2  -9    1.66    0.36
   4  -2  -9   11.37    0.76
  -4  -2   9   10.99    0.72
   4  -2  -9   11.36    0.79
   4   2  -9   11.20    0.55
   4   2  -9   13.30    0.74
   4   2  -9   12.30    0.78
  -4   2   9   12.04    0.77
   3  -2  -9    5.59    0.64
   3  -2  -9    5.77    0.61
  -3  -2   9    4.19    0.48
   3   2  -9    4.54    0.52
   3   2  -9    3.97    0.49
   3   2  -9    5.42    0.41
  -3   2   9    4.65    0.54
   2  -2  -9   17.97    0.94
   2  -2  -9   17.88    0.83
  -2  -2   9   16.00    0.72
   2   2  -9   17.62    0.74
  -2   2   9   18.98    0.80
   2   2  -9   16.57    0.77
   2   2  -9   17.32    0.87
   1  -2  -9    5.53    0.46
   1  -2  -9    5.38    0.64
   1   2  -9    5.50    0.43
   1   2  -9    5.24    0.61
   1   2  -9    5.72    0.55
   0  -2  -9    6.13    0.71
   0  -2  -9    4.33    0.41
   0   2  -9    6.00    0.60
   0   2  -9    4.49    0.58
   0   2  -9    4.44    0.35
  -1  -2  -9    6.10    0.39
  -1  -2  -9    4.72    0.60
  -1   2  -9    6.58    0.65
  -1   2  -9    4.30    0.60
  -1   2  -9    5.46    0.27
  -2  -2  -9   40.13    0.88
  -2  -2  -9   38.63    1.49
  -2   2  -9   38.53    1.49
  -2   2  -9   38.86    1.41
  -3  -2  -9   10.79    0.85
  -3   2  -9   11.01    0.85
  -3   2  -9   11.17    0.81
  -4  -2  -9   96.36    2.60
  -4   2  -9   96.15    2.64
  -4   2  -9   92.41    2.50
  -5  -2  -9    0.37    0.35
  -5   2  -9    0.00    0.27
  -5   2  -9   -0.10    0.30
  -6  -2  -9    0.13    0.32
  -6   2  -9    0.21    0.32
  -6   2  -9    0.44    0.40
  -7  -2  -9    1.91    0.54
  -7   2  -9    1.24    0.52
  -7   2  -9    1.39    0.52
  -8  -2  -9    1.48    0.54
  -8   2  -9    1.46    0.54
  -8   2  -9    1.10    0.58
 -10  -3   9    1.43    0.56
  10  -3  -9    0.98    0.61
  10   3  -9    2.75    0.74
 -10   3   9    0.55    0.49
  -9  -3   9    3.41    0.70
   9  -3  -9    4.93    0.85
   9   3  -9    4.21    0.80
  -9   3   9    5.01    0.84
   8  -3  -9    1.26    0.53
  -8  -3   9    1.21    0.49
   8   3  -9    0.67    0.50
  -8   3   9    0.69    0.42
   7  -3  -9    6.41    0.81
  -7  -3   9    4.14    0.63
   7   3  -9    4.12    0.66
  -7   3   9    4.50    0.67
   6  -3  -9    1.83    0.48
  -6  -3   9    1.44    0.43
   6   3  -9    1.11    0.42
  -6   3   9    1.97    0.45
  -5  -3   9    2.89    0.53
   5  -3  -9    1.70    0.43
   5   3  -9    2.50    0.40
   5   3  -9    2.63    0.53
  -5   3   9    2.50    0.50
  -4  -3   9   12.22    0.76
   4  -3  -9   10.46    0.78
   4   3  -9   11.69    0.68
   4   3  -9   12.13    0.79
  -4   3   9   11.49    0.76
   4   3  -9   10.66    0.52
  -3  -3   9   35.64    1.19
   3  -3  -9   34.56    1.24
   3  -3  -9   35.29    1.36
   3   3  -9   36.35    1.23
  -3   3   9   36.45    1.25
   3   3  -9   36.97    1.24
   3   3  -9   36.42    1.04
   2  -3  -9   40.64    1.47
   2  -3  -9   42.24    1.31
   2   3  -9   43.48    1.25
   2   3  -9   42.70    1.37
   2   3  -9   43.87    1.22
   1  -3  -9   -0.18    0.19
   1  -3  -9   -0.14    0.18
   1   3  -9   -0.03    0.23
  -1   3   9   -0.11    0.18
   1   3  -9   -0.10    0.18
   1   3  -9    0.01    0.17
   0  -3  -9    2.73    0.49
   0  -3  -9    3.53    0.40
   0   3  -9    3.57    0.34
   0   3  -9    3.52    0.47
   0   3  -9    2.60    0.46
  -1  -3  -9   45.66    1.16
  -1  -3  -9   46.16    1.61
  -1   3  -9   46.38    1.49
  -1   3  -9   48.41    1.62
  -1   3  -9   48.06    0.89
  -2  -3  -9   60.00    1.30
  -2  -3  -9   60.36    1.90
  -2   3  -9   64.43    1.97
  -2   3  -9   59.08    1.79
  -3  -3  -9   35.28    1.44
  -3  -3  -9   36.24    0.87
  -3   3  -9   36.24    1.43
  -3   3  -9   32.88    1.46
  -4  -3  -9   15.06    0.98
  -4   3  -9   14.93    1.06
  -4   3  -9   16.08    1.02
  -5  -3  -9   -0.15    0.28
  -5   3  -9   -0.13    0.26
  -5   3  -9   -0.11    0.31
  -6  -3  -9    0.63    0.38
  -6   3  -9    1.27    0.49
  -6   3  -9    1.34    0.50
  -7  -3  -9    0.03    0.35
  -7   3  -9   -0.22    0.34
  -7   3  -9    0.28    0.43
  -8  -3  -9    3.20    0.70
  -8   3  -9    2.35    0.66
  -8   3  -9    2.81    0.71
 -10  -4   9   -0.07    0.45
  10  -4  -9   -0.47    0.46
 -10   4   9   -0.06    0.36
  10   4  -9   -0.22    0.48
   9  -4  -9    0.63    0.52
  -9  -4   9    0.22    0.37
   9   4  -9    0.77    0.49
  -9   4   9    0.47    0.43
   8  -4  -9    1.18    0.49
  -8  -4   9    0.91    0.46
   8   4  -9    1.10    0.54
  -8   4   9    0.63    0.37
  -7  -4   9    0.56    0.33
   7  -4  -9    0.10    0.37
   7   4  -9    0.45    0.38
  -7   4   9    0.86    0.39
  -6  -4   9   41.61    1.57
   6  -4  -9   40.55    1.61
   6   4  -9   37.12    1.53
  -6   4   9   44.45    1.65
   5  -4  -9   10.64    0.81
  -5  -4   9   14.32    0.89
  -5   4   9   11.29    0.80
   5   4  -9   12.41    0.87
   5   4  -9   11.59    0.65
  -4  -4   9    1.06    0.33
   4  -4  -9    0.67    0.38
   4   4  -9    0.67    0.34
   4   4  -9    0.94    0.24
  -4   4   9    0.68    0.34
   4   4  -9    0.94    0.28
   3  -4  -9    0.27    0.25
  -3  -4   9   -0.14    0.20
   3  -4  -9    0.29    0.30
   3   4  -9    0.19    0.27
   3   4  -9    0.10    0.18
   3   4  -9    0.24    0.22
   2  -4  -9    3.21    0.49
   2  -4  -9    3.39    0.53
   2   4  -9    3.67    0.44
   2   4  -9    3.64    0.49
   2   4  -9    3.50    0.44
  -2   4   9    3.38    0.47
   1  -4  -9    7.64    0.57
   1  -4  -9    8.05    0.79
   1   4  -9    8.39    0.55
   1   4  -9    8.46    0.60
   1   4  -9    8.21    0.65
  -1   4   9    7.32    0.54
   0  -4  -9   10.80    0.79
   0  -4  -9   11.28    0.64
   0   4  -9   11.54    0.54
   0   4  -9   10.59    0.74
   0   4  -9   11.32    0.73
  -1  -4  -9    0.03    0.19
  -1  -4  -9    0.01    0.22
  -1   4  -9    0.02    0.13
  -1   4  -9    0.17    0.29
  -1   4  -9   -0.06    0.22
  -2  -4  -9   11.57    0.83
  -2  -4  -9   10.77    0.55
  -2   4  -9   12.90    0.92
  -2   4  -9   10.11    0.77
  -3  -4  -9    8.85    0.90
  -3  -4  -9    7.18    0.46
  -3   4  -9    8.60    0.88
  -3   4  -9    7.79    0.81
  -4  -4  -9    2.35    0.52
  -4   4  -9    1.43    0.44
  -4   4  -9    1.98    0.46
  -5  -4  -9    5.75    0.79
  -5   4  -9    4.85    0.74
  -5   4  -9    5.56    0.79
  -6  -4  -9    0.07    0.32
  -6   4  -9    0.43    0.39
  -6   4  -9    0.38    0.38
  -7  -4  -9    5.39    0.80
  -7   4  -9    6.21    0.91
  -7   4  -9    6.66    0.96
  -8   4  -9    2.02    0.62
  -8   4  -9    4.25    0.82
  10  -5  -9    0.08    0.54
 -10  -5   9    0.18    0.40
  10   5  -9   -0.48    0.44
 -10   5   9    0.40    0.46
   9  -5  -9    0.43    0.47
  -9  -5   9    1.00    0.51
   9   5  -9    2.16    0.69
  -9   5   9    1.06    0.49
   8  -5  -9    5.84    0.82
  -8  -5   9    6.25    0.85
  -8   5   9    4.25    0.70
   8   5  -9    5.78    0.87
  -7  -5   9    1.04    0.44
   7  -5  -9    0.74    0.44
   7   5  -9    1.46    0.50
  -7   5   9    1.50    0.48
   6  -5  -9   37.33    1.58
  -6  -5   9   37.13    1.53
   6   5  -9   39.77    1.59
  -6   5   9   39.02    1.57
   5  -5  -9    2.20    0.50
  -5  -5   9    2.27    0.47
   5   5  -9    2.08    0.50
  -5   5   9    2.26    0.51
  -4  -5   9   11.84    0.76
   4  -5  -9   12.26    0.85
   4   5  -9   12.94    0.69
   4   5  -9   11.91    0.61
   4   5  -9   10.89    0.80
  -3  -5   9   17.95    0.87
   3  -5  -9   15.54    0.90
   3   5  -9   17.59    0.82
   3   5  -9   16.06    0.86
   3   5  -9   15.57    0.74
  -3   5   9   17.79    0.93
   2  -5  -9    3.33    0.52
   2  -5  -9    4.83    0.58
   2   5  -9    4.49    0.54
   2   5  -9    5.19    0.53
   2   5  -9    5.93    0.58
  -2   5   9    5.59    0.61
   1  -5  -9    3.15    0.52
   1  -5  -9    3.75    0.49
   1   5  -9    3.21    0.49
   1   5  -9    4.49    0.48
   1   5  -9    4.24    0.52
  -1   5   9    3.97    0.49
   0  -5  -9   21.63    1.10
   0  -5  -9   21.22    0.89
   0   5  -9   20.58    0.74
   0   5  -9   20.00    0.97
   0   5  -9   20.54    1.03
  -1  -5  -9    1.64    0.42
  -1  -5  -9    2.01    0.36
  -1   5  -9    1.94    0.46
  -1   5  -9    2.66    0.27
  -1   5  -9    1.64    0.39
  -2  -5  -9    2.39    0.37
  -2  -5  -9    2.47    0.53
  -2   5  -9    1.56    0.41
  -2   5  -9    1.49    0.41
  -3  -5  -9    2.60    0.53
  -3  -5  -9    2.57    0.37
  -3   5  -9    3.45    0.61
  -3   5  -9    2.68    0.53
  -4  -5  -9    0.39    0.32
  -4  -5  -9    0.28    0.21
  -4   5  -9    0.66    0.40
  -4   5  -9    0.69    0.39
  -5  -5  -9    0.10    0.30
  -5   5  -9    0.01    0.32
  -5   5  -9    1.09    0.44
  -6  -5  -9    0.08    0.29
  -6   5  -9    0.18    0.34
  -6   5  -9    0.21    0.38
  -7  -5  -9    0.98    0.45
  -7   5  -9    0.68    0.48
  -7   5  -9    0.92    0.52
 -10  -6   9    0.76    0.51
  10  -6  -9    0.33    0.54
  10   6  -9    0.33    0.54
 -10   6   9    1.16    0.58
   9  -6  -9    1.24    0.59
  -9  -6   9   -0.13    0.39
  -9   6   9    0.46    0.44
   9   6  -9    0.99    0.54
   8  -6  -9   -0.17    0.41
  -8  -6   9    0.34    0.34
   8   6  -9   -0.42    0.35
  -8   6   9   -0.21    0.32
   7  -6  -9    8.58    0.99
  -7  -6   9    8.49    0.96
  -7   6   9    6.77    0.88
   7   6  -9    9.05    0.99
   6  -6  -9   36.14    1.54
  -6  -6   9   33.04    1.44
   6   6  -9   35.57    1.52
  -6   6   9   34.18    1.50
  -5  -6   9   20.68    1.08
   5  -6  -9   19.21    1.11
   5   6  -9   20.22    1.10
   4  -6  -9    0.22    0.32
  -4  -6   9    0.03    0.24
   4   6  -9    0.55    0.33
  -4   6   9    0.07    0.26
   4   6  -9    0.62    0.24
   3  -6  -9    3.89    0.59
   3   6  -9    2.82    0.49
   3   6  -9    3.34    0.45
  -3   6   9    2.76    0.49
   3   6  -9    3.94    0.47
   2  -6  -9    1.12    0.40
   2  -6  -9    0.75    0.35
  -2   6   9    0.59    0.30
   2   6  -9    1.02    0.30
   2   6  -9    1.14    0.32
   2   6  -9    0.73    0.31
   1  -6  -9    1.36    0.41
   1  -6  -9    1.22    0.35
   1   6  -9    0.79    0.28
  -1   6   9    0.82    0.30
   1   6  -9    1.34    0.36
   1   6  -9    0.43    0.27
   0  -6  -9   -0.06    0.24
   0  -6  -9    0.15    0.25
   0   6  -9    0.10    0.19
   0   6  -9   -0.39    0.20
   0   6  -9    0.18    0.24
  -1  -6  -9   19.01    0.86
  -1  -6  -9   17.78    1.05
  -1   6  -9   15.62    0.98
  -1   6  -9   18.74    1.01
  -1   6  -9   17.95    0.63
  -2  -6  -9   -0.10    0.21
  -2  -6  -9   -0.08    0.26
  -2   6  -9   -0.49    0.19
  -2   6  -9   -0.27    0.25
  -3  -6  -9    5.17    0.71
  -3  -6  -9    4.19    0.48
  -3   6  -9    4.29    0.66
  -3   6  -9    4.22    0.63
  -4  -6  -9   27.50    0.99
  -4  -6  -9   28.09    1.33
  -4   6  -9   26.78    1.35
  -4   6  -9   25.26    1.38
  -5  -6  -9    0.36    0.34
  -5  -6  -9    0.49    0.27
  -5   6  -9    0.43    0.38
  -5   6  -9    0.53    0.41
  -6  -6  -9    0.04    0.33
  -6   6  -9    0.18    0.40
  -6   6  -9   -0.21    0.30
  -7   6  -9    4.37    0.80
  -7   6  -9    5.17    0.85
  10  -7  -9   16.49    1.53
 -10   7   9   17.78    1.36
   9  -7  -9    5.52    0.96
  -9  -7   9    3.98    0.81
   9   7  -9    3.37    0.80
  -9   7   9    3.43    0.74
   8  -7  -9    0.95    0.54
  -8  -7   9    0.89    0.48
  -8   7   9    1.82    0.58
   8   7  -9    0.39    0.53
  -7  -7   9    4.01    0.69
   7  -7  -9    3.19    0.67
  -7   7   9    3.14    0.62
   7   7  -9    2.75    0.65
  -6  -7   9    0.24    0.29
   6  -7  -9    0.26    0.39
   6   7  -9    0.21    0.34
  -5  -7   9   30.05    1.35
   5  -7  -9   31.01    1.41
   5   7  -9   35.29    1.48
  -5   7   9   31.46    1.40
   4  -7  -9    0.13    0.33
  -4  -7   9    0.11    0.27
   4   7  -9    0.28    0.33
  -4   7   9    0.10    0.28
   3  -7  -9   10.03    0.81
   3   7  -9    9.74    0.74
   3   7  -9   11.44    0.67
   3   7  -9   10.74    0.69
  -3   7   9   11.48    0.82
   2  -7  -9    5.37    0.64
   2  -7  -9    6.16    0.75
   2   7  -9    4.94    0.57
   2   7  -9    6.09    0.65
  -2   7   9    5.93    0.67
   2   7  -9    5.51    0.61
   1  -7  -9    0.65    0.30
   1  -7  -9    0.14    0.31
   1   7  -9    0.95    0.32
   1   7  -9    1.08    0.35
   1   7  -9    0.71    0.29
  -1   7   9    0.88    0.34
   0  -7  -9   27.09    1.29
   0  -7  -9   26.91    1.13
   0   7  -9   28.98    0.98
   0   7  -9   25.33    1.16
   0   7  -9   26.82    1.20
  -1  -7  -9   12.49    0.88
  -1  -7  -9   12.35    0.76
  -1   7  -9   12.51    0.90
  -1   7  -9   12.41    0.58
  -1   7  -9   12.23    0.86
  -2  -7  -9    9.84    0.95
  -2  -7  -9    9.37    0.68
  -2   7  -9    8.80    0.86
  -2   7  -9    9.30    0.92
  -3  -7  -9   15.01    1.00
  -3  -7  -9   16.49    0.85
  -3   7  -9   16.41    1.10
  -3   7  -9   14.21    1.00
  -4  -7  -9    0.13    0.30
  -4  -7  -9   -0.13    0.22
  -4   7  -9    0.46    0.36
  -4   7  -9    0.33    0.38
  -5  -7  -9    0.45    0.36
  -5  -7  -9    0.65    0.30
  -5   7  -9   -0.15    0.33
  -5   7  -9   -0.31    0.29
  -6  -7  -9    3.11    0.64
  -6   7  -9    2.59    0.67
  -6   7  -9    4.43    0.79
  -7   7  -9    6.09    0.91
  -7   7  -9    7.34    1.07
  -9  -8   9    9.96    1.17
   9  -8  -9   12.63    1.30
  -9   8   9   12.56    1.30
   9   8  -9    9.64    1.16
   8  -8  -9   -0.06    0.43
  -8  -8   9   -0.07    0.41
  -8   8   9   -0.38    0.25
   8   8  -9    0.15    0.48
  -7  -8   9    7.88    0.94
   7  -8  -9    8.21    0.97
   7   8  -9    7.81    0.93
  -7   8   9    9.27    1.01
   6  -8  -9   -0.31    0.37
  -6  -8   9   -0.42    0.25
  -6   8   9    0.02    0.35
   6   8  -9   -0.14    0.34
  -5  -8   9    5.99    0.74
   5  -8  -9    5.20    0.72
   5   8  -9    4.73    0.69
  -5   8   9    5.02    0.69
  -4  -8   9    0.24    0.30
   4  -8  -9   -0.21    0.26
   4   8  -9   -0.32    0.27
  -4   8   9    0.33    0.29
   3  -8  -9   15.04    0.95
   3   8  -9   14.70    0.92
  -3   8   9   15.53    0.97
   2  -8  -9    1.66    0.42
   2   8  -9    2.02    0.44
   2   8  -9    1.66    0.38
   2   8  -9    2.37    0.44
  -2   8   9    2.09    0.47
   1  -8  -9    0.77    0.37
   1  -8  -9    0.17    0.29
   1   8  -9    0.75    0.31
   1   8  -9    0.19    0.27
  -1   8   9    0.08    0.27
   1   8  -9    0.41    0.27
   0  -8  -9    7.54    0.76
   0  -8  -9    5.87    0.73
   0   8  -9    6.95    0.74
   0   8  -9    7.01    0.57
   0   8  -9    7.08    0.76
  -1  -8  -9    1.98    0.48
  -1  -8  -9    1.40    0.39
  -1   8  -9    2.39    0.49
  -1   8  -9    1.82    0.46
  -1   8  -9    1.69    0.31
  -2  -8  -9    3.47    0.61
  -2  -8  -9    4.40    0.58
  -2   8  -9    3.43    0.59
  -2   8  -9    4.40    0.65
  -3  -8  -9    1.35    0.45
  -3  -8  -9    2.91    0.49
  -3   8  -9    1.94    0.50
  -3   8  -9    1.56    0.45
  -4  -8  -9    0.63    0.37
  -4  -8  -9    0.41    0.29
  -4   8  -9   -0.02    0.35
  -4   8  -9    0.06    0.30
  -5  -8  -9    1.14    0.45
  -5  -8  -9    1.55    0.42
  -5   8  -9    1.06    0.45
  -5   8  -9    1.68    0.56
  -6   8  -9    2.34    0.67
  -6   8  -9    0.64    0.48
  -7   8  -9    8.52    1.12
   9  -9  -9    4.87    0.87
  -9  -9   9    4.58    0.82
   9   9  -9    4.96    0.92
  -9   9   9    5.17    0.89
  -8  -9   9    9.95    1.09
   8  -9  -9   10.15    1.19
  -8   9   9    9.67    1.12
   8   9  -9    8.82    1.07
  -7  -9   9   15.98    1.16
   7  -9  -9   15.01    1.16
   7   9  -9   14.08    1.15
   6  -9  -9    1.03    0.49
  -6  -9   9    0.77    0.43
   6   9  -9    0.90    0.49
  -6   9   9    1.86    0.58
  -5  -9   9    0.20    0.33
   5  -9  -9    0.74    0.42
   5   9  -9    0.69    0.38
  -5   9   9    1.35    0.48
   4  -9  -9    5.52    0.77
  -4   9   9    6.02    0.76
   4   9  -9    5.46    0.76
   3  -9  -9   16.11    1.05
  -3   9   9   19.00    1.08
   3   9  -9   17.52    1.04
   2  -9  -9    6.42    0.74
  -2   9   9    6.41    0.74
   2   9  -9    5.51    0.66
   2   9  -9    5.91    0.62
   1  -9  -9    1.14    0.40
   1  -9  -9    1.50    0.47
   1   9  -9    0.79    0.33
   1   9  -9    1.40    0.40
   1   9  -9    1.45    0.38
  -1   9   9    1.23    0.41
   0  -9  -9    3.37    0.56
   0  -9  -9    2.80    0.56
   0   9  -9    2.51    0.49
   0   9  -9    3.39    0.54
   0   9  -9    3.47    0.48
  -1  -9  -9    0.58    0.34
  -1  -9  -9    0.65    0.33
  -1   9  -9   -0.26    0.24
  -1   9  -9    0.73    0.33
  -1   9  -9    0.31    0.24
  -2  -9  -9    1.54    0.43
  -2  -9  -9    1.53    0.47
  -2   9  -9    1.90    0.52
  -2   9  -9    1.97    0.50
  -3  -9  -9   10.79    0.78
  -3  -9  -9    9.86    0.96
  -3   9  -9   11.78    1.16
  -3   9  -9   11.70    1.12
  -4  -9  -9    5.68    0.78
  -4  -9  -9    5.53    0.70
  -4   9  -9    5.40    0.82
  -4   9  -9    5.18    0.78
  -5  -9  -9    1.02    0.40
  -5  -9  -9    0.91    0.40
  -5   9  -9    0.96    0.46
  -5   9  -9    0.59    0.47
  -6  -9  -9    1.78    0.47
  -6   9  -9    2.09    0.63
  -8 -10   9   -0.13    0.38
   8 -10  -9    0.45    0.46
  -8  10   9   -0.22    0.35
   8  10  -9   -0.34    0.50
  -7 -10   9    5.15    0.80
   7 -10  -9    7.17    1.00
   7  10  -9    3.77    0.77
  -6 -10   9    1.79    0.54
   6 -10  -9    2.28    0.63
  -6  10   9    2.15    0.60
   6  10  -9    2.01    0.61
   5 -10  -9    0.78    0.44
  -5 -10   9    0.21    0.34
  -5  10   9    0.19    0.34
   5  10  -9    0.49    0.42
   4 -10  -9   12.48    0.98
   4  10  -9   16.23    1.09
  -4  10   9   14.48    1.05
   3 -10  -9   10.82    1.05
   3  10  -9   11.79    0.92
  -3  10   9   11.87    0.95
   2 -10  -9    0.31    0.37
  -2  10   9    0.31    0.34
   2  10  -9    0.48    0.37
   1 -10  -9    5.30    0.77
   1 -10  -9    4.08    0.65
   1  10  -9    6.16    0.75
   1  10  -9    5.00    0.64
  -1  10   9    7.08    0.82
   1  10  -9    5.99    0.67
   0 -10  -9    5.02    0.69
   0 -10  -9    6.07    0.83
   0  10  -9    5.38    0.68
   0  10  -9    5.51    0.62
   0  10  -9    4.87    0.69
  -1 -10  -9    9.26    0.90
  -1 -10  -9   10.63    1.06
  -1  10  -9    8.76    0.63
  -1  10  -9    7.25    0.81
  -1  10  -9    6.96    0.81
  -2 -10  -9    7.69    0.90
  -2 -10  -9    6.14    0.74
  -2  10  -9    6.77    0.85
  -2  10  -9    5.33    0.79
  -3 -10  -9    1.20    0.45
  -3 -10  -9    1.76    0.45
  -3  10  -9    1.52    0.54
  -3  10  -9    0.61    0.43
  -4 -10  -9    7.79    0.83
  -4 -10  -9    7.20    0.86
  -4  10  -9    7.22    0.97
  -5 -10  -9   12.92    0.96
  -5  10  -9   15.96    1.23
  -6 -10  -9   -0.12    0.32
  -6  10  -9   -0.16    0.38
  -8 -11   9   -0.05    0.41
   8 -11  -9    0.63    0.51
   8  11  -9    0.59    0.56
  -8  11   9   -0.06    0.33
  -7 -11   9    0.15    0.43
   7 -11  -9    0.14    0.51
   7  11  -9   -0.01    0.50
  -7  11   9    0.04    0.45
   6 -11  -9   -0.16    0.42
  -6 -11   9   -0.17    0.37
  -6  11   9    0.16    0.42
   6  11  -9   -0.17    0.44
   5 -11  -9    1.25    0.53
   5  11  -9    0.60    0.51
  -5  11   9    0.50    0.41
   4 -11  -9    1.51    0.52
   4  11  -9    1.71    0.54
  -4  11   9    2.30    0.58
   3 -11  -9   -0.15    0.37
  -3  11   9    0.61    0.42
   3  11  -9    0.66    0.42
   2 -11  -9    1.07    0.46
  -2  11   9    1.24    0.46
   2  11  -9    0.95    0.42
   1 -11  -9    0.86    0.42
   1 -11  -9    0.23    0.34
   1  11  -9    0.34    0.36
   1  11  -9    0.52    0.30
  -1  11   9    1.08    0.43
   0 -11  -9    8.22    0.91
   0 -11  -9    6.74    0.83
   0  11  -9    8.07    0.75
   0  11  -9    5.90    0.76
   0  11  -9    6.94    0.80
  -1 -11  -9    7.60    0.86
  -1 -11  -9    7.43    0.89
  -1  11  -9    6.81    0.83
  -1  11  -9    9.71    0.97
  -1  11  -9    7.94    0.64
  -2 -11  -9    0.15    0.32
  -2 -11  -9    0.22    0.36
  -2  11  -9   -0.20    0.29
  -2  11  -9    0.10    0.26
  -3 -11  -9    0.49    0.37
  -3 -11  -9    0.00    0.31
  -3  11  -9    0.27    0.39
  -4 -11  -9    2.05    0.51
  -4  11  -9    2.05    0.58
  -5 -11  -9   10.88    1.06
  -5  11  -9   10.11    1.17
   7 -12  -9    8.06    1.14
  -7 -12   9   10.58    1.22
  -7  12   9    9.87    1.22
   7  12  -9    9.55    1.21
   6 -12  -9    0.55    0.45
   6  12  -9    0.51    0.52
  -6  12   9    0.21    0.39
   5 -12  -9    0.57    0.51
  -5  12   9    0.51    0.51
   5  12  -9    0.85    0.52
   4 -12  -9    4.13    0.74
  -4  12   9    3.50    0.68
   4  12  -9    2.97    0.68
   3 -12  -9    5.60    0.87
   3  12  -9    4.70    0.77
  -3  12   9    5.67    0.85
   2 -12  -9    1.79    0.56
  -2  12   9    1.37    0.50
   2  12  -9    1.96    0.54
   1 -12  -9    1.23    0.48
   1 -12  -9    0.84    0.47
   1  12  -9    0.75    0.40
   0 -12  -9   -0.28    0.31
   0 -12  -9   -0.16    0.31
   0  12  -9    0.44    0.35
   0  12  -9    0.03    0.31
  -1 -12  -9    4.70    0.72
  -1 -12  -9    4.21    0.72
  -1  12  -9    5.14    0.61
  -1  12  -9    6.26    0.86
  -2 -12  -9    1.98    0.51
  -2 -12  -9    1.70    0.53
  -2  12  -9    2.23    0.60
  -2  12  -9    1.84    0.41
  -3 -12  -9    1.07    0.49
  -3 -12  -9    1.72    0.52
  -3  12  -9    1.83    0.58
  -4 -12  -9    5.70    0.82
  -4  12  -9    4.94    0.83
  -6  13   9    0.25    0.42
   6  13  -9    0.51    0.52
   5 -13  -9   -0.08    0.48
  -5  13   9    0.75    0.53
   5  13  -9    0.07    0.49
   4 -13  -9    1.69    0.58
  -4  13   9    1.35    0.55
   4  13  -9    1.75    0.60
   3 -13  -9    6.82    0.94
   3  13  -9    8.78    1.01
  -3  13   9    8.34    0.99
   2 -13  -9    7.03    0.92
   2  13  -9    5.76    0.80
  -2  13   9    6.15    0.87
   1 -13  -9    2.59    0.60
   1 -13  -9    3.30    0.71
   0 -13  -9    6.95    0.94
   0 -13  -9    6.91    0.92
   0  13  -9    4.82    0.75
   0  13  -9    6.59    0.76
  -1 -13  -9    2.84    0.66
  -1 -13  -9    2.34    0.59
  -1  13  -9    2.34    0.49
  -1  13  -9    2.23    0.57
  -2 -13  -9    8.04    0.96
  -2 -13  -9    9.04    1.01
  -2  13  -9    9.06    1.05
  -2  13  -9    8.34    0.75
  -3 -13  -9    1.45    0.54
  -3  13  -9    1.22    0.54
   5 -14  -9   -0.53    0.38
  -5  14   9    0.26    0.45
   5  14  -9    0.29    0.53
   4 -14  -9    0.86    0.56
   4  14  -9    0.91    0.56
  -4  14   9    0.67    0.51
   3 -14  -9    0.38    0.48
   3  14  -9    0.01    0.43
  -3  14   9    0.54    0.42
   2 -14  -9    3.25    0.76
   2  14  -9    3.11    0.66
  -2  14   9    4.67    0.84
   1 -14  -9    2.98    0.67
   1 -14  -9    3.31    0.73
   1  14  -9    3.49    0.66
   0 -14  -9    6.15    0.92
   0 -14  -9    5.24    0.88
   0  14  -9    7.39    0.86
   0  14  -9    6.04    0.88
  -1 -14  -9    0.46    0.45
  -1 -14  -9    0.47    0.41
  -1  14  -9    0.62    0.42
  -1  14  -9   -0.02    0.36
  -2 -14  -9    1.08    0.57
  -2 -14  -9    0.58    0.40
  -2  14  -9    0.83    0.48
  -2  14  -9    0.88    0.42
   3 -15  -9    4.77    0.91
   3  15  -9    5.56    0.88
  -3  15   9    6.58    1.05
   2 -15  -9    7.59    1.01
   2  15  -9    9.92    1.11
  -2  15   9    8.33    1.08
   1 -15  -9   -0.67    0.35
   1 -15  -9   -0.29    0.39
   1  15  -9    0.13    0.43
   0 -15  -9    9.52    1.17
   0 -15  -9    8.93    1.09
   0  15  -9   11.01    1.03
  -1 -15  -9    0.20    0.41
  -1 -15  -9    0.31    0.50
  -1  15  -9    0.11    0.38
  -1  15  -9    0.77    0.44
 -10   0  10    0.26    0.42
  10   0 -10   -0.59    0.42
  -9   0  10   -0.15    0.33
   9   0 -10   -0.33    0.39
  -8   0  10    0.69    0.45
   8   0 -10    1.12    0.54
   7   0 -10   -0.03    0.32
  -7   0  10    0.04    0.31
   7   0 -10    0.22    0.28
  -6   0  10    0.51    0.34
   6   0 -10    0.16    0.32
   6   0 -10    0.98    0.35
  -5   0  10    0.59    0.33
   5   0 -10    0.28    0.28
   5   0 -10    0.14    0.34
  -4   0  10    0.15    0.23
   4   0 -10    0.02    0.28
   4   0 -10   -0.06    0.25
   3   0 -10    0.15    0.26
   3   0 -10    0.16    0.18
  -3   0  10   -0.16    0.19
   3   0 -10   -0.29    0.22
   2   0 -10    9.97    0.59
   2   0 -10    9.38    0.61
   2   0 -10    8.35    0.69
   1   0 -10   -0.03    0.19
   1   0 -10    0.00    0.24
   1   0 -10   -0.11    0.18
   0   0 -10   14.94    0.95
   0   0 -10   15.35    0.83
   0   0 -10   15.53    0.62
  -1   0 -10    0.12    0.14
  -1   0 -10    0.18    0.25
  -1   0 -10   -0.36    0.20
  -2   0 -10  139.54    3.05
  -2   0 -10  135.79    3.22
  -3   0 -10    0.24    0.29
  -3   0 -10   -0.07    0.27
  -4   0 -10   -0.10    0.27
  -4   0 -10   -0.33    0.23
  -5   0 -10   -0.31    0.29
  -5   0 -10   -0.46    0.26
  -6   0 -10    4.35    0.78
  -6   0 -10    4.13    0.74
  -7   0 -10    0.08    0.42
 -10  -1  10    0.75    0.46
  10  -1 -10    0.88    0.51
  10   1 -10    1.54    0.63
 -10   1  10    0.16    0.41
   9  -1 -10    1.04    0.56
  -9  -1  10    1.80    0.60
  -9   1  10    1.32    0.55
   9   1 -10    1.51    0.61
   8  -1 -10    2.51    0.62
  -8  -1  10    3.49    0.67
   8   1 -10    2.30    0.60
  -8   1  10    2.83    0.62
   7  -1 -10   15.29    1.07
  -7  -1  10   17.55    1.12
   7  -1 -10   15.91    0.98
  -7   1  10   16.56    1.09
   7   1 -10   18.37    1.18
   6  -1 -10    3.68    0.57
   6  -1 -10    3.79    0.64
  -6  -1  10    3.82    0.62
  -6   1  10    3.95    0.63
   6   1 -10    3.94    0.65
   6   1 -10    3.28    0.50
   5  -1 -10   10.26    0.78
   5  -1 -10    8.71    0.86
  -5  -1  10    9.47    0.74
  -5   1  10    9.24    0.74
   5   1 -10   11.12    0.84
   5   1 -10    9.31    0.69
  -4  -1  10   16.10    0.89
   4  -1 -10   17.19    0.95
   4  -1 -10   16.79    0.94
  -4   1  10   17.05    0.91
   4   1 -10   14.40    0.85
   4   1 -10   13.95    0.87
   3  -1 -10    5.08    0.64
  -3  -1  10    4.94    0.60
   3  -1 -10    4.76    0.58
   3   1 -10    4.42    0.57
   3   1 -10    5.87    0.44
   3   1 -10    4.56    0.56
  -3   1  10    4.54    0.55
   2  -1 -10    5.35    0.68
   2  -1 -10    6.16    0.58
   2   1 -10    6.33    0.59
   2   1 -10    5.45    0.51
   2   1 -10    6.41    0.66
   1  -1 -10    2.58    0.38
   1  -1 -10    3.28    0.45
   1  -1 -10    2.13    0.44
   1   1 -10    2.64    0.41
   1   1 -10    2.92    0.50
   1   1 -10    2.55    0.35
   0  -1 -10    2.33    0.47
   0  -1 -10    1.98    0.40
   0  -1 -10    2.36    0.32
   0   1 -10    2.22    0.29
   0   1 -10    2.31    0.48
   0   1 -10    2.70    0.45
  -1  -1 -10    0.58    0.18
  -1  -1 -10    0.59    0.32
  -1  -1 -10    0.62    0.30
  -1   1 -10    0.62    0.33
  -1   1 -10    0.58    0.15
  -1   1 -10    0.72    0.32
  -2  -1 -10   15.07    0.98
  -2  -1 -10   14.24    0.91
  -2   1 -10   13.67    0.86
  -2   1 -10   14.55    0.96
  -3  -1 -10   28.38    1.32
  -3  -1 -10   27.98    1.35
  -3   1 -10   29.22    1.39
  -3   1 -10   29.05    1.32
  -4  -1 -10    1.01    0.41
  -4  -1 -10    1.36    0.46
  -4   1 -10    1.59    0.45
  -4   1 -10    1.95    0.54
  -5  -1 -10    0.99    0.43
  -5   1 -10    1.81    0.52
  -5   1 -10    1.38    0.51
  -6  -1 -10    0.90    0.46
  -6   1 -10    1.67    0.55
  -6   1 -10    2.37    0.58
  -7  -1 -10    8.60    1.06
  -7   1 -10    7.07    0.97
  -7   1 -10    8.34    1.05
  10  -2 -10    2.24    0.67
 -10  -2  10    2.02    0.65
 -10   2  10    1.43    0.54
  10   2 -10    3.16    0.80
   9  -2 -10    0.13    0.42
  -9  -2  10    0.95    0.52
   9   2 -10    0.88    0.53
  -9   2  10    0.64    0.42
   8  -2 -10    1.29    0.51
  -8  -2  10    1.19    0.46
  -8   2  10    1.88    0.53
   8   2 -10    0.66    0.43
  -7  -2  10    0.31    0.31
   7  -2 -10    0.19    0.39
  -7   2  10    1.07    0.45
   7   2 -10   -0.23    0.31
   6  -2 -10    0.76    0.37
  -6  -2  10    0.63    0.35
   6  -2 -10    0.08    0.34
   6   2 -10   -0.21    0.22
  -6   2  10    0.58    0.33
   6   2 -10    0.04    0.33
   5  -2 -10   28.49    1.28
   5  -2 -10   27.18    1.24
  -5  -2  10   25.42    1.18
  -5   2  10   26.68    1.23
   5   2 -10   27.28    1.10
   5   2 -10   27.70    1.26
   4  -2 -10   73.31    2.04
   4  -2 -10   68.75    1.95
  -4  -2  10   65.33    1.84
   4   2 -10   65.31    1.88
   4   2 -10   69.01    1.88
  -4   2  10   69.53    1.94
   3  -2 -10    1.17    0.39
   3  -2 -10    0.86    0.32
  -3   2  10    1.01    0.31
   3   2 -10    1.03    0.34
   3   2 -10    1.75    0.40
   3   2 -10    0.90    0.25
   2  -2 -10    1.00    0.35
   2  -2 -10    0.47    0.26
   2   2 -10    1.06    0.30
   2   2 -10    0.80    0.31
   2   2 -10    0.96    0.27
   1  -2 -10    1.12    0.30
   1  -2 -10    1.56    0.43
   1   2 -10    1.26    0.28
   1   2 -10    1.56    0.39
   1   2 -10    1.49    0.35
   0  -2 -10    1.51    0.44
   0  -2 -10    1.52    0.29
   0   2 -10    1.42    0.25
   0   2 -10    1.12    0.33
   0   2 -10    0.93    0.39
  -1  -2 -10    0.76    0.21
  -1  -2 -10    1.41    0.43
  -1   2 -10    0.16    0.29
  -1   2 -10    0.24    0.29
  -2  -2 -10    0.90    0.19
  -2  -2 -10    1.20    0.44
  -2   2 -10    1.54    0.45
  -2   2 -10    0.59    0.33
  -3  -2 -10  126.53    3.12
  -3   2 -10  123.94    2.98
  -3   2 -10  122.36    3.13
  -4  -2 -10   18.84    1.18
  -4   2 -10   17.48    1.14
  -4   2 -10   19.39    1.15
  -5  -2 -10    0.91    0.40
  -5   2 -10    0.48    0.41
  -5   2 -10    0.96    0.44
  -6  -2 -10    0.30    0.35
  -6   2 -10    0.04    0.38
  -6   2 -10    0.03    0.36
  -7  -2 -10    0.04    0.42
  -7   2 -10    1.28    0.55
  -7   2 -10    1.39    0.53
  10  -3 -10   15.38    1.45
 -10  -3  10   18.54    1.37
 -10   3  10   19.14    1.39
  10   3 -10   17.19    1.40
  -9  -3  10    3.01    0.67
   9  -3 -10    4.26    0.84
   9   3 -10    4.61    0.84
  -9   3  10    3.33    0.72
  -8  -3  10    1.47    0.47
   8  -3 -10    3.45    0.75
   8   3 -10    0.99    0.52
  -8   3  10    2.88    0.66
  -7  -3  10    0.34    0.34
   7  -3 -10   -0.04    0.33
   7   3 -10    0.28    0.40
  -7   3  10   -0.03    0.30
  -6  -3  10    1.42    0.44
   6  -3 -10    1.55    0.46
   6   3 -10    0.89    0.40
  -6   3  10    1.16    0.40
   5  -3 -10   17.16    1.05
  -5  -3  10   20.22    1.05
   5  -3 -10   19.20    1.08
   5   3 -10   18.98    1.06
  -5   3  10   18.59    1.02
   5   3 -10   19.08    0.91
   4  -3 -10  111.57    2.77
   4  -3 -10  114.79    2.70
  -4  -3  10  121.23    2.65
  -4   3  10  112.28    2.65
   4   3 -10  115.22    2.65
   4   3 -10  119.93    2.57
   3  -3 -10   57.78    1.85
   3  -3 -10   57.57    1.69
   3   3 -10   56.55    1.68
   3   3 -10   58.71    1.64
   3   3 -10   56.65    1.43
  -3   3  10   60.46    1.69
   2  -3 -10    2.00    0.47
   2  -3 -10    1.28    0.34
   2   3 -10    1.29    0.32
   2   3 -10    1.19    0.31
   2   3 -10    0.98    0.35
   1  -3 -10    3.18    0.55
   1  -3 -10    2.95    0.42
   1   3 -10    2.36    0.44
   1   3 -10    2.94    0.38
   1   3 -10    2.51    0.43
   0  -3 -10   22.58    0.86
   0  -3 -10   23.58    1.17
   0   3 -10   21.35    1.11
   0   3 -10   22.85    1.02
   0   3 -10   23.67    0.74
  -1  -3 -10   13.83    0.94
  -1  -3 -10   13.87    0.62
  -1   3 -10   11.24    0.87
  -1   3 -10   11.93    0.80
  -2  -3 -10    2.42    0.30
  -2  -3 -10    2.24    0.53
  -2   3 -10    3.89    0.60
  -2   3 -10    2.15    0.49
  -3  -3 -10    4.18    0.68
  -3   3 -10    2.82    0.60
  -3   3 -10    2.61    0.53
  -4  -3 -10   -0.02    0.29
  -4   3 -10   -0.10    0.27
  -4   3 -10   -0.24    0.28
  -5  -3 -10    7.48    0.93
  -5   3 -10    6.62    0.88
  -5   3 -10    8.26    0.94
  -6  -3 -10    1.06    0.47
  -6   3 -10    1.16    0.47
  -6   3 -10    0.44    0.42
  -7  -3 -10    3.49    0.72
  -7   3 -10    2.36    0.67
  -7   3 -10    3.21    0.71
  10  -4 -10    0.31    0.52
 -10  -4  10   -0.47    0.36
 -10   4  10    0.19    0.43
   9  -4 -10    3.90    0.81
  -9  -4  10    4.97    0.81
  -9   4  10    3.66    0.74
   9   4 -10    3.74    0.76
   8  -4 -10    0.80    0.48
  -8  -4  10    1.56    0.51
  -8   4  10    1.29    0.47
   8   4 -10    0.70    0.50
  -7  -4  10    0.85    0.40
   7  -4 -10    0.34    0.39
   7   4 -10    0.23    0.40
  -7   4  10    1.13    0.46
  -6  -4  10    0.71    0.36
   6  -4 -10    0.00    0.37
  -6   4  10    0.72    0.36
   6   4 -10    0.32    0.39
  -5  -4  10    0.33    0.32
   5  -4 -10    1.12    0.43
   5   4 -10    1.43    0.38
   5   4 -10    1.49    0.44
  -5   4  10    0.88    0.34
   4  -4 -10   94.89    2.43
   4  -4 -10   96.81    2.56
  -4  -4  10   97.73    2.34
  -4   4  10   93.66    2.38
   4   4 -10   93.91    2.35
   4   4 -10   94.14    2.20
   3  -4 -10    1.40    0.42
   3  -4 -10    1.74    0.42
   3   4 -10    1.58    0.38
  -3   4  10    1.15    0.36
   3   4 -10    1.26    0.31
   3   4 -10    1.09    0.33
   2  -4 -10    0.90    0.34
   2  -4 -10    1.31    0.43
   2   4 -10    1.10    0.30
   2   4 -10    0.97    0.34
   2   4 -10    1.15    0.32
   1  -4 -10    1.69    0.37
   1  -4 -10    1.27    0.39
   1   4 -10    1.08    0.36
   1   4 -10    1.49    0.36
   1   4 -10    1.82    0.34
   0  -4 -10   16.35    0.77
   0  -4 -10   14.25    0.95
   0   4 -10   16.53    0.90
   0   4 -10   15.34    0.62
   0   4 -10   13.87    0.89
  -1  -4 -10    7.49    0.82
  -1  -4 -10    6.03    0.49
  -1   4 -10    5.32    0.72
  -1   4 -10    7.64    0.79
  -2  -4 -10    1.51    0.28
  -2  -4 -10    1.07    0.39
  -2   4 -10    1.64    0.48
  -2   4 -10    1.21    0.40
  -3  -4 -10   61.80    2.06
  -3  -4 -10   58.25    1.42
  -3   4 -10   61.57    2.01
  -3   4 -10   60.87    2.11
  -4  -4 -10    2.36    0.58
  -4   4 -10    1.65    0.52
  -4   4 -10    0.99    0.41
  -5  -4 -10    0.48    0.38
  -5   4 -10    0.87    0.48
  -5   4 -10    0.21    0.38
  -6  -4 -10   -0.30    0.28
  -6   4 -10    0.02    0.33
  -6   4 -10    0.76    0.49
  -7  -4 -10    0.26    0.39
  -7   4 -10   -0.25    0.39
  -7   4 -10    0.59    0.50
  10  -5 -10   16.62    1.60
 -10  -5  10   19.03    1.37
 -10   5  10   15.91    1.32
  10   5 -10   13.64    1.36
  -9  -5  10    1.15    0.54
   9  -5 -10    1.14    0.57
  -9   5  10    2.98    0.71
   9   5 -10    1.72    0.68
  -8  -5  10    0.51    0.43
   8  -5 -10    0.65    0.43
  -8   5  10    1.08    0.48
   8   5 -10    1.67    0.56
  -7  -5  10    0.55    0.37
   7  -5 -10    0.95    0.45
  -7   5  10    0.83    0.40
   7   5 -10    0.86    0.48
  -6  -5  10    0.98    0.38
   6  -5 -10    1.64    0.52
  -6   5  10    1.05    0.40
   6   5 -10    1.06    0.44
  -5  -5  10   24.20    1.18
   5  -5 -10   25.72    1.28
  -5   5  10   24.14    1.22
   5   5 -10   23.95    1.21
   4  -5 -10   14.91    0.97
   4   5 -10   17.80    0.99
  -4   5  10   15.51    0.94
   4   5 -10   18.27    0.87
   3  -5 -10    2.69    0.52
   3  -5 -10    2.47    0.46
   3   5 -10    3.54    0.46
   3   5 -10    3.86    0.53
  -3   5  10    3.10    0.53
   3   5 -10    3.85    0.52
   2  -5 -10   56.44    1.89
   2  -5 -10   58.24    1.70
   2   5 -10   57.99    1.60
   2   5 -10   56.84    1.70
   2   5 -10   53.62    1.54
   1  -5 -10   24.46    1.03
   1  -5 -10   23.16    1.18
   1   5 -10   24.81    0.93
   1   5 -10   26.25    1.17
   1   5 -10   23.74    1.04
   0  -5 -10   13.17    0.93
   0  -5 -10   13.00    0.74
   0   5 -10   13.29    0.91
   0   5 -10   14.87    0.87
   0   5 -10   15.65    0.65
  -1  -5 -10   92.02    2.54
  -1  -5 -10   90.24    2.01
  -1   5 -10   86.71    2.32
  -1   5 -10   89.99    2.48
  -2  -5 -10   20.05    1.15
  -2  -5 -10   20.53    0.83
  -2   5 -10   20.79    1.20
  -2   5 -10   20.70    1.11
  -3  -5 -10    1.27    0.29
  -3  -5 -10    1.87    0.52
  -3   5 -10    1.17    0.44
  -3   5 -10    1.85    0.53
  -4  -5 -10   15.40    1.08
  -4   5 -10   17.63    1.15
  -4   5 -10   16.96    1.17
  -5  -5 -10    8.46    0.98
  -5   5 -10    6.21    0.88
  -5   5 -10    6.59    0.92
  -6  -5 -10    0.00    0.35
  -6   5 -10    0.41    0.44
  -6   5 -10    0.55    0.46
  -7  -5 -10    0.11    0.40
  -7   5 -10    0.55    0.50
  -7   5 -10   -0.30    0.37
   9  -6 -10    0.51    0.50
  -9  -6  10    0.58    0.41
   9   6 -10    0.46    0.53
  -9   6  10    0.83    0.50
  -8  -6  10    0.07    0.36
   8  -6 -10   -0.37    0.42
  -8   6  10   -0.37    0.29
   8   6 -10    0.33    0.44
  -7  -6  10   -0.01    0.32
   7  -6 -10    0.15    0.38
   7   6 -10    0.03    0.40
  -7   6  10    0.65    0.40
  -6  -6  10    7.89    0.85
   6  -6 -10    8.59    0.97
  -6   6  10    9.27    0.96
   6   6 -10    6.56    0.80
   5  -6 -10    1.15    0.43
  -5  -6  10    0.98    0.37
  -5   6  10    1.91    0.48
   5   6 -10    0.34    0.37
   4  -6 -10    2.53    0.54
  -4   6  10    2.41    0.54
   4   6 -10    2.56    0.52
   3  -6 -10    1.94    0.46
   3  -6 -10    1.05    0.39
   3   6 -10    1.42    0.40
   3   6 -10    1.86    0.36
  -3   6  10    2.28    0.44
   3   6 -10    1.49    0.35
   2  -6 -10   13.66    0.95
   2  -6 -10   13.76    0.86
   2   6 -10   14.73    0.86
   2   6 -10   14.78    0.82
   2   6 -10   14.46    0.82
   1  -6 -10   18.36    0.94
   1  -6 -10   17.05    1.06
   1   6 -10   17.32    0.98
   1   6 -10   17.70    0.81
   1   6 -10   16.46    0.93
   0  -6 -10    0.06    0.25
   0  -6 -10    0.11    0.29
   0   6 -10    0.04    0.28
   0   6 -10   -0.14    0.25
   0   6 -10   -0.12    0.18
  -1  -6 -10    5.58    0.58
  -1  -6 -10    3.93    0.62
  -1   6 -10    5.23    0.70
  -1   6 -10    4.07    0.65
  -2  -6 -10    8.22    0.94
  -2  -6 -10    6.90    0.57
  -2   6 -10    7.24    0.83
  -2   6 -10    8.03    0.92
  -3  -6 -10   17.20    1.12
  -3  -6 -10   16.48    0.79
  -3   6 -10   17.32    1.14
  -3   6 -10   16.75    1.10
  -4  -6 -10   33.01    1.51
  -4   6 -10   30.93    1.53
  -4   6 -10   33.64    1.64
  -5  -6 -10    0.12    0.32
  -5   6 -10    0.15    0.40
  -5   6 -10    0.53    0.42
  -6  -6 -10    9.29    1.07
  -6   6 -10    6.97    0.99
  -6   6 -10    9.41    1.10
  -7   6 -10    3.90    0.82
   9  -7 -10    0.00    0.50
  -9  -7  10    0.55    0.44
   9   7 -10   -0.06    0.49
  -9   7  10    0.00    0.43
   8  -7 -10    0.01    0.42
  -8  -7  10    1.19    0.52
   8   7 -10    0.53    0.54
  -8   7  10    0.04    0.32
   7  -7 -10    0.56    0.40
  -7  -7  10    0.40    0.37
  -7   7  10    0.35    0.32
   7   7 -10   -0.19    0.40
   6  -7 -10    0.26    0.38
  -6  -7  10   -0.04    0.31
  -6   7  10    0.09    0.32
   6   7 -10    0.30    0.36
   5  -7 -10   -0.27    0.32
   5   7 -10    0.05    0.34
   4  -7 -10    1.89    0.51
  -4   7  10    2.03    0.50
   4   7 -10    2.40    0.53
   3  -7 -10   45.78    1.64
   3   7 -10   43.41    1.52
   3   7 -10   43.39    1.41
   3   7 -10   44.85    1.44
  -3   7  10   44.60    1.61
   2  -7 -10   24.50    1.30
   2  -7 -10   19.57    1.07
   2   7 -10   22.75    1.05
   2   7 -10   23.07    1.06
   2   7 -10   22.47    1.03
   1  -7 -10    0.47    0.35
   1  -7 -10    0.46    0.31
   1   7 -10    0.34    0.28
   1   7 -10    1.02    0.37
   1   7 -10    0.70    0.31
   0  -7 -10    1.88    0.51
   0  -7 -10    1.01    0.35
   0   7 -10    0.91    0.36
   0   7 -10    1.37    0.32
   0   7 -10    1.29    0.40
  -1  -7 -10    0.39    0.31
  -1  -7 -10    0.26    0.27
  -1   7 -10    0.43    0.33
  -1   7 -10    0.17    0.29
  -2  -7 -10    1.63    0.50
  -2  -7 -10    0.96    0.33
  -2   7 -10    1.81    0.51
  -2   7 -10    1.51    0.45
  -3  -7 -10    0.56    0.37
  -3  -7 -10    0.56    0.31
  -3   7 -10    0.11    0.32
  -3   7 -10    0.41    0.36
  -4  -7 -10   -0.07    0.26
  -4  -7 -10    0.25    0.26
  -4   7 -10    0.11    0.36
  -4   7 -10   -0.25    0.28
  -5  -7 -10   22.22    1.31
  -5   7 -10   21.54    1.43
  -5   7 -10   23.14    1.41
  -6  -7 -10    3.73    0.73
  -6   7 -10    3.38    0.80
  -6   7 -10    3.34    0.75
  -9  -8  10    4.31    0.84
   9  -8 -10    3.18    0.79
   9   8 -10    4.49    0.92
  -9   8  10    3.51    0.76
   8  -8 -10   -0.43    0.42
  -8  -8  10   -0.04    0.38
  -8   8  10   -0.15    0.38
   8   8 -10    0.26    0.44
  -7  -8  10    4.38    0.74
   7  -8 -10    5.34    0.88
   7   8 -10    3.96    0.77
  -7   8  10    4.99    0.81
   6  -8 -10    0.91    0.48
  -6  -8  10    0.20    0.35
   6   8 -10   -0.03    0.38
   5  -8 -10    0.20    0.37
   5   8 -10    0.11    0.34
  -5   8  10    0.88    0.43
   4  -8 -10    4.41    0.70
   4   8 -10    4.41    0.61
   4   8 -10    4.08    0.64
  -4   8  10    4.47    0.68
   3  -8 -10   37.87    1.55
  -3   8  10   35.95    1.50
   3   8 -10   36.60    1.44
   3   8 -10   37.93    1.34
   2  -8 -10    1.32    0.41
   2  -8 -10    1.21    0.47
   2   8 -10    1.39    0.40
   2   8 -10    1.91    0.42
   2   8 -10    1.83    0.42
   1  -8 -10   18.26    1.14
   1  -8 -10   15.71    0.96
   1   8 -10   17.47    1.00
   1   8 -10   17.48    0.99
   1   8 -10   17.47    0.88
   0  -8 -10   15.24    1.02
   0  -8 -10   13.22    0.88
   0   8 -10   16.07    1.01
   0   8 -10   12.75    0.71
   0   8 -10   12.29    0.89
  -1  -8 -10    1.61    0.42
  -1  -8 -10    2.78    0.60
  -1   8 -10    1.93    0.48
  -1   8 -10    1.62    0.32
  -1   8 -10    1.99    0.47
  -2  -8 -10    4.12    0.69
  -2  -8 -10    4.05    0.56
  -2   8 -10    4.04    0.70
  -2   8 -10    5.10    0.77
  -3  -8 -10    0.04    0.32
  -3  -8 -10    0.04    0.26
  -3   8 -10   -0.40    0.22
  -3   8 -10    0.40    0.41
  -4  -8 -10    1.40    0.39
  -4  -8 -10    1.28    0.48
  -4   8 -10    0.92    0.45
  -4   8 -10    2.21    0.61
  -5  -8 -10    1.57    0.50
  -5   8 -10    0.75    0.49
  -5   8 -10    1.61    0.55
  -6   8 -10    1.90    0.62
  -6   8 -10    1.55    0.57
   8  -9 -10    0.12    0.51
  -8  -9  10   -0.55    0.33
   8   9 -10    0.45    0.56
  -8   9  10   -0.10    0.38
  -7  -9  10    2.27    0.58
   7  -9 -10    1.81    0.58
  -7   9  10    1.88    0.59
   7   9 -10    1.85    0.66
   6  -9 -10   13.24    1.08
  -6   9  10   13.36    1.28
   6   9 -10    9.44    1.01
   5  -9 -10    3.98    0.70
  -5   9  10    4.03    0.70
   5   9 -10    5.10    0.77
   4  -9 -10    2.17    0.52
  -4   9  10    1.41    0.43
   4   9 -10    1.79    0.42
   4   9 -10    0.92    0.46
   3  -9 -10    0.64    0.39
   3   9 -10   -0.03    0.33
   3   9 -10    0.65    0.32
  -3   9  10    0.87    0.37
   2  -9 -10   13.86    1.06
   2  -9 -10   14.25    0.98
   2   9 -10   13.60    0.90
   2   9 -10   12.26    0.85
   2   9 -10   14.08    0.86
   1  -9 -10    2.27    0.51
   1  -9 -10    2.95    0.61
   1   9 -10    3.73    0.53
   1   9 -10    4.22    0.62
   1   9 -10    3.56    0.57
   0  -9 -10    9.79    0.80
   0  -9 -10   11.52    1.10
   0   9 -10    8.81    0.89
   0   9 -10   10.72    0.86
   0   9 -10    9.80    0.67
  -1  -9 -10    1.60    0.44
  -1  -9 -10    1.30    0.46
  -1   9 -10    1.82    0.35
  -1   9 -10    1.34    0.47
  -1   9 -10    1.55    0.51
  -2  -9 -10    0.31    0.34
  -2  -9 -10    0.31    0.33
  -2   9 -10    0.44    0.37
  -2   9 -10    0.39    0.34
  -3  -9 -10   -0.51    0.23
  -3  -9 -10   -0.08    0.31
  -3   9 -10    0.66    0.42
  -3   9 -10   -0.25    0.30
  -4  -9 -10    4.27    0.61
  -4  -9 -10    4.46    0.73
  -4   9 -10    3.88    0.75
  -4   9 -10    5.89    0.89
  -5  -9 -10    1.31    0.49
  -5  -9 -10    0.94    0.37
  -5   9 -10    1.92    0.61
  -5   9 -10    1.17    0.57
  -8 -10  10    0.74    0.45
   8 -10 -10    1.26    0.61
   8  10 -10    0.31    0.50
  -8  10  10    0.40    0.46
  -7 -10  10   -0.59    0.33
   7 -10 -10   -0.31    0.45
   7  10 -10    0.73    0.54
   6 -10 -10    0.50    0.47
   6  10 -10    0.33    0.45
  -6  10  10   -0.14    0.37
   5 -10 -10    1.26    0.51
   5  10 -10    1.11    0.53
  -5  10  10    0.86    0.47
   4 -10 -10    3.79    0.73
   4  10 -10    3.70    0.67
  -4  10  10    4.16    0.73
   3 -10 -10    5.30    0.77
   3  10 -10    4.39    0.67
   3  10 -10    4.47    0.62
  -3  10  10    4.84    0.73
   2 -10 -10    8.82    1.06
   2 -10 -10    8.94    0.96
   2  10 -10    6.75    0.77
   2  10 -10    7.97    0.82
   1 -10 -10    4.97    0.71
   1 -10 -10    5.03    0.80
   1  10 -10    7.35    0.73
   1  10 -10    5.57    0.74
   1  10 -10    4.70    0.66
   0 -10 -10    8.49    0.96
   0 -10 -10    9.16    0.93
   0  10 -10   11.20    1.03
   0  10 -10    8.68    0.88
   0  10 -10    9.63    0.71
  -1 -10 -10   10.14    1.05
  -1 -10 -10    8.98    0.90
  -1  10 -10    8.49    0.61
  -1  10 -10    8.85    0.93
  -1  10 -10    7.45    0.90
  -2 -10 -10    4.07    0.65
  -2 -10 -10    4.63    0.76
  -2  10 -10    4.40    0.74
  -2  10 -10    2.89    0.60
  -3 -10 -10    9.76    0.90
  -3 -10 -10   10.54    1.07
  -3  10 -10    9.31    1.06
  -3  10 -10   10.18    1.11
  -4 -10 -10   14.45    0.97
  -4 -10 -10   16.47    1.15
  -4  10 -10   16.93    1.30
  -4  10 -10   15.43    1.21
  -5 -10 -10    0.22    0.34
  -5  10 -10    0.29    0.44
   7 -11 -10    2.17    0.71
   7  11 -10    0.63    0.51
   6 -11 -10    8.76    1.14
   6  11 -10    8.45    1.04
  -6  11  10    9.08    1.11
   5 -11 -10    2.72    0.69
   5  11 -10    1.61    0.59
  -5  11  10    3.18    0.74
   4 -11 -10    1.65    0.58
   4  11 -10    1.33    0.55
  -4  11  10    1.16    0.50
   3 -11 -10    1.33    0.53
   3  11 -10    2.06    0.56
  -3  11  10    1.96    0.56
   2 -11 -10    5.04    0.77
   2 -11 -10    5.21    0.85
   2  11 -10    4.02    0.64
   2  11 -10    5.17    0.73
   1 -11 -10   -0.20    0.31
   1 -11 -10    0.10    0.38
   1  11 -10    0.27    0.32
   1  11 -10    0.34    0.33
   1  11 -10    0.43    0.31
   0 -11 -10    1.40    0.48
   0 -11 -10    1.46    0.52
   0  11 -10    1.33    0.43
   0  11 -10    1.54    0.46
   0  11 -10    0.93    0.38
  -1 -11 -10    5.14    0.81
  -1 -11 -10    3.90    0.69
  -1  11 -10    4.42    0.73
  -1  11 -10    3.94    0.68
  -1  11 -10    4.59    0.54
  -2 -11 -10    0.38    0.38
  -2 -11 -10   -0.43    0.29
  -2  11 -10   -0.35    0.28
  -2  11 -10   -0.45    0.24
  -3 -11 -10    0.87    0.43
  -3 -11 -10    0.65    0.42
  -3  11 -10    0.27    0.43
  -4 -11 -10    1.10    0.46
  -4 -11 -10    2.31    0.55
  -4  11 -10    2.36    0.69
   6 -12 -10   24.69    1.57
  -6  12  10   21.40    1.43
   6  12 -10   19.33    1.46
   5 -12 -10    1.97    0.68
   5  12 -10    1.50    0.56
  -5  12  10    1.29    0.55
   4 -12 -10   17.16    1.28
  -4  12  10   14.88    1.15
   4  12 -10   14.66    1.17
   3 -12 -10    6.38    0.90
   3  12 -10    5.62    0.82
  -3  12  10    5.36    0.85
   2 -12 -10   -0.35    0.34
   2  12 -10   -0.05    0.36
   2  12 -10    0.10    0.32
   1 -12 -10    0.95    0.52
   1 -12 -10    1.54    0.52
   1  12 -10    1.66    0.47
   1  12 -10    1.31    0.48
   0 -12 -10   -0.13    0.37
   0 -12 -10   -0.06    0.30
   0  12 -10   -0.12    0.31
   0  12 -10    0.42    0.31
  -1 -12 -10    1.90    0.55
  -1 -12 -10    1.49    0.49
  -1  12 -10    2.10    0.44
  -1  12 -10    3.16    0.69
  -2 -12 -10    1.78    0.56
  -2 -12 -10    1.87    0.55
  -2  12 -10    1.29    0.50
  -3 -12 -10   -0.20    0.33
  -3 -12 -10   -0.33    0.35
  -3  12 -10    0.00    0.44
   5 -13 -10    4.77    0.89
   5  13 -10    5.82    0.97
  -5  13  10    6.19    1.01
   4 -13 -10    3.35    0.73
  -4  13  10    4.05    0.75
   4  13 -10    1.94    0.62
   3 -13 -10    1.02    0.53
   3  13 -10    1.10    0.51
  -3  13  10    0.84    0.50
   2 -13 -10    1.14    0.53
   2  13 -10   -0.31    0.36
   1 -13 -10    0.79    0.50
   1 -13 -10   -0.11    0.40
   1  13 -10    0.39    0.40
   1  13 -10    0.09    0.34
   0 -13 -10    2.98    0.66
   0 -13 -10    3.03    0.68
   0  13 -10    4.63    0.67
   0  13 -10    2.95    0.61
  -1 -13 -10    1.95    0.57
  -1 -13 -10    2.12    0.61
  -1  13 -10    1.34    0.43
  -1  13 -10    1.58    0.55
  -2 -13 -10    7.26    0.96
  -2 -13 -10    6.91    0.96
  -2  13 -10    5.46    0.88
   4 -14 -10   -0.07    0.48
  -4  14  10    0.60    0.51
   4  14 -10    0.50    0.57
   3 -14 -10   -0.20    0.47
  -3  14  10    0.40    0.51
   3  14 -10    0.01    0.46
   2 -14 -10    0.46    0.50
   2  14 -10    0.54    0.45
   1 -14 -10    5.76    0.93
   1 -14 -10    6.18    1.00
   1  14 -10    5.25    0.76
   1  14 -10    4.96    0.81
   0 -14 -10    0.46    0.49
   0 -14 -10   -0.06    0.38
   0  14 -10   -0.54    0.28
   0  14 -10    0.48    0.43
  -1 -14 -10    6.13    0.95
  -1 -14 -10    4.66    0.82
  -1  14 -10    5.93    0.74
  -1  14 -10    5.23    0.89
 -10   0  11   -0.18    0.37
  10   0 -11    0.03    0.52
  -9   0  11   34.05    1.74
   9   0 -11   33.35    1.78
   8   0 -11   -0.07    0.36
  -8   0  11    0.32    0.36
   7   0 -11    5.89    0.72
   7   0 -11    4.71    0.75
  -7   0  11    5.63    0.77
   6   0 -11   -0.01    0.25
   6   0 -11    0.05    0.37
  -6   0  11    0.26    0.33
  -5   0  11   57.21    1.83
   5   0 -11   55.56    1.87
   5   0 -11   57.61    1.81
   4   0 -11   -0.04    0.24
   4   0 -11   -0.24    0.26
   3   0 -11    0.11    0.25
   3   0 -11    0.06    0.28
   2   0 -11    0.01    0.22
   2   0 -11    0.40    0.33
   2   0 -11    0.25    0.23
   1   0 -11   17.17    0.86
   1   0 -11   17.86    1.05
   1   0 -11   17.14    0.76
   0   0 -11   -0.03    0.25
   0   0 -11   -0.07    0.22
   0   0 -11    0.18    0.18
  -1   0 -11    8.74    0.81
  -1   0 -11    9.50    0.95
  -2   0 -11    0.21    0.28
  -2   0 -11   -0.35    0.27
  -3   0 -11    0.84    0.42
  -3   0 -11    1.88    0.56
  -4   0 -11    0.32    0.37
  -4   0 -11    0.53    0.43
  -5   0 -11   -0.14    0.34
  -5   0 -11    0.01    0.35
  -6   0 -11    0.15    0.40
  -6   0 -11   -0.27    0.39
  -7   0 -11   -0.08    0.37
 -10  -1  11    0.99    0.57
  10  -1 -11    1.66    0.62
  10   1 -11    1.59    0.69
 -10   1  11    1.28    0.55
   9  -1 -11   -0.49    0.41
  -9  -1  11   -0.04    0.38
  -9   1  11    0.74    0.43
   9   1 -11   -0.45    0.42
  -8  -1  11    0.04    0.32
   8  -1 -11   -0.02    0.35
  -8   1  11    0.34    0.35
   8   1 -11    0.57    0.52
   7  -1 -11    3.18    0.66
  -7  -1  11    3.75    0.64
   7  -1 -11    4.26    0.64
   7   1 -11    3.05    0.61
  -7   1  11    4.26    0.71
   6  -1 -11   19.99    1.10
  -6  -1  11   20.63    1.16
   6  -1 -11   19.99    1.16
  -6   1  11   22.26    1.20
   6   1 -11   20.59    1.20
   6   1 -11   23.28    1.11
  -5  -1  11    1.73    0.45
   5  -1 -11    1.56    0.45
   5  -1 -11    2.44    0.50
   5   1 -11    1.72    0.41
  -5   1  11    2.47    0.52
   5   1 -11    2.56    0.52
   4  -1 -11    3.10    0.54
   4  -1 -11    2.57    0.50
   4   1 -11    3.82    0.58
   4   1 -11    4.08    0.58
   3  -1 -11    8.52    0.68
   3  -1 -11    9.48    0.77
   3   1 -11    9.30    0.69
   3   1 -11    9.43    0.77
   3   1 -11    8.05    0.58
   2  -1 -11    3.89    0.61
   2  -1 -11    6.50    0.62
   2   1 -11    5.91    0.58
   2   1 -11    5.07    0.54
   2   1 -11    6.17    0.71
   1  -1 -11    3.73    0.60
   1  -1 -11    3.54    0.44
   1   1 -11    4.40    0.67
   1   1 -11    3.45    0.43
   1   1 -11    4.18    0.53
   0  -1 -11    8.65    0.79
   0  -1 -11    8.57    0.86
   0  -1 -11    8.73    0.53
   0   1 -11    8.59    0.90
   0   1 -11    8.72    0.48
   0   1 -11    8.80    0.80
  -1  -1 -11    0.33    0.30
  -1  -1 -11    0.34    0.30
  -1  -1 -11    0.65    0.20
  -1   1 -11    0.33    0.31
  -1   1 -11    0.42    0.32
  -2  -1 -11    0.04    0.32
  -2  -1 -11    0.11    0.30
  -2   1 -11   -0.26    0.24
  -2   1 -11    0.48    0.35
  -3  -1 -11   12.03    1.08
  -3  -1 -11   11.55    1.11
  -3   1 -11   14.06    1.08
  -3   1 -11   11.05    1.02
  -4  -1 -11    1.97    0.53
  -4  -1 -11    1.90    0.53
  -4   1 -11    2.18    0.56
  -4   1 -11    1.45    0.51
  -5  -1 -11   15.45    1.19
  -5   1 -11   15.09    1.20
  -5   1 -11   13.75    1.08
  -6  -1 -11    0.19    0.43
  -6   1 -11    0.24    0.43
  -6   1 -11    0.52    0.47
  -7  -1 -11    5.95    0.93
  -7   1 -11    6.80    1.01
  -7   1 -11    6.46    0.94
 -10  -2  11   10.46    1.18
  10  -2 -11   11.91    1.28
 -10   2  11   11.17    1.28
  10   2 -11    9.78    1.17
  -9  -2  11    0.29    0.46
   9  -2 -11   -0.10    0.48
  -9   2  11   -0.45    0.35
   9   2 -11    0.90    0.54
   8  -2 -11   10.97    1.02
  -8  -2  11   12.37    1.02
   8  -2 -11    9.46    1.05
  -8   2  11   11.08    1.11
   8   2 -11    8.52    1.00
   7  -2 -11    5.41    0.74
  -7  -2  11    4.44    0.72
   7  -2 -11    5.28    0.81
   7   2 -11    4.61    0.76
  -7   2  11    4.08    0.66
   6  -2 -11    4.96    0.72
   6  -2 -11    5.01    0.73
  -6  -2  11    4.74    0.70
   6   2 -11    6.41    0.68
   6   2 -11    5.64    0.77
  -6   2  11    4.67    0.68
  -5  -2  11   18.79    1.03
   5  -2 -11   19.46    1.09
   5  -2 -11   16.42    1.04
   5   2 -11   17.34    0.96
   5   2 -11   14.41    0.98
  -5   2  11   18.02    1.03
   4  -2 -11    6.09    0.69
   4  -2 -11    4.40    0.63
   4   2 -11    5.83    0.67
  -4   2  11    5.87    0.68
   4   2 -11    6.82    0.76
   3  -2 -11   -0.24    0.21
   3  -2 -11    0.16    0.26
   3   2 -11    0.14    0.23
   3   2 -11    0.30    0.22
   3   2 -11    0.26    0.27
   2  -2 -11    4.57    0.66
   2  -2 -11    4.90    0.57
   2   2 -11    5.56    0.69
   2   2 -11    5.36    0.56
   2   2 -11    4.65    0.52
   1  -2 -11   26.77    1.01
   1  -2 -11   28.00    1.34
   1   2 -11   27.56    1.11
   1   2 -11   26.64    1.23
   1   2 -11   29.28    0.96
   0  -2 -11   16.38    0.72
   0  -2 -11   16.59    1.06
   0   2 -11   16.62    0.93
   0   2 -11   17.09    0.64
   0   2 -11   15.71    1.02
  -1  -2 -11    0.68    0.22
  -1  -2 -11    0.67    0.36
  -1   2 -11    1.30    0.45
  -1   2 -11    1.22    0.38
  -2  -2 -11    6.97    0.89
  -2   2 -11    4.98    0.73
  -2   2 -11    3.76    0.58
  -3  -2 -11   14.91    1.09
  -3   2 -11   11.42    1.12
  -3   2 -11   11.94    0.94
  -4  -2 -11    0.57    0.39
  -4   2 -11    1.80    0.53
  -4   2 -11    1.69    0.51
  -5  -2 -11    2.55    0.64
  -5   2 -11    3.58    0.66
  -5   2 -11    2.80    0.69
  -6  -2 -11   11.71    1.26
  -6   2 -11    8.50    1.12
  -6   2 -11    7.33    0.99
  10  -3 -11    2.20    0.75
 -10  -3  11    1.79    0.63
 -10   3  11    2.06    0.67
  10   3 -11    3.93    0.90
  -9  -3  11   -0.52    0.34
   9  -3 -11   -0.75    0.44
   9   3 -11    0.41    0.52
  -9   3  11    0.32    0.43
   8  -3 -11    1.97    0.62
  -8  -3  11    0.44    0.43
  -8   3  11    0.42    0.41
   8   3 -11    0.11    0.45
   7  -3 -11    1.54    0.54
  -7  -3  11    0.64    0.37
   7  -3 -11    0.61    0.39
  -7   3  11    0.75    0.37
   7   3 -11    1.36    0.52
   6  -3 -11   -0.47    0.32
   6  -3 -11   -0.03    0.29
  -6  -3  11   -0.22    0.27
  -6   3  11    0.09    0.29
   6   3 -11    0.10    0.37
   5  -3 -11    2.67    0.55
   5  -3 -11    3.02    0.58
   5   3 -11    2.88    0.48
  -5   3  11    2.59    0.51
   5   3 -11    2.22    0.54
   4  -3 -11   14.15    0.92
   4  -3 -11   13.51    0.96
  -4   3  11   15.88    0.93
   4   3 -11   14.59    0.90
   4   3 -11   14.64    0.87
   3  -3 -11   20.54    1.03
   3  -3 -11   19.79    1.12
   3   3 -11   19.10    0.94
   3   3 -11   19.07    1.01
   3   3 -11   20.58    0.86
   2  -3 -11   -0.32    0.26
   2  -3 -11   -0.06    0.22
   2   3 -11    0.16    0.22
   2   3 -11    0.18    0.25
   2   3 -11    0.60    0.32
   1  -3 -11    5.73    0.75
   1  -3 -11    6.07    0.59
   1   3 -11    5.30    0.61
   1   3 -11    6.26    0.54
   1   3 -11    4.87    0.64
   0  -3 -11   -0.20    0.18
   0  -3 -11   -0.28    0.26
   0   3 -11    0.52    0.32
   0   3 -11   -0.10    0.16
   0   3 -11    0.28    0.28
  -1  -3 -11    0.10    0.18
  -1  -3 -11    0.13    0.28
  -1   3 -11    0.12    0.27
  -1   3 -11    0.09    0.30
  -2  -3 -11   -0.09    0.28
  -2   3 -11   -0.29    0.25
  -2   3 -11    0.32    0.30
  -3  -3 -11   13.60    1.02
  -3   3 -11   12.18    1.18
  -3   3 -11   11.53    0.94
  -4  -3 -11   12.65    1.04
  -4   3 -11   12.20    1.21
  -4   3 -11   12.54    1.01
  -5  -3 -11   -0.16    0.35
  -5   3 -11    0.27    0.40
  -5   3 -11    0.11    0.34
  -6  -3 -11   13.67    1.36
  -6   3 -11   15.56    1.23
  -6   3 -11   14.16    1.40
  -9  -4  11    4.27    0.83
   9  -4 -11    5.54    0.98
   9   4 -11    3.19    0.81
  -9   4  11    4.63    0.85
  -8  -4  11    5.06    0.82
   8  -4 -11    4.32    0.83
   8   4 -11    4.85    0.86
  -8   4  11    3.45    0.69
   7  -4 -11    2.14    0.57
  -7  -4  11    1.88    0.52
  -7   4  11    2.32    0.58
   7   4 -11    1.77    0.51
  -6  -4  11    0.30    0.31
   6  -4 -11   -0.20    0.30
   6   4 -11   -0.15    0.33
  -6   4  11    0.11    0.31
   5  -4 -11   21.74    1.17
   5  -4 -11   20.87    1.21
   5   4 -11   22.95    1.19
  -5   4  11   20.22    1.14
   4  -4 -11   26.75    1.34
   4  -4 -11   27.20    1.26
  -4   4  11   29.36    1.27
   4   4 -11   26.30    1.13
   4   4 -11   24.65    1.19
   3  -4 -11    1.22    0.40
   3  -4 -11    1.22    0.42
   3   4 -11    0.70    0.28
   3   4 -11    1.27    0.38
   3   4 -11    1.17    0.37
   2  -4 -11    0.00    0.25
   2  -4 -11    0.28    0.31
   2   4 -11    0.50    0.31
   2   4 -11    0.16    0.25
   2   4 -11    0.10    0.24
   1  -4 -11   11.22    0.71
   1  -4 -11   11.62    0.92
   1   4 -11   12.62    0.89
   1   4 -11   11.85    0.79
   1   4 -11   11.52    0.65
   0  -4 -11    5.83    0.77
   0  -4 -11    5.37    0.55
   0   4 -11    6.28    0.44
   0   4 -11    7.51    0.85
   0   4 -11    6.34    0.69
  -1  -4 -11    0.99    0.27
  -1  -4 -11    0.98    0.40
  -1   4 -11    0.57    0.35
  -1   4 -11    0.99    0.38
  -2  -4 -11    0.08    0.30
  -2  -4 -11    0.17    0.20
  -2   4 -11    0.31    0.36
  -2   4 -11    0.39    0.33
  -3  -4 -11   12.15    0.99
  -3   4 -11   12.65    1.02
  -3   4 -11   10.57    1.02
  -4  -4 -11   -0.41    0.30
  -4   4 -11   -0.31    0.28
  -4   4 -11   -0.13    0.31
  -5  -4 -11    8.69    1.03
  -5   4 -11   11.67    1.21
  -5   4 -11   10.64    1.20
  -6  -4 -11    7.05    1.00
  -6   4 -11    6.68    0.97
  -6   4 -11    7.48    1.08
  -9  -5  11    0.87    0.47
   9  -5 -11    2.77    0.76
   9   5 -11    1.61    0.63
  -9   5  11    1.69    0.63
   8  -5 -11    2.50    0.68
  -8  -5  11    3.69    0.72
  -8   5  11    3.27    0.68
   8   5 -11    2.57    0.67
  -7  -5  11    1.81    0.55
   7  -5 -11    0.99    0.47
  -7   5  11    0.49    0.36
   7   5 -11    0.92    0.48
   6  -5 -11    0.15    0.37
  -6  -5  11    0.49    0.35
  -6   5  11    0.43    0.36
   6   5 -11    0.06    0.34
   5  -5 -11    6.63    0.84
   5  -5 -11    4.14    0.65
  -5   5  11    6.07    0.76
   5   5 -11    4.95    0.70
   4  -5 -11   10.20    1.00
   4  -5 -11   10.95    0.86
   4   5 -11    8.33    0.81
  -4   5  11   10.27    0.80
   4   5 -11    8.72    0.69
   3  -5 -11    0.62    0.35
   3  -5 -11    0.49    0.37
   3   5 -11    0.39    0.32
   3   5 -11    0.99    0.36
   3   5 -11    0.93    0.30
   2  -5 -11   34.18    1.52
   2  -5 -11   32.46    1.28
   2   5 -11   32.07    1.32
   2   5 -11   31.82    1.21
   2   5 -11   30.58    1.15
   1  -5 -11   25.38    1.29
   1  -5 -11   24.73    1.07
   1   5 -11   26.05    1.14
   1   5 -11   23.92    0.93
   1   5 -11   21.92    1.15
   0  -5 -11    6.26    0.62
   0  -5 -11    4.38    0.67
   0   5 -11    7.20    0.82
   0   5 -11    5.28    0.46
   0   5 -11    5.49    0.66
  -1  -5 -11   12.50    0.71
  -1  -5 -11   11.17    0.92
  -1   5 -11   11.05    0.85
  -1   5 -11   10.01    0.99
  -2  -5 -11    6.50    0.84
  -2  -5 -11    6.93    0.53
  -2   5 -11    7.46    0.89
  -2   5 -11    7.20    0.87
  -3  -5 -11   27.51    1.45
  -3   5 -11   29.06    1.51
  -3   5 -11   27.97    1.42
  -4  -5 -11   51.57    2.02
  -4   5 -11   51.21    2.02
  -4   5 -11   51.21    2.09
  -5  -5 -11   38.98    1.80
  -5   5 -11   40.75    1.92
  -5   5 -11   39.25    1.83
  -6  -5 -11   -0.25    0.34
  -6   5 -11   -0.10    0.39
  -6   5 -11    0.69    0.49
   9  -6 -11    0.90    0.60
  -9  -6  11    1.10    0.50
   9   6 -11    1.23    0.60
  -9   6  11    2.73    0.73
  -8  -6  11    1.04    0.47
   8  -6 -11    1.12    0.58
   8   6 -11    1.46    0.56
  -8   6  11    1.67    0.60
  -7  -6  11    0.32    0.35
   7  -6 -11    0.07    0.39
  -7   6  11    0.22    0.36
   7   6 -11    1.10    0.50
   6  -6 -11    1.48    0.55
  -6   6  11    0.54    0.39
   6   6 -11    2.53    0.58
   5  -6 -11    4.98    0.74
   5   6 -11    3.46    0.61
  -5   6  11    4.41    0.66
   4  -6 -11   15.01    1.01
   4  -6 -11   17.10    1.12
   4   6 -11   15.33    0.99
   3  -6 -11   21.20    1.26
   3  -6 -11   20.92    1.12
   3   6 -11   22.34    1.06
   3   6 -11   21.90    1.08
   3   6 -11   21.52    0.98
   2  -6 -11    9.81    0.98
   2  -6 -11   11.14    0.81
   2   6 -11   12.41    0.77
   2   6 -11   10.88    0.82
   2   6 -11   10.84    0.76
   1  -6 -11    1.46    0.49
   1  -6 -11    0.16    0.29
   1   6 -11    0.74    0.33
   1   6 -11    0.83    0.38
   1   6 -11    0.17    0.26
   0  -6 -11    1.79    0.49
   0  -6 -11    0.74    0.32
   0   6 -11    1.94    0.46
   0   6 -11    1.66    0.31
   0   6 -11    1.43    0.45
  -1  -6 -11    0.81    0.43
  -1  -6 -11    1.17    0.34
  -1   6 -11    0.97    0.41
  -1   6 -11    1.05    0.43
  -2  -6 -11   14.18    1.04
  -2  -6 -11   13.26    0.74
  -2   6 -11   11.96    0.95
  -2   6 -11   14.04    1.08
  -3  -6 -11   43.72    1.84
  -3  -6 -11   43.33    1.29
  -3   6 -11   46.34    1.95
  -3   6 -11   47.63    1.88
  -4  -6 -11   -0.08    0.33
  -4   6 -11    0.18    0.39
  -4   6 -11    0.21    0.39
  -5  -6 -11    2.01    0.56
  -5   6 -11    2.78    0.69
  -5   6 -11    2.85    0.70
  -6  -6 -11    0.64    0.47
  -6   6 -11    0.26    0.47
  -6   6 -11    1.13    0.55
  -9  -7  11    8.32    1.11
   9  -7 -11    8.03    1.13
   9   7 -11    9.11    1.20
  -9   7  11    7.36    1.03
   8  -7 -11   -0.59    0.41
  -8  -7  11   -0.14    0.37
   8   7 -11   -0.01    0.47
  -8   7  11    0.56    0.44
   7  -7 -11    5.35    0.87
  -7  -7  11    5.15    0.78
  -7   7  11    6.38    0.93
   7   7 -11    3.53    0.70
   6  -7 -11    0.19    0.41
   6   7 -11    1.17    0.47
  -6   7  11   -0.20    0.32
   5  -7 -11   13.31    1.01
  -5   7  11   14.96    1.05
   5   7 -11   12.23    0.98
   4  -7 -11   35.41    1.53
   4  -7 -11   34.49    1.62
   4   7 -11   37.12    1.50
  -4   7  11   38.19    1.59
   3  -7 -11    8.47    0.86
   3  -7 -11    9.84    1.04
   3   7 -11    8.55    0.79
   3   7 -11    9.07    0.84
   3   7 -11    8.78    0.70
   2  -7 -11    1.53    0.44
   2  -7 -11    2.56    0.59
   2   7 -11    3.33    0.50
   2   7 -11    2.30    0.47
   2   7 -11    2.26    0.47
   1  -7 -11   -0.11    0.27
   1  -7 -11    0.23    0.30
   1   7 -11   -0.18    0.24
   1   7 -11   -0.11    0.28
   1   7 -11    0.07    0.25
   0  -7 -11   -0.24    0.23
   0  -7 -11   -0.29    0.24
   0   7 -11    0.11    0.32
   0   7 -11   -0.29    0.26
   0   7 -11    0.14    0.23
  -1  -7 -11   14.98    0.86
  -1  -7 -11   13.87    1.03
  -1   7 -11   15.14    1.08
  -1   7 -11   14.24    1.00
  -2  -7 -11    0.90    0.32
  -2  -7 -11    1.30    0.49
  -2   7 -11    0.99    0.43
  -2   7 -11    1.20    0.47
  -3  -7 -11    0.99    0.44
  -3  -7 -11    1.35    0.34
  -3   7 -11    1.15    0.49
  -3   7 -11    1.42    0.50
  -4  -7 -11   -0.18    0.30
  -4   7 -11   -0.01    0.37
  -4   7 -11    0.17    0.38
  -5  -7 -11   -0.39    0.31
  -5   7 -11    0.78    0.48
  -5   7 -11    0.38    0.45
  -8  -8  11    0.14    0.46
   8  -8 -11    0.26    0.48
   8   8 -11    1.49    0.64
  -8   8  11    1.53    0.57
   7  -8 -11    0.27    0.47
  -7   8  11    0.42    0.38
   7   8 -11    1.00    0.51
   6  -8 -11   -0.30    0.36
  -6   8  11   -0.47    0.30
   6   8 -11   -0.17    0.35
   5  -8 -11    0.79    0.44
   5   8 -11    0.36    0.42
   4  -8 -11    4.91    0.73
   4   8 -11    6.20    0.77
  -4   8  11    4.66    0.68
   3  -8 -11    4.69    0.80
   3  -8 -11    4.42    0.70
   3   8 -11    3.79    0.60
   3   8 -11    3.42    0.53
   2  -8 -11    8.30    0.98
   2  -8 -11    7.34    0.84
   2   8 -11    6.95    0.72
   2   8 -11    7.38    0.79
   2   8 -11    7.47    0.78
   1  -8 -11   -0.03    0.30
   1  -8 -11   -0.20    0.26
   1   8 -11   -0.32    0.24
   1   8 -11   -0.02    0.28
   1   8 -11    0.11    0.28
   0  -8 -11    4.46    0.62
   0  -8 -11    3.44    0.64
   0   8 -11    3.08    0.58
   0   8 -11    2.42    0.39
   0   8 -11    2.64    0.57
  -1  -8 -11    3.47    0.70
  -1  -8 -11    2.81    0.52
  -1   8 -11    2.39    0.53
  -1   8 -11    2.13    0.58
  -2  -8 -11   21.88    1.06
  -2  -8 -11   25.25    1.39
  -2   8 -11   24.64    1.42
  -2   8 -11   24.66    1.36
  -3  -8 -11    9.37    0.73
  -3  -8 -11    9.85    1.05
  -3   8 -11    9.70    1.11
  -3   8 -11   11.15    1.17
  -4  -8 -11   19.98    1.28
  -4   8 -11   17.32    1.28
  -4   8 -11   20.51    1.39
  -5  -8 -11    5.56    0.86
  -5   8 -11    6.61    1.02
  -5   8 -11    6.85    1.00
   8  -9 -11    3.49    0.83
   8   9 -11    6.15    1.01
  -8   9  11    5.78    0.92
   7  -9 -11    3.18    0.75
   7   9 -11    2.66    0.67
  -7   9  11    2.00    0.60
   6  -9 -11   -0.28    0.40
   6   9 -11    0.34    0.48
   5  -9 -11   -0.33    0.36
   5   9 -11   -0.05    0.40
  -5   9  11    0.15    0.33
   4  -9 -11    5.23    0.80
  -4   9  11    5.06    0.75
   4   9 -11    5.52    0.77
   3  -9 -11   27.17    1.41
   3  -9 -11   27.08    1.51
   3   9 -11   29.15    1.27
   3   9 -11   27.27    1.30
   2  -9 -11    2.63    0.64
   2  -9 -11    2.43    0.55
   2   9 -11    2.43    0.50
   2   9 -11    3.15    0.55
   2   9 -11    2.62    0.52
   1  -9 -11    0.64    0.44
   1  -9 -11   -0.06    0.32
   1   9 -11    0.30    0.31
   1   9 -11    0.52    0.31
   1   9 -11    0.54    0.34
   0  -9 -11    5.90    0.84
   0  -9 -11    6.29    0.74
   0   9 -11    6.65    0.61
   0   9 -11    5.40    0.75
   0   9 -11    4.94    0.70
  -1  -9 -11    2.53    0.53
  -1  -9 -11    1.51    0.50
  -1   9 -11    1.31    0.48
  -1   9 -11    1.35    0.47
  -2  -9 -11    5.09    0.82
  -2  -9 -11    4.10    0.60
  -2   9 -11    4.32    0.73
  -2   9 -11    3.73    0.70
  -3  -9 -11    0.36    0.32
  -3  -9 -11    0.53    0.39
  -3   9 -11    1.13    0.51
  -3   9 -11    1.61    0.54
  -4  -9 -11    8.24    1.05
  -4  -9 -11    5.95    0.70
  -4   9 -11    6.67    0.98
  -4   9 -11    8.11    1.09
   7 -10 -11    1.32    0.60
   7  10 -11    2.39    0.73
  -7  10  11    2.20    0.62
   6 -10 -11    4.96    0.88
   6  10 -11    4.82    0.85
  -6  10  11    4.56    0.83
   5 -10 -11    0.46    0.43
   5  10 -11    0.16    0.43
  -5  10  11    0.22    0.42
   4 -10 -11   12.38    1.20
  -4  10  11   14.25    1.09
   4  10 -11   12.59    1.14
   3 -10 -11    5.50    0.82
   3 -10 -11    5.72    0.92
   3  10 -11    5.64    0.68
   3  10 -11    6.07    0.79
   2 -10 -11    2.72    0.62
   2 -10 -11    1.38    0.55
   2  10 -11    1.45    0.45
   2  10 -11    1.17    0.44
   1 -10 -11    2.04    0.58
   1 -10 -11    2.38    0.56
   1  10 -11    1.50    0.45
   1  10 -11    1.81    0.45
   1  10 -11    2.50    0.52
   0 -10 -11   -0.33    0.26
   0 -10 -11    0.32    0.36
   0  10 -11    0.47    0.37
   0  10 -11    0.44    0.28
   0  10 -11    0.44    0.36
  -1 -10 -11    1.72    0.56
  -1 -10 -11    1.89    0.50
  -1  10 -11    1.66    0.55
  -1  10 -11    2.24    0.60
  -2 -10 -11    1.16    0.45
  -2 -10 -11    2.21    0.59
  -2  10 -11    1.72    0.58
  -2  10 -11    1.14    0.52
  -3 -10 -11    3.98    0.65
  -3 -10 -11    4.34    0.80
  -3  10 -11    4.02    0.81
  -3  10 -11    6.36    0.97
  -4 -10 -11    4.58    0.66
  -4 -10 -11    2.94    0.67
  -4  10 -11    3.33    0.71
  -4  10 -11    3.87    0.84
   6 -11 -11    0.25    0.52
  -6  11  11    0.02    0.42
   6  11 -11   -0.61    0.37
   5 -11 -11    0.63    0.46
  -5  11  11    0.41    0.40
   5  11 -11    0.29    0.45
   4 -11 -11    1.07    0.55
   4  11 -11    1.02    0.52
  -4  11  11    2.03    0.58
   3 -11 -11    0.12    0.43
   3 -11 -11    0.68    0.46
   3  11 -11    0.03    0.37
   3  11 -11    0.59    0.36
   2 -11 -11    1.26    0.51
   2 -11 -11    1.94    0.59
   2  11 -11    1.18    0.47
   2  11 -11    1.44    0.47
   1 -11 -11    3.45    0.67
   1 -11 -11    4.44    0.81
   1  11 -11    2.67    0.52
   1  11 -11    4.06    0.69
   0 -11 -11    1.54    0.51
   0 -11 -11    1.02    0.47
   0  11 -11    1.87    0.59
   0  11 -11    1.83    0.43
   0  11 -11    1.67    0.50
  -1 -11 -11   -0.34    0.32
  -1 -11 -11    0.15    0.36
  -1  11 -11   -0.09    0.33
  -1  11 -11    0.38    0.38
  -2 -11 -11    0.99    0.49
  -2 -11 -11    1.53    0.49
  -2  11 -11    1.60    0.57
  -2  11 -11    1.32    0.53
  -3 -11 -11    0.05    0.39
  -3 -11 -11    1.38    0.47
  -3  11 -11    0.11    0.39
  -3  11 -11    2.93    0.74
   5 -12 -11    2.41    0.70
   5  12 -11    2.01    0.68
  -5  12  11    2.24    0.67
   4 -12 -11    1.61    0.60
   4  12 -11    1.82    0.60
  -4  12  11    1.98    0.64
   3 -12 -11    1.75    0.57
   3  12 -11    0.95    0.43
   3  12 -11    1.46    0.54
   2 -12 -11    5.98    0.89
   2 -12 -11    7.10    1.01
   2  12 -11    6.76    0.84
   2  12 -11    8.30    0.92
   1 -12 -11    0.08    0.39
   1 -12 -11   -0.48    0.32
   1  12 -11    0.36    0.34
   1  12 -11    0.52    0.44
   0 -12 -11    1.37    0.52
   0 -12 -11    1.11    0.48
   0  12 -11    1.09    0.41
   0  12 -11    1.17    0.49
  -1 -12 -11   11.35    1.11
  -1 -12 -11   12.09    1.23
  -1  12 -11   12.95    1.24
  -2 -12 -11    0.45    0.44
  -2 -12 -11   -0.28    0.33
  -2  12 -11    0.19    0.42
   4 -13 -11    0.70    0.55
   4  13 -11   -0.15    0.43
   3 -13 -11    2.12    0.68
   3  13 -11    1.22    0.54
   3  13 -11    1.58    0.50
   2 -13 -11   19.61    1.45
   2 -13 -11   17.32    1.31
   2  13 -11   17.39    1.18
   2  13 -11   16.66    1.18
   1 -13 -11    2.04    0.64
   1 -13 -11    2.18    0.66
   1  13 -11    2.41    0.57
   1  13 -11    1.48    0.55
   0 -13 -11   -0.64    0.35
   0 -13 -11   -0.10    0.33
   0  13 -11   -0.22    0.32
   0  13 -11   -0.28    0.38
  -1 -13 -11    1.09    0.52
  -1 -13 -11    1.47    0.55
  -1  13 -11    0.74    0.50
  -9   0  12    0.21    0.38
   9   0 -12   -0.36    0.43
  -8   0  12   24.34    1.43
   8   0 -12   23.02    1.43
   7   0 -12   -0.14    0.36
  -7   0  12    0.01    0.31
   7   0 -12   -0.17    0.30
   6   0 -12   10.10    0.94
   6   0 -12   10.82    1.05
   5   0 -12   -0.29    0.25
   5   0 -12    0.08    0.35
   4   0 -12    0.43    0.36
   4   0 -12   -0.26    0.30
   3   0 -12    0.04    0.30
   3   0 -12   -0.31    0.22
   2   0 -12   25.66    1.05
   2   0 -12   27.41    1.07
   2   0 -12   29.09    1.37
   1   0 -12    0.09    0.22
   1   0 -12    0.06    0.29
   1   0 -12    0.29    0.29
   0   0 -12    0.35    0.21
   0   0 -12   -0.12    0.24
   0   0 -12   -0.16    0.31
  -1   0 -12   -0.21    0.30
  -1   0 -12    0.02    0.29
  -2   0 -12   10.96    0.89
  -2   0 -12    9.62    1.03
  -3   0 -12   -0.03    0.36
  -3   0 -12   -0.19    0.27
  -4   0 -12   15.64    1.23
  -4   0 -12   15.41    1.15
  -5   0 -12    0.51    0.42
  -5   0 -12    0.19    0.43
  -6   0 -12    3.09    0.79
   9  -1 -12    1.62    0.67
  -9  -1  12    1.99    0.62
  -9   1  12    2.84    0.74
   9   1 -12    3.04    0.79
   8  -1 -12    0.73    0.47
  -8  -1  12   -0.52    0.28
  -8   1  12    0.20    0.39
   8   1 -12    0.12    0.47
   7  -1 -12    0.33    0.33
   7  -1 -12    0.35    0.44
  -7  -1  12    0.45    0.38
   7   1 -12   -0.44    0.34
  -7   1  12   -0.34    0.24
   6  -1 -12    0.12    0.28
   6  -1 -12    0.52    0.39
   6   1 -12    0.34    0.33
  -6   1  12    0.03    0.32
   6   1 -12    0.58    0.41
   5  -1 -12    3.12    0.59
   5  -1 -12    3.26    0.59
   5   1 -12    2.82    0.54
   5   1 -12    4.03    0.66
   4  -1 -12   10.91    0.84
   4  -1 -12   14.43    1.00
   4   1 -12   12.50    0.89
   4   1 -12   13.16    0.93
   3  -1 -12    2.98    0.59
   3  -1 -12    2.58    0.49
   3   1 -12    1.97    0.50
   3   1 -12    1.77    0.41
   2  -1 -12   25.25    1.05
   2  -1 -12   26.82    1.35
   2   1 -12   26.78    1.07
   2   1 -12   24.45    1.01
   2   1 -12   23.45    1.24
   1  -1 -12   11.62    0.94
   1  -1 -12   13.35    0.72
   1   1 -12   13.66    0.99
   1   1 -12   12.57    0.81
   1   1 -12   12.28    0.67
   0  -1 -12    2.73    0.57
   0  -1 -12    2.63    0.36
   0   1 -12    1.78    0.29
   0   1 -12    2.25    0.46
   0   1 -12    1.51    0.49
  -1  -1 -12    1.91    0.48
  -1  -1 -12    2.27    0.57
  -1   1 -12    3.06    0.54
  -1   1 -12    1.93    0.53
  -2  -1 -12   -0.12    0.29
  -2  -1 -12   -0.21    0.29
  -2   1 -12   -0.18    0.29
  -2   1 -12    0.34    0.34
  -3  -1 -12    0.59    0.39
  -3   1 -12   -0.14    0.32
  -3   1 -12   -0.25    0.30
  -4  -1 -12    0.59    0.44
  -4   1 -12    1.13    0.48
  -4   1 -12   -0.25    0.31
  -5  -1 -12    0.37    0.45
  -5   1 -12    0.39    0.44
  -5   1 -12    0.67    0.46
  -6  -1 -12    0.81    0.50
  -6   1 -12    0.92    0.55
  -6   1 -12    0.26    0.44
   9  -2 -12    1.49    0.66
  -9  -2  12    0.71    0.48
  -9   2  12    0.87    0.52
   9   2 -12    0.63    0.54
   8  -2 -12   -0.25    0.45
   8  -2 -12    0.54    0.39
  -8  -2  12    0.09    0.36
  -8   2  12    0.89    0.48
   8   2 -12    0.03    0.44
  -7  -2  12    0.56    0.42
   7  -2 -12    1.28    0.52
   7  -2 -12    0.73    0.38
  -7   2  12    0.79    0.45
   7   2 -12    1.37    0.53
   6  -2 -12    8.63    0.95
   6  -2 -12    8.19    0.94
  -6   2  12    9.22    1.00
   6   2 -12   10.14    1.04
   5  -2 -12    0.23    0.36
   5  -2 -12    0.07    0.28
   5   2 -12    0.26    0.31
   5   2 -12   -0.25    0.27
   4  -2 -12    8.62    0.86
   4  -2 -12   10.59    1.01
   4   2 -12    9.07    0.86
   4   2 -12    9.46    0.89
   3  -2 -12    8.46    0.90
   3  -2 -12    8.93    0.74
   3   2 -12    8.46    0.77
   3   2 -12    8.09    0.85
   2  -2 -12    9.33    0.69
   2  -2 -12    9.74    0.96
   2   2 -12    8.08    0.62
   2   2 -12    9.16    0.67
   2   2 -12   10.59    0.99
   1  -2 -12   51.17    1.45
   1  -2 -12   50.54    1.89
   1   2 -12   50.72    1.36
   1   2 -12   54.99    1.65
   1   2 -12   48.96    1.82
   0  -2 -12    5.97    0.81
   0  -2 -12    6.73    0.50
   0   2 -12    4.93    0.73
   0   2 -12    5.95    0.71
  -1  -2 -12    6.26    0.84
  -1   2 -12    7.28    0.81
  -1   2 -12    5.49    0.75
  -2  -2 -12    1.29    0.49
  -2   2 -12    1.62    0.45
  -2   2 -12    0.58    0.44
  -3  -2 -12    1.41    0.54
  -3   2 -12    0.47    0.38
  -3   2 -12    1.55    0.53
  -4  -2 -12    2.58    0.65
  -4   2 -12    2.59    0.61
  -4   2 -12    3.63    0.74
  -5  -2 -12    1.80    0.57
  -5   2 -12    1.65    0.57
  -5   2 -12    1.75    0.60
  -6  -2 -12   -0.54    0.33
  -6   2 -12    0.10    0.46
  -6   2 -12    0.39    0.46
   9  -3 -12    6.51    1.04
  -9  -3  12    6.03    0.96
   9   3 -12    5.36    0.98
  -9   3  12    5.21    0.89
  -8  -3  12   -0.08    0.37
   8  -3 -12    0.19    0.37
   8  -3 -12    1.11    0.51
   8   3 -12   -0.12    0.37
  -8   3  12    0.13    0.38
  -7  -3  12    0.30    0.40
   7  -3 -12   -0.41    0.38
   7  -3 -12   -0.01    0.34
  -7   3  12    0.25    0.34
   7   3 -12    0.18    0.41
   6  -3 -12   -0.07    0.30
   6  -3 -12   -0.35    0.31
   6   3 -12   -0.20    0.35
  -6   3  12    0.23    0.31
   5  -3 -12    2.25    0.56
   5  -3 -12    2.20    0.54
   5   3 -12    2.38    0.49
   5   3 -12    3.35    0.57
   4  -3 -12    3.07    0.58
   4  -3 -12    1.90    0.49
   4   3 -12    1.85    0.45
   4   3 -12    2.35    0.49
   3  -3 -12    9.85    0.80
   3  -3 -12   12.13    0.95
   3   3 -12   11.89    0.87
   3   3 -12   12.34    0.79
   2  -3 -12    4.11    0.71
   2  -3 -12    3.97    0.53
   2   3 -12    5.78    0.74
   2   3 -12    5.58    0.58
   2   3 -12    5.03    0.59
   1  -3 -12    6.75    0.63
   1  -3 -12    6.27    0.84
   1   3 -12    6.90    0.58
   1   3 -12    6.41    0.81
   1   3 -12    7.25    0.74
   0  -3 -12   14.40    1.07
   0  -3 -12   14.28    0.73
   0   3 -12   15.73    0.95
   0   3 -12   13.86    1.02
  -1  -3 -12   27.17    0.89
  -1  -3 -12   24.22    1.38
  -1   3 -12   26.31    1.41
  -1   3 -12   25.07    1.25
  -2  -3 -12    1.26    0.47
  -2   3 -12    0.49    0.38
  -2   3 -12    0.43    0.39
  -3  -3 -12    0.65    0.41
  -3   3 -12    0.24    0.35
  -3   3 -12   -0.36    0.26
  -4  -3 -12   -0.55    0.29
  -4   3 -12   -0.24    0.29
  -4   3 -12   -0.10    0.36
  -5  -3 -12    7.81    1.04
  -5   3 -12    9.66    1.13
  -5   3 -12    8.23    1.06
   9  -4 -12    4.05    0.81
  -9  -4  12    3.36    0.79
  -9   4  12    3.25    0.73
   9   4 -12    2.62    0.80
   8  -4 -12    9.68    1.05
   8  -4 -12   12.78    1.29
  -8  -4  12   11.12    1.18
   8   4 -12   13.60    1.35
  -8   4  12    9.64    1.09
   7  -4 -12    7.07    0.96
   7  -4 -12    6.22    0.89
   7   4 -12    4.82    0.80
  -7   4  12    6.40    0.87
   6  -4 -12    2.48    0.61
   6  -4 -12    1.27    0.50
   6   4 -12    1.56    0.53
  -6   4  12    1.20    0.45
   5  -4 -12    7.07    0.87
   5  -4 -12    7.79    0.90
   5   4 -12    8.09    0.89
   4  -4 -12    7.90    0.84
   4  -4 -12    8.16    0.95
   4   4 -12   10.22    0.80
   4   4 -12    9.10    0.74
   3  -4 -12    3.42    0.57
   3  -4 -12    2.72    0.58
   3   4 -12    3.11    0.51
   3   4 -12    2.87    0.54
   2  -4 -12   14.72    0.89
   2  -4 -12   12.90    1.00
   2   4 -12   15.03    0.86
   2   4 -12   17.41    1.04
   2   4 -12   14.55    0.81
   1  -4 -12    1.33    0.34
   1  -4 -12    1.76    0.50
   1   4 -12    0.72    0.37
   1   4 -12    0.80    0.33
   1   4 -12    1.13    0.31
   0  -4 -12    6.78    0.62
   0  -4 -12    7.92    0.96
   0   4 -12    8.12    0.94
   0   4 -12    6.70    0.73
  -1  -4 -12    4.37    0.47
  -1  -4 -12    4.50    0.78
  -1   4 -12    4.14    0.62
  -1   4 -12    2.54    0.61
  -2  -4 -12   17.06    1.17
  -2   4 -12   16.15    1.09
  -2   4 -12   16.07    1.15
  -3  -4 -12    7.17    0.96
  -3   4 -12    6.67    0.94
  -3   4 -12    5.98    0.87
  -4  -4 -12    2.86    0.66
  -4   4 -12    3.92    0.82
  -4   4 -12    3.41    0.68
  -5  -4 -12    0.08    0.39
  -5   4 -12   -0.01    0.44
  -5   4 -12    0.09    0.39
  -9  -5  12    0.02    0.45
   9  -5 -12    0.55    0.57
   9   5 -12    0.86    0.63
  -9   5  12    0.38    0.48
   8  -5 -12    1.18    0.61
  -8  -5  12    1.76    0.58
   8   5 -12    1.38    0.60
  -8   5  12    2.39    0.67
   7  -5 -12    2.31    0.67
   7  -5 -12    1.95    0.62
   7   5 -12    3.16    0.69
  -7   5  12    3.00    0.68
   6  -5 -12    7.43    0.98
   6  -5 -12    8.32    1.00
   6   5 -12    6.14    0.87
  -6   5  12    5.90    0.84
   5  -5 -12   16.66    1.15
   5  -5 -12   18.34    1.17
   5   5 -12   19.19    1.14
   4  -5 -12    0.98    0.44
   4  -5 -12    0.46    0.40
   4   5 -12    0.08    0.28
   4   5 -12    0.17    0.34
   3  -5 -12    2.16    0.56
   3  -5 -12    2.20    0.49
   3   5 -12    1.46    0.43
   3   5 -12    1.40    0.40
   2  -5 -12    7.20    0.89
   2  -5 -12    7.10    0.74
   2   5 -12    5.87    0.66
   2   5 -12    6.24    0.62
   2   5 -12    7.47    0.82
   1  -5 -12    2.20    0.45
   1  -5 -12    2.51    0.60
   1   5 -12    2.29    0.39
   1   5 -12    2.12    0.45
   1   5 -12    2.00    0.48
   0  -5 -12   19.04    1.21
   0  -5 -12   20.37    0.95
   0   5 -12   20.65    1.20
   0   5 -12   20.14    1.11
  -1  -5 -12    3.62    0.66
  -1  -5 -12    3.80    0.48
  -1   5 -12    3.17    0.64
  -1   5 -12    4.15    0.65
  -2  -5 -12    0.63    0.42
  -2   5 -12    0.05    0.36
  -2   5 -12    0.00    0.28
  -3  -5 -12   14.90    1.16
  -3   5 -12   15.27    1.22
  -3   5 -12   12.94    1.21
  -4  -5 -12   29.90    1.64
  -4   5 -12   29.38    1.59
  -4   5 -12   28.70    1.67
  -5  -5 -12    0.63    0.48
  -5   5 -12    0.86    0.51
  -5   5 -12    1.14    0.57
   8  -6 -12   -0.52    0.40
   8   6 -12    0.41    0.52
  -8   6  12    0.25    0.41
   7  -6 -12    2.79    0.70
  -7   6  12    2.25    0.59
   7   6 -12    2.15    0.59
   6  -6 -12    5.01    0.83
   6  -6 -12    3.18    0.69
   6   6 -12    5.38    0.77
  -6   6  12    4.43    0.73
   5  -6 -12   -0.12    0.35
   5  -6 -12    0.43    0.42
   5   6 -12   -0.22    0.31
   4  -6 -12    6.84    0.92
   4  -6 -12    8.12    0.92
   4   6 -12    9.21    0.90
   3  -6 -12    0.20    0.37
   3  -6 -12   -0.15    0.29
   3   6 -12    0.31    0.30
   3   6 -12    0.45    0.34
   2  -6 -12    5.01    0.81
   2  -6 -12    6.79    0.76
   2   6 -12    4.42    0.64
   2   6 -12    4.91    0.58
   2   6 -12    5.11    0.64
   1  -6 -12   14.88    1.14
   1  -6 -12   17.41    0.96
   1   6 -12   16.05    0.99
   1   6 -12   18.42    1.12
   1   6 -12   16.76    0.82
   0  -6 -12    0.19    0.31
   0  -6 -12   -0.23    0.26
[truncated: 35,357 more chars]
